# Supplementary material for: The Heat Shock Transcription Factor HsfA Is Essential for Thermotolerance and Regulates Cell Wall Integrity in Aspergillus fumigatus
Source: Front Microbiol. 2021 Apr 9;12:656548. doi: 10.3389/fmicb.2021.656548 (PMC8062887; doi:10.3389/fmicb.2021.656548)
Supplement: Supplementary file 2 [file Table_2.XLSX]

## Sheet: GO up wt HS 15' vs wt 30ºC
#Term	Database	ID	Input number	Background number	P-Value	Input	Hyperlink
cellular amino acid catabolic process	Gene Ontology	GO:0009063	13	35	0.00418524	Afu5g08940-T|Afu4g09140-T|Afu1g05570-T|Afu8g06470-T|Afu5g08910-T|Afu4g08170-T|Afu3g08050-T|Afu1g02780-T|Afu6g11430-T|Afu6g08760-T|Afu3g11430-T|Afu5g07510-T|Afu5g06680-T	http://amigo.geneontology.org/cgi-bin/amigo/term_details?term=GO:0009063
response to temperature stimulus	Gene Ontology	GO:0009266	18	61	0.00639223	Afu1g07440-T|Afu5g12960-T|Afu3g02280-T|Afu4g12850-T|Afu5g04170-T|Afu3g05650-T|Afu2g09290-T|Afu1g15950-T|Afu1g05040-T|Afu1g10850-T|Afu4g12990-T|Afu6g04940-T|Afu4g04502-T|Afu1g03040-T|Afu5g10270-T|Afu4g11330-T|Afu2g01170-T|Afu4g13530-T	http://amigo.geneontology.org/cgi-bin/amigo/term_details?term=GO:0009266
response to abiotic stimulus	Gene Ontology	GO:0009628	37	164	0.00726399	Afu3g07990-T|Afu3g02280-T|Afu5g10270-T|Afu4g12990-T|Afu6g04940-T|Afu2g01170-T|Afu4g09050-T|Afu5g12960-T|Afu2g13440-T|Afu2g09290-T|Afu1g15950-T|Afu8g05630-T|Afu1g02700-T|Afu3g05650-T|Afu5g08480-T|Afu4g04502-T|Afu1g03040-T|Afu4g11330-T|Afu5g04170-T|Afu1g10850-T|Afu2g17170-T|Afu2g14590-T|Afu1g15520-T|Afu4g09650-T|Afu2g00660-T|Afu6g14210-T|Afu8g04890-T|Afu1g07440-T|Afu6g09260-T|Afu5g13890-T|Afu4g1285…	http://amigo.geneontology.org/cgi-bin/amigo/term_details?term=GO:0009628
peptide transport	Gene Ontology	GO:0015833	7	13	0.0075335	Afu1g07440-T|Afu4g10000-T|Afu2g15240-T|Afu5g07970-T|Afu6g10630-T|Afu5g01630-T|Afu6g14210-T	http://amigo.geneontology.org/cgi-bin/amigo/term_details?term=GO:0015833
beta-glucan biosynthetic process	Gene Ontology	GO:0051274	7	13	0.0075335	Afu2g11870-T|Afu2g04620-T|Afu2g07590-T|Afu7g01830-T|Afu6g12400-T|Afu8g05620-T|Afu2g01170-T	http://amigo.geneontology.org/cgi-bin/amigo/term_details?term=GO:0051274
response to stress	Gene Ontology	GO:0006950	88	473	0.00838696	Afu4g03840-T|Afu1g10480-T|Afu5g10270-T|Afu4g11140-T|Afu4g12990-T|Afu5g09100-T|Afu2g01170-T|Afu7g01270-T|Afu3g05650-T|Afu6g14210-T|Afu7g02200-T|Afu8g04100-T|Afu5g11260-T|Afu7g06570-T|Afu2g04620-T|Afu6g09930-T|Afu2g08540-T|Afu2g17810-T|Afu2g03070-T|Afu2g08840-T|Afu1g11170-T|Afu4g11620-T|Afu4g06490-T|Afu6g04940-T|Afu1g11640-T|Afu6g10530-T|Afu1g02780-T|Afu3g12330-T|Afu1g02480-T|Afu6g12410-T|Afu4g1158…	http://amigo.geneontology.org/cgi-bin/amigo/term_details?term=GO:0006950
cellular response to heat	Gene Ontology	GO:0034605	13	39	0.00865071	Afu1g07440-T|Afu5g12960-T|Afu4g13530-T|Afu4g12850-T|Afu5g04170-T|Afu1g10850-T|Afu2g09290-T|Afu1g15950-T|Afu1g05040-T|Afu5g10270-T|Afu3g05650-T|Afu6g04940-T|Afu4g11330-T	http://amigo.geneontology.org/cgi-bin/amigo/term_details?term=GO:0034605
cellular response to organic substance	Gene Ontology	GO:0071310	20	74	0.00926913	Afu5g02920-T|Afu2g02260-T|Afu5g09310-T|Afu3g02280-T|Afu4g12850-T|Afu5g04170-T|Afu2g17110-T|Afu6g10740-T|Afu5g10270-T|Afu2g14590-T|Afu3g08050-T|Afu8g04100-T|Afu3g14330-T|Afu6g04750-T|Afu3g06790-T|Afu2g00660-T|Afu2g16240-T|Afu1g15270-T|Afu6g14210-T|Afu1g01720-T	http://amigo.geneontology.org/cgi-bin/amigo/term_details?term=GO:0071310
response to heat	Gene Ontology	GO:0009408	15	49	0.00936066	Afu1g07440-T|Afu5g12960-T|Afu4g13530-T|Afu4g12850-T|Afu5g04170-T|Afu1g10850-T|Afu2g09290-T|Afu1g15950-T|Afu1g05040-T|Afu5g10270-T|Afu3g05650-T|Afu6g04940-T|Afu4g04502-T|Afu1g03040-T|Afu4g11330-T	http://amigo.geneontology.org/cgi-bin/amigo/term_details?term=GO:0009408
response to chemical	Gene Ontology	GO:0042221	73	383	0.0097625	Afu2g02260-T|Afu3g02280-T|Afu4g06820-T|Afu5g07970-T|Afu2g08800-T|Afu5g10270-T|Afu2g07590-T|Afu4g01140-T|Afu4g12990-T|Afu5g09100-T|Afu7g01280-T|Afu6g11430-T|Afu6g04750-T|Afu5g08480-T|Afu1g09950-T|Afu2g01170-T|Afu5g07040-T|Afu5g12960-T|Afu1g12310-T|Afu2g16240-T|Afu4g04280-T|Afu7g01320-T|Afu1g07470-T|Afu3g08850-T|Afu1g15950-T|Afu6g10740-T|Afu3g13970-T|Afu4g08170-T|Afu4g09050-T|Afu3g05650-T|Afu6g1421…	http://amigo.geneontology.org/cgi-bin/amigo/term_details?term=GO:0042221
trehalose metabolic process	Gene Ontology	GO:0005991	8	18	0.0103203	Afu4g13530-T|Afu3g02280-T|Afu7g01830-T|Afu2g04020-T|Afu4g13230-T|Afu3g11830-T|Afu3g05650-T|Afu2g04010-T	http://amigo.geneontology.org/cgi-bin/amigo/term_details?term=GO:0005991
cellular carbohydrate metabolic process	Gene Ontology	GO:0044262	33	146	0.0105683	Afu2g11870-T|Afu3g02280-T|Afu3g11830-T|Afu2g07590-T|Afu7g01830-T|Afu2g01170-T|Afu5g11100-T|Afu7g01320-T|Afu7g06370-T|Afu4g13530-T|Afu4g13230-T|Afu8g05630-T|Afu4g03900-T|Afu3g05650-T|Afu7g06150-T|Afu5g01190-T|Afu8g02000-T|Afu1g15440-T|Afu2g10230-T|Afu2g04600-T|Afu2g04620-T|Afu8g05620-T|Afu2g00450-T|Afu2g03980-T|Afu6g12400-T|Afu4g12050-T|Afu2g04020-T|Afu1g16270-T|Afu2g00990-T|Afu2g13440-T|Afu2g0401…	http://amigo.geneontology.org/cgi-bin/amigo/term_details?term=GO:0044262
response to organic substance	Gene Ontology	GO:0010033	24	97	0.0113556	Afu2g02260-T|Afu3g02280-T|Afu6g10740-T|Afu5g10270-T|Afu3g14330-T|Afu6g04750-T|Afu5g07040-T|Afu4g13530-T|Afu8g04100-T|Afu5g09310-T|Afu5g04170-T|Afu2g04620-T|Afu2g14590-T|Afu2g16240-T|Afu1g15270-T|Afu6g14210-T|Afu5g02920-T|Afu4g12850-T|Afu2g17110-T|Afu1g05040-T|Afu3g08050-T|Afu3g06790-T|Afu2g00660-T|Afu1g01720-T	http://amigo.geneontology.org/cgi-bin/amigo/term_details?term=GO:0010033
cellular response to stress	Gene Ontology	GO:0033554	75	399	0.0116816	Afu4g03840-T|Afu3g02280-T|Afu1g10480-T|Afu3g08520-T|Afu5g10270-T|Afu3g03350-T|Afu5g11430-T|Afu4g11140-T|Afu4g12990-T|Afu5g09100-T|Afu6g04750-T|Afu1g17270-T|Afu4g09050-T|Afu5g07040-T|Afu5g12960-T|Afu2g13440-T|Afu7g01270-T|Afu3g14550-T|Afu1g15950-T|Afu5g11260-T|Afu4g08170-T|Afu1g02700-T|Afu1g07470-T|Afu8g04100-T|Afu2g08840-T|Afu7g01280-T|Afu7g02200-T|Afu2g16620-T|Afu4g11330-T|Afu2g04620-T|Afu1g0995…	http://amigo.geneontology.org/cgi-bin/amigo/term_details?term=GO:0033554
carbohydrate metabolic process	Gene Ontology	GO:0005975	75	400	0.0122592	Afu2g11870-T|Afu3g14620-T|Afu3g02280-T|Afu5g07080-T|Afu3g07910-T|Afu7g05610-T|Afu6g10260-T|Afu2g07590-T|Afu7g06110-T|Afu3g02090-T|Afu7g01830-T|Afu5g00670-T|Afu8g05630-T|Afu5g02280-T|Afu3g15210-T|Afu5g03530-T|Afu2g01170-T|Afu6g07070-T|Afu3g00420-T|Afu5g11100-T|Afu4g13360-T|Afu7g01320-T|Afu1g06560-T|Afu4g13230-T|Afu3g11830-T|Afu7g05140-T|Afu6g12010-T|Afu4g03900-T|Afu3g05650-T|Afu3g00320-T|Afu8g0210…	http://amigo.geneontology.org/cgi-bin/amigo/term_details?term=GO:0005975
amide transport	Gene Ontology	GO:0042886	8	19	0.0131226	Afu1g07440-T|Afu4g10000-T|Afu2g15240-T|Afu1g04870-T|Afu5g07970-T|Afu6g10630-T|Afu5g01630-T|Afu6g14210-T	http://amigo.geneontology.org/cgi-bin/amigo/term_details?term=GO:0042886
glucan biosynthetic process	Gene Ontology	GO:0009250	9	24	0.0153272	Afu2g11870-T|Afu2g04620-T|Afu3g11830-T|Afu2g07590-T|Afu7g01830-T|Afu6g12400-T|Afu8g05620-T|Afu2g01170-T|Afu1g15440-T	http://amigo.geneontology.org/cgi-bin/amigo/term_details?term=GO:0009250
DNA repair	Gene Ontology	GO:0006281	28	123	0.0162709	Afu4g03840-T|Afu1g10480-T|Afu4g11140-T|Afu7g01270-T|Afu3g14550-T|Afu1g02700-T|Afu6g14210-T|Afu7g02200-T|Afu4g08900-T|Afu2g04860-T|Afu1g06720-T|Afu3g11140-T|Afu7g05280-T|Afu2g08540-T|Afu5g06690-T|Afu2g03070-T|Afu6g13340-T|Afu6g07980-T|Afu7g01280-T|Afu1g03050-T|Afu8g05820-T|Afu6g08570-T|Afu1g11170-T|Afu4g11620-T|Afu2g08840-T|Afu4g06490-T|Afu6g07500-T|Afu6g10530-T	http://amigo.geneontology.org/cgi-bin/amigo/term_details?term=GO:0006281
disaccharide metabolic process	Gene Ontology	GO:0005984	10	29	0.0168608	Afu4g13530-T|Afu3g02280-T|Afu2g04600-T|Afu7g01830-T|Afu2g04020-T|Afu4g13230-T|Afu3g11830-T|Afu3g05650-T|Afu2g04010-T|Afu7g06370-T	http://amigo.geneontology.org/cgi-bin/amigo/term_details?term=GO:0005984
trehalose biosynthetic process	Gene Ontology	GO:0005992	6	12	0.0170128	Afu7g01830-T|Afu2g04020-T|Afu4g13230-T|Afu3g11830-T|Afu3g05650-T|Afu2g04010-T	http://amigo.geneontology.org/cgi-bin/amigo/term_details?term=GO:0005992
oligosaccharide biosynthetic process	Gene Ontology	GO:0009312	6	12	0.0170128	Afu7g01830-T|Afu2g04020-T|Afu4g13230-T|Afu3g11830-T|Afu3g05650-T|Afu2g04010-T	http://amigo.geneontology.org/cgi-bin/amigo/term_details?term=GO:0009312
disaccharide biosynthetic process	Gene Ontology	GO:0046351	6	12	0.0170128	Afu7g01830-T|Afu2g04020-T|Afu4g13230-T|Afu3g11830-T|Afu3g05650-T|Afu2g04010-T	http://amigo.geneontology.org/cgi-bin/amigo/term_details?term=GO:0046351
protein modification by small protein conjugation	Gene Ontology	GO:0032446	15	54	0.0185558	Afu5g07040-T|Afu5g12530-T|Afu1g10850-T|Afu2g17110-T|Afu1g05040-T|Afu7g04260-T|Afu5g12230-T|Afu1g02700-T|Afu5g10480-T|Afu4g06830-T|Afu4g07340-T|Afu1g12080-T|Afu6g10530-T|Afu2g11040-T|Afu6g14210-T	http://amigo.geneontology.org/cgi-bin/amigo/term_details?term=GO:0032446
cellular response to chemical stimulus	Gene Ontology	GO:0070887	62	329	0.0196721	Afu2g02260-T|Afu3g02280-T|Afu4g06820-T|Afu5g07970-T|Afu2g08800-T|Afu5g10270-T|Afu2g07590-T|Afu4g01140-T|Afu4g12990-T|Afu5g09100-T|Afu7g01280-T|Afu6g11430-T|Afu6g04750-T|Afu1g09950-T|Afu2g01170-T|Afu5g12960-T|Afu1g12310-T|Afu2g16240-T|Afu4g04280-T|Afu7g01320-T|Afu1g07470-T|Afu3g08850-T|Afu1g15950-T|Afu6g10740-T|Afu4g08170-T|Afu4g09050-T|Afu3g05650-T|Afu5g06070-T|Afu6g04360-T|Afu8g04100-T|Afu1g1544…	http://amigo.geneontology.org/cgi-bin/amigo/term_details?term=GO:0070887
superoxide metabolic process	Gene Ontology	GO:0006801	5	9	0.0213754	Afu4g12990-T|Afu1g11640-T|Afu1g14550-T|Afu6g13350-T|Afu4g11580-T	http://amigo.geneontology.org/cgi-bin/amigo/term_details?term=GO:0006801
response to osmotic stress	Gene Ontology	GO:0006970	13	45	0.0214839	Afu2g13440-T|Afu2g17170-T|Afu1g15950-T|Afu6g12410-T|Afu4g09050-T|Afu3g05650-T|Afu5g09100-T|Afu5g08480-T|Afu1g03040-T|Afu2g00660-T|Afu1g02480-T|Afu2g01170-T|Afu8g04890-T	http://amigo.geneontology.org/cgi-bin/amigo/term_details?term=GO:0006970
cell budding	Gene Ontology	GO:0007114	7	17	0.0217091	Afu4g00620-T|Afu3g08540-T|Afu5g12230-T|Afu6g04940-T|Afu6g02300-T|Afu5g10480-T|Afu6g07980-T	http://amigo.geneontology.org/cgi-bin/amigo/term_details?term=GO:0007114
response to topologically incorrect protein	Gene Ontology	GO:0035966	9	26	0.0224331	Afu5g09310-T|Afu4g12850-T|Afu2g17110-T|Afu2g04620-T|Afu5g10270-T|Afu6g04750-T|Afu1g15270-T|Afu6g14210-T|Afu1g01720-T	http://amigo.geneontology.org/cgi-bin/amigo/term_details?term=GO:0035966
transmembrane transport	Gene Ontology	GO:0055085	83	464	0.0224339	Afu8g02200-T|Afu6g13780-T|Afu1g10370-T|Afu5g10630-T|Afu6g00130-T|Afu4g10000-T|Afu2g08800-T|Afu2g16210-T|Afu8g04150-T|Afu4g03740-T|Afu4g08740-T|Afu2g15000-T|Afu2g08350-T|Afu5g01540-T|Afu4g00800-T|Afu8g02010-T|Afu2g02040-T|Afu2g08910-T|Afu5g09470-T|Afu2g00810-T|Afu5g06580-T|Afu5g06070-T|Afu2g15240-T|Afu2g07400-T|Afu5g00930-T|Afu2g05190-T|Afu3g08850-T|Afu2g05880-T|Afu1g12620-T|Afu2g08900-T|Afu1g1336…	http://amigo.geneontology.org/cgi-bin/amigo/term_details?term=GO:0055085
cellular response to stimulus	Gene Ontology	GO:0051716	118	690	0.0226428	Afu4g03840-T|Afu1g10480-T|Afu4g08170-T|Afu5g10270-T|Afu2g07590-T|Afu4g11140-T|Afu4g12990-T|Afu5g09100-T|Afu2g01170-T|Afu7g01320-T|Afu7g01270-T|Afu3g08520-T|Afu6g14210-T|Afu7g02200-T|Afu8g04100-T|Afu5g01630-T|Afu1g15440-T|Afu4g04280-T|Afu5g11260-T|Afu2g04620-T|Afu6g09930-T|Afu7g05910-T|Afu2g08540-T|Afu2g08780-T|Afu2g03070-T|Afu2g04720-T|Afu2g08840-T|Afu5g02920-T|Afu1g11170-T|Afu3g03240-T|Afu4g1162…	http://amigo.geneontology.org/cgi-bin/amigo/term_details?term=GO:0051716
cellular carbohydrate biosynthetic process	Gene Ontology	GO:0034637	15	56	0.0237286	Afu2g11870-T|Afu2g13440-T|Afu7g01830-T|Afu2g04020-T|Afu8g05630-T|Afu2g04620-T|Afu4g13230-T|Afu3g11830-T|Afu2g07590-T|Afu3g05650-T|Afu6g12400-T|Afu8g05620-T|Afu2g04010-T|Afu2g01170-T|Afu1g15440-T	http://amigo.geneontology.org/cgi-bin/amigo/term_details?term=GO:0034637
homeostatic process	Gene Ontology	GO:0042592	32	151	0.0240098	Afu6g07870-T|Afu4g04318-T|Afu4g12990-T|Afu2g00450-T|Afu2g15000-T|Afu1g17270-T|Afu2g04720-T|Afu2g01350-T|Afu3g08850-T|Afu1g10850-T|Afu3g11830-T|Afu5g11260-T|Afu2g08900-T|Afu3g11630-T|Afu5g13920-T|Afu5g04170-T|Afu1g05320-T|Afu7g06570-T|Afu2g17170-T|Afu2g14590-T|Afu4g09440-T|Afu4g12620-T|Afu2g03210-T|Afu3g12740-T|Afu6g07980-T|Afu2g16240-T|Afu5g11320-T|Afu6g14210-T|Afu2g08660-T|Afu5g07970-T|Afu4g1099…	http://amigo.geneontology.org/cgi-bin/amigo/term_details?term=GO:0042592
fungal-type cell wall beta-glucan biosynthetic process	Gene Ontology	GO:0070880	4	6	0.0258071	Afu2g04620-T|Afu2g01170-T|Afu6g12400-T|Afu8g05620-T	http://amigo.geneontology.org/cgi-bin/amigo/term_details?term=GO:0070880
positive regulation of spore-bearing organ development	Gene Ontology	GO:0075261	4	6	0.0258071	Afu1g04830-T|Afu2g00660-T|Afu6g02690-T|Afu6g13350-T	http://amigo.geneontology.org/cgi-bin/amigo/term_details?term=GO:0075261
fungal-type cell wall beta-glucan metabolic process	Gene Ontology	GO:0070879	4	6	0.0258071	Afu2g04620-T|Afu2g01170-T|Afu6g12400-T|Afu8g05620-T	http://amigo.geneontology.org/cgi-bin/amigo/term_details?term=GO:0070879
positive regulation of multicellular organismal process	Gene Ontology	GO:0051240	4	6	0.0258071	Afu1g04830-T|Afu2g00660-T|Afu6g02690-T|Afu6g13350-T	http://amigo.geneontology.org/cgi-bin/amigo/term_details?term=GO:0051240
protein refolding	Gene Ontology	GO:0042026	4	6	0.0258071	Afu2g09290-T|Afu1g15270-T|Afu1g05040-T|Afu6g10700-T	http://amigo.geneontology.org/cgi-bin/amigo/term_details?term=GO:0042026
beta-glucan metabolic process	Gene Ontology	GO:0051273	7	18	0.0270455	Afu2g11870-T|Afu2g04620-T|Afu2g07590-T|Afu7g01830-T|Afu6g12400-T|Afu8g05620-T|Afu2g01170-T	http://amigo.geneontology.org/cgi-bin/amigo/term_details?term=GO:0051273
cell wall organization or biogenesis	Gene Ontology	GO:0071554	32	153	0.0276147	Afu2g11870-T|Afu3g14620-T|Afu6g07120-T|Afu3g08520-T|Afu1g15420-T|Afu2g07590-T|Afu2g02480-T|Afu2g14600-T|Afu2g01170-T|Afu2g13440-T|Afu7g01320-T|Afu1g15950-T|Afu4g13230-T|Afu8g05630-T|Afu3g05650-T|Afu3g00320-T|Afu8g05620-T|Afu5g01190-T|Afu2g13430-T|Afu2g04620-T|Afu7g06150-T|Afu4g00620-T|Afu5g04090-T|Afu6g07890-T|Afu6g12400-T|Afu4g09940-T|Afu6g12410-T|Afu3g02090-T|Afu6g13610-T|Afu6g12210-T|Afu4g0682…	http://amigo.geneontology.org/cgi-bin/amigo/term_details?term=GO:0071554
cell wall polysaccharide metabolic process	Gene Ontology	GO:0010383	13	47	0.0279497	Afu3g14620-T|Afu2g04620-T|Afu8g05620-T|Afu8g05630-T|Afu2g13440-T|Afu6g13610-T|Afu3g02090-T|Afu3g00320-T|Afu6g12210-T|Afu6g12400-T|Afu7g06150-T|Afu5g01190-T|Afu2g01170-T	http://amigo.geneontology.org/cgi-bin/amigo/term_details?term=GO:0010383
translesion synthesis	Gene Ontology	GO:0019985	5	10	0.0288951	Afu1g02700-T|Afu2g08840-T|Afu6g14210-T|Afu6g08570-T|Afu7g01270-T	http://amigo.geneontology.org/cgi-bin/amigo/term_details?term=GO:0019985
glutamine family amino acid catabolic process	Gene Ontology	GO:0009065	5	10	0.0288951	Afu3g11430-T|Afu1g02780-T|Afu4g08170-T|Afu4g09140-T|Afu6g08760-T	http://amigo.geneontology.org/cgi-bin/amigo/term_details?term=GO:0009065
cellular response to topologically incorrect protein	Gene Ontology	GO:0035967	8	23	0.0299681	Afu5g09310-T|Afu4g12850-T|Afu2g17110-T|Afu5g10270-T|Afu6g04750-T|Afu1g15270-T|Afu6g14210-T|Afu1g01720-T	http://amigo.geneontology.org/cgi-bin/amigo/term_details?term=GO:0035967
DNA biosynthetic process	Gene Ontology	GO:0071897	9	28	0.0316279	Afu3g11140-T|Afu6g08570-T|Afu7g01270-T|Afu2g08840-T|Afu1g02700-T|Afu5g13920-T|Afu3g11630-T|Afu6g07980-T|Afu6g14210-T	http://amigo.geneontology.org/cgi-bin/amigo/term_details?term=GO:0071897
single-organism catabolic process	Gene Ontology	GO:0044712	38	192	0.033856	Afu5g08940-T|Afu8g02700-T|Afu3g02280-T|Afu6g04040-T|Afu5g08910-T|Afu4g08170-T|Afu6g10260-T|Afu6g11430-T|Afu3g11430-T|Afu5g07510-T|Afu2g10900-T|Afu5g07040-T|Afu4g09140-T|Afu4g13530-T|Afu3g11830-T|Afu4g03900-T|Afu1g15520-T|Afu8g02000-T|Afu2g10230-T|Afu8g04130-T|Afu1g05570-T|Afu2g04620-T|Afu2g11970-T|Afu4g11220-T|Afu6g08760-T|Afu6g07980-T|Afu6g14210-T|Afu2g04200-T|Afu8g06470-T|Afu2g17110-T|Afu1g0504…	http://amigo.geneontology.org/cgi-bin/amigo/term_details?term=GO:0044712
protein modification by small protein conjugation or removal	Gene Ontology	GO:0070647	18	76	0.0357362	Afu5g07040-T|Afu5g12530-T|Afu1g10850-T|Afu2g17110-T|Afu1g05040-T|Afu7g04260-T|Afu5g12230-T|Afu1g02700-T|Afu5g10480-T|Afu4g06830-T|Afu4g07340-T|Afu1g12080-T|Afu6g10530-T|Afu2g11040-T|Afu4g12910-T|Afu5g01750-T|Afu2g04720-T|Afu6g14210-T	http://amigo.geneontology.org/cgi-bin/amigo/term_details?term=GO:0070647
nitrogen utilization	Gene Ontology	GO:0019740	6	15	0.0361135	Afu5g02920-T|Afu2g15240-T|Afu7g04170-T|Afu3g08050-T|Afu2g05880-T|Afu1g15520-T	http://amigo.geneontology.org/cgi-bin/amigo/term_details?term=GO:0019740
polyamine transport	Gene Ontology	GO:0015846	4	7	0.036693	Afu1g12310-T|Afu1g04870-T|Afu5g01630-T|Afu4g01140-T	http://amigo.geneontology.org/cgi-bin/amigo/term_details?term=GO:0015846
nucleophagy	Gene Ontology	GO:0044804	5	11	0.037893	Afu2g17110-T|Afu1g07470-T|Afu2g10900-T|Afu4g09050-T|Afu6g12350-T	http://amigo.geneontology.org/cgi-bin/amigo/term_details?term=GO:0044804
piecemeal microautophagy of nucleus	Gene Ontology	GO:0034727	5	11	0.037893	Afu2g17110-T|Afu1g07470-T|Afu2g10900-T|Afu4g09050-T|Afu6g12350-T	http://amigo.geneontology.org/cgi-bin/amigo/term_details?term=GO:0034727
carbohydrate biosynthetic process	Gene Ontology	GO:0016051	16	66	0.0394232	Afu2g11870-T|Afu2g13440-T|Afu7g01830-T|Afu2g04020-T|Afu8g05630-T|Afu6g02120-T|Afu4g13230-T|Afu3g11830-T|Afu2g07590-T|Afu3g05650-T|Afu2g04620-T|Afu6g12400-T|Afu8g05620-T|Afu2g04010-T|Afu2g01170-T|Afu1g15440-T	http://amigo.geneontology.org/cgi-bin/amigo/term_details?term=GO:0016051
cell wall macromolecule metabolic process	Gene Ontology	GO:0044036	16	66	0.0394232	Afu3g14620-T|Afu1g15420-T|Afu2g04620-T|Afu8g05620-T|Afu8g05630-T|Afu2g13440-T|Afu6g13610-T|Afu3g02090-T|Afu7g01320-T|Afu3g00320-T|Afu6g12210-T|Afu6g12400-T|Afu7g06150-T|Afu5g01190-T|Afu2g14600-T|Afu2g01170-T	http://amigo.geneontology.org/cgi-bin/amigo/term_details?term=GO:0044036
telomere organization	Gene Ontology	GO:0032200	7	20	0.0402371	Afu5g04170-T|Afu1g10850-T|Afu5g13920-T|Afu2g03210-T|Afu6g07980-T|Afu3g11630-T|Afu6g14210-T	http://amigo.geneontology.org/cgi-bin/amigo/term_details?term=GO:0032200
anatomical structure homeostasis	Gene Ontology	GO:0060249	7	20	0.0402371	Afu5g04170-T|Afu1g10850-T|Afu5g13920-T|Afu2g03210-T|Afu6g07980-T|Afu3g11630-T|Afu6g14210-T	http://amigo.geneontology.org/cgi-bin/amigo/term_details?term=GO:0060249
telomere maintenance	Gene Ontology	GO:0000723	7	20	0.0402371	Afu5g04170-T|Afu1g10850-T|Afu5g13920-T|Afu2g03210-T|Afu6g07980-T|Afu3g11630-T|Afu6g14210-T	http://amigo.geneontology.org/cgi-bin/amigo/term_details?term=GO:0000723
oligosaccharide metabolic process	Gene Ontology	GO:0009311	10	35	0.0430891	Afu4g13530-T|Afu3g02280-T|Afu2g04600-T|Afu7g01830-T|Afu2g04020-T|Afu4g13230-T|Afu3g11830-T|Afu3g05650-T|Afu2g04010-T|Afu7g06370-T	http://amigo.geneontology.org/cgi-bin/amigo/term_details?term=GO:0009311
small molecule catabolic process	Gene Ontology	GO:0044282	24	113	0.0450466	Afu5g08940-T|Afu8g02700-T|Afu6g04040-T|Afu5g08910-T|Afu3g11830-T|Afu6g10260-T|Afu6g11430-T|Afu3g11430-T|Afu5g07510-T|Afu4g09140-T|Afu4g08170-T|Afu4g03900-T|Afu1g15520-T|Afu8g02000-T|Afu2g10230-T|Afu8g04130-T|Afu1g05570-T|Afu6g08760-T|Afu2g04200-T|Afu8g06470-T|Afu3g08050-T|Afu1g16270-T|Afu1g02780-T|Afu5g06680-T	http://amigo.geneontology.org/cgi-bin/amigo/term_details?term=GO:0044282
response to stimulus	Gene Ontology	GO:0050896	131	800	0.0474223	Afu4g03840-T|Afu1g10480-T|Afu8g05630-T|Afu5g10270-T|Afu2g07590-T|Afu4g11140-T|Afu4g12990-T|Afu5g09100-T|Afu2g01170-T|Afu7g01270-T|Afu3g05650-T|Afu7g01280-T|Afu7g02200-T|Afu8g04100-T|Afu5g01630-T|Afu1g15440-T|Afu4g04280-T|Afu5g11260-T|Afu7g06570-T|Afu2g17170-T|Afu6g09930-T|Afu7g05910-T|Afu2g08540-T|Afu2g17810-T|Afu2g08780-T|Afu2g03070-T|Afu2g04720-T|Afu2g08840-T|Afu5g02920-T|Afu1g11170-T|Afu3g0324…	http://amigo.geneontology.org/cgi-bin/amigo/term_details?term=GO:0050896
protein folding	Gene Ontology	GO:0006457	14	57	0.0479224	Afu1g07440-T|Afu4g12850-T|Afu5g04170-T|Afu4g10010-T|Afu2g09290-T|Afu4g11330-T|Afu1g05040-T|Afu5g10270-T|Afu5g07340-T|Afu2g11750-T|Afu6g10700-T|Afu1g15270-T|Afu2g04620-T|Afu5g13920-T	http://amigo.geneontology.org/cgi-bin/amigo/term_details?term=GO:0006457
budding cell bud growth	Gene Ontology	GO:0007117	4	8	0.0498267	Afu4g00620-T|Afu6g02300-T|Afu6g07980-T|Afu6g04940-T	http://amigo.geneontology.org/cgi-bin/amigo/term_details?term=GO:0007117
oligopeptide transport	Gene Ontology	GO:0006857	4	8	0.0498267	Afu4g10000-T|Afu2g15240-T|Afu5g07970-T|Afu6g14210-T	http://amigo.geneontology.org/cgi-bin/amigo/term_details?term=GO:0006857
proline metabolic process	Gene Ontology	GO:0006560	4	8	0.0498267	Afu3g11430-T|Afu6g08750-T|Afu4g09140-T|Afu6g08760-T	http://amigo.geneontology.org/cgi-bin/amigo/term_details?term=GO:0006560
negative regulation of meiotic nuclear division	Gene Ontology	GO:0045835	4	8	0.0498267	Afu5g07950-T|Afu1g03050-T|Afu2g03810-T|Afu2g14590-T	http://amigo.geneontology.org/cgi-bin/amigo/term_details?term=GO:0045835

## Sheet: GO down wt HS 15' vs wt 30ºC
#Term	Database	ID	Input number	Background number	P-Value	Input	Hyperlink
ribosome biogenesis	Gene Ontology	GO:0042254	107	144	6.64081e-31	Afu2g06310-T|Afu1g04320-T|Afu6g06430-T|Afu6g01990-T|Afu2g01480-T|Afu2g03590-T|Afu6g04570-T|Afu1g11130-T|Afu1g13070-T|Afu7g04430-T|Afu5g06510-T|Afu2g16750-T|Afu5g13470-T|Afu4g05880-T|Afu2g05950-T|Afu2g02150-T|Afu3g11110-T|Afu1g16730-T|Afu6g10320-T|Afu2g13570-T|Afu1g04240-T|Afu7g04860-T|Afu1g10990-T|Afu3g12490-T|Afu4g08190-T|Afu6g04330-T|Afu6g09820-T|Afu7g01460-T|Afu6g12920-T|Afu3g09600-T|Afu3g0988…	http://amigo.geneontology.org/cgi-bin/amigo/term_details?term=GO:0042254
ribonucleoprotein complex biogenesis	Gene Ontology	GO:0022613	107	161	5.58738e-28	Afu2g06310-T|Afu1g04320-T|Afu6g06430-T|Afu6g01990-T|Afu2g01480-T|Afu2g03590-T|Afu6g04570-T|Afu1g11130-T|Afu1g13070-T|Afu7g04430-T|Afu5g06510-T|Afu2g16750-T|Afu5g13470-T|Afu4g05880-T|Afu2g05950-T|Afu2g02150-T|Afu3g11110-T|Afu1g16730-T|Afu6g10320-T|Afu2g13570-T|Afu1g04240-T|Afu7g04860-T|Afu1g10990-T|Afu3g12490-T|Afu4g08190-T|Afu6g04330-T|Afu6g09820-T|Afu7g01460-T|Afu6g12920-T|Afu3g09600-T|Afu3g0988…	http://amigo.geneontology.org/cgi-bin/amigo/term_details?term=GO:0022613
rRNA processing	Gene Ontology	GO:0006364	71	98	2.06717e-20	Afu2g06310-T|Afu2g17060-T|Afu1g14580-T|Afu5g03870-T|Afu7g02140-T|Afu6g06430-T|Afu6g08900-T|Afu7g04490-T|Afu3g06010-T|Afu5g05450-T|Afu2g04800-T|Afu6g01990-T|Afu3g09880-T|Afu8g04220-T|Afu2g13980-T|Afu4g07570-T|Afu2g03590-T|Afu5g05710-T|Afu3g06640-T|Afu2g13130-T|Afu4g13450-T|Afu7g02210-T|Afu8g03930-T|Afu7g04430-T|Afu3g06580-T|Afu2g11510-T|Afu1g04840-T|Afu2g08320-T|Afu5g12100-T|Afu1g09440-T|Afu6g0426…	http://amigo.geneontology.org/cgi-bin/amigo/term_details?term=GO:0006364
rRNA metabolic process	Gene Ontology	GO:0016072	72	103	4.70436e-20	Afu2g06310-T|Afu2g09200-T|Afu2g17060-T|Afu1g14580-T|Afu5g03870-T|Afu7g02140-T|Afu6g06430-T|Afu6g08900-T|Afu7g04490-T|Afu3g06010-T|Afu5g05450-T|Afu2g04800-T|Afu6g01990-T|Afu3g09880-T|Afu8g04220-T|Afu2g13980-T|Afu4g07570-T|Afu2g03590-T|Afu5g05710-T|Afu3g06640-T|Afu2g13130-T|Afu4g13450-T|Afu7g02210-T|Afu8g03930-T|Afu7g04430-T|Afu3g06580-T|Afu2g11510-T|Afu1g04840-T|Afu2g08320-T|Afu5g12100-T|Afu1g0944…	http://amigo.geneontology.org/cgi-bin/amigo/term_details?term=GO:0016072
ncRNA processing	Gene Ontology	GO:0034470	84	150	1.06156e-18	Afu2g06310-T|Afu1g07570-T|Afu1g14580-T|Afu5g03870-T|Afu7g02140-T|Afu6g06430-T|Afu6g08900-T|Afu7g04490-T|Afu2g16360-T|Afu4g04260-T|Afu5g05450-T|Afu2g04800-T|Afu6g01990-T|Afu3g09880-T|Afu2g17060-T|Afu8g04220-T|Afu2g13980-T|Afu4g07570-T|Afu2g03590-T|Afu5g05710-T|Afu1g14630-T|Afu2g15980-T|Afu3g06640-T|Afu2g13130-T|Afu4g13450-T|Afu7g02210-T|Afu8g03930-T|Afu7g04430-T|Afu3g06580-T|Afu6g13370-T|Afu2g1151…	http://amigo.geneontology.org/cgi-bin/amigo/term_details?term=GO:0034470
ncRNA metabolic process	Gene Ontology	GO:0034660	97	197	1.76688e-18	Afu2g06310-T|Afu1g04320-T|Afu8g00100-T|Afu6g06430-T|Afu8g04800-T|Afu4g04260-T|Afu6g01990-T|Afu2g03590-T|Afu1g16210-T|Afu1g13070-T|Afu7g04430-T|Afu1g14180-T|Afu5g13470-T|Afu1g04840-T|Afu4g05880-T|Afu7g03690-T|Afu6g04510-T|Afu2g05950-T|Afu3g11110-T|Afu1g16730-T|Afu2g08320-T|Afu7g04860-T|Afu1g10990-T|Afu6g04330-T|Afu6g09820-T|Afu3g09600-T|Afu1g07570-T|Afu4g07570-T|Afu6g08900-T|Afu5g12100-T|Afu2g1636…	http://amigo.geneontology.org/cgi-bin/amigo/term_details?term=GO:0034660
nitrogen compound metabolic process	Gene Ontology	GO:0006807	374	1523	1.24284e-17	Afu2g06310-T|Afu5g02930-T|Afu8g01240-T|Afu2g01030-T|Afu2g16370-T|Afu6g04570-T|Afu4g07845-T|Afu5g05690-T|Afu1g03110-T|Afu4g13170-T|Afu1g02800-T|Afu5g13470-T|Afu5g02760-T|Afu4g08110-T|Afu6g04510-T|Afu4g08410-T|Afu3g11110-T|Afu8g04050-T|Afu7g04860-T|Afu1g04040-T|Afu1g15620-T|Afu1g06340-T|Afu5g11985-T|Afu3g09600-T|Afu4g04270-T|Afu1g12490-T|Afu6g01990-T|Afu2g03700-T|Afu5g07270-T|Afu4g10620-T|Afu5g0945…	http://amigo.geneontology.org/cgi-bin/amigo/term_details?term=GO:0006807
organonitrogen compound biosynthetic process	Gene Ontology	GO:1901566	161	482	1.9231e-16	Afu8g00420-T|Afu8g04340-T|Afu8g00100-T|Afu6g11620-T|Afu8g04800-T|Afu7g05460-T|Afu4g04260-T|Afu2g11290-T|Afu3g08650-T|Afu2g16370-T|Afu2g03590-T|Afu6g11260-T|Afu1g16210-T|Afu6g04570-T|Afu1g11130-T|Afu4g07845-T|Afu4g06690-T|Afu2g07680-T|Afu2g03610-T|Afu5g05690-T|Afu1g03110-T|Afu4g13170-T|Afu3g13120-T|Afu5g02760-T|Afu6g12060-T|Afu6g12580-T|Afu4g08110-T|Afu4g08010-T|Afu1g09330-T|Afu5g03140-T|Afu7g0398…	http://amigo.geneontology.org/cgi-bin/amigo/term_details?term=GO:1901566
cellular component biogenesis	Gene Ontology	GO:0044085	151	464	1.10516e-14	Afu2g06310-T|Afu1g04320-T|Afu6g06430-T|Afu8g04800-T|Afu6g01990-T|Afu5g06010-T|Afu7g01400-T|Afu2g03590-T|Afu4g07460-T|Afu3g14010-T|Afu6g04570-T|Afu1g11130-T|Afu1g13070-T|Afu2g03870-T|Afu3g06330-T|Afu5g06510-T|Afu2g16750-T|Afu4g13170-T|Afu5g13470-T|Afu4g05880-T|Afu1g02550-T|Afu2g05950-T|Afu3g11360-T|Afu2g02150-T|Afu3g11110-T|Afu1g16730-T|Afu6g10320-T|Afu6g08660-T|Afu2g13570-T|Afu2g09060-T|Afu1g1294…	http://amigo.geneontology.org/cgi-bin/amigo/term_details?term=GO:0044085
cellular nitrogen compound metabolic process	Gene Ontology	GO:0034641	323	1326	1.26304e-14	Afu2g06310-T|Afu1g13500-T|Afu8g00420-T|Afu8g00230-T|Afu3g07680-T|Afu8g00100-T|Afu1g04320-T|Afu8g01240-T|Afu8g04800-T|Afu3g06010-T|Afu7g05460-T|Afu3g01155-T|Afu4g04260-T|Afu2g11290-T|Afu3g08650-T|Afu7g04811-T|Afu8g01780-T|Afu4g14590-T|Afu1g15120-T|Afu3g02480-T|Afu8g04050-T|Afu6g11260-T|Afu1g16210-T|Afu5g06560-T|Afu6g04570-T|Afu5g04330-T|Afu4g07845-T|Afu7g04430-T|Afu4g06690-T|Afu6g11750-T|Afu3g1401…	http://amigo.geneontology.org/cgi-bin/amigo/term_details?term=GO:0034641
RNA processing	Gene Ontology	GO:0006396	94	223	1.28708e-14	Afu2g06310-T|Afu6g06430-T|Afu4g04260-T|Afu6g01990-T|Afu2g03590-T|Afu1g13070-T|Afu7g04430-T|Afu1g14180-T|Afu5g13470-T|Afu4g05880-T|Afu7g03690-T|Afu6g04510-T|Afu2g05950-T|Afu3g11110-T|Afu1g16730-T|Afu1g04240-T|Afu7g04860-T|Afu1g10990-T|Afu6g04330-T|Afu6g09820-T|Afu1g15620-T|Afu7g04280-T|Afu3g09600-T|Afu1g07570-T|Afu4g07570-T|Afu6g08900-T|Afu6g10370-T|Afu5g12100-T|Afu2g16360-T|Afu8g04220-T|Afu7g0413…	http://amigo.geneontology.org/cgi-bin/amigo/term_details?term=GO:0006396
ribosomal small subunit biogenesis	Gene Ontology	GO:0042274	41	50	1.41392e-13	Afu7g02140-T|Afu6g06430-T|Afu1g05340-T|Afu5g05450-T|Afu2g04800-T|Afu8g04220-T|Afu2g10440-T|Afu2g03590-T|Afu3g06640-T|Afu7g02210-T|Afu7g04430-T|Afu7g04490-T|Afu1g04840-T|Afu3g09340-T|Afu6g04590-T|Afu4g05880-T|Afu6g13370-T|Afu3g04110-T|Afu1g09440-T|Afu2g05950-T|Afu2g12890-T|Afu2g10500-T|Afu1g13070-T|Afu3g11110-T|Afu4g10800-T|Afu3g13400-T|Afu3g11260-T|Afu3g06010-T|Afu5g06520-T|Afu1g05310-T|Afu2g0832…	http://amigo.geneontology.org/cgi-bin/amigo/term_details?term=GO:0042274
organonitrogen compound metabolic process	Gene Ontology	GO:1901564	192	683	2.94741e-13	Afu1g13500-T|Afu8g00420-T|Afu5g02930-T|Afu8g00100-T|Afu6g11620-T|Afu2g01030-T|Afu7g05460-T|Afu3g12120-T|Afu4g04260-T|Afu2g11290-T|Afu3g08650-T|Afu2g16370-T|Afu6g10810-T|Afu2g03590-T|Afu6g11260-T|Afu1g16210-T|Afu6g04570-T|Afu5g04330-T|Afu4g07845-T|Afu4g06690-T|Afu2g07680-T|Afu2g03610-T|Afu5g05690-T|Afu1g03110-T|Afu4g13170-T|Afu3g13120-T|Afu3g09320-T|Afu5g02760-T|Afu6g12060-T|Afu6g12580-T|Afu3g1128…	http://amigo.geneontology.org/cgi-bin/amigo/term_details?term=GO:1901564
translation	Gene Ontology	GO:0006412	75	172	1.78645e-12	Afu1g05200-T|Afu1g15730-T|Afu4g07730-T|Afu1g06520-T|Afu8g00100-T|Afu1g06390-T|Afu7g02140-T|Afu1g04320-T|Afu8g04800-T|Afu1g05340-T|Afu7g05460-T|Afu1g06340-T|Afu5g05450-T|Afu5g03020-T|Afu1g09100-T|Afu3g08640-T|Afu2g16370-T|Afu4g07435-T|Afu1g04530-T|Afu2g03590-T|Afu2g10100-T|Afu6g11260-T|Afu3g06640-T|Afu1g05990-T|Afu6g04570-T|Afu1g11130-T|Afu4g07845-T|Afu8g03930-T|Afu2g13530-T|Afu7g04490-T|Afu1g0397…	http://amigo.geneontology.org/cgi-bin/amigo/term_details?term=GO:0006412
ribosomal large subunit biogenesis	Gene Ontology	GO:0042273	37	46	3.27242e-12	Afu2g06310-T|Afu2g17060-T|Afu5g03870-T|Afu6g08900-T|Afu5g12100-T|Afu1g01990-T|Afu2g08480-T|Afu6g01990-T|Afu5g06010-T|Afu2g13980-T|Afu2g09210-T|Afu3g06580-T|Afu2g01480-T|Afu1g11130-T|Afu7g04430-T|Afu8g04790-T|Afu5g06510-T|Afu2g11510-T|Afu4g07630-T|Afu5g13470-T|Afu1g04040-T|Afu6g04260-T|Afu1g09200-T|Afu5g05930-T|Afu5g12270-T|Afu1g06230-T|Afu1g05080-T|Afu1g10760-T|Afu3g13280-T|Afu6g07080-T|Afu1g1633…	http://amigo.geneontology.org/cgi-bin/amigo/term_details?term=GO:0042273
cellular metabolic process	Gene Ontology	GO:0044237	462	2202	1.27272e-11	Afu2g06310-T|Afu8g06080-T|Afu5g02930-T|Afu8g01240-T|Afu4g13960-T|Afu1g08810-T|Afu2g16370-T|Afu6g04570-T|Afu4g07845-T|Afu1g11530-T|Afu5g05690-T|Afu6g03980-T|Afu1g03110-T|Afu4g13170-T|Afu5g13470-T|Afu5g02760-T|Afu4g08110-T|Afu6g04510-T|Afu4g08410-T|Afu3g11110-T|Afu7g02130-T|Afu2g09060-T|Afu7g04860-T|Afu1g04040-T|Afu1g15620-T|Afu1g06340-T|Afu5g11985-T|Afu3g09600-T|Afu4g04270-T|Afu1g12490-T|Afu6g0710…	http://amigo.geneontology.org/cgi-bin/amigo/term_details?term=GO:0044237
maturation of SSU-rRNA	Gene Ontology	GO:0030490	34	41	1.38958e-11	Afu7g02140-T|Afu6g06430-T|Afu5g05450-T|Afu2g04800-T|Afu8g04220-T|Afu2g10440-T|Afu2g03590-T|Afu3g06640-T|Afu1g04320-T|Afu7g04430-T|Afu7g04490-T|Afu1g04840-T|Afu3g09340-T|Afu6g04590-T|Afu4g05880-T|Afu6g13370-T|Afu3g04110-T|Afu1g09440-T|Afu2g05950-T|Afu2g02150-T|Afu2g10500-T|Afu3g11110-T|Afu3g13400-T|Afu3g11260-T|Afu3g06010-T|Afu2g12890-T|Afu1g04240-T|Afu7g04860-T|Afu6g14260-T|Afu6g04330-T|Afu3g1332…	http://amigo.geneontology.org/cgi-bin/amigo/term_details?term=GO:0030490
cellular aromatic compound metabolic process	Gene Ontology	GO:0006725	279	1181	2.73198e-11	Afu2g06310-T|Afu8g06080-T|Afu8g00230-T|Afu3g07680-T|Afu8g00100-T|Afu1g04320-T|Afu8g01240-T|Afu8g04800-T|Afu8g00420-T|Afu3g06010-T|Afu3g01155-T|Afu4g04260-T|Afu2g11290-T|Afu3g08650-T|Afu7g04811-T|Afu1g15120-T|Afu6g10810-T|Afu3g02480-T|Afu8g04050-T|Afu1g14220-T|Afu1g16210-T|Afu5g06560-T|Afu6g04570-T|Afu2g13470-T|Afu1g13070-T|Afu7g04430-T|Afu1g11530-T|Afu6g11750-T|Afu3g14010-T|Afu2g03610-T|Afu5g0569…	http://amigo.geneontology.org/cgi-bin/amigo/term_details?term=GO:0006725
maturation of SSU-rRNA from tricistronic rRNA transcript (SSU-rRNA, 5.8S rRNA, LSU-rRNA)	Gene Ontology	GO:0000462	31	36	5.78339e-11	Afu7g02140-T|Afu6g06430-T|Afu5g05450-T|Afu2g04800-T|Afu8g04220-T|Afu2g10440-T|Afu2g03590-T|Afu3g06640-T|Afu1g04320-T|Afu7g04430-T|Afu1g04840-T|Afu1g04240-T|Afu6g04590-T|Afu4g05880-T|Afu6g13370-T|Afu3g04110-T|Afu1g09440-T|Afu2g05950-T|Afu2g02150-T|Afu2g10500-T|Afu3g11110-T|Afu3g13400-T|Afu3g06010-T|Afu2g12890-T|Afu7g04860-T|Afu6g14260-T|Afu6g04330-T|Afu3g13320-T|Afu6g09820-T|Afu4g13330-T|Afu4g1080…	http://amigo.geneontology.org/cgi-bin/amigo/term_details?term=GO:0000462
organic cyclic compound metabolic process	Gene Ontology	GO:1901360	292	1269	1.03525e-10	Afu2g06310-T|Afu8g06080-T|Afu8g00230-T|Afu3g07680-T|Afu8g00100-T|Afu1g04320-T|Afu8g01240-T|Afu8g04800-T|Afu8g00420-T|Afu3g06010-T|Afu3g01155-T|Afu4g04260-T|Afu2g11290-T|Afu3g08650-T|Afu7g04811-T|Afu1g15120-T|Afu6g10810-T|Afu3g02480-T|Afu8g04050-T|Afu1g14220-T|Afu1g16210-T|Afu5g06560-T|Afu6g04570-T|Afu2g13470-T|Afu1g13070-T|Afu7g04430-T|Afu4g06690-T|Afu6g11750-T|Afu3g14010-T|Afu2g03610-T|Afu5g0569…	http://amigo.geneontology.org/cgi-bin/amigo/term_details?term=GO:1901360
amide biosynthetic process	Gene Ontology	GO:0043604	85	235	1.52167e-10	Afu1g05200-T|Afu1g15730-T|Afu8g00420-T|Afu4g07730-T|Afu1g06520-T|Afu5g03020-T|Afu1g06390-T|Afu1g13140-T|Afu1g04320-T|Afu8g04800-T|Afu4g07660-T|Afu1g05340-T|Afu7g05460-T|Afu1g06340-T|Afu5g05450-T|Afu3g08650-T|Afu1g09100-T|Afu4g07435-T|Afu6g10460-T|Afu2g16370-T|Afu5g06610-T|Afu8g00100-T|Afu1g04530-T|Afu2g03590-T|Afu2g10100-T|Afu6g11260-T|Afu3g06640-T|Afu1g05990-T|Afu6g04570-T|Afu1g11130-T|Afu4g0784…	http://amigo.geneontology.org/cgi-bin/amigo/term_details?term=GO:0043604
peptide biosynthetic process	Gene Ontology	GO:0043043	80	216	2.16187e-10	Afu1g05200-T|Afu1g15730-T|Afu4g07730-T|Afu1g06520-T|Afu8g00100-T|Afu1g06390-T|Afu7g02140-T|Afu1g04320-T|Afu8g04800-T|Afu4g07660-T|Afu1g05340-T|Afu7g05460-T|Afu1g06340-T|Afu5g05450-T|Afu5g03020-T|Afu1g09100-T|Afu3g08640-T|Afu2g16370-T|Afu5g06610-T|Afu4g07435-T|Afu1g04530-T|Afu2g03590-T|Afu2g10100-T|Afu6g11260-T|Afu3g06640-T|Afu1g05990-T|Afu6g04570-T|Afu1g11130-T|Afu4g07845-T|Afu8g03930-T|Afu2g1353…	http://amigo.geneontology.org/cgi-bin/amigo/term_details?term=GO:0043043
nucleobase-containing compound metabolic process	Gene Ontology	GO:0006139	250	1053	2.55986e-10	Afu2g06310-T|Afu8g00420-T|Afu6g11620-T|Afu3g07680-T|Afu8g00100-T|Afu1g04320-T|Afu8g01240-T|Afu8g04800-T|Afu3g06010-T|Afu3g01155-T|Afu4g04260-T|Afu2g11290-T|Afu3g08650-T|Afu7g04811-T|Afu1g15120-T|Afu3g02480-T|Afu8g04050-T|Afu1g16210-T|Afu5g06560-T|Afu6g04570-T|Afu2g13470-T|Afu1g13070-T|Afu7g04430-T|Afu4g06690-T|Afu6g11750-T|Afu3g14010-T|Afu2g03610-T|Afu2g12250-T|Afu6g06430-T|Afu1g14180-T|Afu5g1347…	http://amigo.geneontology.org/cgi-bin/amigo/term_details?term=GO:0006139
gene expression	Gene Ontology	GO:0010467	217	886	5.10198e-10	Afu2g06310-T|Afu8g00420-T|Afu3g07680-T|Afu8g00100-T|Afu8g01240-T|Afu8g04800-T|Afu3g06010-T|Afu7g05460-T|Afu4g04260-T|Afu7g04811-T|Afu2g16370-T|Afu3g02480-T|Afu8g04050-T|Afu6g11260-T|Afu1g16210-T|Afu6g04570-T|Afu1g11130-T|Afu4g07845-T|Afu7g04430-T|Afu6g11750-T|Afu1g03110-T|Afu6g06430-T|Afu4g13170-T|Afu1g14180-T|Afu5g13470-T|Afu1g04840-T|Afu4g05880-T|Afu4g08110-T|Afu7g03690-T|Afu6g04510-T|Afu2g0595…	http://amigo.geneontology.org/cgi-bin/amigo/term_details?term=GO:0010467
ribosome assembly	Gene Ontology	GO:0042255	28	34	9.85714e-10	Afu5g06010-T|Afu4g07570-T|Afu1g01990-T|Afu2g08480-T|Afu6g01990-T|Afu2g10440-T|Afu2g09210-T|Afu3g06580-T|Afu3g06640-T|Afu1g11130-T|Afu7g02210-T|Afu7g04430-T|Afu7g04490-T|Afu5g06510-T|Afu1g04840-T|Afu5g13520-T|Afu5g13470-T|Afu1g04040-T|Afu5g05930-T|Afu1g06230-T|Afu1g05080-T|Afu3g11260-T|Afu3g13280-T|Afu4g07730-T|Afu3g13320-T|Afu8g04790-T|Afu1g10760-T|Afu2g11850-T	http://amigo.geneontology.org/cgi-bin/amigo/term_details?term=GO:0042255
cellular biosynthetic process	Gene Ontology	GO:0044249	291	1301	1.52841e-09	Afu8g06080-T|Afu6g11620-T|Afu3g07680-T|Afu8g00100-T|Afu8g01240-T|Afu4g13960-T|Afu8g04800-T|Afu8g00420-T|Afu7g05460-T|Afu3g01155-T|Afu1g06340-T|Afu2g11290-T|Afu3g08650-T|Afu7g04811-T|Afu2g16370-T|Afu3g02480-T|Afu6g11260-T|Afu1g16210-T|Afu6g04570-T|Afu2g11300-T|Afu4g07845-T|Afu1g14140-T|Afu4g06690-T|Afu6g11750-T|Afu3g14010-T|Afu2g03610-T|Afu5g05690-T|Afu2g12250-T|Afu1g03110-T|Afu4g11500-T|Afu4g1317…	http://amigo.geneontology.org/cgi-bin/amigo/term_details?term=GO:0044249
peptide metabolic process	Gene Ontology	GO:0006518	81	232	1.59762e-09	Afu1g05200-T|Afu1g15730-T|Afu1g11130-T|Afu1g06520-T|Afu8g00100-T|Afu1g06390-T|Afu7g02140-T|Afu1g04320-T|Afu8g04800-T|Afu4g07730-T|Afu4g07660-T|Afu1g05340-T|Afu7g05460-T|Afu1g06340-T|Afu5g05450-T|Afu5g03020-T|Afu1g09100-T|Afu3g08640-T|Afu2g16370-T|Afu5g06610-T|Afu4g07435-T|Afu1g04530-T|Afu2g03590-T|Afu2g10100-T|Afu6g11260-T|Afu3g06640-T|Afu1g05990-T|Afu6g04570-T|Afu5g04330-T|Afu4g07845-T|Afu8g0393…	http://amigo.geneontology.org/cgi-bin/amigo/term_details?term=GO:0006518
heterocycle metabolic process	Gene Ontology	GO:0046483	270	1190	2.16091e-09	Afu2g06310-T|Afu8g06080-T|Afu8g00230-T|Afu3g07680-T|Afu8g00100-T|Afu1g04320-T|Afu8g01240-T|Afu8g04800-T|Afu8g00420-T|Afu3g06010-T|Afu3g01155-T|Afu4g04260-T|Afu2g11290-T|Afu3g08650-T|Afu7g04811-T|Afu1g15120-T|Afu3g02480-T|Afu8g04050-T|Afu1g16210-T|Afu5g06560-T|Afu6g04570-T|Afu2g13470-T|Afu1g13070-T|Afu7g04430-T|Afu4g06690-T|Afu6g11750-T|Afu3g14010-T|Afu2g03610-T|Afu2g12250-T|Afu6g06430-T|Afu1g1418…	http://amigo.geneontology.org/cgi-bin/amigo/term_details?term=GO:0046483
organic substance biosynthetic process	Gene Ontology	GO:1901576	292	1314	2.54117e-09	Afu8g06080-T|Afu6g11620-T|Afu3g07680-T|Afu8g00100-T|Afu8g01240-T|Afu4g13960-T|Afu8g04800-T|Afu8g00420-T|Afu7g05460-T|Afu3g01155-T|Afu1g06340-T|Afu2g11290-T|Afu3g08650-T|Afu7g04811-T|Afu2g16370-T|Afu3g02480-T|Afu6g11260-T|Afu1g16210-T|Afu6g04570-T|Afu2g11300-T|Afu4g07845-T|Afu1g14140-T|Afu4g06690-T|Afu6g11750-T|Afu3g14010-T|Afu2g03610-T|Afu5g05690-T|Afu2g12250-T|Afu1g03110-T|Afu4g11500-T|Afu4g1317…	http://amigo.geneontology.org/cgi-bin/amigo/term_details?term=GO:1901576
cellular amide metabolic process	Gene Ontology	GO:0043603	88	271	5.64189e-09	Afu8g00420-T|Afu3g12120-T|Afu8g00100-T|Afu8g04800-T|Afu7g05460-T|Afu1g06340-T|Afu3g08650-T|Afu2g16370-T|Afu2g03590-T|Afu6g11260-T|Afu1g16210-T|Afu6g04570-T|Afu1g11130-T|Afu4g07845-T|Afu1g03110-T|Afu4g13170-T|Afu3g08640-T|Afu4g08110-T|Afu1g09330-T|Afu7g03980-T|Afu4g03860-T|Afu4g07820-T|Afu1g12940-T|Afu4g07660-T|Afu1g06830-T|Afu7g01460-T|Afu5g11985-T|Afu1g05200-T|Afu1g15730-T|Afu1g12490-T|Afu5g0549…	http://amigo.geneontology.org/cgi-bin/amigo/term_details?term=GO:0043603
cellular process	Gene Ontology	GO:0009987	548	2833	7.84646e-09	Afu2g06310-T|Afu8g06080-T|Afu5g02930-T|Afu8g01240-T|Afu4g13960-T|Afu1g08810-T|Afu2g03150-T|Afu2g16370-T|Afu7g01400-T|Afu6g04570-T|Afu4g07845-T|Afu1g11530-T|Afu5g06510-T|Afu5g05690-T|Afu6g03980-T|Afu1g03110-T|Afu4g13170-T|Afu5g13470-T|Afu5g02760-T|Afu2g15980-T|Afu1g02550-T|Afu4g08110-T|Afu6g04510-T|Afu1g06880-T|Afu2g01660-T|Afu3g11110-T|Afu7g02130-T|Afu6g08660-T|Afu2g09060-T|Afu5g14070-T|Afu7g0486…	http://amigo.geneontology.org/cgi-bin/amigo/term_details?term=GO:0009987
organic substance metabolic process	Gene Ontology	GO:0071704	481	2433	9.91008e-09	Afu2g06310-T|Afu8g06080-T|Afu5g02930-T|Afu8g01240-T|Afu4g13960-T|Afu2g01030-T|Afu1g08810-T|Afu2g16370-T|Afu6g04570-T|Afu4g07845-T|Afu5g05690-T|Afu6g03980-T|Afu1g03110-T|Afu4g13170-T|Afu5g01870-T|Afu5g13470-T|Afu5g02760-T|Afu4g08110-T|Afu6g04510-T|Afu4g08410-T|Afu3g11110-T|Afu7g02130-T|Afu2g09060-T|Afu7g04860-T|Afu1g04040-T|Afu1g15620-T|Afu1g06340-T|Afu5g11985-T|Afu3g09600-T|Afu4g04270-T|Afu1g1249…	http://amigo.geneontology.org/cgi-bin/amigo/term_details?term=GO:0071704
biosynthetic process	Gene Ontology	GO:0009058	300	1382	1.16227e-08	Afu8g06080-T|Afu6g11620-T|Afu3g07680-T|Afu8g00100-T|Afu8g01240-T|Afu4g13960-T|Afu8g04800-T|Afu8g00420-T|Afu7g05460-T|Afu3g01155-T|Afu1g06340-T|Afu2g11290-T|Afu3g08650-T|Afu7g04811-T|Afu1g15730-T|Afu2g16370-T|Afu3g02480-T|Afu6g11260-T|Afu1g16210-T|Afu6g04570-T|Afu2g11300-T|Afu4g07845-T|Afu1g14140-T|Afu4g06690-T|Afu6g11750-T|Afu3g14010-T|Afu2g03610-T|Afu5g05690-T|Afu2g12250-T|Afu1g03110-T|Afu4g1150…	http://amigo.geneontology.org/cgi-bin/amigo/term_details?term=GO:0009058
primary metabolic process	Gene Ontology	GO:0044238	431	2162	3.88506e-08	Afu2g06310-T|Afu5g02930-T|Afu8g01240-T|Afu2g16370-T|Afu6g04570-T|Afu4g07845-T|Afu5g05690-T|Afu6g03980-T|Afu1g03110-T|Afu4g13170-T|Afu5g01870-T|Afu5g13470-T|Afu5g02760-T|Afu4g08110-T|Afu6g04510-T|Afu4g08410-T|Afu3g11110-T|Afu7g02130-T|Afu2g09060-T|Afu7g04860-T|Afu1g04040-T|Afu1g15620-T|Afu1g06340-T|Afu5g11985-T|Afu3g09600-T|Afu4g04270-T|Afu1g12490-T|Afu6g07100-T|Afu6g01990-T|Afu2g03700-T|Afu5g0727…	http://amigo.geneontology.org/cgi-bin/amigo/term_details?term=GO:0044238
maturation of 5.8S rRNA from tricistronic rRNA transcript (SSU-rRNA, 5.8S rRNA, LSU-rRNA)	Gene Ontology	GO:0000466	26	38	5.74091e-08	Afu2g06310-T|Afu3g09880-T|Afu5g03870-T|Afu6g06430-T|Afu6g08900-T|Afu5g12100-T|Afu5g06010-T|Afu8g04220-T|Afu4g07570-T|Afu2g03590-T|Afu2g13130-T|Afu7g04430-T|Afu8g04790-T|Afu1g04840-T|Afu1g04240-T|Afu6g04260-T|Afu4g05880-T|Afu6g13370-T|Afu3g04110-T|Afu5g05930-T|Afu3g11110-T|Afu3g13400-T|Afu3g06010-T|Afu2g12890-T|Afu6g14260-T|Afu3g13320-T	http://amigo.geneontology.org/cgi-bin/amigo/term_details?term=GO:0000466
maturation of 5.8S rRNA	Gene Ontology	GO:0000460	26	38	5.74091e-08	Afu2g06310-T|Afu3g09880-T|Afu5g03870-T|Afu6g06430-T|Afu6g08900-T|Afu5g12100-T|Afu5g06010-T|Afu8g04220-T|Afu4g07570-T|Afu2g03590-T|Afu2g13130-T|Afu7g04430-T|Afu8g04790-T|Afu1g04840-T|Afu1g04240-T|Afu6g04260-T|Afu4g05880-T|Afu6g13370-T|Afu3g04110-T|Afu5g05930-T|Afu3g11110-T|Afu3g13400-T|Afu3g06010-T|Afu2g12890-T|Afu6g14260-T|Afu3g13320-T	http://amigo.geneontology.org/cgi-bin/amigo/term_details?term=GO:0000460
nucleic acid metabolic process	Gene Ontology	GO:0090304	206	887	5.75253e-08	Afu2g06310-T|Afu8g00420-T|Afu3g07680-T|Afu8g00100-T|Afu1g04320-T|Afu8g01240-T|Afu8g04800-T|Afu3g06010-T|Afu3g01155-T|Afu4g04260-T|Afu7g02620-T|Afu1g15120-T|Afu3g02480-T|Afu8g04050-T|Afu1g16210-T|Afu5g06560-T|Afu6g04570-T|Afu1g13070-T|Afu7g04430-T|Afu4g06690-T|Afu6g11750-T|Afu3g14010-T|Afu2g08480-T|Afu2g12250-T|Afu6g06430-T|Afu1g14180-T|Afu5g13470-T|Afu1g04840-T|Afu2g01980-T|Afu4g05880-T|Afu7g0369…	http://amigo.geneontology.org/cgi-bin/amigo/term_details?term=GO:0090304
ribonucleoprotein complex assembly	Gene Ontology	GO:0022618	31	56	1.15974e-07	Afu2g17060-T|Afu4g07570-T|Afu1g01990-T|Afu2g08480-T|Afu6g01990-T|Afu5g06010-T|Afu2g10440-T|Afu2g09210-T|Afu3g06580-T|Afu3g06640-T|Afu1g11130-T|Afu7g02210-T|Afu7g04430-T|Afu7g04490-T|Afu5g06510-T|Afu2g11510-T|Afu1g04840-T|Afu5g13520-T|Afu5g13470-T|Afu1g04040-T|Afu5g05930-T|Afu1g06230-T|Afu1g05080-T|Afu3g11260-T|Afu3g13280-T|Afu4g07730-T|Afu3g13320-T|Afu8g04790-T|Afu1g10760-T|Afu2g11850-T|Afu5g0176…	http://amigo.geneontology.org/cgi-bin/amigo/term_details?term=GO:0022618
ribonucleoprotein complex subunit organization	Gene Ontology	GO:0071826	31	57	1.56367e-07	Afu2g17060-T|Afu4g07570-T|Afu1g01990-T|Afu2g08480-T|Afu6g01990-T|Afu5g06010-T|Afu2g10440-T|Afu2g09210-T|Afu3g06580-T|Afu3g06640-T|Afu1g11130-T|Afu7g02210-T|Afu7g04430-T|Afu7g04490-T|Afu5g06510-T|Afu2g11510-T|Afu1g04840-T|Afu5g13520-T|Afu5g13470-T|Afu1g04040-T|Afu5g05930-T|Afu1g06230-T|Afu1g05080-T|Afu3g11260-T|Afu3g13280-T|Afu4g07730-T|Afu3g13320-T|Afu8g04790-T|Afu1g10760-T|Afu2g11850-T|Afu5g0176…	http://amigo.geneontology.org/cgi-bin/amigo/term_details?term=GO:0071826
cellular component organization or biogenesis	Gene Ontology	GO:0071840	208	916	2.11172e-07	Afu2g06310-T|Afu2g12890-T|Afu3g07680-T|Afu6g06430-T|Afu8g04800-T|Afu2g03150-T|Afu1g06880-T|Afu1g11860-T|Afu6g01990-T|Afu5g06010-T|Afu1g15120-T|Afu2g03590-T|Afu4g07460-T|Afu3g14010-T|Afu6g04570-T|Afu1g11130-T|Afu1g13070-T|Afu2g03870-T|Afu3g06330-T|Afu6g03820-T|Afu2g15130-T|Afu2g16750-T|Afu4g13170-T|Afu5g13470-T|Afu4g05880-T|Afu1g02550-T|Afu4g08110-T|Afu7g03690-T|Afu6g04510-T|Afu2g05950-T|Afu3g1136…	http://amigo.geneontology.org/cgi-bin/amigo/term_details?term=GO:0071840
cellular macromolecule metabolic process	Gene Ontology	GO:0044260	299	1425	2.15245e-07	Afu2g06310-T|Afu8g00420-T|Afu3g07680-T|Afu8g00100-T|Afu1g04320-T|Afu8g01240-T|Afu5g09430-T|Afu8g04800-T|Afu3g06010-T|Afu7g05460-T|Afu3g01155-T|Afu4g04260-T|Afu4g10800-T|Afu7g04811-T|Afu4g14590-T|Afu1g15120-T|Afu5g01740-T|Afu3g02480-T|Afu4g07460-T|Afu6g11260-T|Afu1g16210-T|Afu5g06560-T|Afu6g04570-T|Afu1g11130-T|Afu4g07845-T|Afu1g14140-T|Afu7g04430-T|Afu4g06690-T|Afu6g11750-T|Afu3g14010-T|Afu2g0848…	http://amigo.geneontology.org/cgi-bin/amigo/term_details?term=GO:0044260
nuclear export	Gene Ontology	GO:0051168	26	43	3.41463e-07	Afu3g07680-T|Afu1g13140-T|Afu1g05340-T|Afu5g06010-T|Afu4g08930-T|Afu4g04740-T|Afu8g03930-T|Afu7g04430-T|Afu7g04490-T|Afu5g06510-T|Afu2g11510-T|Afu2g16750-T|Afu6g12660-T|Afu1g04190-T|Afu5g05930-T|Afu3g11110-T|Afu1g05630-T|Afu1g13900-T|Afu5g06520-T|Afu1g12940-T|Afu1g04040-T|Afu3g13320-T|Afu7g01460-T|Afu3g05490-T|Afu6g12920-T|Afu1g06390-T	http://amigo.geneontology.org/cgi-bin/amigo/term_details?term=GO:0051168
ribonucleoprotein complex export from nucleus	Gene Ontology	GO:0071426	24	38	5.38904e-07	Afu5g06010-T|Afu1g05340-T|Afu4g08930-T|Afu4g04740-T|Afu8g03930-T|Afu7g04430-T|Afu7g04490-T|Afu5g06510-T|Afu2g11510-T|Afu2g16750-T|Afu6g12660-T|Afu1g04190-T|Afu5g05930-T|Afu3g11110-T|Afu1g05630-T|Afu1g13900-T|Afu5g06520-T|Afu1g12940-T|Afu1g04040-T|Afu3g13320-T|Afu7g01460-T|Afu3g05490-T|Afu6g12920-T|Afu1g06390-T	http://amigo.geneontology.org/cgi-bin/amigo/term_details?term=GO:0071426
ribosomal large subunit assembly	Gene Ontology	GO:0000027	18	21	6.60938e-07	Afu2g09210-T|Afu8g04790-T|Afu4g07730-T|Afu1g05080-T|Afu3g13280-T|Afu5g05930-T|Afu1g11130-T|Afu3g06580-T|Afu5g06510-T|Afu1g01990-T|Afu1g06230-T|Afu2g08480-T|Afu6g01990-T|Afu1g10760-T|Afu2g11850-T|Afu5g13470-T|Afu1g04040-T|Afu4g07570-T	http://amigo.geneontology.org/cgi-bin/amigo/term_details?term=GO:0000027
rRNA-containing ribonucleoprotein complex export from nucleus	Gene Ontology	GO:0071428	19	24	7.4751e-07	Afu5g06520-T|Afu5g06010-T|Afu5g06510-T|Afu4g08930-T|Afu3g13320-T|Afu5g05930-T|Afu4g04740-T|Afu8g03930-T|Afu7g04430-T|Afu1g04040-T|Afu7g04490-T|Afu1g05340-T|Afu2g11510-T|Afu3g11110-T|Afu2g16750-T|Afu7g01460-T|Afu6g12920-T|Afu6g12660-T|Afu1g05630-T	http://amigo.geneontology.org/cgi-bin/amigo/term_details?term=GO:0071428
ribonucleoprotein complex localization	Gene Ontology	GO:0071166	24	39	7.61035e-07	Afu5g06010-T|Afu1g05340-T|Afu4g08930-T|Afu4g04740-T|Afu8g03930-T|Afu7g04430-T|Afu7g04490-T|Afu5g06510-T|Afu2g11510-T|Afu2g16750-T|Afu6g12660-T|Afu1g04190-T|Afu5g05930-T|Afu3g11110-T|Afu1g05630-T|Afu1g13900-T|Afu5g06520-T|Afu1g12940-T|Afu1g04040-T|Afu3g13320-T|Afu7g01460-T|Afu3g05490-T|Afu6g12920-T|Afu1g06390-T	http://amigo.geneontology.org/cgi-bin/amigo/term_details?term=GO:0071166
organelle assembly	Gene Ontology	GO:0070925	33	70	7.84377e-07	Afu1g11130-T|Afu5g06010-T|Afu4g07570-T|Afu1g01990-T|Afu2g08480-T|Afu6g01990-T|Afu7g01400-T|Afu2g10440-T|Afu2g09210-T|Afu3g06580-T|Afu3g06640-T|Afu4g04740-T|Afu7g02210-T|Afu7g04430-T|Afu3g06330-T|Afu7g04490-T|Afu5g06510-T|Afu1g04840-T|Afu5g13520-T|Afu6g02670-T|Afu5g13470-T|Afu1g04040-T|Afu5g03080-T|Afu5g05930-T|Afu1g06230-T|Afu1g05080-T|Afu3g11260-T|Afu3g13280-T|Afu4g07730-T|Afu3g13320-T|Afu8g0479…	http://amigo.geneontology.org/cgi-bin/amigo/term_details?term=GO:0070925
cleavage involved in rRNA processing	Gene Ontology	GO:0000469	21	30	8.25994e-07	Afu2g06310-T|Afu2g03590-T|Afu2g12890-T|Afu4g05880-T|Afu3g09880-T|Afu3g06640-T|Afu6g13370-T|Afu3g04110-T|Afu2g13130-T|Afu6g04590-T|Afu1g04240-T|Afu7g04430-T|Afu6g14260-T|Afu7g04490-T|Afu3g13320-T|Afu3g11110-T|Afu1g04840-T|Afu6g06430-T|Afu3g13400-T|Afu8g04220-T|Afu3g06010-T	http://amigo.geneontology.org/cgi-bin/amigo/term_details?term=GO:0000469
RNA metabolic process	Gene Ontology	GO:0016070	177	768	8.6455e-07	Afu2g06310-T|Afu8g00420-T|Afu3g07680-T|Afu8g00100-T|Afu8g01240-T|Afu8g04800-T|Afu3g06010-T|Afu4g04260-T|Afu7g02620-T|Afu3g02480-T|Afu8g04050-T|Afu1g16210-T|Afu6g04570-T|Afu1g13070-T|Afu7g04430-T|Afu6g11750-T|Afu2g08480-T|Afu6g06430-T|Afu1g14180-T|Afu5g13470-T|Afu1g04840-T|Afu2g01980-T|Afu4g05880-T|Afu7g03690-T|Afu6g04510-T|Afu2g05950-T|Afu3g11110-T|Afu1g16730-T|Afu4g07970-T|Afu2g08320-T|Afu1g1294…	http://amigo.geneontology.org/cgi-bin/amigo/term_details?term=GO:0016070
small molecule metabolic process	Gene Ontology	GO:0044281	158	667	9.05359e-07	Afu8g00420-T|Afu6g11620-T|Afu8g00100-T|Afu8g01240-T|Afu4g13960-T|Afu8g04800-T|Afu3g12120-T|Afu4g04260-T|Afu2g11290-T|Afu3g08650-T|Afu6g10810-T|Afu1g16210-T|Afu2g05910-T|Afu3g08270-T|Afu4g06690-T|Afu2g07680-T|Afu2g03610-T|Afu5g05690-T|Afu4g11500-T|Afu4g13170-T|Afu3g09320-T|Afu5g02760-T|Afu6g12060-T|Afu6g12580-T|Afu1g12840-T|Afu7g05920-T|Afu6g07430-T|Afu6g00660-T|Afu3g15090-T|Afu2g14210-T|Afu3g0421…	http://amigo.geneontology.org/cgi-bin/amigo/term_details?term=GO:0044281
cellular nitrogen compound biosynthetic process	Gene Ontology	GO:0044271	199	895	1.41456e-06	Afu8g00420-T|Afu6g11620-T|Afu3g07680-T|Afu8g00100-T|Afu8g01240-T|Afu8g04800-T|Afu7g05460-T|Afu4g04260-T|Afu2g11290-T|Afu3g08650-T|Afu7g02620-T|Afu2g16370-T|Afu3g02480-T|Afu6g11260-T|Afu1g16210-T|Afu6g04570-T|Afu1g11130-T|Afu4g07845-T|Afu4g06690-T|Afu6g11750-T|Afu2g03610-T|Afu1g03110-T|Afu4g13170-T|Afu3g13120-T|Afu6g12060-T|Afu6g12580-T|Afu4g07820-T|Afu1g07530-T|Afu3g15090-T|Afu4g08110-T|Afu7g0369…	http://amigo.geneontology.org/cgi-bin/amigo/term_details?term=GO:0044271
endonucleolytic cleavage of tricistronic rRNA transcript (SSU-rRNA, 5.8S rRNA, LSU-rRNA)	Gene Ontology	GO:0000479	17	20	1.46484e-06	Afu2g06310-T|Afu2g03590-T|Afu2g12890-T|Afu4g05880-T|Afu3g06640-T|Afu6g13370-T|Afu3g04110-T|Afu1g04240-T|Afu7g04430-T|Afu6g14260-T|Afu3g13320-T|Afu3g11110-T|Afu1g04840-T|Afu6g06430-T|Afu3g13400-T|Afu8g04220-T|Afu3g06010-T	http://amigo.geneontology.org/cgi-bin/amigo/term_details?term=GO:0000479
small molecule biosynthetic process	Gene Ontology	GO:0044283	82	292	2.80038e-06	Afu3g12120-T|Afu6g12580-T|Afu3g06120-T|Afu7g04070-T|Afu5g08890-T|Afu4g10460-T|Afu2g11300-T|Afu1g13140-T|Afu8g01240-T|Afu4g13960-T|Afu8g00420-T|Afu8g00250-T|Afu2g16360-T|Afu4g11340-T|Afu1g12530-T|Afu1g07380-T|Afu4g08760-T|Afu3g08650-T|Afu6g04820-T|Afu6g08720-T|Afu5g04250-T|Afu2g14497-T|Afu5g03900-T|Afu7g01220-T|Afu5g02450-T|Afu3g11710-T|Afu2g11550-T|Afu4g07710-T|Afu4g07360-T|Afu8g00230-T|Afu8g0682…	http://amigo.geneontology.org/cgi-bin/amigo/term_details?term=GO:0044283
macromolecule metabolic process	Gene Ontology	GO:0043170	311	1545	3.15219e-06	Afu2g06310-T|Afu8g00420-T|Afu3g07680-T|Afu8g00100-T|Afu1g04320-T|Afu8g01240-T|Afu5g09430-T|Afu8g04800-T|Afu3g06010-T|Afu7g05460-T|Afu3g01155-T|Afu4g04260-T|Afu8g04730-T|Afu4g10800-T|Afu7g04811-T|Afu7g05930-T|Afu4g14590-T|Afu1g15120-T|Afu5g01740-T|Afu3g02480-T|Afu4g07460-T|Afu6g11260-T|Afu1g16210-T|Afu5g06560-T|Afu6g04570-T|Afu1g11130-T|Afu4g07845-T|Afu1g14140-T|Afu7g04430-T|Afu4g06690-T|Afu6g1175…	http://amigo.geneontology.org/cgi-bin/amigo/term_details?term=GO:0043170
organic acid biosynthetic process	Gene Ontology	GO:0016053	59	186	3.44807e-06	Afu6g12580-T|Afu8g00420-T|Afu3g12120-T|Afu5g08890-T|Afu4g10460-T|Afu2g11300-T|Afu1g13140-T|Afu4g13960-T|Afu4g11340-T|Afu1g12530-T|Afu1g07380-T|Afu4g08760-T|Afu3g08650-T|Afu6g08720-T|Afu5g04250-T|Afu2g14497-T|Afu1g12490-T|Afu3g11710-T|Afu4g07360-T|Afu8g04340-T|Afu8g00470-T|Afu2g07620-T|Afu2g10450-T|Afu6g07430-T|Afu6g03660-T|Afu7g01000-T|Afu2g14210-T|Afu2g12470-T|Afu5g02760-T|Afu6g12060-T|Afu2g1126…	http://amigo.geneontology.org/cgi-bin/amigo/term_details?term=GO:0016053
carboxylic acid biosynthetic process	Gene Ontology	GO:0046394	42	114	4.74928e-06	Afu3g12120-T|Afu1g10820-T|Afu4g10460-T|Afu2g11300-T|Afu4g13960-T|Afu4g11340-T|Afu1g12530-T|Afu1g07380-T|Afu5g08890-T|Afu6g08720-T|Afu5g04250-T|Afu2g14497-T|Afu3g11710-T|Afu4g07360-T|Afu8g04340-T|Afu2g07620-T|Afu6g07430-T|Afu7g01000-T|Afu2g12470-T|Afu5g02760-T|Afu2g11260-T|Afu5g05690-T|Afu2g04310-T|Afu3g08660-T|Afu6g04820-T|Afu4g03950-T|Afu2g11540-T|Afu3g04220-T|Afu2g08670-T|Afu6g04700-T|Afu1g1578…	http://amigo.geneontology.org/cgi-bin/amigo/term_details?term=GO:0046394
RNA phosphodiester bond hydrolysis, endonucleolytic	Gene Ontology	GO:0090502	18	26	5.61479e-06	Afu2g06310-T|Afu2g03590-T|Afu2g12890-T|Afu4g05880-T|Afu3g06640-T|Afu6g13370-T|Afu3g04110-T|Afu1g04240-T|Afu7g04430-T|Afu6g14260-T|Afu3g13320-T|Afu3g11110-T|Afu1g04840-T|Afu6g06430-T|Afu6g10370-T|Afu3g13400-T|Afu8g04220-T|Afu3g06010-T	http://amigo.geneontology.org/cgi-bin/amigo/term_details?term=GO:0090502
metabolic process	Gene Ontology	GO:0008152	570	3127	6.53411e-06	Afu2g06310-T|Afu8g06080-T|Afu5g02930-T|Afu8g01240-T|Afu4g13960-T|Afu2g01030-T|Afu1g08810-T|Afu2g16370-T|Afu6g04570-T|Afu4g07845-T|Afu1g07330-T|Afu1g11530-T|Afu1g04150-T|Afu6g03980-T|Afu1g03110-T|Afu4g13170-T|Afu5g01870-T|Afu5g13470-T|Afu5g02760-T|Afu4g08110-T|Afu6g04510-T|Afu4g08410-T|Afu3g11110-T|Afu7g02130-T|Afu8g00220-T|Afu2g09060-T|Afu7g04860-T|Afu1g04040-T|Afu4g04520-T|Afu1g15620-T|Afu1g0634…	http://amigo.geneontology.org/cgi-bin/amigo/term_details?term=GO:0008152
ribosomal subunit export from nucleus	Gene Ontology	GO:0000054	15	18	7.20533e-06	Afu5g06520-T|Afu5g06010-T|Afu4g08930-T|Afu5g05930-T|Afu4g04740-T|Afu8g03930-T|Afu7g04430-T|Afu7g04490-T|Afu5g06510-T|Afu2g11510-T|Afu3g11110-T|Afu2g16750-T|Afu6g12920-T|Afu1g04040-T|Afu1g05630-T	http://amigo.geneontology.org/cgi-bin/amigo/term_details?term=GO:0000054
endonucleolytic cleavage in ITS1 to separate SSU-rRNA from 5.8S rRNA and LSU-rRNA from tricistronic rRNA transcript (SSU-rRNA, 5.8S rRNA, LSU-rRNA)	Gene Ontology	GO:0000447	15	18	7.20533e-06	Afu2g03590-T|Afu2g12890-T|Afu4g05880-T|Afu6g13370-T|Afu3g04110-T|Afu1g04240-T|Afu7g04430-T|Afu6g14260-T|Afu3g13320-T|Afu3g11110-T|Afu1g04840-T|Afu6g06430-T|Afu3g13400-T|Afu8g04220-T|Afu3g06010-T	http://amigo.geneontology.org/cgi-bin/amigo/term_details?term=GO:0000447
establishment of ribosome localization	Gene Ontology	GO:0033753	15	18	7.20533e-06	Afu5g06520-T|Afu5g06010-T|Afu4g08930-T|Afu5g05930-T|Afu4g04740-T|Afu8g03930-T|Afu7g04430-T|Afu7g04490-T|Afu5g06510-T|Afu2g11510-T|Afu3g11110-T|Afu2g16750-T|Afu6g12920-T|Afu1g04040-T|Afu1g05630-T	http://amigo.geneontology.org/cgi-bin/amigo/term_details?term=GO:0033753
ribosome localization	Gene Ontology	GO:0033750	15	18	7.20533e-06	Afu5g06520-T|Afu5g06010-T|Afu4g08930-T|Afu5g05930-T|Afu4g04740-T|Afu8g03930-T|Afu7g04430-T|Afu7g04490-T|Afu5g06510-T|Afu2g11510-T|Afu3g11110-T|Afu2g16750-T|Afu6g12920-T|Afu1g04040-T|Afu1g05630-T	http://amigo.geneontology.org/cgi-bin/amigo/term_details?term=GO:0033750
nucleic acid phosphodiester bond hydrolysis	Gene Ontology	GO:0090305	25	51	9.93281e-06	Afu2g06310-T|Afu3g09880-T|Afu6g06430-T|Afu6g10370-T|Afu8g04220-T|Afu3g05530-T|Afu2g03590-T|Afu7g04130-T|Afu2g13130-T|Afu7g04430-T|Afu7g04490-T|Afu1g04840-T|Afu1g04240-T|Afu6g04590-T|Afu4g05880-T|Afu6g13370-T|Afu3g04110-T|Afu3g11110-T|Afu3g13400-T|Afu3g06010-T|Afu2g12890-T|Afu3g06640-T|Afu6g14260-T|Afu1g02060-T|Afu3g13320-T	http://amigo.geneontology.org/cgi-bin/amigo/term_details?term=GO:0090305
organic acid metabolic process	Gene Ontology	GO:0006082	99	392	1.29094e-05	Afu8g00420-T|Afu3g12120-T|Afu8g00100-T|Afu4g13960-T|Afu8g04800-T|Afu3g08650-T|Afu6g10810-T|Afu1g16210-T|Afu2g11300-T|Afu3g08270-T|Afu5g05690-T|Afu4g13170-T|Afu3g09320-T|Afu5g02760-T|Afu6g12060-T|Afu6g12580-T|Afu1g12840-T|Afu7g05920-T|Afu4g07820-T|Afu6g03050-T|Afu5g10420-T|Afu1g15000-T|Afu6g03670-T|Afu2g04980-T|Afu5g14770-T|Afu1g12490-T|Afu3g06530-T|Afu3g08660-T|Afu5g05490-T|Afu1g07380-T|Afu5g0889…	http://amigo.geneontology.org/cgi-bin/amigo/term_details?term=GO:0006082
cytoplasmic translation	Gene Ontology	GO:0002181	19	32	1.5605e-05	Afu7g03980-T|Afu2g10100-T|Afu1g05080-T|Afu1g12940-T|Afu4g07660-T|Afu6g04570-T|Afu1g11130-T|Afu8g03930-T|Afu6g13250-T|Afu1g09330-T|Afu3g08640-T|Afu3g13320-T|Afu5g06360-T|Afu1g03110-T|Afu1g09100-T|Afu6g04520-T|Afu1g06390-T|Afu1g06830-T|Afu4g07435-T	http://amigo.geneontology.org/cgi-bin/amigo/term_details?term=GO:0002181
maturation of LSU-rRNA	Gene Ontology	GO:0000470	15	20	1.7348e-05	Afu2g06310-T|Afu3g13280-T|Afu2g17060-T|Afu5g03870-T|Afu5g05930-T|Afu6g08900-T|Afu5g12100-T|Afu8g04790-T|Afu4g07570-T|Afu4g13330-T|Afu6g01990-T|Afu5g06010-T|Afu5g01760-T|Afu6g04260-T|Afu2g13980-T	http://amigo.geneontology.org/cgi-bin/amigo/term_details?term=GO:0000470
maturation of LSU-rRNA from tricistronic rRNA transcript (SSU-rRNA, 5.8S rRNA, LSU-rRNA)	Gene Ontology	GO:0000463	14	18	2.49465e-05	Afu2g06310-T|Afu2g17060-T|Afu5g03870-T|Afu5g05930-T|Afu6g08900-T|Afu5g12100-T|Afu8g04790-T|Afu4g07570-T|Afu4g13330-T|Afu6g01990-T|Afu5g06010-T|Afu5g01760-T|Afu6g04260-T|Afu2g13980-T	http://amigo.geneontology.org/cgi-bin/amigo/term_details?term=GO:0000463
RNA phosphodiester bond hydrolysis	Gene Ontology	GO:0090501	22	44	2.64861e-05	Afu2g06310-T|Afu3g09880-T|Afu6g06430-T|Afu6g10370-T|Afu8g04220-T|Afu2g03590-T|Afu3g06640-T|Afu2g13130-T|Afu7g04430-T|Afu7g04490-T|Afu1g04840-T|Afu1g04240-T|Afu6g04590-T|Afu4g05880-T|Afu6g13370-T|Afu3g04110-T|Afu3g11110-T|Afu3g13400-T|Afu3g06010-T|Afu2g12890-T|Afu6g14260-T|Afu3g13320-T	http://amigo.geneontology.org/cgi-bin/amigo/term_details?term=GO:0090501
DNA-dependent DNA replication	Gene Ontology	GO:0006261	25	56	3.40726e-05	Afu1g03920-T|Afu2g16600-T|Afu6g01990-T|Afu5g08110-T|Afu4g04390-T|Afu1g07530-T|Afu3g06580-T|Afu3g14010-T|Afu2g12250-T|Afu5g01870-T|Afu3g09560-T|Afu6g13290-T|Afu2g15610-T|Afu4g07970-T|Afu5g13370-T|Afu2g10730-T|Afu2g09060-T|Afu3g08300-T|Afu1g12940-T|Afu5g02520-T|Afu3g06060-T|Afu1g07320-T|Afu2g17050-T|Afu1g03410-T|Afu1g15310-T	http://amigo.geneontology.org/cgi-bin/amigo/term_details?term=GO:0006261
cell cycle DNA replication	Gene Ontology	GO:0044786	16	25	3.73823e-05	Afu2g10730-T|Afu2g09060-T|Afu1g12940-T|Afu3g09560-T|Afu5g02520-T|Afu3g06060-T|Afu3g06580-T|Afu1g07320-T|Afu1g15310-T|Afu2g17050-T|Afu6g13290-T|Afu6g01990-T|Afu4g07970-T|Afu5g08110-T|Afu3g14010-T|Afu5g13370-T	http://amigo.geneontology.org/cgi-bin/amigo/term_details?term=GO:0044786
nuclear DNA replication	Gene Ontology	GO:0033260	16	25	3.73823e-05	Afu2g10730-T|Afu2g09060-T|Afu1g12940-T|Afu3g09560-T|Afu5g02520-T|Afu3g06060-T|Afu3g06580-T|Afu1g07320-T|Afu1g15310-T|Afu2g17050-T|Afu6g13290-T|Afu6g01990-T|Afu4g07970-T|Afu5g08110-T|Afu3g14010-T|Afu5g13370-T	http://amigo.geneontology.org/cgi-bin/amigo/term_details?term=GO:0033260
single-organism biosynthetic process	Gene Ontology	GO:0044711	132	584	5.17203e-05	Afu8g06080-T|Afu3g12120-T|Afu8g01240-T|Afu4g13960-T|Afu8g00420-T|Afu4g04260-T|Afu2g11290-T|Afu3g08650-T|Afu3g08270-T|Afu1g14140-T|Afu4g06690-T|Afu2g03610-T|Afu5g05690-T|Afu4g11500-T|Afu5g02760-T|Afu6g12060-T|Afu6g12580-T|Afu7g05920-T|Afu8g00200-T|Afu6g00660-T|Afu3g15090-T|Afu2g07520-T|Afu2g14210-T|Afu3g04210-T|Afu6g03050-T|Afu1g15000-T|Afu7g03940-T|Afu6g03670-T|Afu4g12600-T|Afu5g14770-T|Afu4g0427…	http://amigo.geneontology.org/cgi-bin/amigo/term_details?term=GO:0044711
DNA replication	Gene Ontology	GO:0006260	26	62	5.52214e-05	Afu1g03920-T|Afu2g16600-T|Afu6g01990-T|Afu5g08110-T|Afu4g04390-T|Afu1g07530-T|Afu4g06690-T|Afu3g06580-T|Afu3g14010-T|Afu2g12250-T|Afu5g01870-T|Afu3g09560-T|Afu6g13290-T|Afu2g15610-T|Afu4g07970-T|Afu5g13370-T|Afu2g10730-T|Afu2g09060-T|Afu3g08300-T|Afu1g12940-T|Afu5g02520-T|Afu3g06060-T|Afu1g07320-T|Afu2g17050-T|Afu1g03410-T|Afu1g15310-T	http://amigo.geneontology.org/cgi-bin/amigo/term_details?term=GO:0006260
eukaryotic translation initiation factor 3 complex	Gene Ontology	GO:0005852	11	12	6.888e-05	Afu2g09870-T|Afu1g05200-T|Afu1g02030-T|Afu2g14670-T|Afu3g11360-T|Afu2g10380-T|Afu1g09330-T|Afu3g08640-T|Afu7g03980-T|Afu4g03860-T|Afu1g09970-T	http://amigo.geneontology.org/cgi-bin/amigo/term_details?term=GO:0005852
alpha-amino acid metabolic process	Gene Ontology	GO:1901605	36	106	8.80586e-05	Afu3g00690-T|Afu1g10820-T|Afu2g11300-T|Afu3g08660-T|Afu4g11340-T|Afu1g07380-T|Afu5g08890-T|Afu6g08720-T|Afu5g02850-T|Afu6g10810-T|Afu3g11710-T|Afu4g07360-T|Afu5g04250-T|Afu8g04340-T|Afu2g07620-T|Afu2g10450-T|Afu7g01000-T|Afu2g12470-T|Afu3g09320-T|Afu6g12580-T|Afu2g04310-T|Afu4g10460-T|Afu4g09830-T|Afu2g13250-T|Afu7g02230-T|Afu1g10130-T|Afu4g03760-T|Afu6g02910-T|Afu5g13130-T|Afu7g01010-T|Afu1g1078…	http://amigo.geneontology.org/cgi-bin/amigo/term_details?term=GO:1901605
nucleocytoplasmic transport	Gene Ontology	GO:0006913	30	82	0.000115466	Afu3g07680-T|Afu1g13140-T|Afu1g05340-T|Afu5g06010-T|Afu1g04040-T|Afu4g08930-T|Afu4g04740-T|Afu8g03930-T|Afu7g04430-T|Afu7g04490-T|Afu5g06510-T|Afu2g11510-T|Afu2g16750-T|Afu6g08350-T|Afu6g12660-T|Afu1g04190-T|Afu5g05930-T|Afu2g08670-T|Afu3g11110-T|Afu1g05630-T|Afu1g13900-T|Afu5g06520-T|Afu5g01180-T|Afu1g12940-T|Afu1g06790-T|Afu3g13320-T|Afu7g01460-T|Afu3g05490-T|Afu6g12920-T|Afu1g06390-T	http://amigo.geneontology.org/cgi-bin/amigo/term_details?term=GO:0006913
translational elongation	Gene Ontology	GO:0006414	13	19	0.00012314	Afu2g10100-T|Afu1g05080-T|Afu2g13530-T|Afu4g08110-T|Afu6g04570-T|Afu8g03930-T|Afu6g13250-T|Afu7g05660-T|Afu7g01460-T|Afu1g06390-T|Afu1g09440-T|Afu1g12170-T|Afu1g06830-T	http://amigo.geneontology.org/cgi-bin/amigo/term_details?term=GO:0006414
nuclear transport	Gene Ontology	GO:0051169	30	83	0.000137423	Afu3g07680-T|Afu1g13140-T|Afu1g05340-T|Afu5g06010-T|Afu1g04040-T|Afu4g08930-T|Afu4g04740-T|Afu8g03930-T|Afu7g04430-T|Afu7g04490-T|Afu5g06510-T|Afu2g11510-T|Afu2g16750-T|Afu6g08350-T|Afu6g12660-T|Afu1g04190-T|Afu5g05930-T|Afu2g08670-T|Afu3g11110-T|Afu1g05630-T|Afu1g13900-T|Afu5g06520-T|Afu5g01180-T|Afu1g12940-T|Afu1g06790-T|Afu3g13320-T|Afu7g01460-T|Afu3g05490-T|Afu6g12920-T|Afu1g06390-T	http://amigo.geneontology.org/cgi-bin/amigo/term_details?term=GO:0051169
cellular amino acid biosynthetic process	Gene Ontology	GO:0008652	25	63	0.000153197	Afu5g08890-T|Afu2g11300-T|Afu4g11340-T|Afu1g10820-T|Afu6g08720-T|Afu5g04250-T|Afu3g11710-T|Afu4g07360-T|Afu8g04340-T|Afu2g07620-T|Afu1g15780-T|Afu2g12470-T|Afu2g11260-T|Afu5g05690-T|Afu2g04310-T|Afu6g04820-T|Afu4g10460-T|Afu6g04700-T|Afu6g02910-T|Afu5g13130-T|Afu1g15000-T|Afu1g14570-T|Afu4g03950-T|Afu5g14770-T|Afu3g04170-T	http://amigo.geneontology.org/cgi-bin/amigo/term_details?term=GO:0008652
cellular macromolecular complex assembly	Gene Ontology	GO:0034622	55	199	0.000168321	Afu3g06070-T|Afu2g08480-T|Afu7g02210-T|Afu8g04800-T|Afu5g11200-T|Afu1g01990-T|Afu2g06200-T|Afu6g01990-T|Afu2g17060-T|Afu1g13390-T|Afu2g09210-T|Afu7g04490-T|Afu3g06640-T|Afu1g11130-T|Afu6g10410-T|Afu7g04430-T|Afu3g06330-T|Afu3g06580-T|Afu5g02910-T|Afu2g11510-T|Afu1g04840-T|Afu6g04100-T|Afu5g13520-T|Afu2g10440-T|Afu5g13470-T|Afu1g04040-T|Afu3g14010-T|Afu1g06880-T|Afu1g02550-T|Afu5g06010-T|Afu5g0651…	http://amigo.geneontology.org/cgi-bin/amigo/term_details?term=GO:0034622
oxoacid metabolic process	Gene Ontology	GO:0043436	74	295	0.000189058	Afu3g12120-T|Afu3g00690-T|Afu5g02930-T|Afu8g00100-T|Afu4g10460-T|Afu2g05910-T|Afu4g13960-T|Afu8g04800-T|Afu1g12840-T|Afu4g11340-T|Afu1g12530-T|Afu1g07380-T|Afu5g08890-T|Afu6g08720-T|Afu5g04250-T|Afu2g14497-T|Afu6g10810-T|Afu5g09450-T|Afu1g06960-T|Afu3g11710-T|Afu1g16210-T|Afu4g07360-T|Afu2g11300-T|Afu3g08270-T|Afu2g07620-T|Afu6g07430-T|Afu6g03660-T|Afu7g01000-T|Afu8g07110-T|Afu2g12470-T|Afu3g0932…	http://amigo.geneontology.org/cgi-bin/amigo/term_details?term=GO:0043436
carboxylic acid metabolic process	Gene Ontology	GO:0019752	72	285	0.00019235	Afu3g12120-T|Afu3g00690-T|Afu5g02930-T|Afu8g00100-T|Afu4g10460-T|Afu2g05910-T|Afu4g13960-T|Afu8g04800-T|Afu4g11340-T|Afu1g12530-T|Afu1g07380-T|Afu5g08890-T|Afu6g08720-T|Afu5g04250-T|Afu2g14497-T|Afu6g10810-T|Afu5g09450-T|Afu1g06960-T|Afu3g11710-T|Afu1g16210-T|Afu4g07360-T|Afu2g11300-T|Afu3g08270-T|Afu2g07620-T|Afu6g07430-T|Afu6g03660-T|Afu7g01000-T|Afu8g07110-T|Afu2g12470-T|Afu3g09320-T|Afu5g0276…	http://amigo.geneontology.org/cgi-bin/amigo/term_details?term=GO:0019752
endonucleolytic cleavage to generate mature 5'-end of SSU-rRNA from (SSU-rRNA, 5.8S rRNA, LSU-rRNA)	Gene Ontology	GO:0000472	10	12	0.000251043	Afu2g12890-T|Afu4g05880-T|Afu6g13370-T|Afu6g06430-T|Afu1g04240-T|Afu3g11110-T|Afu1g04840-T|Afu3g13400-T|Afu8g04220-T|Afu3g06010-T	http://amigo.geneontology.org/cgi-bin/amigo/term_details?term=GO:0000472
endonucleolytic cleavage in 5'-ETS of tricistronic rRNA transcript (SSU-rRNA, 5.8S rRNA, LSU-rRNA)	Gene Ontology	GO:0000480	10	12	0.000251043	Afu2g12890-T|Afu4g05880-T|Afu6g13370-T|Afu1g04240-T|Afu6g14260-T|Afu3g11110-T|Afu1g04840-T|Afu3g13400-T|Afu8g04220-T|Afu3g06010-T	http://amigo.geneontology.org/cgi-bin/amigo/term_details?term=GO:0000480
macromolecule biosynthetic process	Gene Ontology	GO:0009059	170	823	0.000265661	Afu8g00420-T|Afu3g07680-T|Afu8g00100-T|Afu8g01240-T|Afu8g04800-T|Afu7g05460-T|Afu3g01155-T|Afu1g06340-T|Afu7g02620-T|Afu2g16370-T|Afu3g02480-T|Afu6g11260-T|Afu1g16210-T|Afu6g04570-T|Afu1g11130-T|Afu4g07845-T|Afu1g14140-T|Afu4g06690-T|Afu6g11750-T|Afu3g14010-T|Afu2g12250-T|Afu1g03110-T|Afu4g13170-T|Afu4g08110-T|Afu7g03690-T|Afu6g04510-T|Afu4g08010-T|Afu1g09330-T|Afu8g04050-T|Afu4g03860-T|Afu4g0797…	http://amigo.geneontology.org/cgi-bin/amigo/term_details?term=GO:0009059
DNA strand elongation	Gene Ontology	GO:0022616	12	18	0.000266794	Afu2g09060-T|Afu3g08300-T|Afu3g14010-T|Afu3g09560-T|Afu3g06060-T|Afu1g07320-T|Afu3g09050-T|Afu2g12250-T|Afu2g16600-T|Afu4g07970-T|Afu5g01870-T|Afu5g13370-T	http://amigo.geneontology.org/cgi-bin/amigo/term_details?term=GO:0022616
cellular macromolecule biosynthetic process	Gene Ontology	GO:0034645	169	818	0.00027499	Afu8g00420-T|Afu3g07680-T|Afu8g00100-T|Afu8g01240-T|Afu8g04800-T|Afu7g05460-T|Afu3g01155-T|Afu1g06340-T|Afu7g02620-T|Afu2g16370-T|Afu3g02480-T|Afu6g11260-T|Afu1g16210-T|Afu6g04570-T|Afu1g11130-T|Afu4g07845-T|Afu1g14140-T|Afu4g06690-T|Afu6g11750-T|Afu3g14010-T|Afu2g12250-T|Afu1g03110-T|Afu4g13170-T|Afu4g08110-T|Afu7g03690-T|Afu6g04510-T|Afu4g08010-T|Afu1g09330-T|Afu8g04050-T|Afu4g03860-T|Afu4g0797…	http://amigo.geneontology.org/cgi-bin/amigo/term_details?term=GO:0034645
alpha-amino acid biosynthetic process	Gene Ontology	GO:1901607	24	62	0.000277143	Afu5g08890-T|Afu2g11300-T|Afu3g08660-T|Afu4g11340-T|Afu1g07380-T|Afu1g10820-T|Afu6g08720-T|Afu5g04250-T|Afu3g11710-T|Afu4g07360-T|Afu8g04340-T|Afu2g07620-T|Afu2g10450-T|Afu2g12470-T|Afu6g12580-T|Afu2g04310-T|Afu4g10460-T|Afu2g13250-T|Afu6g02910-T|Afu5g13130-T|Afu1g13090-T|Afu4g03950-T|Afu5g14770-T|Afu3g04170-T	http://amigo.geneontology.org/cgi-bin/amigo/term_details?term=GO:1901607
DNA replication initiation	Gene Ontology	GO:0006270	12	19	0.000382717	Afu2g10730-T|Afu2g09060-T|Afu1g07530-T|Afu3g09560-T|Afu5g02520-T|Afu5g08110-T|Afu3g06580-T|Afu3g14010-T|Afu1g03920-T|Afu2g17050-T|Afu6g01990-T|Afu1g15310-T	http://amigo.geneontology.org/cgi-bin/amigo/term_details?term=GO:0006270
cellular amino acid metabolic process	Gene Ontology	GO:0006520	43	149	0.000394509	Afu3g00690-T|Afu8g04340-T|Afu8g00100-T|Afu2g11300-T|Afu8g04800-T|Afu3g09320-T|Afu4g11340-T|Afu5g08890-T|Afu6g08720-T|Afu5g04250-T|Afu6g10810-T|Afu5g09450-T|Afu3g11710-T|Afu1g16210-T|Afu4g07360-T|Afu5g02930-T|Afu2g07620-T|Afu7g01000-T|Afu4g07820-T|Afu2g12470-T|Afu8g07110-T|Afu2g11260-T|Afu5g05690-T|Afu2g04310-T|Afu6g04820-T|Afu4g10460-T|Afu6g04700-T|Afu4g13170-T|Afu7g02230-T|Afu4g03760-T|Afu6g0291…	http://amigo.geneontology.org/cgi-bin/amigo/term_details?term=GO:0006520
DNA metabolic process	Gene Ontology	GO:0006259	52	193	0.000416882	Afu1g03920-T|Afu2g03910-T|Afu4g11180-T|Afu2g16600-T|Afu6g01990-T|Afu5g08110-T|Afu1g15120-T|Afu1g07530-T|Afu3g05530-T|Afu4g04390-T|Afu7g04783-T|Afu1g02060-T|Afu4g07360-T|Afu3g02390-T|Afu4g06690-T|Afu3g06580-T|Afu3g14010-T|Afu3g09050-T|Afu2g12250-T|Afu6g08350-T|Afu5g01870-T|Afu4g10630-T|Afu6g13290-T|Afu4g13320-T|Afu1g13010-T|Afu7g03690-T|Afu6g04510-T|Afu4g07230-T|Afu3g09560-T|Afu2g12030-T|Afu2g1050…	http://amigo.geneontology.org/cgi-bin/amigo/term_details?term=GO:0006259
nucleobase-containing small molecule metabolic process	Gene Ontology	GO:0055086	46	166	0.000530159	Afu1g13500-T|Afu8g05330-T|Afu2g13470-T|Afu1g13140-T|Afu6g11620-T|Afu1g02890-T|Afu2g03700-T|Afu4g10790-T|Afu4g04260-T|Afu2g11290-T|Afu3g08650-T|Afu6g08720-T|Afu2g11010-T|Afu6g05320-T|Afu2g10855-T|Afu1g06960-T|Afu2g11940-T|Afu4g07360-T|Afu5g12350-T|Afu8g00850-T|Afu8g02770-T|Afu5g06390-T|Afu2g03610-T|Afu6g07430-T|Afu7g01000-T|Afu1g01160-T|Afu6g04730-T|Afu7g02310-T|Afu7g05670-T|Afu4g06690-T|Afu3g1509…	http://amigo.geneontology.org/cgi-bin/amigo/term_details?term=GO:0055086
rRNA modification	Gene Ontology	GO:0000154	9	11	0.000564867	Afu5g05710-T|Afu1g13460-T|Afu7g04860-T|Afu4g13450-T|Afu5g12100-T|Afu1g16730-T|Afu1g14220-T|Afu3g06010-T|Afu5g01760-T	http://amigo.geneontology.org/cgi-bin/amigo/term_details?term=GO:0000154
DNA strand elongation involved in DNA replication	Gene Ontology	GO:0006271	11	17	0.000576564	Afu2g09060-T|Afu3g08300-T|Afu3g14010-T|Afu3g09560-T|Afu3g06060-T|Afu1g07320-T|Afu2g16600-T|Afu2g12250-T|Afu4g07970-T|Afu5g01870-T|Afu5g13370-T	http://amigo.geneontology.org/cgi-bin/amigo/term_details?term=GO:0006271
nucleobase metabolic process	Gene Ontology	GO:0009112	14	27	0.000577368	Afu2g10855-T|Afu8g05330-T|Afu8g00850-T|Afu4g07360-T|Afu2g13470-T|Afu7g05210-T|Afu5g06390-T|Afu2g11290-T|Afu3g08650-T|Afu2g08360-T|Afu4g12600-T|Afu6g04730-T|Afu7g02310-T|Afu2g11010-T	http://amigo.geneontology.org/cgi-bin/amigo/term_details?term=GO:0009112
RNA modification	Gene Ontology	GO:0009451	20	50	0.000625906	Afu4g12140-T|Afu1g14630-T|Afu1g07570-T|Afu5g01850-T|Afu5g11650-T|Afu6g04510-T|Afu7g04860-T|Afu4g13450-T|Afu5g05710-T|Afu5g12100-T|Afu2g16360-T|Afu1g13880-T|Afu4g04260-T|Afu1g14180-T|Afu1g16730-T|Afu1g14770-T|Afu1g14220-T|Afu1g13460-T|Afu3g06010-T|Afu5g01760-T	http://amigo.geneontology.org/cgi-bin/amigo/term_details?term=GO:0009451
nucleoside phosphate biosynthetic process	Gene Ontology	GO:1901293	25	71	0.000656498	Afu8g00850-T|Afu1g13140-T|Afu4g10790-T|Afu2g11010-T|Afu6g05320-T|Afu2g10855-T|Afu1g07530-T|Afu5g12350-T|Afu6g11620-T|Afu4g06690-T|Afu2g03610-T|Afu3g15090-T|Afu6g04730-T|Afu7g02310-T|Afu7g05670-T|Afu2g11940-T|Afu4g09830-T|Afu1g15450-T|Afu4g07690-T|Afu7g05210-T|Afu2g08360-T|Afu5g04100-T|Afu4g12600-T|Afu5g03460-T|Afu4g04270-T	http://amigo.geneontology.org/cgi-bin/amigo/term_details?term=GO:1901293
nucleotide biosynthetic process	Gene Ontology	GO:0009165	24	67	0.00068574	Afu8g00850-T|Afu1g13140-T|Afu4g10790-T|Afu2g11010-T|Afu6g05320-T|Afu2g10855-T|Afu1g07530-T|Afu5g12350-T|Afu6g11620-T|Afu4g06690-T|Afu2g03610-T|Afu6g04730-T|Afu7g02310-T|Afu7g05670-T|Afu2g11940-T|Afu4g09830-T|Afu1g15450-T|Afu4g07690-T|Afu7g05210-T|Afu2g08360-T|Afu5g04100-T|Afu4g12600-T|Afu5g03460-T|Afu4g04270-T	http://amigo.geneontology.org/cgi-bin/amigo/term_details?term=GO:0009165
macromolecule methylation	Gene Ontology	GO:0043414	22	59	0.000735052	Afu1g07570-T|Afu1g13460-T|Afu5g12100-T|Afu4g07360-T|Afu2g02750-T|Afu1g14180-T|Afu4g12140-T|Afu2g09930-T|Afu3g08030-T|Afu7g02130-T|Afu6g04520-T|Afu1g14220-T|Afu3g06010-T|Afu5g01850-T|Afu5g11650-T|Afu4g11040-T|Afu3g12490-T|Afu5g08110-T|Afu4g13320-T|Afu4g03950-T|Afu2g09080-T|Afu5g01760-T	http://amigo.geneontology.org/cgi-bin/amigo/term_details?term=GO:0043414
macromolecular complex assembly	Gene Ontology	GO:0065003	59	235	0.000802196	Afu4g07730-T|Afu3g06070-T|Afu2g08480-T|Afu6g06430-T|Afu8g04800-T|Afu5g11200-T|Afu1g01990-T|Afu7g04430-T|Afu2g06200-T|Afu6g01990-T|Afu2g17060-T|Afu8g03990-T|Afu1g13390-T|Afu2g09210-T|Afu7g04490-T|Afu3g06640-T|Afu1g11130-T|Afu7g02210-T|Afu2g03870-T|Afu3g06330-T|Afu3g06580-T|Afu5g02910-T|Afu2g11510-T|Afu1g04840-T|Afu6g04100-T|Afu5g13520-T|Afu2g10440-T|Afu5g13470-T|Afu1g04040-T|Afu3g14010-T|Afu1g0688…	http://amigo.geneontology.org/cgi-bin/amigo/term_details?term=GO:0065003
nucleobase biosynthetic process	Gene Ontology	GO:0046112	11	18	0.000817628	Afu2g10855-T|Afu8g05330-T|Afu8g00850-T|Afu4g07360-T|Afu7g05210-T|Afu2g11290-T|Afu3g08650-T|Afu2g08360-T|Afu6g04730-T|Afu7g02310-T|Afu2g11010-T	http://amigo.geneontology.org/cgi-bin/amigo/term_details?term=GO:0046112
methylation	Gene Ontology	GO:0032259	22	61	0.00104873	Afu1g07570-T|Afu1g13460-T|Afu5g12100-T|Afu4g07360-T|Afu2g02750-T|Afu1g14180-T|Afu4g12140-T|Afu2g09930-T|Afu3g08030-T|Afu7g02130-T|Afu6g04520-T|Afu1g14220-T|Afu3g06010-T|Afu5g01850-T|Afu5g11650-T|Afu4g11040-T|Afu3g12490-T|Afu5g08110-T|Afu4g13320-T|Afu4g03950-T|Afu2g09080-T|Afu5g01760-T	http://amigo.geneontology.org/cgi-bin/amigo/term_details?term=GO:0032259
pre-replicative complex assembly involved in nuclear cell cycle DNA replication	Gene Ontology	GO:0006267	7	7	0.00110491	Afu2g09060-T|Afu5g02520-T|Afu5g08110-T|Afu3g06580-T|Afu3g14010-T|Afu2g17050-T|Afu6g01990-T	http://amigo.geneontology.org/cgi-bin/amigo/term_details?term=GO:0006267
pre-replicative complex assembly	Gene Ontology	GO:0036388	7	7	0.00110491	Afu2g09060-T|Afu5g02520-T|Afu5g08110-T|Afu3g06580-T|Afu3g14010-T|Afu2g17050-T|Afu6g01990-T	http://amigo.geneontology.org/cgi-bin/amigo/term_details?term=GO:0036388
eukaryotic translation initiation factor 3 complex, eIF3m	Gene Ontology	GO:0071541	7	7	0.00110491	Afu2g09870-T|Afu1g05200-T|Afu1g02030-T|Afu2g14670-T|Afu1g09330-T|Afu3g08640-T|Afu4g03860-T	http://amigo.geneontology.org/cgi-bin/amigo/term_details?term=GO:0071541
pre-replicative complex assembly involved in cell cycle DNA replication	Gene Ontology	GO:1902299	7	7	0.00110491	Afu2g09060-T|Afu5g02520-T|Afu5g08110-T|Afu3g06580-T|Afu3g14010-T|Afu2g17050-T|Afu6g01990-T	http://amigo.geneontology.org/cgi-bin/amigo/term_details?term=GO:1902299
DNA recombination	Gene Ontology	GO:0006310	21	59	0.0015418	Afu2g10730-T|Afu2g09060-T|Afu2g03910-T|Afu1g13010-T|Afu1g12940-T|Afu6g04510-T|Afu3g02390-T|Afu4g07230-T|Afu3g09560-T|Afu5g02520-T|Afu2g10500-T|Afu3g09850-T|Afu4g04390-T|Afu1g02060-T|Afu3g09050-T|Afu6g13290-T|Afu4g12310-T|Afu1g14695-T|Afu1g06360-T|Afu1g15120-T|Afu3g14010-T	http://amigo.geneontology.org/cgi-bin/amigo/term_details?term=GO:0006310
RNA localization	Gene Ontology	GO:0006403	14	31	0.00162879	Afu6g11380-T|Afu3g09880-T|Afu1g12940-T|Afu4g04740-T|Afu1g04190-T|Afu7g04490-T|Afu1g05340-T|Afu3g13320-T|Afu1g05630-T|Afu7g01460-T|Afu3g05490-T|Afu1g06390-T|Afu1g13900-T|Afu6g12660-T	http://amigo.geneontology.org/cgi-bin/amigo/term_details?term=GO:0006403
aspartate family amino acid metabolic process	Gene Ontology	GO:0009066	15	35	0.00169579	Afu7g01010-T|Afu5g08890-T|Afu2g11300-T|Afu4g07360-T|Afu4g10460-T|Afu1g10630-T|Afu4g11340-T|Afu2g07620-T|Afu8g04340-T|Afu1g10820-T|Afu4g03950-T|Afu7g01000-T|Afu6g08720-T|Afu5g04250-T|Afu3g11710-T	http://amigo.geneontology.org/cgi-bin/amigo/term_details?term=GO:0009066
nucleobase-containing compound transport	Gene Ontology	GO:0015931	16	39	0.00172566	Afu1g07450-T|Afu6g05170-T|Afu1g12940-T|Afu4g04740-T|Afu1g05390-T|Afu6g11380-T|Afu3g13320-T|Afu7g04490-T|Afu1g05340-T|Afu1g04190-T|Afu1g05630-T|Afu7g01460-T|Afu3g05490-T|Afu1g06390-T|Afu1g13900-T|Afu6g12660-T	http://amigo.geneontology.org/cgi-bin/amigo/term_details?term=GO:0015931
ribosomal small subunit assembly	Gene Ontology	GO:0000028	7	8	0.00183361	Afu3g06640-T|Afu7g02210-T|Afu7g04490-T|Afu3g13320-T|Afu1g04840-T|Afu3g11260-T|Afu2g10440-T	http://amigo.geneontology.org/cgi-bin/amigo/term_details?term=GO:0000028
aromatic amino acid family biosynthetic process	Gene Ontology	GO:0009073	9	14	0.00188704	Afu6g12580-T|Afu5g13130-T|Afu2g13250-T|Afu1g02110-T|Afu1g13090-T|Afu5g05690-T|Afu2g10450-T|Afu4g08760-T|Afu7g04070-T	http://amigo.geneontology.org/cgi-bin/amigo/term_details?term=GO:0009073
pyrimidine nucleotide metabolic process	Gene Ontology	GO:0006220	9	14	0.00188704	Afu8g00850-T|Afu5g12350-T|Afu1g02890-T|Afu7g05210-T|Afu4g06690-T|Afu2g08360-T|Afu2g11010-T|Afu5g03460-T|Afu4g04270-T	http://amigo.geneontology.org/cgi-bin/amigo/term_details?term=GO:0006220
establishment of organelle localization	Gene Ontology	GO:0051656	20	56	0.00191072	Afu5g06520-T|Afu1g13140-T|Afu4g04740-T|Afu5g06010-T|Afu4g13390-T|Afu5g05930-T|Afu7g04430-T|Afu8g03930-T|Afu7g00250-T|Afu7g04490-T|Afu5g06510-T|Afu2g11510-T|Afu3g11110-T|Afu2g16750-T|Afu3g10720-T|Afu6g12920-T|Afu4g08930-T|Afu1g04040-T|Afu6g08660-T|Afu1g05630-T	http://amigo.geneontology.org/cgi-bin/amigo/term_details?term=GO:0051656
pyrimidine nucleotide biosynthetic process	Gene Ontology	GO:0006221	8	11	0.00194539	Afu8g00850-T|Afu5g12350-T|Afu7g05210-T|Afu4g06690-T|Afu2g08360-T|Afu2g11010-T|Afu5g03460-T|Afu4g04270-T	http://amigo.geneontology.org/cgi-bin/amigo/term_details?term=GO:0006221
nucleic acid transport	Gene Ontology	GO:0050657	13	28	0.00195353	Afu6g11380-T|Afu1g12940-T|Afu4g04740-T|Afu1g04190-T|Afu7g04490-T|Afu1g05340-T|Afu3g13320-T|Afu1g05630-T|Afu7g01460-T|Afu3g05490-T|Afu1g06390-T|Afu1g13900-T|Afu6g12660-T	http://amigo.geneontology.org/cgi-bin/amigo/term_details?term=GO:0050657
establishment of RNA localization	Gene Ontology	GO:0051236	13	28	0.00195353	Afu6g11380-T|Afu1g12940-T|Afu4g04740-T|Afu1g04190-T|Afu7g04490-T|Afu1g05340-T|Afu3g13320-T|Afu1g05630-T|Afu7g01460-T|Afu3g05490-T|Afu1g06390-T|Afu1g13900-T|Afu6g12660-T	http://amigo.geneontology.org/cgi-bin/amigo/term_details?term=GO:0051236
RNA transport	Gene Ontology	GO:0050658	13	28	0.00195353	Afu6g11380-T|Afu1g12940-T|Afu4g04740-T|Afu1g04190-T|Afu7g04490-T|Afu1g05340-T|Afu3g13320-T|Afu1g05630-T|Afu7g01460-T|Afu3g05490-T|Afu1g06390-T|Afu1g13900-T|Afu6g12660-T	http://amigo.geneontology.org/cgi-bin/amigo/term_details?term=GO:0050658
cellular component assembly	Gene Ontology	GO:0022607	75	332	0.00216211	Afu4g04740-T|Afu3g06070-T|Afu2g08480-T|Afu6g06430-T|Afu2g11270-T|Afu8g04800-T|Afu5g11200-T|Afu5g06510-T|Afu7g04430-T|Afu2g06200-T|Afu6g01990-T|Afu2g10440-T|Afu2g17060-T|Afu8g03990-T|Afu7g01400-T|Afu5g11600-T|Afu3g09910-T|Afu4g04180-T|Afu3g05530-T|Afu7g04490-T|Afu4g07460-T|Afu3g06640-T|Afu3g12250-T|Afu1g11130-T|Afu7g02210-T|Afu2g11510-T|Afu2g03870-T|Afu3g06330-T|Afu3g06580-T|Afu5g02910-T|Afu1g1339…	http://amigo.geneontology.org/cgi-bin/amigo/term_details?term=GO:0022607
RNA export from nucleus	Gene Ontology	GO:0006405	12	25	0.0023281	Afu4g04740-T|Afu1g04190-T|Afu1g12940-T|Afu7g04490-T|Afu1g05340-T|Afu3g13320-T|Afu1g05630-T|Afu7g01460-T|Afu3g05490-T|Afu1g06390-T|Afu1g13900-T|Afu6g12660-T	http://amigo.geneontology.org/cgi-bin/amigo/term_details?term=GO:0006405
RNA methylation	Gene Ontology	GO:0001510	10	18	0.0023843	Afu4g12140-T|Afu1g07570-T|Afu5g01850-T|Afu5g11650-T|Afu1g13460-T|Afu5g12100-T|Afu1g14180-T|Afu1g14220-T|Afu3g06010-T|Afu5g01760-T	http://amigo.geneontology.org/cgi-bin/amigo/term_details?term=GO:0001510
nucleotide metabolic process	Gene Ontology	GO:0009117	35	127	0.00251231	Afu1g13500-T|Afu8g00850-T|Afu1g13140-T|Afu1g02890-T|Afu2g03700-T|Afu4g10790-T|Afu2g11010-T|Afu6g05320-T|Afu2g10855-T|Afu1g06960-T|Afu1g07530-T|Afu5g12350-T|Afu2g05910-T|Afu6g11620-T|Afu4g06690-T|Afu2g03610-T|Afu6g07430-T|Afu7g01000-T|Afu1g01160-T|Afu6g04730-T|Afu7g02310-T|Afu7g05670-T|Afu2g11940-T|Afu1g03420-T|Afu4g09830-T|Afu1g15450-T|Afu7g01010-T|Afu4g07690-T|Afu4g02960-T|Afu7g05210-T|Afu2g0836…	http://amigo.geneontology.org/cgi-bin/amigo/term_details?term=GO:0009117
nucleoside phosphate metabolic process	Gene Ontology	GO:0006753	36	132	0.00254718	Afu1g13500-T|Afu8g00850-T|Afu1g13140-T|Afu1g02890-T|Afu2g03700-T|Afu4g10790-T|Afu2g11010-T|Afu6g05320-T|Afu2g10855-T|Afu1g06960-T|Afu2g11940-T|Afu1g07530-T|Afu5g12350-T|Afu2g05910-T|Afu6g11620-T|Afu4g06690-T|Afu2g03610-T|Afu6g07430-T|Afu7g01000-T|Afu1g01160-T|Afu6g04730-T|Afu7g02310-T|Afu7g05670-T|Afu3g15090-T|Afu1g03420-T|Afu4g09830-T|Afu1g15450-T|Afu7g01010-T|Afu4g07690-T|Afu4g02960-T|Afu7g0521…	http://amigo.geneontology.org/cgi-bin/amigo/term_details?term=GO:0006753
rRNA export from nucleus	Gene Ontology	GO:0006407	7	9	0.00288602	Afu4g04740-T|Afu7g04490-T|Afu1g05340-T|Afu3g13320-T|Afu1g05630-T|Afu7g01460-T|Afu6g12660-T	http://amigo.geneontology.org/cgi-bin/amigo/term_details?term=GO:0006407
pyrimidine ribonucleoside metabolic process	Gene Ontology	GO:0046131	7	9	0.00288602	Afu5g12350-T|Afu8g02770-T|Afu7g05210-T|Afu4g06690-T|Afu2g11290-T|Afu2g08360-T|Afu2g11010-T	http://amigo.geneontology.org/cgi-bin/amigo/term_details?term=GO:0046131
pyrimidine nucleoside metabolic process	Gene Ontology	GO:0006213	7	9	0.00288602	Afu5g12350-T|Afu8g02770-T|Afu7g05210-T|Afu4g06690-T|Afu2g11290-T|Afu2g08360-T|Afu2g11010-T	http://amigo.geneontology.org/cgi-bin/amigo/term_details?term=GO:0006213
rRNA transport	Gene Ontology	GO:0051029	7	9	0.00288602	Afu4g04740-T|Afu7g04490-T|Afu1g05340-T|Afu3g13320-T|Afu1g05630-T|Afu7g01460-T|Afu6g12660-T	http://amigo.geneontology.org/cgi-bin/amigo/term_details?term=GO:0051029
aromatic amino acid family metabolic process	Gene Ontology	GO:0009072	13	30	0.00313708	Afu6g10810-T|Afu5g13130-T|Afu4g09830-T|Afu2g13250-T|Afu1g02110-T|Afu1g13090-T|Afu5g05690-T|Afu2g10450-T|Afu4g08760-T|Afu7g04070-T|Afu6g12580-T|Afu4g10620-T|Afu5g02850-T	http://amigo.geneontology.org/cgi-bin/amigo/term_details?term=GO:0009072
pyrimidine-containing compound metabolic process	Gene Ontology	GO:0072527	12	27	0.0038083	Afu8g00850-T|Afu1g02890-T|Afu5g12350-T|Afu2g13470-T|Afu8g02770-T|Afu7g05210-T|Afu4g06690-T|Afu2g11290-T|Afu2g08360-T|Afu4g04270-T|Afu5g03460-T|Afu2g11010-T	http://amigo.geneontology.org/cgi-bin/amigo/term_details?term=GO:0072527
aspartate family amino acid biosynthetic process	Gene Ontology	GO:0009067	12	27	0.0038083	Afu8g04340-T|Afu3g11710-T|Afu2g11300-T|Afu4g07360-T|Afu4g10460-T|Afu4g11340-T|Afu2g07620-T|Afu1g10820-T|Afu4g03950-T|Afu6g08720-T|Afu5g04250-T|Afu5g08890-T	http://amigo.geneontology.org/cgi-bin/amigo/term_details?term=GO:0009067
assembly of large subunit precursor of preribosome	Gene Ontology	GO:1902626	6	7	0.004223	Afu3g13280-T|Afu2g17060-T|Afu8g04790-T|Afu2g11510-T|Afu5g06010-T|Afu5g01760-T	http://amigo.geneontology.org/cgi-bin/amigo/term_details?term=GO:1902626
nitrogen compound transport	Gene Ontology	GO:0071705	29	103	0.00437778	Afu6g14530-T|Afu6g05170-T|Afu5g02790-T|Afu4g06230-T|Afu6g11100-T|Afu1g05340-T|Afu5g01510-T|Afu4g04740-T|Afu1g05390-T|Afu1g07450-T|Afu7g04490-T|Afu2g15130-T|Afu2g04080-T|Afu4g13090-T|Afu6g12660-T|Afu4g09660-T|Afu1g04190-T|Afu6g11380-T|Afu1g17470-T|Afu1g05630-T|Afu4g03370-T|Afu1g13900-T|Afu4g03220-T|Afu1g12940-T|Afu3g13320-T|Afu7g01460-T|Afu3g05490-T|Afu5g04100-T|Afu1g06390-T	http://amigo.geneontology.org/cgi-bin/amigo/term_details?term=GO:0071705
acyl-CoA metabolic process	Gene Ontology	GO:0006637	9	17	0.00496446	Afu1g06960-T|Afu7g05720-T|Afu2g09910-T|Afu3g08270-T|Afu4g07130-T|Afu2g03700-T|Afu5g04230-T|Afu4g07780-T|Afu3g04170-T	http://amigo.geneontology.org/cgi-bin/amigo/term_details?term=GO:0006637
thioester metabolic process	Gene Ontology	GO:0035383	9	17	0.00496446	Afu1g06960-T|Afu7g05720-T|Afu2g09910-T|Afu3g08270-T|Afu4g07130-T|Afu2g03700-T|Afu5g04230-T|Afu4g07780-T|Afu3g04170-T	http://amigo.geneontology.org/cgi-bin/amigo/term_details?term=GO:0035383
regulation of translation	Gene Ontology	GO:0006417	14	37	0.00582579	Afu1g05200-T|Afu3g09880-T|Afu2g13530-T|Afu1g12940-T|Afu6g04570-T|Afu8g04800-T|Afu8g03930-T|Afu6g13250-T|Afu5g02330-T|Afu2g15980-T|Afu7g01460-T|Afu4g13170-T|Afu6g04520-T|Afu1g09440-T	http://amigo.geneontology.org/cgi-bin/amigo/term_details?term=GO:0006417
monocarboxylic acid biosynthetic process	Gene Ontology	GO:0072330	16	46	0.00639266	Afu3g12120-T|Afu6g03660-T|Afu7g05920-T|Afu2g07520-T|Afu2g11540-T|Afu4g13960-T|Afu6g03670-T|Afu2g08670-T|Afu1g12530-T|Afu2g14497-T|Afu6g04820-T|Afu6g07430-T|Afu3g04220-T|Afu7g01000-T|Afu6g03050-T|Afu5g02760-T	http://amigo.geneontology.org/cgi-bin/amigo/term_details?term=GO:0072330
one-carbon metabolic process	Gene Ontology	GO:0006730	6	8	0.00656156	Afu8g05330-T|Afu1g10780-T|Afu2g11300-T|Afu1g10130-T|Afu3g08650-T|Afu3g09320-T	http://amigo.geneontology.org/cgi-bin/amigo/term_details?term=GO:0006730
organelle localization	Gene Ontology	GO:0051640	21	69	0.00696024	Afu5g06520-T|Afu1g13140-T|Afu4g04740-T|Afu5g06010-T|Afu1g02550-T|Afu4g13390-T|Afu5g05930-T|Afu7g04430-T|Afu8g03930-T|Afu7g00250-T|Afu7g04490-T|Afu5g06510-T|Afu2g11510-T|Afu3g11110-T|Afu2g16750-T|Afu3g10720-T|Afu6g12920-T|Afu4g08930-T|Afu1g04040-T|Afu6g08660-T|Afu1g05630-T	http://amigo.geneontology.org/cgi-bin/amigo/term_details?term=GO:0051640
ribose phosphate biosynthetic process	Gene Ontology	GO:0046390	16	47	0.00752979	Afu2g10855-T|Afu1g13140-T|Afu2g11940-T|Afu4g10790-T|Afu4g07690-T|Afu6g11620-T|Afu7g05210-T|Afu1g07530-T|Afu1g15450-T|Afu2g08360-T|Afu5g04100-T|Afu4g12600-T|Afu7g05670-T|Afu6g04730-T|Afu7g02310-T|Afu2g11010-T	http://amigo.geneontology.org/cgi-bin/amigo/term_details?term=GO:0046390
mitotic DNA replication	Gene Ontology	GO:1902969	8	15	0.00771457	Afu2g10730-T|Afu2g09060-T|Afu3g09560-T|Afu3g06060-T|Afu1g07320-T|Afu6g13290-T|Afu5g13370-T|Afu1g15310-T	http://amigo.geneontology.org/cgi-bin/amigo/term_details?term=GO:1902969
acetyl-CoA metabolic process	Gene Ontology	GO:0006084	8	15	0.00771457	Afu1g06960-T|Afu7g05720-T|Afu3g08270-T|Afu4g07130-T|Afu2g03700-T|Afu5g04230-T|Afu4g07780-T|Afu3g04170-T	http://amigo.geneontology.org/cgi-bin/amigo/term_details?term=GO:0006084
pyrimidine-containing compound biosynthetic process	Gene Ontology	GO:0072528	10	23	0.00898306	Afu8g00850-T|Afu5g12350-T|Afu8g02770-T|Afu7g05210-T|Afu4g06690-T|Afu2g11290-T|Afu2g08360-T|Afu4g04270-T|Afu5g03460-T|Afu2g11010-T	http://amigo.geneontology.org/cgi-bin/amigo/term_details?term=GO:0072528
regulation of cellular amide metabolic process	Gene Ontology	GO:0034248	19	62	0.00939581	Afu1g05200-T|Afu8g00420-T|Afu3g09880-T|Afu2g13530-T|Afu1g12940-T|Afu1g13140-T|Afu6g04570-T|Afu8g04800-T|Afu8g03930-T|Afu6g13250-T|Afu5g02330-T|Afu2g15980-T|Afu7g01460-T|Afu4g13170-T|Afu6g04520-T|Afu6g02910-T|Afu1g09440-T|Afu6g09630-T|Afu1g12490-T	http://amigo.geneontology.org/cgi-bin/amigo/term_details?term=GO:0034248
pyrimidine ribonucleotide metabolic process	Gene Ontology	GO:0009218	5	6	0.00981351	Afu4g06690-T|Afu5g12350-T|Afu2g08360-T|Afu7g05210-T|Afu2g11010-T	http://amigo.geneontology.org/cgi-bin/amigo/term_details?term=GO:0009218
purine-containing compound biosynthetic process	Gene Ontology	GO:0072522	16	49	0.010288	Afu2g10855-T|Afu1g13140-T|Afu8g05330-T|Afu2g11940-T|Afu4g07690-T|Afu6g11620-T|Afu5g06390-T|Afu4g07360-T|Afu2g03610-T|Afu1g15450-T|Afu3g08650-T|Afu5g04100-T|Afu4g12600-T|Afu6g04730-T|Afu7g02310-T|Afu1g07530-T	http://amigo.geneontology.org/cgi-bin/amigo/term_details?term=GO:0072522
nucleoside monophosphate biosynthetic process	Gene Ontology	GO:0009124	13	36	0.0104661	Afu2g10855-T|Afu2g11940-T|Afu4g07690-T|Afu6g11620-T|Afu1g07530-T|Afu1g15450-T|Afu3g15090-T|Afu2g08360-T|Afu4g12600-T|Afu4g04270-T|Afu6g04730-T|Afu7g02310-T|Afu2g11010-T	http://amigo.geneontology.org/cgi-bin/amigo/term_details?term=GO:0009124
single-organism cellular process	Gene Ontology	GO:0044763	297	1679	0.0107547	Afu7g01400-T|Afu8g06080-T|Afu6g11620-T|Afu3g07680-T|Afu8g00100-T|Afu3g07015-T|Afu8g01240-T|Afu5g11200-T|Afu4g13960-T|Afu8g04800-T|Afu8g00420-T|Afu4g07710-T|Afu2g03150-T|Afu3g03660-T|Afu3g12120-T|Afu4g04260-T|Afu2g11290-T|Afu3g08650-T|Afu6g01990-T|Afu8g01780-T|Afu1g15120-T|Afu6g10810-T|Afu7g02560-T|Afu4g07460-T|Afu6g07430-T|Afu6g04570-T|Afu7g03900-T|Afu3g08270-T|Afu1g14140-T|Afu4g06690-T|Afu2g0768…	http://amigo.geneontology.org/cgi-bin/amigo/term_details?term=GO:0044763
methionine metabolic process	Gene Ontology	GO:0006555	9	20	0.0109731	Afu2g11300-T|Afu4g07360-T|Afu8g04340-T|Afu1g10630-T|Afu2g07620-T|Afu1g10820-T|Afu4g03950-T|Afu6g08720-T|Afu5g04250-T	http://amigo.geneontology.org/cgi-bin/amigo/term_details?term=GO:0006555
translational initiation	Gene Ontology	GO:0006413	10	24	0.0112336	Afu5g11985-T|Afu1g06520-T|Afu5g01850-T|Afu4g07660-T|Afu1g09330-T|Afu3g08640-T|Afu7g03980-T|Afu1g03970-T|Afu4g13170-T|Afu4g03860-T	http://amigo.geneontology.org/cgi-bin/amigo/term_details?term=GO:0006413
macromolecular complex subunit organization	Gene Ontology	GO:0043933	73	350	0.012374	Afu3g09850-T|Afu3g06070-T|Afu2g08480-T|Afu6g06430-T|Afu5g11200-T|Afu8g04800-T|Afu2g03150-T|Afu1g06880-T|Afu1g01990-T|Afu7g04430-T|Afu2g06200-T|Afu6g01990-T|Afu2g10440-T|Afu3g07680-T|Afu8g03990-T|Afu3g14010-T|Afu5g02520-T|Afu1g13390-T|Afu3g14110-T|Afu7g04490-T|Afu3g06640-T|Afu5g06560-T|Afu6g04570-T|Afu1g11130-T|Afu7g02210-T|Afu2g03870-T|Afu3g06330-T|Afu3g06580-T|Afu5g02910-T|Afu2g11510-T|Afu1g0484…	http://amigo.geneontology.org/cgi-bin/amigo/term_details?term=GO:0043933
posttranscriptional regulation of gene expression	Gene Ontology	GO:0010608	15	46	0.012859	Afu1g05200-T|Afu3g09880-T|Afu2g13530-T|Afu1g12940-T|Afu6g04570-T|Afu8g04800-T|Afu8g03930-T|Afu6g13250-T|Afu5g02330-T|Afu2g15980-T|Afu7g01460-T|Afu5g09430-T|Afu4g13170-T|Afu6g04520-T|Afu1g09440-T	http://amigo.geneontology.org/cgi-bin/amigo/term_details?term=GO:0010608
cellular response to UV	Gene Ontology	GO:0034644	8	17	0.0133281	Afu3g08300-T|Afu2g03910-T|Afu1g12940-T|Afu3g06060-T|Afu2g16600-T|Afu2g12250-T|Afu4g07970-T|Afu5g01870-T	http://amigo.geneontology.org/cgi-bin/amigo/term_details?term=GO:0034644
purine nucleobase metabolic process	Gene Ontology	GO:0006144	8	17	0.0133281	Afu2g10855-T|Afu8g05330-T|Afu4g07360-T|Afu5g06390-T|Afu3g08650-T|Afu4g12600-T|Afu6g04730-T|Afu7g02310-T	http://amigo.geneontology.org/cgi-bin/amigo/term_details?term=GO:0006144
sulfur compound metabolic process	Gene Ontology	GO:0006790	25	94	0.0137132	Afu3g12120-T|Afu1g12490-T|Afu1g05020-T|Afu3g06530-T|Afu2g03700-T|Afu6g08920-T|Afu1g10820-T|Afu5g04250-T|Afu1g06960-T|Afu8g04340-T|Afu3g08270-T|Afu4g07130-T|Afu1g13140-T|Afu2g07620-T|Afu6g09630-T|Afu5g03900-T|Afu7g05720-T|Afu2g09910-T|Afu1g10130-T|Afu5g06610-T|Afu4g07780-T|Afu1g10630-T|Afu5g04230-T|Afu4g03950-T|Afu3g04170-T	http://amigo.geneontology.org/cgi-bin/amigo/term_details?term=GO:0006790
pyrimidine nucleobase metabolic process	Gene Ontology	GO:0006206	6	10	0.01381	Afu2g13470-T|Afu8g00850-T|Afu7g05210-T|Afu2g11290-T|Afu2g08360-T|Afu2g11010-T	http://amigo.geneontology.org/cgi-bin/amigo/term_details?term=GO:0006206
UV-damage excision repair	Gene Ontology	GO:0070914	6	10	0.01381	Afu3g08300-T|Afu3g06060-T|Afu2g16600-T|Afu2g12250-T|Afu4g07970-T|Afu5g01870-T	http://amigo.geneontology.org/cgi-bin/amigo/term_details?term=GO:0070914
purine nucleobase biosynthetic process	Gene Ontology	GO:0009113	6	10	0.01381	Afu2g10855-T|Afu8g05330-T|Afu4g07360-T|Afu3g08650-T|Afu6g04730-T|Afu7g02310-T	http://amigo.geneontology.org/cgi-bin/amigo/term_details?term=GO:0009113
cellular response to light stimulus	Gene Ontology	GO:0071482	9	21	0.0138566	Afu3g08300-T|Afu1g12490-T|Afu1g12940-T|Afu3g06060-T|Afu2g03910-T|Afu2g16600-T|Afu2g12250-T|Afu4g07970-T|Afu5g01870-T	http://amigo.geneontology.org/cgi-bin/amigo/term_details?term=GO:0071482
cellular response to radiation	Gene Ontology	GO:0071478	9	21	0.0138566	Afu3g08300-T|Afu1g12490-T|Afu1g12940-T|Afu3g06060-T|Afu2g03910-T|Afu2g16600-T|Afu2g12250-T|Afu4g07970-T|Afu5g01870-T	http://amigo.geneontology.org/cgi-bin/amigo/term_details?term=GO:0071478
rRNA methylation	Gene Ontology	GO:0031167	5	7	0.0149931	Afu5g01760-T|Afu1g14220-T|Afu1g13460-T|Afu3g06010-T|Afu5g12100-T	http://amigo.geneontology.org/cgi-bin/amigo/term_details?term=GO:0031167
ribonucleoside monophosphate biosynthetic process	Gene Ontology	GO:0009156	12	34	0.0156044	Afu2g10855-T|Afu2g11940-T|Afu4g07690-T|Afu6g11620-T|Afu1g07530-T|Afu1g15450-T|Afu3g15090-T|Afu2g08360-T|Afu4g12600-T|Afu6g04730-T|Afu7g02310-T|Afu2g11010-T	http://amigo.geneontology.org/cgi-bin/amigo/term_details?term=GO:0009156
modification by symbiont of host morphology or physiology	Gene Ontology	GO:0044003	8	18	0.0170453	Afu7g01010-T|Afu6g12930-T|Afu4g07360-T|Afu3g00590-T|Afu8g03930-T|Afu6g04210-T|Afu2g03610-T|Afu6g07430-T	http://amigo.geneontology.org/cgi-bin/amigo/term_details?term=GO:0044003
modification of morphology or physiology of other organism involved in symbiotic interaction	Gene Ontology	GO:0051817	8	18	0.0170453	Afu7g01010-T|Afu6g12930-T|Afu4g07360-T|Afu3g00590-T|Afu8g03930-T|Afu6g04210-T|Afu2g03610-T|Afu6g07430-T	http://amigo.geneontology.org/cgi-bin/amigo/term_details?term=GO:0051817
modification of morphology or physiology of other organism	Gene Ontology	GO:0035821	8	18	0.0170453	Afu7g01010-T|Afu6g12930-T|Afu4g07360-T|Afu3g00590-T|Afu8g03930-T|Afu6g04210-T|Afu2g03610-T|Afu6g07430-T	http://amigo.geneontology.org/cgi-bin/amigo/term_details?term=GO:0035821
carbohydrate derivative biosynthetic process	Gene Ontology	GO:1901137	33	138	0.0183076	Afu1g13140-T|Afu4g10790-T|Afu4g04260-T|Afu2g11290-T|Afu4g06690-T|Afu2g11010-T|Afu2g10855-T|Afu1g07530-T|Afu5g12350-T|Afu6g11620-T|Afu1g14140-T|Afu5g06390-T|Afu2g11940-T|Afu6g04730-T|Afu7g02310-T|Afu7g05670-T|Afu4g08410-T|Afu4g04180-T|Afu1g13280-T|Afu6g04210-T|Afu1g15450-T|Afu4g12600-T|Afu2g11560-T|Afu5g11650-T|Afu4g07690-T|Afu7g05210-T|Afu7g04190-T|Afu2g08360-T|Afu5g04100-T|Afu3g07700-T|Afu1g1456…	http://amigo.geneontology.org/cgi-bin/amigo/term_details?term=GO:1901137
ribonucleotide biosynthetic process	Gene Ontology	GO:0009260	14	44	0.0186827	Afu2g10855-T|Afu1g13140-T|Afu2g11940-T|Afu4g07690-T|Afu6g11620-T|Afu7g05210-T|Afu1g07530-T|Afu1g15450-T|Afu2g08360-T|Afu5g04100-T|Afu4g12600-T|Afu6g04730-T|Afu7g02310-T|Afu2g11010-T	http://amigo.geneontology.org/cgi-bin/amigo/term_details?term=GO:0009260
protein import into mitochondrial matrix	Gene Ontology	GO:0030150	6	11	0.0189727	Afu6g05110-T|Afu6g11380-T|Afu2g04270-T|Afu1g11860-T|Afu6g05174-T|Afu2g13040-T	http://amigo.geneontology.org/cgi-bin/amigo/term_details?term=GO:0030150
ribose phosphate metabolic process	Gene Ontology	GO:0019693	24	93	0.0204719	Afu1g13500-T|Afu2g05910-T|Afu1g13140-T|Afu2g03700-T|Afu4g10790-T|Afu5g08240-T|Afu2g11010-T|Afu2g10855-T|Afu1g06960-T|Afu1g07530-T|Afu5g12350-T|Afu6g11620-T|Afu4g06690-T|Afu6g07430-T|Afu6g04730-T|Afu7g02310-T|Afu7g05670-T|Afu2g11940-T|Afu1g15450-T|Afu4g07690-T|Afu7g05210-T|Afu2g08360-T|Afu5g04100-T|Afu4g12600-T	http://amigo.geneontology.org/cgi-bin/amigo/term_details?term=GO:0019693
glutamine family amino acid biosynthetic process	Gene Ontology	GO:0009084	8	19	0.0214529	Afu2g04310-T|Afu3g08660-T|Afu1g07380-T|Afu6g02910-T|Afu6g08720-T|Afu2g12470-T|Afu5g14770-T|Afu3g04170-T	http://amigo.geneontology.org/cgi-bin/amigo/term_details?term=GO:0009084
methionine biosynthetic process	Gene Ontology	GO:0009086	8	19	0.0214529	Afu2g11300-T|Afu4g07360-T|Afu8g04340-T|Afu2g07620-T|Afu1g10820-T|Afu4g03950-T|Afu6g08720-T|Afu5g04250-T	http://amigo.geneontology.org/cgi-bin/amigo/term_details?term=GO:0009086
IMP metabolic process	Gene Ontology	GO:0046040	5	8	0.0217244	Afu4g07690-T|Afu4g12600-T|Afu6g11620-T|Afu6g04730-T|Afu2g10855-T	http://amigo.geneontology.org/cgi-bin/amigo/term_details?term=GO:0046040
pyrimidine nucleobase biosynthetic process	Gene Ontology	GO:0019856	5	8	0.0217244	Afu7g05210-T|Afu2g11010-T|Afu2g08360-T|Afu2g11290-T|Afu8g00850-T	http://amigo.geneontology.org/cgi-bin/amigo/term_details?term=GO:0019856
2'-deoxyribonucleotide metabolic process	Gene Ontology	GO:0009394	5	8	0.0217244	Afu5g12350-T|Afu4g06690-T|Afu1g02890-T|Afu5g03460-T|Afu4g04270-T	http://amigo.geneontology.org/cgi-bin/amigo/term_details?term=GO:0009394
'de novo' IMP biosynthetic process	Gene Ontology	GO:0006189	5	8	0.0217244	Afu4g07690-T|Afu4g12600-T|Afu6g11620-T|Afu6g04730-T|Afu2g10855-T	http://amigo.geneontology.org/cgi-bin/amigo/term_details?term=GO:0006189
deoxyribose phosphate metabolic process	Gene Ontology	GO:0019692	5	8	0.0217244	Afu5g12350-T|Afu4g06690-T|Afu1g02890-T|Afu5g03460-T|Afu4g04270-T	http://amigo.geneontology.org/cgi-bin/amigo/term_details?term=GO:0019692
pyrimidine deoxyribonucleotide metabolic process	Gene Ontology	GO:0009219	5	8	0.0217244	Afu5g12350-T|Afu4g06690-T|Afu1g02890-T|Afu5g03460-T|Afu4g04270-T	http://amigo.geneontology.org/cgi-bin/amigo/term_details?term=GO:0009219
IMP biosynthetic process	Gene Ontology	GO:0006188	5	8	0.0217244	Afu4g07690-T|Afu4g12600-T|Afu6g11620-T|Afu6g04730-T|Afu2g10855-T	http://amigo.geneontology.org/cgi-bin/amigo/term_details?term=GO:0006188
sulfur amino acid metabolic process	Gene Ontology	GO:0000096	5	8	0.0217244	Afu3g06530-T|Afu2g07620-T|Afu5g04250-T|Afu8g04340-T|Afu4g03950-T	http://amigo.geneontology.org/cgi-bin/amigo/term_details?term=GO:0000096
gene conversion	Gene Ontology	GO:0035822	5	8	0.0217244	Afu4g04390-T|Afu2g10730-T|Afu3g09560-T|Afu3g09050-T|Afu3g09850-T	http://amigo.geneontology.org/cgi-bin/amigo/term_details?term=GO:0035822
tRNA metabolic process	Gene Ontology	GO:0006399	23	89	0.0226519	Afu1g07570-T|Afu8g00100-T|Afu8g04800-T|Afu2g16360-T|Afu5g05490-T|Afu4g04260-T|Afu3g09880-T|Afu2g13720-T|Afu1g14630-T|Afu1g16210-T|Afu2g13130-T|Afu3g12280-T|Afu1g14180-T|Afu4g07820-T|Afu4g12140-T|Afu6g04510-T|Afu1g16730-T|Afu1g14770-T|Afu1g14220-T|Afu8g07110-T|Afu5g01850-T|Afu5g11650-T|Afu5g11120-T	http://amigo.geneontology.org/cgi-bin/amigo/term_details?term=GO:0006399
organophosphate biosynthetic process	Gene Ontology	GO:0090407	30	125	0.0227737	Afu8g00850-T|Afu1g13140-T|Afu1g14140-T|Afu2g03700-T|Afu4g10790-T|Afu2g11010-T|Afu6g05320-T|Afu2g10855-T|Afu1g07530-T|Afu5g12350-T|Afu6g11620-T|Afu4g07130-T|Afu4g06690-T|Afu2g03610-T|Afu3g15090-T|Afu6g04730-T|Afu7g02310-T|Afu7g05670-T|Afu2g11940-T|Afu4g09830-T|Afu1g15450-T|Afu4g07780-T|Afu4g07690-T|Afu7g05210-T|Afu5g02450-T|Afu2g08360-T|Afu5g04100-T|Afu4g12600-T|Afu5g03460-T|Afu4g04270-T	http://amigo.geneontology.org/cgi-bin/amigo/term_details?term=GO:0090407
lysine biosynthetic process via aminoadipic acid	Gene Ontology	GO:0019878	4	5	0.0230849	Afu4g11340-T|Afu4g10460-T|Afu3g11710-T|Afu5g08890-T	http://amigo.geneontology.org/cgi-bin/amigo/term_details?term=GO:0019878
homocysteine metabolic process	Gene Ontology	GO:0050667	4	5	0.0230849	Afu2g07620-T|Afu5g04250-T|Afu8g04340-T|Afu4g03950-T	http://amigo.geneontology.org/cgi-bin/amigo/term_details?term=GO:0050667
pyrimidine ribonucleoside biosynthetic process	Gene Ontology	GO:0046132	4	5	0.0230849	Afu7g05210-T|Afu2g08360-T|Afu2g11290-T|Afu2g11010-T	http://amigo.geneontology.org/cgi-bin/amigo/term_details?term=GO:0046132
pyrimidine deoxyribonucleotide biosynthetic process	Gene Ontology	GO:0009221	4	5	0.0230849	Afu5g12350-T|Afu4g06690-T|Afu5g03460-T|Afu4g04270-T	http://amigo.geneontology.org/cgi-bin/amigo/term_details?term=GO:0009221
deoxyribose phosphate biosynthetic process	Gene Ontology	GO:0046385	4	5	0.0230849	Afu5g12350-T|Afu4g06690-T|Afu5g03460-T|Afu4g04270-T	http://amigo.geneontology.org/cgi-bin/amigo/term_details?term=GO:0046385
adenine biosynthetic process	Gene Ontology	GO:0046084	4	5	0.0230849	Afu4g07360-T|Afu2g10855-T|Afu6g04730-T|Afu7g02310-T	http://amigo.geneontology.org/cgi-bin/amigo/term_details?term=GO:0046084
2'-deoxyribonucleotide biosynthetic process	Gene Ontology	GO:0009265	4	5	0.0230849	Afu5g12350-T|Afu4g06690-T|Afu5g03460-T|Afu4g04270-T	http://amigo.geneontology.org/cgi-bin/amigo/term_details?term=GO:0009265
premeiotic DNA replication	Gene Ontology	GO:0006279	4	5	0.0230849	Afu4g07970-T|Afu3g09560-T|Afu2g09060-T|Afu2g10730-T	http://amigo.geneontology.org/cgi-bin/amigo/term_details?term=GO:0006279
deoxyribonucleotide biosynthetic process	Gene Ontology	GO:0009263	4	5	0.0230849	Afu5g12350-T|Afu4g06690-T|Afu5g03460-T|Afu4g04270-T	http://amigo.geneontology.org/cgi-bin/amigo/term_details?term=GO:0009263
pyrimidine nucleoside biosynthetic process	Gene Ontology	GO:0046134	4	5	0.0230849	Afu7g05210-T|Afu2g08360-T|Afu2g11290-T|Afu2g11010-T	http://amigo.geneontology.org/cgi-bin/amigo/term_details?term=GO:0046134
organic cyclic compound biosynthetic process	Gene Ontology	GO:1901362	148	802	0.0232059	Afu8g06080-T|Afu6g11620-T|Afu3g07680-T|Afu8g01240-T|Afu8g00420-T|Afu3g12120-T|Afu4g04260-T|Afu2g11290-T|Afu3g08650-T|Afu7g02620-T|Afu3g02480-T|Afu6g04570-T|Afu4g06690-T|Afu6g11750-T|Afu2g03610-T|Afu5g05690-T|Afu4g11500-T|Afu6g12060-T|Afu6g12580-T|Afu3g15090-T|Afu6g00660-T|Afu2g10730-T|Afu6g04510-T|Afu4g08410-T|Afu4g08010-T|Afu5g03140-T|Afu4g07970-T|Afu8g04050-T|Afu1g12940-T|Afu3g14840-T|Afu6g0830…	http://amigo.geneontology.org/cgi-bin/amigo/term_details?term=GO:1901362
aromatic compound biosynthetic process	Gene Ontology	GO:0019438	133	714	0.0242958	Afu8g06080-T|Afu6g11620-T|Afu3g07680-T|Afu8g01240-T|Afu8g00420-T|Afu3g12120-T|Afu4g04260-T|Afu2g11290-T|Afu3g08650-T|Afu7g02620-T|Afu3g02480-T|Afu6g04570-T|Afu4g06690-T|Afu6g11750-T|Afu2g03610-T|Afu5g05690-T|Afu6g12060-T|Afu6g12580-T|Afu3g15090-T|Afu6g00660-T|Afu2g10730-T|Afu6g04510-T|Afu4g08410-T|Afu4g08010-T|Afu5g03140-T|Afu4g07970-T|Afu8g04050-T|Afu1g12940-T|Afu3g14840-T|Afu6g08300-T|Afu5g0628…	http://amigo.geneontology.org/cgi-bin/amigo/term_details?term=GO:0019438
sterol biosynthetic process	Gene Ontology	GO:0016126	10	28	0.0246483	Afu7g01220-T|Afu2g03700-T|Afu2g11550-T|Afu1g04720-T|Afu4g07130-T|Afu5g02450-T|Afu2g07680-T|Afu4g11500-T|Afu4g03630-T|Afu4g07780-T	http://amigo.geneontology.org/cgi-bin/amigo/term_details?term=GO:0016126
induction by organism of defense response of other organism involved in symbiotic interaction	Gene Ontology	GO:0052251	6	12	0.0253095	Afu7g01010-T|Afu6g12930-T|Afu4g07360-T|Afu8g03930-T|Afu2g03610-T|Afu6g07430-T	http://amigo.geneontology.org/cgi-bin/amigo/term_details?term=GO:0052251
positive regulation by organism of defense response of other organism involved in symbiotic interaction	Gene Ontology	GO:0052510	6	12	0.0253095	Afu7g01010-T|Afu6g12930-T|Afu4g07360-T|Afu8g03930-T|Afu2g03610-T|Afu6g07430-T	http://amigo.geneontology.org/cgi-bin/amigo/term_details?term=GO:0052510
induction by symbiont of host defense response	Gene Ontology	GO:0044416	6	12	0.0253095	Afu7g01010-T|Afu6g12930-T|Afu4g07360-T|Afu8g03930-T|Afu2g03610-T|Afu6g07430-T	http://amigo.geneontology.org/cgi-bin/amigo/term_details?term=GO:0044416
positive regulation by symbiont of host defense response	Gene Ontology	GO:0052509	6	12	0.0253095	Afu7g01010-T|Afu6g12930-T|Afu4g07360-T|Afu8g03930-T|Afu2g03610-T|Afu6g07430-T	http://amigo.geneontology.org/cgi-bin/amigo/term_details?term=GO:0052509
positive regulation of defense response	Gene Ontology	GO:0031349	6	12	0.0253095	Afu7g01010-T|Afu6g12930-T|Afu4g07360-T|Afu8g03930-T|Afu2g03610-T|Afu6g07430-T	http://amigo.geneontology.org/cgi-bin/amigo/term_details?term=GO:0031349
cellular protein metabolic process	Gene Ontology	GO:0044267	119	633	0.0260438	Afu8g00100-T|Afu8g04800-T|Afu7g05460-T|Afu1g06340-T|Afu4g10800-T|Afu2g16370-T|Afu2g03590-T|Afu4g07460-T|Afu6g11260-T|Afu1g16210-T|Afu6g04570-T|Afu1g11130-T|Afu4g07845-T|Afu1g14140-T|Afu1g03110-T|Afu4g13170-T|Afu2g02750-T|Afu4g08110-T|Afu3g11360-T|Afu1g09330-T|Afu2g09930-T|Afu7g03980-T|Afu7g02130-T|Afu4g07820-T|Afu1g12940-T|Afu3g12490-T|Afu4g07660-T|Afu1g06830-T|Afu7g01460-T|Afu5g06590-T|Afu5g1198…	http://amigo.geneontology.org/cgi-bin/amigo/term_details?term=GO:0044267
nucleotide phosphorylation	Gene Ontology	GO:0046939	7	16	0.0266187	Afu1g06960-T|Afu1g03420-T|Afu2g05910-T|Afu1g07530-T|Afu4g06690-T|Afu6g07430-T|Afu5g03460-T	http://amigo.geneontology.org/cgi-bin/amigo/term_details?term=GO:0046939
regulation of defense response	Gene Ontology	GO:0031347	7	16	0.0266187	Afu7g01010-T|Afu6g12930-T|Afu4g07360-T|Afu8g03930-T|Afu6g04210-T|Afu2g03610-T|Afu6g07430-T	http://amigo.geneontology.org/cgi-bin/amigo/term_details?term=GO:0031347
modulation by organism of defense response of other organism involved in symbiotic interaction	Gene Ontology	GO:0052255	7	16	0.0266187	Afu7g01010-T|Afu6g12930-T|Afu4g07360-T|Afu8g03930-T|Afu6g04210-T|Afu2g03610-T|Afu6g07430-T	http://amigo.geneontology.org/cgi-bin/amigo/term_details?term=GO:0052255
modulation by symbiont of host defense response	Gene Ontology	GO:0052031	7	16	0.0266187	Afu7g01010-T|Afu6g12930-T|Afu4g07360-T|Afu8g03930-T|Afu6g04210-T|Afu2g03610-T|Afu6g07430-T	http://amigo.geneontology.org/cgi-bin/amigo/term_details?term=GO:0052031
microtubule-based process	Gene Ontology	GO:0007017	17	61	0.0271472	Afu1g13140-T|Afu2g03150-T|Afu1g02550-T|Afu5g13050-T|Afu1g16540-T|Afu4g13390-T|Afu3g12250-T|Afu4g04740-T|Afu7g00250-T|Afu1g07580-T|Afu1g14970-T|Afu6g08660-T|Afu3g10720-T|Afu6g02670-T|Afu7g01400-T|Afu3g09910-T|Afu1g13390-T	http://amigo.geneontology.org/cgi-bin/amigo/term_details?term=GO:0007017
protein-DNA complex assembly	Gene Ontology	GO:0065004	14	47	0.0283306	Afu2g09060-T|Afu3g06070-T|Afu3g14010-T|Afu6g04100-T|Afu5g02520-T|Afu5g08110-T|Afu3g06580-T|Afu5g02910-T|Afu2g17050-T|Afu2g06200-T|Afu6g01990-T|Afu3g06330-T|Afu6g06880-T|Afu1g15310-T	http://amigo.geneontology.org/cgi-bin/amigo/term_details?term=GO:0065004
L-methionine biosynthetic process	Gene Ontology	GO:0071265	5	9	0.0301482	Afu4g07360-T|Afu6g08720-T|Afu5g04250-T|Afu2g07620-T|Afu4g03950-T	http://amigo.geneontology.org/cgi-bin/amigo/term_details?term=GO:0071265
ribonucleoside metabolic process	Gene Ontology	GO:0009119	19	72	0.0307971	Afu6g05320-T|Afu1g06960-T|Afu2g11940-T|Afu2g05910-T|Afu1g07530-T|Afu1g15450-T|Afu5g12350-T|Afu8g02770-T|Afu7g05210-T|Afu5g06390-T|Afu2g03700-T|Afu4g04260-T|Afu2g11290-T|Afu6g07430-T|Afu2g08360-T|Afu1g10130-T|Afu4g06690-T|Afu7g02310-T|Afu2g11010-T	http://amigo.geneontology.org/cgi-bin/amigo/term_details?term=GO:0009119
glycosyl compound biosynthetic process	Gene Ontology	GO:1901659	11	34	0.0319637	Afu2g11940-T|Afu5g11650-T|Afu1g07530-T|Afu7g05210-T|Afu5g06390-T|Afu4g04260-T|Afu2g11290-T|Afu2g08360-T|Afu1g15450-T|Afu7g02310-T|Afu2g11010-T	http://amigo.geneontology.org/cgi-bin/amigo/term_details?term=GO:1901659
double-strand break repair via homologous recombination	Gene Ontology	GO:0000724	8	21	0.0325651	Afu2g09060-T|Afu2g03910-T|Afu3g02390-T|Afu6g13290-T|Afu5g02520-T|Afu3g14010-T|Afu1g14695-T|Afu1g06360-T	http://amigo.geneontology.org/cgi-bin/amigo/term_details?term=GO:0000724
pyruvate metabolic process	Gene Ontology	GO:0006090	8	21	0.0325651	Afu1g06960-T|Afu2g05910-T|Afu7g05720-T|Afu3g08270-T|Afu4g07710-T|Afu6g07430-T|Afu7g01000-T|Afu3g04170-T	http://amigo.geneontology.org/cgi-bin/amigo/term_details?term=GO:0006090
response to UV	Gene Ontology	GO:0009411	8	21	0.0325651	Afu3g08300-T|Afu2g03910-T|Afu1g12940-T|Afu3g06060-T|Afu2g16600-T|Afu2g12250-T|Afu4g07970-T|Afu5g01870-T	http://amigo.geneontology.org/cgi-bin/amigo/term_details?term=GO:0009411
regulation of translational fidelity	Gene Ontology	GO:0006450	4	6	0.0344688	Afu1g09440-T|Afu8g03930-T|Afu7g01460-T|Afu6g13250-T	http://amigo.geneontology.org/cgi-bin/amigo/term_details?term=GO:0006450
unsaturated fatty acid biosynthetic process	Gene Ontology	GO:0006636	4	6	0.0344688	Afu3g12120-T|Afu1g12530-T|Afu7g05920-T|Afu2g07520-T	http://amigo.geneontology.org/cgi-bin/amigo/term_details?term=GO:0006636
lysine biosynthetic process	Gene Ontology	GO:0009085	4	6	0.0344688	Afu4g11340-T|Afu4g10460-T|Afu3g11710-T|Afu5g08890-T	http://amigo.geneontology.org/cgi-bin/amigo/term_details?term=GO:0009085
unsaturated fatty acid metabolic process	Gene Ontology	GO:0033559	4	6	0.0344688	Afu3g12120-T|Afu1g12530-T|Afu7g05920-T|Afu2g07520-T	http://amigo.geneontology.org/cgi-bin/amigo/term_details?term=GO:0033559
DNA replication preinitiation complex	Gene Ontology	GO:0031261	4	6	0.0344688	Afu3g14010-T|Afu2g09060-T|Afu5g02520-T|Afu5g08110-T	http://amigo.geneontology.org/cgi-bin/amigo/term_details?term=GO:0031261
ribosomal small subunit export from nucleus	Gene Ontology	GO:0000056	4	6	0.0344688	Afu5g06520-T|Afu7g04490-T|Afu3g11110-T|Afu1g05630-T	http://amigo.geneontology.org/cgi-bin/amigo/term_details?term=GO:0000056
cytoplasmic translational initiation	Gene Ontology	GO:0002183	4	6	0.0344688	Afu1g09330-T|Afu3g08640-T|Afu7g03980-T|Afu4g07660-T	http://amigo.geneontology.org/cgi-bin/amigo/term_details?term=GO:0002183
pseudouridine synthesis	Gene Ontology	GO:0001522	4	6	0.0344688	Afu2g16360-T|Afu1g13880-T|Afu5g05710-T|Afu1g16730-T	http://amigo.geneontology.org/cgi-bin/amigo/term_details?term=GO:0001522
acetyl-CoA biosynthetic process	Gene Ontology	GO:0006085	4	6	0.0344688	Afu7g05720-T|Afu1g06960-T|Afu3g08270-T|Afu3g04170-T	http://amigo.geneontology.org/cgi-bin/amigo/term_details?term=GO:0006085
thioester biosynthetic process	Gene Ontology	GO:0035384	4	6	0.0344688	Afu7g05720-T|Afu1g06960-T|Afu3g08270-T|Afu3g04170-T	http://amigo.geneontology.org/cgi-bin/amigo/term_details?term=GO:0035384
lysine metabolic process	Gene Ontology	GO:0006553	4	6	0.0344688	Afu4g11340-T|Afu4g10460-T|Afu3g11710-T|Afu5g08890-T	http://amigo.geneontology.org/cgi-bin/amigo/term_details?term=GO:0006553
acyl-CoA biosynthetic process	Gene Ontology	GO:0071616	4	6	0.0344688	Afu7g05720-T|Afu1g06960-T|Afu3g08270-T|Afu3g04170-T	http://amigo.geneontology.org/cgi-bin/amigo/term_details?term=GO:0071616
cellular lipid biosynthetic process	Gene Ontology	GO:0097384	9	26	0.0370577	Afu7g01220-T|Afu2g03700-T|Afu2g11550-T|Afu1g04720-T|Afu5g02450-T|Afu2g07680-T|Afu4g11500-T|Afu4g03630-T|Afu4g07780-T	http://amigo.geneontology.org/cgi-bin/amigo/term_details?term=GO:0097384
ergosterol biosynthetic process	Gene Ontology	GO:0006696	9	26	0.0370577	Afu7g01220-T|Afu2g03700-T|Afu2g11550-T|Afu1g04720-T|Afu5g02450-T|Afu2g07680-T|Afu4g11500-T|Afu4g03630-T|Afu4g07780-T	http://amigo.geneontology.org/cgi-bin/amigo/term_details?term=GO:0006696
phytosteroid biosynthetic process	Gene Ontology	GO:0016129	9	26	0.0370577	Afu7g01220-T|Afu2g03700-T|Afu2g11550-T|Afu1g04720-T|Afu5g02450-T|Afu2g07680-T|Afu4g11500-T|Afu4g03630-T|Afu4g07780-T	http://amigo.geneontology.org/cgi-bin/amigo/term_details?term=GO:0016129
cellular alcohol biosynthetic process	Gene Ontology	GO:0044108	9	26	0.0370577	Afu7g01220-T|Afu2g03700-T|Afu2g11550-T|Afu1g04720-T|Afu5g02450-T|Afu2g07680-T|Afu4g11500-T|Afu4g03630-T|Afu4g07780-T	http://amigo.geneontology.org/cgi-bin/amigo/term_details?term=GO:0044108
ribonucleotide metabolic process	Gene Ontology	GO:0009259	20	79	0.0374109	Afu2g10855-T|Afu1g13140-T|Afu1g06960-T|Afu2g11940-T|Afu2g05910-T|Afu4g07690-T|Afu5g12350-T|Afu6g11620-T|Afu7g05210-T|Afu4g06690-T|Afu2g03700-T|Afu1g07530-T|Afu1g15450-T|Afu6g07430-T|Afu2g08360-T|Afu5g04100-T|Afu4g12600-T|Afu6g04730-T|Afu7g02310-T|Afu2g11010-T	http://amigo.geneontology.org/cgi-bin/amigo/term_details?term=GO:0009259
cytokinesis	Gene Ontology	GO:0000910	18	69	0.0378484	Afu3g07110-T|Afu2g03640-T|Afu3g10250-T|Afu4g04180-T|Afu4g10790-T|Afu5g03080-T|Afu3g12250-T|Afu2g11270-T|Afu5g11600-T|Afu1g07320-T|Afu7g05670-T|Afu4g07460-T|Afu6g12920-T|Afu6g02670-T|Afu2g08470-T|Afu1g16780-T|Afu3g09910-T|Afu1g13390-T	http://amigo.geneontology.org/cgi-bin/amigo/term_details?term=GO:0000910
regulation of G2/M transition of mitotic cell cycle	Gene Ontology	GO:0010389	8	22	0.0393681	Afu4g04740-T|Afu3g08300-T|Afu1g12940-T|Afu3g12250-T|Afu3g09560-T|Afu4g04390-T|Afu3g09550-T|Afu6g02670-T	http://amigo.geneontology.org/cgi-bin/amigo/term_details?term=GO:0010389
regulation of cell cycle G2/M phase transition	Gene Ontology	GO:1902749	8	22	0.0393681	Afu4g04740-T|Afu3g08300-T|Afu1g12940-T|Afu3g12250-T|Afu3g09560-T|Afu4g04390-T|Afu3g09550-T|Afu6g02670-T	http://amigo.geneontology.org/cgi-bin/amigo/term_details?term=GO:1902749
glycosyl compound metabolic process	Gene Ontology	GO:1901657	22	90	0.0399567	Afu2g05910-T|Afu2g03700-T|Afu4g10790-T|Afu4g04260-T|Afu2g11290-T|Afu5g06390-T|Afu2g11010-T|Afu6g05320-T|Afu6g08720-T|Afu1g06960-T|Afu1g07530-T|Afu5g12350-T|Afu8g02770-T|Afu4g06690-T|Afu6g07430-T|Afu7g02310-T|Afu2g11940-T|Afu1g15450-T|Afu5g11650-T|Afu7g05210-T|Afu2g08360-T|Afu1g10130-T	http://amigo.geneontology.org/cgi-bin/amigo/term_details?term=GO:1901657
symbiosis, encompassing mutualism through parasitism	Gene Ontology	GO:0044403	13	45	0.0403212	Afu7g01010-T|Afu6g12930-T|Afu4g07360-T|Afu3g00590-T|Afu6g10410-T|Afu8g03930-T|Afu1g03600-T|Afu6g04210-T|Afu1g14570-T|Afu2g03610-T|Afu6g07430-T|Afu2g08360-T|Afu1g06390-T	http://amigo.geneontology.org/cgi-bin/amigo/term_details?term=GO:0044403
deoxyribonucleotide metabolic process	Gene Ontology	GO:0009262	5	10	0.0403655	Afu5g12350-T|Afu4g06690-T|Afu1g02890-T|Afu5g03460-T|Afu4g04270-T	http://amigo.geneontology.org/cgi-bin/amigo/term_details?term=GO:0009262
maintenance of DNA repeat elements	Gene Ontology	GO:0043570	5	10	0.0403655	Afu3g05530-T|Afu3g09050-T|Afu4g10630-T|Afu6g08350-T|Afu3g09850-T	http://amigo.geneontology.org/cgi-bin/amigo/term_details?term=GO:0043570
regulation of translational elongation	Gene Ontology	GO:0006448	5	10	0.0403655	Afu2g13530-T|Afu1g09440-T|Afu8g03930-T|Afu7g01460-T|Afu6g13250-T	http://amigo.geneontology.org/cgi-bin/amigo/term_details?term=GO:0006448
tRNA methylation	Gene Ontology	GO:0030488	5	10	0.0403655	Afu1g14180-T|Afu4g12140-T|Afu1g07570-T|Afu5g01850-T|Afu5g11650-T	http://amigo.geneontology.org/cgi-bin/amigo/term_details?term=GO:0030488
purine nucleoside monophosphate biosynthetic process	Gene Ontology	GO:0009127	10	31	0.0403859	Afu2g10855-T|Afu2g11940-T|Afu4g07690-T|Afu6g11620-T|Afu1g07530-T|Afu1g15450-T|Afu3g15090-T|Afu4g12600-T|Afu6g04730-T|Afu7g02310-T	http://amigo.geneontology.org/cgi-bin/amigo/term_details?term=GO:0009127
glutamine family amino acid metabolic process	Gene Ontology	GO:0009064	10	31	0.0403859	Afu3g00690-T|Afu3g08660-T|Afu2g04310-T|Afu7g02230-T|Afu1g07380-T|Afu6g02910-T|Afu6g08720-T|Afu2g12470-T|Afu5g14770-T|Afu3g04170-T	http://amigo.geneontology.org/cgi-bin/amigo/term_details?term=GO:0009064
interaction with host	Gene Ontology	GO:0051701	10	31	0.0403859	Afu7g01010-T|Afu6g12930-T|Afu4g07360-T|Afu3g00590-T|Afu6g10410-T|Afu8g03930-T|Afu6g04210-T|Afu2g03610-T|Afu6g07430-T|Afu1g06390-T	http://amigo.geneontology.org/cgi-bin/amigo/term_details?term=GO:0051701
purine ribonucleoside monophosphate biosynthetic process	Gene Ontology	GO:0009168	10	31	0.0403859	Afu2g10855-T|Afu2g11940-T|Afu4g07690-T|Afu6g11620-T|Afu1g07530-T|Afu1g15450-T|Afu3g15090-T|Afu4g12600-T|Afu6g04730-T|Afu7g02310-T	http://amigo.geneontology.org/cgi-bin/amigo/term_details?term=GO:0009168
nucleoside diphosphate metabolic process	Gene Ontology	GO:0009132	7	18	0.0411544	Afu1g06960-T|Afu2g05910-T|Afu1g07530-T|Afu5g12350-T|Afu4g06690-T|Afu6g07430-T|Afu5g03460-T	http://amigo.geneontology.org/cgi-bin/amigo/term_details?term=GO:0009132
mitotic cell cycle process	Gene Ontology	GO:1903047	41	193	0.0413204	Afu3g07680-T|Afu2g11270-T|Afu1g14730-T|Afu2g06200-T|Afu4g12160-T|Afu5g11600-T|Afu3g09910-T|Afu3g05530-T|Afu4g07460-T|Afu7g01400-T|Afu4g04740-T|Afu4g04390-T|Afu2g07620-T|Afu6g02670-T|Afu2g02170-T|Afu1g16780-T|Afu4g10630-T|Afu6g13290-T|Afu1g13390-T|Afu2g10730-T|Afu5g03080-T|Afu3g09560-T|Afu5g01870-T|Afu3g10250-T|Afu3g09550-T|Afu1g14695-T|Afu5g13370-T|Afu3g07110-T|Afu2g03640-T|Afu2g09060-T|Afu3g0830…	http://amigo.geneontology.org/cgi-bin/amigo/term_details?term=GO:1903047
snoRNA metabolic process	Gene Ontology	GO:0016074	6	14	0.04185	Afu5g05710-T|Afu5g14010-T|Afu3g09880-T|Afu7g03690-T|Afu4g13330-T|Afu1g14220-T	http://amigo.geneontology.org/cgi-bin/amigo/term_details?term=GO:0016074
positive regulation of cellular catabolic process	Gene Ontology	GO:0031331	6	14	0.04185	Afu3g00690-T|Afu5g14530-T|Afu3g11360-T|Afu7g04490-T|Afu2g14810-T|Afu7g02230-T	http://amigo.geneontology.org/cgi-bin/amigo/term_details?term=GO:0031331
coenzyme metabolic process	Gene Ontology	GO:0006732	27	117	0.0422817	Afu1g13500-T|Afu3g06120-T|Afu2g05910-T|Afu4g13960-T|Afu2g03700-T|Afu3g08650-T|Afu5g03900-T|Afu6g05320-T|Afu1g06960-T|Afu3g08270-T|Afu4g07130-T|Afu6g07430-T|Afu7g01000-T|Afu2g14497-T|Afu8g05330-T|Afu6g00660-T|Afu7g05720-T|Afu4g09830-T|Afu2g09910-T|Afu5g03140-T|Afu4g07780-T|Afu7g01010-T|Afu1g10630-T|Afu5g04230-T|Afu4g10370-T|Afu5g10310-T|Afu3g04170-T	http://amigo.geneontology.org/cgi-bin/amigo/term_details?term=GO:0006732
pigment biosynthetic process	Gene Ontology	GO:0046148	11	36	0.042798	Afu1g12490-T|Afu2g10855-T|Afu5g03900-T|Afu4g07360-T|Afu2g17530-T|Afu3g13120-T|Afu3g08650-T|Afu2g17540-T|Afu6g04730-T|Afu7g02310-T|Afu8g05330-T	http://amigo.geneontology.org/cgi-bin/amigo/term_details?term=GO:0046148
sterol metabolic process	Gene Ontology	GO:0016125	11	36	0.042798	Afu7g01220-T|Afu2g03700-T|Afu2g11550-T|Afu1g04720-T|Afu4g07130-T|Afu5g02450-T|Afu2g07680-T|Afu8g02590-T|Afu4g11500-T|Afu4g03630-T|Afu4g07780-T	http://amigo.geneontology.org/cgi-bin/amigo/term_details?term=GO:0016125
purine-containing compound metabolic process	Gene Ontology	GO:0072521	22	91	0.0435827	Afu2g05910-T|Afu1g13140-T|Afu2g03700-T|Afu3g08650-T|Afu2g11940-T|Afu6g05320-T|Afu2g10855-T|Afu1g06960-T|Afu4g07360-T|Afu6g11620-T|Afu5g06390-T|Afu2g03610-T|Afu6g07430-T|Afu6g04730-T|Afu7g02310-T|Afu8g05330-T|Afu1g15450-T|Afu4g12600-T|Afu4g07690-T|Afu1g07530-T|Afu5g04100-T|Afu1g10130-T	http://amigo.geneontology.org/cgi-bin/amigo/term_details?term=GO:0072521
phytosteroid metabolic process	Gene Ontology	GO:0016128	9	27	0.0437503	Afu7g01220-T|Afu2g03700-T|Afu2g11550-T|Afu1g04720-T|Afu5g02450-T|Afu2g07680-T|Afu4g11500-T|Afu4g03630-T|Afu4g07780-T	http://amigo.geneontology.org/cgi-bin/amigo/term_details?term=GO:0016128
ergosterol metabolic process	Gene Ontology	GO:0008204	9	27	0.0437503	Afu7g01220-T|Afu2g03700-T|Afu2g11550-T|Afu1g04720-T|Afu5g02450-T|Afu2g07680-T|Afu4g11500-T|Afu4g03630-T|Afu4g07780-T	http://amigo.geneontology.org/cgi-bin/amigo/term_details?term=GO:0008204
purine nucleotide biosynthetic process	Gene Ontology	GO:0006164	12	41	0.0444916	Afu2g10855-T|Afu1g13140-T|Afu2g11940-T|Afu4g07690-T|Afu6g11620-T|Afu1g07530-T|Afu2g03610-T|Afu1g15450-T|Afu5g04100-T|Afu4g12600-T|Afu6g04730-T|Afu7g02310-T	http://amigo.geneontology.org/cgi-bin/amigo/term_details?term=GO:0006164
microtubule cytoskeleton organization	Gene Ontology	GO:0000226	13	46	0.0456204	Afu2g03150-T|Afu1g02550-T|Afu1g16540-T|Afu3g12250-T|Afu4g04740-T|Afu7g00250-T|Afu1g07580-T|Afu1g14970-T|Afu3g09910-T|Afu6g02670-T|Afu7g01400-T|Afu6g08660-T|Afu1g13390-T	http://amigo.geneontology.org/cgi-bin/amigo/term_details?term=GO:0000226
organelle organization	Gene Ontology	GO:0006996	110	596	0.0458521	Afu3g07680-T|Afu8g04800-T|Afu2g03150-T|Afu1g11860-T|Afu6g01990-T|Afu5g06010-T|Afu7g01400-T|Afu1g02550-T|Afu8g04790-T|Afu4g07460-T|Afu1g07450-T|Afu7g04430-T|Afu3g06330-T|Afu5g06510-T|Afu5g13470-T|Afu6g08350-T|Afu4g08110-T|Afu7g03690-T|Afu6g04510-T|Afu1g06880-T|Afu4g08010-T|Afu2g01660-T|Afu6g08660-T|Afu2g09060-T|Afu1g12940-T|Afu7g00250-T|Afu1g02060-T|Afu4g10630-T|Afu6g05174-T|Afu3g09880-T|Afu4g0757…	http://amigo.geneontology.org/cgi-bin/amigo/term_details?term=GO:0006996
ribonucleoside biosynthetic process	Gene Ontology	GO:0042455	10	32	0.0468849	Afu2g11940-T|Afu1g07530-T|Afu7g05210-T|Afu5g06390-T|Afu4g04260-T|Afu2g11290-T|Afu2g08360-T|Afu1g15450-T|Afu7g02310-T|Afu2g11010-T	http://amigo.geneontology.org/cgi-bin/amigo/term_details?term=GO:0042455
nucleoside biosynthetic process	Gene Ontology	GO:0009163	10	32	0.0468849	Afu2g11940-T|Afu1g07530-T|Afu7g05210-T|Afu5g06390-T|Afu4g04260-T|Afu2g11290-T|Afu2g08360-T|Afu1g15450-T|Afu7g02310-T|Afu2g11010-T	http://amigo.geneontology.org/cgi-bin/amigo/term_details?term=GO:0009163
steroid biosynthetic process	Gene Ontology	GO:0006694	10	32	0.0468849	Afu7g01220-T|Afu2g03700-T|Afu2g11550-T|Afu1g04720-T|Afu4g07130-T|Afu5g02450-T|Afu2g07680-T|Afu4g11500-T|Afu4g03630-T|Afu4g07780-T	http://amigo.geneontology.org/cgi-bin/amigo/term_details?term=GO:0006694
movement of cell or subcellular component	Gene Ontology	GO:0006928	8	23	0.0470566	Afu1g13140-T|Afu5g13050-T|Afu4g13390-T|Afu3g10720-T|Afu7g00250-T|Afu2g03150-T|Afu2g08360-T|Afu7g01400-T	http://amigo.geneontology.org/cgi-bin/amigo/term_details?term=GO:0006928
recombinational repair	Gene Ontology	GO:0000725	8	23	0.0470566	Afu2g09060-T|Afu2g03910-T|Afu3g02390-T|Afu6g13290-T|Afu5g02520-T|Afu3g14010-T|Afu1g14695-T|Afu1g06360-T	http://amigo.geneontology.org/cgi-bin/amigo/term_details?term=GO:0000725
response to host defenses	Gene Ontology	GO:0052200	8	23	0.0470566	Afu7g01010-T|Afu6g12930-T|Afu4g07360-T|Afu6g10410-T|Afu8g03930-T|Afu6g04210-T|Afu2g03610-T|Afu6g07430-T	http://amigo.geneontology.org/cgi-bin/amigo/term_details?term=GO:0052200
cell cycle process	Gene Ontology	GO:0022402	67	344	0.0480818	Afu3g12120-T|Afu3g09850-T|Afu3g07680-T|Afu1g12490-T|Afu1g13140-T|Afu2g11270-T|Afu7g01400-T|Afu2g07620-T|Afu4g10790-T|Afu1g10630-T|Afu1g14730-T|Afu2g06200-T|Afu6g01990-T|Afu5g08110-T|Afu4g12160-T|Afu5g11600-T|Afu3g09910-T|Afu4g04180-T|Afu3g05530-T|Afu4g04390-T|Afu4g07460-T|Afu1g02060-T|Afu3g02390-T|Afu4g04740-T|Afu6g10410-T|Afu3g06580-T|Afu5g03080-T|Afu3g09050-T|Afu5g06510-T|Afu6g02670-T|Afu2g0217…	http://amigo.geneontology.org/cgi-bin/amigo/term_details?term=GO:0022402
nucleoside metabolic process	Gene Ontology	GO:0009116	21	87	0.0483827	Afu6g05320-T|Afu4g06690-T|Afu1g06960-T|Afu2g11940-T|Afu2g05910-T|Afu1g07530-T|Afu1g15450-T|Afu5g12350-T|Afu8g02770-T|Afu7g05210-T|Afu5g06390-T|Afu2g03700-T|Afu4g10790-T|Afu4g04260-T|Afu2g11290-T|Afu6g07430-T|Afu2g08360-T|Afu1g10130-T|Afu6g08720-T|Afu7g02310-T|Afu2g11010-T	http://amigo.geneontology.org/cgi-bin/amigo/term_details?term=GO:0009116
adenine metabolic process	Gene Ontology	GO:0046083	4	7	0.0485575	Afu4g07360-T|Afu2g10855-T|Afu6g04730-T|Afu7g02310-T	http://amigo.geneontology.org/cgi-bin/amigo/term_details?term=GO:0046083
'de novo' pyrimidine nucleobase biosynthetic process	Gene Ontology	GO:0006207	4	7	0.0485575	Afu2g11010-T|Afu2g08360-T|Afu2g11290-T|Afu8g00850-T	http://amigo.geneontology.org/cgi-bin/amigo/term_details?term=GO:0006207
tRNA modification	Gene Ontology	GO:0006400	11	37	0.0490641	Afu4g12140-T|Afu1g14630-T|Afu1g07570-T|Afu5g01850-T|Afu5g11650-T|Afu6g04510-T|Afu2g16360-T|Afu4g04260-T|Afu1g14180-T|Afu1g16730-T|Afu1g14770-T	http://amigo.geneontology.org/cgi-bin/amigo/term_details?term=GO:0006400

## Sheet: GO up wt HS 60' vs wt 30ºC
#Term	Database	ID	Input number	Background number	P-Value	Input	Hyperlink
DNA repair	Gene Ontology	GO:0006281	37	123	0.000131149	Afu2g15220-T|Afu4g03840-T|Afu1g10480-T|Afu2g10820-T|Afu4g09620-T|Afu4g11140-T|Afu3g11140-T|Afu4g06260-T|Afu1g15120-T|Afu5g09000-T|Afu7g04783-T|Afu5g11580-T|Afu7g01270-T|Afu3g14550-T|Afu4g03150-T|Afu1g02700-T|Afu6g14210-T|Afu4g08900-T|Afu7g04480-T|Afu2g04860-T|Afu1g06720-T|Afu1g07620-T|Afu7g05280-T|Afu2g08540-T|Afu5g06690-T|Afu6g13340-T|Afu6g07980-T|Afu7g01280-T|Afu1g03050-T|Afu8g05820-T|Afu6g0857…	http://amigo.geneontology.org/cgi-bin/amigo/term_details?term=GO:0006281
RNA biosynthetic process	Gene Ontology	GO:0032774	107	505	0.000154566	Afu8g02700-T|Afu3g14040-T|Afu4g13130-T|Afu5g11580-T|Afu1g01590-T|Afu4g13230-T|Afu1g09350-T|Afu7g01890-T|Afu2g08840-T|Afu6g13130-T|Afu2g08540-T|Afu7g04340-T|Afu5g07530-T|Afu5g09240-T|Afu1g07510-T|Afu7g06550-T|Afu1g15910-T|Afu1g17460-T|Afu2g15790-T|Afu3g14840-T|Afu3g01880-T|Afu6g14150-T|Afu1g09950-T|Afu6g08790-T|Afu8g01990-T|Afu1g06380-T|Afu5g13080-T|Afu8g00750-T|Afu1g10850-T|Afu8g01150-T|Afu5g0165…	http://amigo.geneontology.org/cgi-bin/amigo/term_details?term=GO:0032774
nucleic acid-templated transcription	Gene Ontology	GO:0097659	106	502	0.000185485	Afu8g02700-T|Afu3g14040-T|Afu4g13130-T|Afu5g11580-T|Afu1g01590-T|Afu4g13230-T|Afu1g09350-T|Afu7g01890-T|Afu1g10540-T|Afu6g13130-T|Afu2g08540-T|Afu7g04340-T|Afu5g07530-T|Afu5g09240-T|Afu1g07510-T|Afu7g06550-T|Afu1g15910-T|Afu1g17460-T|Afu2g15790-T|Afu3g14840-T|Afu3g01880-T|Afu6g14150-T|Afu1g09950-T|Afu6g08790-T|Afu8g01990-T|Afu1g06380-T|Afu5g13080-T|Afu8g00750-T|Afu1g10850-T|Afu8g01150-T|Afu5g0165…	http://amigo.geneontology.org/cgi-bin/amigo/term_details?term=GO:0097659
transcription, DNA-templated	Gene Ontology	GO:0006351	106	502	0.000185485	Afu8g02700-T|Afu3g14040-T|Afu4g13130-T|Afu5g11580-T|Afu1g01590-T|Afu4g13230-T|Afu1g09350-T|Afu7g01890-T|Afu1g10540-T|Afu6g13130-T|Afu2g08540-T|Afu7g04340-T|Afu5g07530-T|Afu5g09240-T|Afu1g07510-T|Afu7g06550-T|Afu1g15910-T|Afu1g17460-T|Afu2g15790-T|Afu3g14840-T|Afu3g01880-T|Afu6g14150-T|Afu1g09950-T|Afu6g08790-T|Afu8g01990-T|Afu1g06380-T|Afu5g13080-T|Afu8g00750-T|Afu1g10850-T|Afu8g01150-T|Afu5g0165…	http://amigo.geneontology.org/cgi-bin/amigo/term_details?term=GO:0006351
nucleobase-containing compound biosynthetic process	Gene Ontology	GO:0034654	121	607	0.000492718	Afu8g02700-T|Afu3g14040-T|Afu4g13130-T|Afu5g11580-T|Afu7g01270-T|Afu1g01590-T|Afu4g13230-T|Afu1g09350-T|Afu2g05820-T|Afu1g10540-T|Afu3g11630-T|Afu6g13130-T|Afu2g08540-T|Afu3g04120-T|Afu5g07530-T|Afu5g09240-T|Afu2g08840-T|Afu7g06550-T|Afu1g15910-T|Afu1g17460-T|Afu2g15790-T|Afu3g14840-T|Afu3g01880-T|Afu2g17880-T|Afu6g14150-T|Afu1g02480-T|Afu1g09950-T|Afu6g08790-T|Afu8g01990-T|Afu1g06380-T|Afu5g1308…	http://amigo.geneontology.org/cgi-bin/amigo/term_details?term=GO:0034654
DNA metabolic process	Gene Ontology	GO:0006259	48	193	0.000650289	Afu2g15220-T|Afu4g03840-T|Afu1g10480-T|Afu2g10820-T|Afu4g09620-T|Afu4g06490-T|Afu6g10490-T|Afu3g11140-T|Afu4g06260-T|Afu1g15120-T|Afu5g09000-T|Afu7g04783-T|Afu5g11580-T|Afu7g01270-T|Afu3g14550-T|Afu7g05530-T|Afu4g03150-T|Afu1g02700-T|Afu7g01280-T|Afu3g04120-T|Afu4g08900-T|Afu3g11630-T|Afu7g04480-T|Afu2g04860-T|Afu7g05280-T|Afu5g13920-T|Afu1g06720-T|Afu1g07620-T|Afu5g04170-T|Afu1g10850-T|Afu4g0723…	http://amigo.geneontology.org/cgi-bin/amigo/term_details?term=GO:0006259
cellular response to DNA damage stimulus	Gene Ontology	GO:0006974	40	152	0.000717366	Afu2g15220-T|Afu4g03840-T|Afu1g10480-T|Afu2g10820-T|Afu4g09620-T|Afu1g09950-T|Afu4g11140-T|Afu3g11140-T|Afu4g06260-T|Afu1g15120-T|Afu5g09000-T|Afu7g04783-T|Afu5g11580-T|Afu7g01270-T|Afu3g14550-T|Afu4g03150-T|Afu1g02700-T|Afu7g01280-T|Afu4g08900-T|Afu7g04480-T|Afu2g04860-T|Afu1g06720-T|Afu1g07620-T|Afu7g05280-T|Afu2g08540-T|Afu5g06690-T|Afu6g13340-T|Afu6g07980-T|Afu5g09540-T|Afu6g14210-T|Afu1g0305…	http://amigo.geneontology.org/cgi-bin/amigo/term_details?term=GO:0006974
regulation of nucleic acid-templated transcription	Gene Ontology	GO:1903506	88	420	0.000794685	Afu8g02700-T|Afu3g14040-T|Afu4g13130-T|Afu5g11580-T|Afu1g01590-T|Afu4g13230-T|Afu1g10540-T|Afu7g04340-T|Afu5g09240-T|Afu1g15910-T|Afu1g17460-T|Afu2g15790-T|Afu3g14840-T|Afu3g01880-T|Afu6g14150-T|Afu1g09950-T|Afu6g08790-T|Afu8g01990-T|Afu5g13080-T|Afu8g00750-T|Afu5g01650-T|Afu1g13310-T|Afu2g17880-T|Afu1g02590-T|Afu3g02920-T|Afu1g10850-T|Afu8g01440-T|Afu2g03810-T|Afu2g13770-T|Afu5g09540-T|Afu4g0660…	http://amigo.geneontology.org/cgi-bin/amigo/term_details?term=GO:1903506
regulation of RNA biosynthetic process	Gene Ontology	GO:2001141	88	420	0.000794685	Afu8g02700-T|Afu3g14040-T|Afu4g13130-T|Afu5g11580-T|Afu1g01590-T|Afu4g13230-T|Afu1g10540-T|Afu7g04340-T|Afu5g09240-T|Afu1g15910-T|Afu1g17460-T|Afu2g15790-T|Afu3g14840-T|Afu3g01880-T|Afu6g14150-T|Afu1g09950-T|Afu6g08790-T|Afu8g01990-T|Afu5g13080-T|Afu8g00750-T|Afu5g01650-T|Afu1g13310-T|Afu2g17880-T|Afu1g02590-T|Afu3g02920-T|Afu1g10850-T|Afu8g01440-T|Afu2g03810-T|Afu2g13770-T|Afu5g09540-T|Afu4g0660…	http://amigo.geneontology.org/cgi-bin/amigo/term_details?term=GO:2001141
regulation of transcription, DNA-templated	Gene Ontology	GO:0006355	88	420	0.000794685	Afu8g02700-T|Afu3g14040-T|Afu4g13130-T|Afu5g11580-T|Afu1g01590-T|Afu4g13230-T|Afu1g10540-T|Afu7g04340-T|Afu5g09240-T|Afu1g15910-T|Afu1g17460-T|Afu2g15790-T|Afu3g14840-T|Afu3g01880-T|Afu6g14150-T|Afu1g09950-T|Afu6g08790-T|Afu8g01990-T|Afu5g13080-T|Afu8g00750-T|Afu5g01650-T|Afu1g13310-T|Afu2g17880-T|Afu1g02590-T|Afu3g02920-T|Afu1g10850-T|Afu8g01440-T|Afu2g03810-T|Afu2g13770-T|Afu5g09540-T|Afu4g0660…	http://amigo.geneontology.org/cgi-bin/amigo/term_details?term=GO:0006355
regulation of RNA metabolic process	Gene Ontology	GO:0051252	89	430	0.00102935	Afu8g02700-T|Afu3g14040-T|Afu4g13130-T|Afu5g11580-T|Afu1g01590-T|Afu4g13230-T|Afu1g10540-T|Afu7g04340-T|Afu5g09240-T|Afu1g15910-T|Afu1g17460-T|Afu2g15790-T|Afu3g14840-T|Afu3g01880-T|Afu6g14150-T|Afu1g09950-T|Afu6g08790-T|Afu8g01990-T|Afu5g13080-T|Afu8g00750-T|Afu5g01650-T|Afu1g13310-T|Afu2g17880-T|Afu1g02590-T|Afu3g02920-T|Afu1g10850-T|Afu8g01440-T|Afu2g03810-T|Afu2g13770-T|Afu5g09540-T|Afu4g0660…	http://amigo.geneontology.org/cgi-bin/amigo/term_details?term=GO:0051252
nucleic acid metabolic process	Gene Ontology	GO:0090304	164	887	0.00110644	Afu2g15220-T|Afu4g03840-T|Afu3g14040-T|Afu1g10480-T|Afu1g12570-T|Afu4g09620-T|Afu7g05530-T|Afu4g11140-T|Afu4g13130-T|Afu1g15120-T|Afu5g11580-T|Afu7g01270-T|Afu1g01590-T|Afu4g13230-T|Afu1g09350-T|Afu7g01890-T|Afu7g01280-T|Afu3g11630-T|Afu1g07620-T|Afu6g13130-T|Afu3g02380-T|Afu2g08540-T|Afu3g04120-T|Afu5g07530-T|Afu5g09240-T|Afu2g08840-T|Afu7g06550-T|Afu1g15910-T|Afu1g17460-T|Afu2g15790-T|Afu3g1484…	http://amigo.geneontology.org/cgi-bin/amigo/term_details?term=GO:0090304
regulation of nucleobase-containing compound metabolic process	Gene Ontology	GO:0019219	93	455	0.00112468	Afu8g02700-T|Afu3g14040-T|Afu4g13130-T|Afu5g11580-T|Afu1g01590-T|Afu4g13230-T|Afu1g10540-T|Afu3g11630-T|Afu7g04340-T|Afu5g09240-T|Afu1g15910-T|Afu1g17460-T|Afu2g15790-T|Afu3g14840-T|Afu3g01880-T|Afu2g17880-T|Afu6g14150-T|Afu1g09950-T|Afu6g08790-T|Afu8g01990-T|Afu5g13080-T|Afu8g00750-T|Afu5g01650-T|Afu1g13310-T|Afu5g13920-T|Afu1g02590-T|Afu3g02920-T|Afu1g10850-T|Afu5g01460-T|Afu8g01440-T|Afu2g0381…	http://amigo.geneontology.org/cgi-bin/amigo/term_details?term=GO:0019219
regulation of macromolecule biosynthetic process	Gene Ontology	GO:0010556	94	472	0.00210968	Afu8g02700-T|Afu3g14040-T|Afu4g13130-T|Afu1g16310-T|Afu5g11580-T|Afu1g01590-T|Afu4g13230-T|Afu1g10540-T|Afu3g11630-T|Afu7g04340-T|Afu5g09240-T|Afu1g15910-T|Afu1g17460-T|Afu2g15790-T|Afu3g14840-T|Afu3g01880-T|Afu2g17880-T|Afu6g14150-T|Afu6g04050-T|Afu1g09950-T|Afu6g08790-T|Afu8g01990-T|Afu5g13080-T|Afu8g00750-T|Afu5g01650-T|Afu1g13310-T|Afu5g13920-T|Afu1g02590-T|Afu3g02920-T|Afu1g10850-T|Afu5g0146…	http://amigo.geneontology.org/cgi-bin/amigo/term_details?term=GO:0010556
regulation of cellular macromolecule biosynthetic process	Gene Ontology	GO:2000112	94	472	0.00210968	Afu8g02700-T|Afu3g14040-T|Afu4g13130-T|Afu1g16310-T|Afu5g11580-T|Afu1g01590-T|Afu4g13230-T|Afu1g10540-T|Afu3g11630-T|Afu7g04340-T|Afu5g09240-T|Afu1g15910-T|Afu1g17460-T|Afu2g15790-T|Afu3g14840-T|Afu3g01880-T|Afu2g17880-T|Afu6g14150-T|Afu6g04050-T|Afu1g09950-T|Afu6g08790-T|Afu8g01990-T|Afu5g13080-T|Afu8g00750-T|Afu5g01650-T|Afu1g13310-T|Afu5g13920-T|Afu1g02590-T|Afu3g02920-T|Afu1g10850-T|Afu5g0146…	http://amigo.geneontology.org/cgi-bin/amigo/term_details?term=GO:2000112
nucleotide-excision repair	Gene Ontology	GO:0006289	12	27	0.00213705	Afu4g03840-T|Afu2g10820-T|Afu5g11580-T|Afu4g09620-T|Afu3g14550-T|Afu2g08540-T|Afu5g06690-T|Afu6g07500-T|Afu6g10530-T|Afu4g08900-T|Afu4g06260-T|Afu2g04860-T	http://amigo.geneontology.org/cgi-bin/amigo/term_details?term=GO:0006289
cellular amide catabolic process	Gene Ontology	GO:0043605	9	16	0.00228727	Afu1g03860-T|Afu1g13210-T|Afu2g08830-T|Afu3g08050-T|Afu2g02250-T|Afu3g12560-T|Afu1g10540-T|Afu1g15520-T|Afu6g08000-T	http://amigo.geneontology.org/cgi-bin/amigo/term_details?term=GO:0043605
regulation of nitrogen compound metabolic process	Gene Ontology	GO:0051171	99	506	0.00260627	Afu8g02700-T|Afu3g14040-T|Afu4g13130-T|Afu1g16310-T|Afu5g11580-T|Afu1g01590-T|Afu4g13230-T|Afu1g10540-T|Afu3g11630-T|Afu3g04120-T|Afu5g09240-T|Afu1g15910-T|Afu1g17460-T|Afu2g15790-T|Afu3g14840-T|Afu3g01880-T|Afu2g17880-T|Afu6g14150-T|Afu6g04050-T|Afu1g09950-T|Afu6g08790-T|Afu8g01990-T|Afu3g11430-T|Afu5g13080-T|Afu8g00750-T|Afu5g01650-T|Afu1g13310-T|Afu5g13920-T|Afu1g02590-T|Afu3g02920-T|Afu1g1085…	http://amigo.geneontology.org/cgi-bin/amigo/term_details?term=GO:0051171
regulation of gene expression	Gene Ontology	GO:0010468	92	468	0.00324041	Afu8g02700-T|Afu3g14040-T|Afu4g13130-T|Afu1g16310-T|Afu5g11580-T|Afu1g01590-T|Afu4g13230-T|Afu1g10540-T|Afu7g04340-T|Afu1g15760-T|Afu5g09240-T|Afu1g15910-T|Afu1g17460-T|Afu2g15790-T|Afu3g14840-T|Afu3g01880-T|Afu6g14150-T|Afu6g04050-T|Afu1g09950-T|Afu6g08790-T|Afu8g01990-T|Afu5g13080-T|Afu8g00750-T|Afu5g01650-T|Afu1g13310-T|Afu2g17880-T|Afu1g02590-T|Afu3g02920-T|Afu1g10850-T|Afu8g01440-T|Afu2g0381…	http://amigo.geneontology.org/cgi-bin/amigo/term_details?term=GO:0010468
regulation of cellular biosynthetic process	Gene Ontology	GO:0031326	97	502	0.00393366	Afu8g02700-T|Afu3g14040-T|Afu4g13130-T|Afu1g16310-T|Afu5g11580-T|Afu1g01590-T|Afu4g13230-T|Afu1g10540-T|Afu3g11630-T|Afu3g04120-T|Afu5g09240-T|Afu1g15910-T|Afu1g17460-T|Afu2g15790-T|Afu3g14840-T|Afu3g01880-T|Afu2g17880-T|Afu6g14150-T|Afu6g04050-T|Afu1g09950-T|Afu6g08790-T|Afu8g01990-T|Afu5g13080-T|Afu8g00750-T|Afu5g01650-T|Afu1g13310-T|Afu5g13920-T|Afu1g02590-T|Afu3g02920-T|Afu1g10850-T|Afu5g0146…	http://amigo.geneontology.org/cgi-bin/amigo/term_details?term=GO:0031326
regulation of biosynthetic process	Gene Ontology	GO:0009889	97	509	0.0055322	Afu8g02700-T|Afu3g14040-T|Afu4g13130-T|Afu1g16310-T|Afu5g11580-T|Afu1g01590-T|Afu4g13230-T|Afu1g10540-T|Afu3g11630-T|Afu3g04120-T|Afu5g09240-T|Afu1g15910-T|Afu1g17460-T|Afu2g15790-T|Afu3g14840-T|Afu3g01880-T|Afu2g17880-T|Afu6g14150-T|Afu6g04050-T|Afu1g09950-T|Afu6g08790-T|Afu8g01990-T|Afu5g13080-T|Afu8g00750-T|Afu5g01650-T|Afu1g13310-T|Afu5g13920-T|Afu1g02590-T|Afu3g02920-T|Afu1g10850-T|Afu5g0146…	http://amigo.geneontology.org/cgi-bin/amigo/term_details?term=GO:0009889
DNA biosynthetic process	Gene Ontology	GO:0071897	11	28	0.00674837	Afu3g11140-T|Afu6g08570-T|Afu7g01270-T|Afu5g09000-T|Afu2g08840-T|Afu1g02700-T|Afu1g13230-T|Afu5g13920-T|Afu6g07980-T|Afu3g11630-T|Afu6g14210-T	http://amigo.geneontology.org/cgi-bin/amigo/term_details?term=GO:0071897
anion transport	Gene Ontology	GO:0006820	17	56	0.00758141	Afu5g15010-T|Afu3g07990-T|Afu5g10630-T|Afu8g01850-T|Afu5g00930-T|Afu2g16210-T|Afu2g08800-T|Afu5g07970-T|Afu3g03010-T|Afu7g05910-T|Afu2g08900-T|Afu3g01560-T|Afu3g10880-T|Afu8g04630-T|Afu1g04780-T|Afu2g15090-T|Afu1g17470-T	http://amigo.geneontology.org/cgi-bin/amigo/term_details?term=GO:0006820
cellular catabolic process	Gene Ontology	GO:0044248	68	342	0.00846645	Afu5g08940-T|Afu8g02700-T|Afu3g00690-T|Afu1g11630-T|Afu1g12080-T|Afu6g04040-T|Afu1g01590-T|Afu1g15420-T|Afu2g14130-T|Afu8g01990-T|Afu1g11620-T|Afu6g11430-T|Afu6g04750-T|Afu3g11430-T|Afu2g11180-T|Afu2g10900-T|Afu5g01750-T|Afu7g06490-T|Afu5g07040-T|Afu8g07070-T|Afu5g09130-T|Afu1g05570-T|Afu1g03860-T|Afu4g13530-T|Afu4g09840-T|Afu1g13210-T|Afu5g07510-T|Afu7g01320-T|Afu1g10540-T|Afu1g15520-T|Afu2g1174…	http://amigo.geneontology.org/cgi-bin/amigo/term_details?term=GO:0044248
aromatic compound biosynthetic process	Gene Ontology	GO:0019438	128	714	0.00931609	Afu8g02700-T|Afu3g14040-T|Afu5g11110-T|Afu4g13130-T|Afu5g11580-T|Afu7g01270-T|Afu1g01590-T|Afu4g13230-T|Afu1g09350-T|Afu7g01890-T|Afu1g10540-T|Afu3g11630-T|Afu6g13130-T|Afu2g08540-T|Afu3g04120-T|Afu5g07530-T|Afu5g09240-T|Afu2g08840-T|Afu7g06550-T|Afu1g15910-T|Afu1g17460-T|Afu2g15790-T|Afu3g14840-T|Afu3g01880-T|Afu2g17880-T|Afu6g14150-T|Afu1g02480-T|Afu1g09950-T|Afu6g08790-T|Afu8g01990-T|Afu6g0302…	http://amigo.geneontology.org/cgi-bin/amigo/term_details?term=GO:0019438
translesion synthesis	Gene Ontology	GO:0019985	6	10	0.00996186	Afu6g14210-T|Afu6g08570-T|Afu7g01270-T|Afu1g02700-T|Afu2g08840-T|Afu5g09000-T	http://amigo.geneontology.org/cgi-bin/amigo/term_details?term=GO:0019985
regulation of cellular amide catabolic process	Gene Ontology	GO:0034251	5	7	0.011279	Afu3g08050-T|Afu1g03860-T|Afu1g10540-T|Afu6g08000-T|Afu2g08830-T	http://amigo.geneontology.org/cgi-bin/amigo/term_details?term=GO:0034251
catabolic process	Gene Ontology	GO:0009056	83	439	0.0115814	Afu5g08940-T|Afu8g02700-T|Afu3g00690-T|Afu1g06130-T|Afu1g12080-T|Afu6g10260-T|Afu1g01590-T|Afu1g15420-T|Afu2g11740-T|Afu2g14130-T|Afu3g02090-T|Afu7g06490-T|Afu8g01990-T|Afu1g11620-T|Afu3g08680-T|Afu6g04750-T|Afu3g11430-T|Afu2g11180-T|Afu2g10900-T|Afu5g01750-T|Afu1g17490-T|Afu5g07040-T|Afu8g07070-T|Afu1g10540-T|Afu5g09130-T|Afu6g04040-T|Afu1g03860-T|Afu8g04100-T|Afu4g13530-T|Afu6g11820-T|Afu4g0984…	http://amigo.geneontology.org/cgi-bin/amigo/term_details?term=GO:0009056
organonitrogen compound catabolic process	Gene Ontology	GO:1901565	23	91	0.0131563	Afu5g08940-T|Afu3g00690-T|Afu6g11430-T|Afu3g11430-T|Afu5g07510-T|Afu1g13210-T|Afu1g10540-T|Afu1g15520-T|Afu2g09150-T|Afu2g11700-T|Afu1g05570-T|Afu2g02250-T|Afu4g09840-T|Afu4g11220-T|Afu6g08760-T|Afu5g09130-T|Afu8g06470-T|Afu2g08830-T|Afu3g08050-T|Afu3g12560-T|Afu4g08990-T|Afu1g02780-T|Afu5g07360-T	http://amigo.geneontology.org/cgi-bin/amigo/term_details?term=GO:1901565
regulation of cellular catabolic process	Gene Ontology	GO:0031329	9	23	0.0140119	Afu3g00690-T|Afu1g03860-T|Afu1g01590-T|Afu2g08830-T|Afu3g08050-T|Afu1g10540-T|Afu6g08000-T|Afu6g07980-T|Afu6g14210-T	http://amigo.geneontology.org/cgi-bin/amigo/term_details?term=GO:0031329
single-organism catabolic process	Gene Ontology	GO:0044712	41	192	0.0143328	Afu5g08940-T|Afu8g02700-T|Afu3g00690-T|Afu1g11630-T|Afu6g04040-T|Afu6g10260-T|Afu8g01990-T|Afu1g11620-T|Afu6g11430-T|Afu3g11430-T|Afu2g11180-T|Afu2g10900-T|Afu5g07510-T|Afu7g06490-T|Afu5g07040-T|Afu8g07070-T|Afu5g09130-T|Afu4g13530-T|Afu1g10540-T|Afu1g15520-T|Afu5g09860-T|Afu2g09150-T|Afu2g10230-T|Afu2g11700-T|Afu1g05570-T|Afu2g02250-T|Afu4g09840-T|Afu4g11220-T|Afu6g08760-T|Afu6g07980-T|Afu6g1421…	http://amigo.geneontology.org/cgi-bin/amigo/term_details?term=GO:0044712
regulation of cellular metabolic process	Gene Ontology	GO:0031323	104	575	0.0147991	Afu8g02700-T|Afu3g14040-T|Afu4g13130-T|Afu1g16310-T|Afu5g11580-T|Afu1g01590-T|Afu4g13230-T|Afu1g10540-T|Afu3g11630-T|Afu3g04120-T|Afu1g15760-T|Afu5g09240-T|Afu1g15910-T|Afu1g17460-T|Afu2g15790-T|Afu3g14840-T|Afu3g01880-T|Afu2g17880-T|Afu6g14150-T|Afu6g04050-T|Afu1g09950-T|Afu6g08790-T|Afu8g01990-T|Afu3g11430-T|Afu5g13080-T|Afu8g00750-T|Afu5g01650-T|Afu1g13310-T|Afu5g13920-T|Afu1g02590-T|Afu3g0292…	http://amigo.geneontology.org/cgi-bin/amigo/term_details?term=GO:0031323
organic substance catabolic process	Gene Ontology	GO:1901575	79	422	0.0164047	Afu5g08940-T|Afu8g02700-T|Afu3g00690-T|Afu1g06130-T|Afu1g12080-T|Afu6g10260-T|Afu1g01590-T|Afu2g11740-T|Afu2g14130-T|Afu3g02090-T|Afu7g06490-T|Afu8g01990-T|Afu1g11620-T|Afu3g08680-T|Afu6g04750-T|Afu3g11430-T|Afu2g11180-T|Afu2g10900-T|Afu5g01750-T|Afu1g17490-T|Afu5g07040-T|Afu8g07070-T|Afu5g09130-T|Afu6g04040-T|Afu8g04100-T|Afu4g13530-T|Afu6g11820-T|Afu4g09840-T|Afu1g13210-T|Afu5g07510-T|Afu7g0132…	http://amigo.geneontology.org/cgi-bin/amigo/term_details?term=GO:1901575
interstrand cross-link repair	Gene Ontology	GO:0036297	5	8	0.0164699	Afu2g15220-T|Afu7g05280-T|Afu1g03050-T|Afu2g10820-T|Afu6g07500-T	http://amigo.geneontology.org/cgi-bin/amigo/term_details?term=GO:0036297
nucleobase-containing compound metabolic process	Gene Ontology	GO:0006139	178	1053	0.0170703	Afu2g15220-T|Afu4g03840-T|Afu3g14040-T|Afu1g10480-T|Afu1g12570-T|Afu4g09620-T|Afu7g05530-T|Afu4g11140-T|Afu4g13130-T|Afu1g15120-T|Afu5g11580-T|Afu7g01270-T|Afu1g01590-T|Afu4g13230-T|Afu1g09350-T|Afu7g01890-T|Afu7g01280-T|Afu3g11630-T|Afu1g07620-T|Afu6g13130-T|Afu3g02380-T|Afu2g08540-T|Afu3g04120-T|Afu5g07530-T|Afu5g09240-T|Afu2g08840-T|Afu7g06550-T|Afu1g15910-T|Afu1g17460-T|Afu2g15790-T|Afu3g1484…	http://amigo.geneontology.org/cgi-bin/amigo/term_details?term=GO:0006139
telomere maintenance	Gene Ontology	GO:0000723	8	20	0.0182665	Afu5g04170-T|Afu1g10850-T|Afu5g13920-T|Afu2g03210-T|Afu3g04120-T|Afu6g07980-T|Afu3g11630-T|Afu6g14210-T	http://amigo.geneontology.org/cgi-bin/amigo/term_details?term=GO:0000723
anatomical structure homeostasis	Gene Ontology	GO:0060249	8	20	0.0182665	Afu5g04170-T|Afu1g10850-T|Afu5g13920-T|Afu2g03210-T|Afu3g04120-T|Afu6g07980-T|Afu3g11630-T|Afu6g14210-T	http://amigo.geneontology.org/cgi-bin/amigo/term_details?term=GO:0060249
inorganic anion transport	Gene Ontology	GO:0015698	8	20	0.0182665	Afu5g15010-T|Afu5g10630-T|Afu8g01850-T|Afu2g16210-T|Afu3g03010-T|Afu2g08900-T|Afu2g15090-T|Afu1g17470-T	http://amigo.geneontology.org/cgi-bin/amigo/term_details?term=GO:0015698
telomere organization	Gene Ontology	GO:0032200	8	20	0.0182665	Afu5g04170-T|Afu1g10850-T|Afu5g13920-T|Afu2g03210-T|Afu3g04120-T|Afu6g07980-T|Afu3g11630-T|Afu6g14210-T	http://amigo.geneontology.org/cgi-bin/amigo/term_details?term=GO:0032200
regulation of primary metabolic process	Gene Ontology	GO:0080090	100	557	0.0195424	Afu8g02700-T|Afu3g14040-T|Afu4g13130-T|Afu1g16310-T|Afu5g11580-T|Afu1g01590-T|Afu4g13230-T|Afu1g10540-T|Afu3g11630-T|Afu3g04120-T|Afu1g15760-T|Afu5g09240-T|Afu1g15910-T|Afu1g17460-T|Afu2g15790-T|Afu3g14840-T|Afu3g01880-T|Afu2g17880-T|Afu6g14150-T|Afu6g04050-T|Afu1g09950-T|Afu6g08790-T|Afu8g01990-T|Afu3g11430-T|Afu5g13080-T|Afu8g00750-T|Afu5g01650-T|Afu1g13310-T|Afu5g13920-T|Afu1g02590-T|Afu3g0292…	http://amigo.geneontology.org/cgi-bin/amigo/term_details?term=GO:0080090
transmembrane transport	Gene Ontology	GO:0055085	85	464	0.0202594	Afu6g02000-T|Afu4g11400-T|Afu5g10630-T|Afu6g00130-T|Afu2g15410-T|Afu6g04420-T|Afu8g04150-T|Afu3g03010-T|Afu2g16210-T|Afu6g03200-T|Afu4g03740-T|Afu5g11080-T|Afu3g13520-T|Afu2g00110-T|Afu7g01190-T|Afu3g01560-T|Afu1g01930-T|Afu5g14540-T|Afu2g15000-T|Afu4g10990-T|Afu4g08740-T|Afu2g00810-T|Afu5g06580-T|Afu6g00710-T|Afu2g12790-T|Afu5g00930-T|Afu2g05190-T|Afu3g08850-T|Afu6g03720-T|Afu1g13210-T|Afu8g0470…	http://amigo.geneontology.org/cgi-bin/amigo/term_details?term=GO:0055085
cellular response to heat	Gene Ontology	GO:0034605	12	39	0.0211027	Afu1g07440-T|Afu5g12960-T|Afu2g01450-T|Afu4g12850-T|Afu5g04170-T|Afu1g10850-T|Afu4g13530-T|Afu1g05040-T|Afu5g10270-T|Afu2g09290-T|Afu3g05650-T|Afu4g11330-T	http://amigo.geneontology.org/cgi-bin/amigo/term_details?term=GO:0034605
heterocycle biosynthetic process	Gene Ontology	GO:0018130	129	747	0.0237592	Afu8g02700-T|Afu3g14040-T|Afu5g11110-T|Afu4g13130-T|Afu5g11580-T|Afu7g01270-T|Afu1g01590-T|Afu4g13230-T|Afu1g09350-T|Afu7g01890-T|Afu1g10540-T|Afu3g11630-T|Afu6g13130-T|Afu2g08540-T|Afu3g04120-T|Afu5g07530-T|Afu5g09240-T|Afu2g08840-T|Afu7g06550-T|Afu1g15910-T|Afu1g17460-T|Afu2g15790-T|Afu3g14840-T|Afu3g01880-T|Afu2g17880-T|Afu6g14150-T|Afu1g02480-T|Afu1g09950-T|Afu6g08790-T|Afu8g01990-T|Afu6g0302…	http://amigo.geneontology.org/cgi-bin/amigo/term_details?term=GO:0018130
purine nucleobase catabolic process	Gene Ontology	GO:0006145	4	6	0.0274766	Afu2g02250-T|Afu4g11220-T|Afu4g08990-T|Afu2g09150-T	http://amigo.geneontology.org/cgi-bin/amigo/term_details?term=GO:0006145
nucleobase catabolic process	Gene Ontology	GO:0046113	4	6	0.0274766	Afu2g02250-T|Afu4g11220-T|Afu4g08990-T|Afu2g09150-T	http://amigo.geneontology.org/cgi-bin/amigo/term_details?term=GO:0046113
regulation of macromolecule metabolic process	Gene Ontology	GO:0060255	97	548	0.0283701	Afu8g02700-T|Afu3g14040-T|Afu4g13130-T|Afu1g16310-T|Afu5g11580-T|Afu1g01590-T|Afu4g13230-T|Afu1g10540-T|Afu3g11630-T|Afu7g04340-T|Afu1g15760-T|Afu5g09240-T|Afu1g15910-T|Afu1g17460-T|Afu2g15790-T|Afu3g14840-T|Afu3g01880-T|Afu2g17880-T|Afu6g14150-T|Afu6g04050-T|Afu1g09950-T|Afu6g08790-T|Afu8g01990-T|Afu5g13080-T|Afu8g00750-T|Afu5g01650-T|Afu1g13310-T|Afu5g13920-T|Afu1g02590-T|Afu3g02920-T|Afu1g1085…	http://amigo.geneontology.org/cgi-bin/amigo/term_details?term=GO:0060255
regulation of metabolic process	Gene Ontology	GO:0019222	104	595	0.0310184	Afu8g02700-T|Afu3g14040-T|Afu4g13130-T|Afu1g16310-T|Afu5g11580-T|Afu1g01590-T|Afu4g13230-T|Afu1g10540-T|Afu3g11630-T|Afu3g04120-T|Afu1g15760-T|Afu5g09240-T|Afu1g15910-T|Afu1g17460-T|Afu2g15790-T|Afu3g14840-T|Afu3g01880-T|Afu2g17880-T|Afu6g14150-T|Afu6g04050-T|Afu1g09950-T|Afu6g08790-T|Afu8g01990-T|Afu3g11430-T|Afu5g13080-T|Afu8g00750-T|Afu5g01650-T|Afu1g13310-T|Afu5g13920-T|Afu1g02590-T|Afu3g0292…	http://amigo.geneontology.org/cgi-bin/amigo/term_details?term=GO:0019222
mismatch repair	Gene Ontology	GO:0006298	5	10	0.0310729	Afu7g04480-T|Afu1g11170-T|Afu2g04860-T|Afu4g06490-T|Afu8g05820-T	http://amigo.geneontology.org/cgi-bin/amigo/term_details?term=GO:0006298
protein ubiquitination involved in ubiquitin-dependent protein catabolic process	Gene Ontology	GO:0042787	5	10	0.0310729	Afu5g07040-T|Afu6g13170-T|Afu1g05040-T|Afu6g14210-T|Afu6g10530-T	http://amigo.geneontology.org/cgi-bin/amigo/term_details?term=GO:0042787
regulation of catabolic process	Gene Ontology	GO:0009894	9	28	0.0351614	Afu3g00690-T|Afu1g03860-T|Afu1g01590-T|Afu2g08830-T|Afu3g08050-T|Afu1g10540-T|Afu6g08000-T|Afu6g07980-T|Afu6g14210-T	http://amigo.geneontology.org/cgi-bin/amigo/term_details?term=GO:0009894
RNA metabolic process	Gene Ontology	GO:0016070	130	768	0.0372982	Afu8g02700-T|Afu3g14040-T|Afu1g12570-T|Afu4g13130-T|Afu5g11580-T|Afu1g01590-T|Afu4g13230-T|Afu1g09350-T|Afu7g01890-T|Afu1g10540-T|Afu6g13130-T|Afu3g02380-T|Afu2g08540-T|Afu3g04120-T|Afu5g07530-T|Afu5g09240-T|Afu2g08840-T|Afu7g06550-T|Afu1g15910-T|Afu1g17460-T|Afu2g15790-T|Afu3g14840-T|Afu3g01880-T|Afu6g14150-T|Afu2g07710-T|Afu1g09950-T|Afu6g08790-T|Afu8g01990-T|Afu4g10520-T|Afu5g08280-T|Afu1g0638…	http://amigo.geneontology.org/cgi-bin/amigo/term_details?term=GO:0016070
response to heat	Gene Ontology	GO:0009408	13	49	0.0407195	Afu1g07440-T|Afu5g12960-T|Afu2g01450-T|Afu4g12850-T|Afu5g04170-T|Afu1g10850-T|Afu4g13530-T|Afu1g05040-T|Afu5g10270-T|Afu2g09290-T|Afu3g05650-T|Afu1g03040-T|Afu4g11330-T	http://amigo.geneontology.org/cgi-bin/amigo/term_details?term=GO:0009408
response to stress	Gene Ontology	GO:0006950	83	473	0.0467423	Afu2g15220-T|Afu4g03840-T|Afu5g08410-T|Afu1g10480-T|Afu3g12830-T|Afu4g09620-T|Afu1g09950-T|Afu5g10270-T|Afu5g09310-T|Afu5g11430-T|Afu4g11140-T|Afu4g12990-T|Afu5g09100-T|Afu7g05280-T|Afu6g04750-T|Afu5g08480-T|Afu3g11140-T|Afu4g06260-T|Afu1g15120-T|Afu3g01290-T|Afu5g09000-T|Afu2g10820-T|Afu5g07040-T|Afu5g12960-T|Afu2g01450-T|Afu7g04783-T|Afu5g11580-T|Afu7g01270-T|Afu3g08850-T|Afu3g13970-T|Afu3g0335…	http://amigo.geneontology.org/cgi-bin/amigo/term_details?term=GO:0006950
response to abiotic stimulus	Gene Ontology	GO:0009628	33	164	0.0480191	Afu3g07990-T|Afu2g10820-T|Afu5g10270-T|Afu4g12990-T|Afu5g09100-T|Afu4g06260-T|Afu5g12960-T|Afu2g01450-T|Afu4g13530-T|Afu1g02700-T|Afu3g05650-T|Afu5g08480-T|Afu1g15520-T|Afu4g11330-T|Afu1g09220-T|Afu5g04170-T|Afu1g10850-T|Afu2g17170-T|Afu1g03040-T|Afu1g15760-T|Afu1g16320-T|Afu5g09240-T|Afu6g14210-T|Afu8g04890-T|Afu1g07440-T|Afu6g09260-T|Afu5g13890-T|Afu4g12850-T|Afu1g05040-T|Afu2g09290-T|Afu2g0066…	http://amigo.geneontology.org/cgi-bin/amigo/term_details?term=GO:0009628
cellular amino acid catabolic process	Gene Ontology	GO:0009063	10	35	0.0480325	Afu5g08940-T|Afu3g00690-T|Afu1g05570-T|Afu8g06470-T|Afu3g08050-T|Afu1g02780-T|Afu6g11430-T|Afu6g08760-T|Afu3g11430-T|Afu5g07510-T	http://amigo.geneontology.org/cgi-bin/amigo/term_details?term=GO:0009063
postreplication repair	Gene Ontology	GO:0006301	6	16	0.048304	Afu6g14210-T|Afu6g08570-T|Afu7g01270-T|Afu1g02700-T|Afu2g08840-T|Afu5g09000-T	http://amigo.geneontology.org/cgi-bin/amigo/term_details?term=GO:0006301

## Sheet: GO down wt HS 60' vs wt 30ºC
#Term	Database	ID	Input number	Background number	P-Value	Input	Hyperlink
organonitrogen compound biosynthetic process	Gene Ontology	GO:1901566	158	482	1.24425e-14	Afu1g16850-T|Afu8g00420-T|Afu8g00100-T|Afu6g11620-T|Afu2g02120-T|Afu4g01450-T|Afu1g06340-T|Afu6g07670-T|Afu5g11210-T|Afu6g12050-T|Afu2g16370-T|Afu3g07640-T|Afu2g03590-T|Afu6g11260-T|Afu1g16210-T|Afu2g09650-T|Afu1g06940-T|Afu1g11130-T|Afu4g07845-T|Afu2g03610-T|Afu1g03110-T|Afu4g13170-T|Afu6g12060-T|Afu6g12580-T|Afu1g07530-T|Afu5g02470-T|Afu5g03490-T|Afu1g09330-T|Afu5g03140-T|Afu4g08330-T|Afu1g0432…	http://amigo.geneontology.org/cgi-bin/amigo/term_details?term=GO:1901566
organonitrogen compound metabolic process	Gene Ontology	GO:1901564	200	683	3.47683e-14	Afu1g16850-T|Afu8g00420-T|Afu3g12120-T|Afu8g00100-T|Afu6g11620-T|Afu2g02120-T|Afu3g11690-T|Afu6g08730-T|Afu1g06340-T|Afu6g07670-T|Afu5g11210-T|Afu6g12050-T|Afu2g16370-T|Afu3g07640-T|Afu2g03590-T|Afu6g11260-T|Afu1g16210-T|Afu2g09650-T|Afu1g06940-T|Afu5g04330-T|Afu4g07845-T|Afu2g03610-T|Afu1g03110-T|Afu4g09360-T|Afu4g13170-T|Afu3g09320-T|Afu6g12060-T|Afu6g12580-T|Afu1g07530-T|Afu6g07430-T|Afu5g0247…	http://amigo.geneontology.org/cgi-bin/amigo/term_details?term=GO:1901564
peptide metabolic process	Gene Ontology	GO:0006518	89	232	1.64388e-11	Afu8g00100-T|Afu1g06340-T|Afu6g12050-T|Afu2g16370-T|Afu2g03590-T|Afu6g11260-T|Afu1g16210-T|Afu1g11130-T|Afu4g07845-T|Afu1g03110-T|Afu4g13170-T|Afu1g02570-T|Afu3g08640-T|Afu4g08110-T|Afu1g09330-T|Afu7g04760-T|Afu1g11190-T|Afu1g12940-T|Afu4g07660-T|Afu1g06830-T|Afu7g01460-T|Afu1g05200-T|Afu1g15730-T|Afu2g13530-T|Afu2g09210-T|Afu1g17200-T|Afu2g10090-T|Afu1g04320-T|Afu8g00170-T|Afu1g04040-T|Afu6g1208…	http://amigo.geneontology.org/cgi-bin/amigo/term_details?term=GO:0006518
peptide biosynthetic process	Gene Ontology	GO:0043043	85	216	1.67078e-11	Afu1g05200-T|Afu1g15730-T|Afu4g07730-T|Afu1g06520-T|Afu8g00100-T|Afu6g12080-T|Afu7g02140-T|Afu1g04320-T|Afu3g13310-T|Afu6g13990-T|Afu1g05340-T|Afu1g06340-T|Afu5g05450-T|Afu5g03020-T|Afu1g09100-T|Afu4g07435-T|Afu6g12050-T|Afu2g16370-T|Afu2g10440-T|Afu1g12940-T|Afu2g03590-T|Afu2g10100-T|Afu1g17200-T|Afu2g10090-T|Afu4g12170-T|Afu3g06640-T|Afu1g05990-T|Afu1g11130-T|Afu4g07845-T|Afu8g03930-T|Afu2g1353…	http://amigo.geneontology.org/cgi-bin/amigo/term_details?term=GO:0043043
amide biosynthetic process	Gene Ontology	GO:0043604	88	235	5.91216e-11	Afu8g00420-T|Afu8g00100-T|Afu1g06340-T|Afu6g12050-T|Afu2g16370-T|Afu2g03590-T|Afu6g11260-T|Afu1g16210-T|Afu1g11130-T|Afu4g07845-T|Afu1g03110-T|Afu4g13170-T|Afu1g02570-T|Afu3g08640-T|Afu4g08110-T|Afu1g09330-T|Afu4g08330-T|Afu5g13840-T|Afu1g11190-T|Afu1g12940-T|Afu4g07660-T|Afu1g06830-T|Afu7g01460-T|Afu1g05200-T|Afu1g15730-T|Afu2g13530-T|Afu2g09210-T|Afu1g17200-T|Afu2g10090-T|Afu1g04320-T|Afu8g0017…	http://amigo.geneontology.org/cgi-bin/amigo/term_details?term=GO:0043604
translation	Gene Ontology	GO:0006412	72	172	6.83138e-11	Afu1g05200-T|Afu1g15730-T|Afu4g07730-T|Afu1g06520-T|Afu8g00100-T|Afu7g02140-T|Afu1g04320-T|Afu1g05340-T|Afu1g06340-T|Afu5g05450-T|Afu5g03020-T|Afu1g09100-T|Afu4g07435-T|Afu2g16370-T|Afu2g10440-T|Afu1g12940-T|Afu2g03590-T|Afu2g10100-T|Afu2g10090-T|Afu4g12170-T|Afu3g06640-T|Afu1g05990-T|Afu1g11130-T|Afu4g07845-T|Afu8g03930-T|Afu2g13530-T|Afu7g04490-T|Afu5g06360-T|Afu1g05500-T|Afu4g13170-T|Afu5g1154…	http://amigo.geneontology.org/cgi-bin/amigo/term_details?term=GO:0006412
cellular amide metabolic process	Gene Ontology	GO:0043603	95	271	1.8487e-10	Afu8g00420-T|Afu3g12120-T|Afu8g00100-T|Afu1g06340-T|Afu6g12050-T|Afu2g16370-T|Afu2g03590-T|Afu6g11260-T|Afu1g16210-T|Afu1g11130-T|Afu4g07845-T|Afu1g03110-T|Afu4g13170-T|Afu1g02570-T|Afu3g08640-T|Afu4g08110-T|Afu1g09330-T|Afu7g04760-T|Afu5g13840-T|Afu1g12940-T|Afu4g07660-T|Afu1g06830-T|Afu7g01460-T|Afu1g05200-T|Afu1g15730-T|Afu2g13530-T|Afu2g09210-T|Afu1g17200-T|Afu2g10090-T|Afu1g04320-T|Afu8g0017…	http://amigo.geneontology.org/cgi-bin/amigo/term_details?term=GO:0043603
single-organism metabolic process	Gene Ontology	GO:0044710	319	1396	3.95267e-10	Afu3g03980-T|Afu1g16850-T|Afu8g00420-T|Afu6g11620-T|Afu2g17600-T|Afu8g00100-T|Afu6g10120-T|Afu3g08010-T|Afu2g02120-T|Afu3g11690-T|Afu8g06080-T|Afu4g05915-T|Afu6g08730-T|Afu3g12910-T|Afu5g02490-T|Afu2g13025-T|Afu6g03770-T|Afu7g05350-T|Afu8g07120-T|Afu6g12050-T|Afu3g09960-T|Afu2g17580-T|Afu3g07640-T|Afu2g01890-T|Afu8g05580-T|Afu1g16210-T|Afu2g09650-T|Afu1g06940-T|Afu7g00130-T|Afu7g02070-T|Afu1g1414…	http://amigo.geneontology.org/cgi-bin/amigo/term_details?term=GO:0044710
small molecule biosynthetic process	Gene Ontology	GO:0044283	96	292	2.32726e-09	Afu1g16850-T|Afu8g00420-T|Afu3g12120-T|Afu2g17600-T|Afu3g11690-T|Afu2g17580-T|Afu2g01890-T|Afu2g09650-T|Afu1g06940-T|Afu8g00490-T|Afu4g12930-T|Afu4g11500-T|Afu6g12060-T|Afu6g12580-T|Afu7g05920-T|Afu8g00200-T|Afu5g02470-T|Afu4g01450-T|Afu5g13840-T|Afu3g06410-T|Afu2g14210-T|Afu6g03050-T|Afu4g00210-T|Afu6g07720-T|Afu3g08660-T|Afu2g03700-T|Afu1g07380-T|Afu4g09810-T|Afu2g10660-T|Afu5g04250-T|Afu8g0023…	http://amigo.geneontology.org/cgi-bin/amigo/term_details?term=GO:0044283
small molecule metabolic process	Gene Ontology	GO:0044281	174	667	4.34375e-09	Afu1g16850-T|Afu8g00420-T|Afu3g12120-T|Afu2g17600-T|Afu8g00100-T|Afu6g11620-T|Afu2g02120-T|Afu3g11690-T|Afu6g08730-T|Afu2g17580-T|Afu3g07640-T|Afu2g01890-T|Afu8g02440-T|Afu1g16210-T|Afu2g09650-T|Afu1g06940-T|Afu1g03420-T|Afu8g00490-T|Afu2g03610-T|Afu4g12930-T|Afu4g11500-T|Afu4g13170-T|Afu5g01030-T|Afu3g09320-T|Afu8g02000-T|Afu6g12060-T|Afu6g12580-T|Afu7g05920-T|Afu6g07430-T|Afu6g00660-T|Afu5g0349…	http://amigo.geneontology.org/cgi-bin/amigo/term_details?term=GO:0044281
single-organism biosynthetic process	Gene Ontology	GO:0044711	157	584	4.90219e-09	Afu1g16850-T|Afu8g00420-T|Afu3g12120-T|Afu2g17600-T|Afu6g11620-T|Afu2g02120-T|Afu3g11690-T|Afu8g06080-T|Afu3g12910-T|Afu6g12050-T|Afu2g17580-T|Afu3g07640-T|Afu2g01890-T|Afu2g09650-T|Afu1g06940-T|Afu7g00130-T|Afu1g14140-T|Afu8g00490-T|Afu2g03610-T|Afu4g12930-T|Afu4g11500-T|Afu6g12060-T|Afu6g12580-T|Afu7g05920-T|Afu6g07430-T|Afu6g00660-T|Afu5g03490-T|Afu4g01450-T|Afu4g03410-T|Afu6g04290-T|Afu1g1578…	http://amigo.geneontology.org/cgi-bin/amigo/term_details?term=GO:0044711
oxidation-reduction process	Gene Ontology	GO:0055114	157	589	7.99869e-09	Afu1g16850-T|Afu8g06080-T|Afu3g12120-T|Afu3g03560-T|Afu6g10120-T|Afu1g08810-T|Afu6g08730-T|Afu5g02490-T|Afu2g13025-T|Afu2g01890-T|Afu2g11300-T|Afu7g02070-T|Afu2g03610-T|Afu4g12930-T|Afu8g05140-T|Afu5g01030-T|Afu8g02000-T|Afu6g12060-T|Afu3g02840-T|Afu7g05920-T|Afu2g09580-T|Afu8g00920-T|Afu4g03410-T|Afu8g00190-T|Afu6g00510-T|Afu7g01980-T|Afu3g14880-T|Afu6g03770-T|Afu2g16630-T|Afu8g00220-T|Afu5g1042…	http://amigo.geneontology.org/cgi-bin/amigo/term_details?term=GO:0055114
secondary metabolic process	Gene Ontology	GO:0019748	64	204	4.06159e-06	Afu3g12120-T|Afu8g00420-T|Afu7g00130-T|Afu2g17600-T|Afu4g14380-T|Afu3g03410-T|Afu8g06080-T|Afu8g00250-T|Afu2g03700-T|Afu2g07680-T|Afu8g00380-T|Afu6g12180-T|Afu5g13840-T|Afu8g00620-T|Afu6g12050-T|Afu2g17540-T|Afu2g17580-T|Afu1g17200-T|Afu6g13790-T|Afu8g00470-T|Afu8g00390-T|Afu8g00400-T|Afu8g00230-T|Afu3g08010-T|Afu3g03400-T|Afu8g00490-T|Afu3g12900-T|Afu3g12930-T|Afu8g00200-T|Afu8g00170-T|Afu8g0050…	http://amigo.geneontology.org/cgi-bin/amigo/term_details?term=GO:0019748
purine nucleoside metabolic process	Gene Ontology	GO:0042278	28	62	1.55509e-05	Afu1g16280-T|Afu2g02120-T|Afu3g11690-T|Afu2g03700-T|Afu3g07810-T|Afu8g05320-T|Afu3g14440-T|Afu6g05320-T|Afu1g06960-T|Afu5g10550-T|Afu3g11070-T|Afu5g06390-T|Afu6g07430-T|Afu7g02310-T|Afu3g07640-T|Afu2g11940-T|Afu5g03490-T|Afu1g10130-T|Afu5g13840-T|Afu5g10560-T|Afu4g00960-T|Afu1g07530-T|Afu6g02230-T|Afu5g06240-T|Afu4g06790-T|Afu1g15450-T|Afu2g03010-T|Afu4g09360-T	http://amigo.geneontology.org/cgi-bin/amigo/term_details?term=GO:0042278
purine ribonucleoside metabolic process	Gene Ontology	GO:0046128	28	62	1.55509e-05	Afu1g16280-T|Afu2g02120-T|Afu3g11690-T|Afu2g03700-T|Afu3g07810-T|Afu8g05320-T|Afu3g14440-T|Afu6g05320-T|Afu1g06960-T|Afu5g10550-T|Afu3g11070-T|Afu5g06390-T|Afu6g07430-T|Afu7g02310-T|Afu3g07640-T|Afu2g11940-T|Afu5g03490-T|Afu1g10130-T|Afu5g13840-T|Afu5g10560-T|Afu4g00960-T|Afu1g07530-T|Afu6g02230-T|Afu5g06240-T|Afu4g06790-T|Afu1g15450-T|Afu2g03010-T|Afu4g09360-T	http://amigo.geneontology.org/cgi-bin/amigo/term_details?term=GO:0046128
organic hydroxy compound biosynthetic process	Gene Ontology	GO:1901617	39	106	1.83174e-05	Afu2g17600-T|Afu3g03410-T|Afu2g03700-T|Afu2g07680-T|Afu2g17540-T|Afu2g17580-T|Afu2g10660-T|Afu2g11550-T|Afu3g11070-T|Afu8g00230-T|Afu4g07130-T|Afu3g03400-T|Afu8g00200-T|Afu4g11500-T|Afu4g03630-T|Afu1g04540-T|Afu7g03740-T|Afu6g12060-T|Afu8g00370-T|Afu8g00620-T|Afu2g18030-T|Afu2g01290-T|Afu5g07780-T|Afu6g12070-T|Afu7g00160-T|Afu4g00230-T|Afu3g12930-T|Afu6g13990-T|Afu8g00910-T|Afu1g17190-T|Afu4g0021…	http://amigo.geneontology.org/cgi-bin/amigo/term_details?term=GO:1901617
organic substance biosynthetic process	Gene Ontology	GO:1901576	271	1314	2.12891e-05	Afu1g16850-T|Afu8g00420-T|Afu6g11620-T|Afu2g17600-T|Afu8g00100-T|Afu5g05510-T|Afu3g08010-T|Afu2g02120-T|Afu3g11690-T|Afu8g06080-T|Afu3g12120-T|Afu1g06340-T|Afu6g07670-T|Afu5g11210-T|Afu6g12050-T|Afu2g16370-T|Afu4g09360-T|Afu2g17580-T|Afu3g07640-T|Afu2g03590-T|Afu2g01890-T|Afu3g13320-T|Afu6g11260-T|Afu1g16210-T|Afu2g09650-T|Afu1g06940-T|Afu1g11130-T|Afu4g07845-T|Afu1g14140-T|Afu8g00490-T|Afu2g0361…	http://amigo.geneontology.org/cgi-bin/amigo/term_details?term=GO:1901576
secondary metabolite biosynthetic process	Gene Ontology	GO:0044550	52	164	2.51913e-05	Afu8g06080-T|Afu7g00130-T|Afu2g17600-T|Afu3g03410-T|Afu2g03700-T|Afu2g07680-T|Afu3g12120-T|Afu6g12180-T|Afu5g13840-T|Afu6g12050-T|Afu2g17540-T|Afu2g17580-T|Afu1g17200-T|Afu6g13790-T|Afu8g00230-T|Afu3g08010-T|Afu3g03400-T|Afu3g12900-T|Afu8g00200-T|Afu8g00170-T|Afu6g09740-T|Afu6g12060-T|Afu6g12080-T|Afu8g00370-T|Afu8g00620-T|Afu3g12910-T|Afu6g00660-T|Afu2g18030-T|Afu2g17960-T|Afu4g03410-T|Afu2g0129…	http://amigo.geneontology.org/cgi-bin/amigo/term_details?term=GO:0044550
ribonucleoside metabolic process	Gene Ontology	GO:0009119	30	72	2.65835e-05	Afu1g16280-T|Afu2g02120-T|Afu3g11690-T|Afu2g03700-T|Afu3g07810-T|Afu8g05320-T|Afu3g14440-T|Afu6g05320-T|Afu1g06960-T|Afu5g10550-T|Afu3g11070-T|Afu8g02770-T|Afu5g06390-T|Afu6g07430-T|Afu7g02310-T|Afu3g07640-T|Afu2g11940-T|Afu5g03490-T|Afu1g15450-T|Afu5g13840-T|Afu5g10560-T|Afu4g00960-T|Afu1g07530-T|Afu6g02230-T|Afu5g06240-T|Afu4g06790-T|Afu2g08360-T|Afu1g10130-T|Afu2g03010-T|Afu4g09360-T	http://amigo.geneontology.org/cgi-bin/amigo/term_details?term=GO:0009119
ether biosynthetic process	Gene Ontology	GO:1901503	14	18	3.26764e-05	Afu8g00440-T|Afu8g00420-T|Afu8g00480-T|Afu8g00390-T|Afu8g00400-T|Afu8g00230-T|Afu8g00430-T|Afu8g00490-T|Afu8g00470-T|Afu8g00380-T|Afu8g00200-T|Afu8g00500-T|Afu8g00370-T|Afu8g00510-T	http://amigo.geneontology.org/cgi-bin/amigo/term_details?term=GO:1901503
biosynthetic process	Gene Ontology	GO:0009058	281	1382	3.64332e-05	Afu1g16850-T|Afu8g00420-T|Afu6g11620-T|Afu2g17600-T|Afu8g00100-T|Afu5g05510-T|Afu3g08010-T|Afu2g02120-T|Afu3g11690-T|Afu8g06080-T|Afu3g12910-T|Afu1g06340-T|Afu6g07670-T|Afu5g11210-T|Afu6g12050-T|Afu2g16370-T|Afu4g09360-T|Afu2g17580-T|Afu3g07640-T|Afu2g03590-T|Afu2g01890-T|Afu3g13320-T|Afu6g11260-T|Afu1g16210-T|Afu2g09650-T|Afu1g06940-T|Afu1g11130-T|Afu4g07845-T|Afu1g14140-T|Afu8g00490-T|Afu2g0361…	http://amigo.geneontology.org/cgi-bin/amigo/term_details?term=GO:0009058
fumagillin biosynthetic process	Gene Ontology	GO:1902086	12	13	3.88887e-05	Afu8g00440-T|Afu8g00420-T|Afu8g00480-T|Afu8g00390-T|Afu8g00400-T|Afu8g00430-T|Afu8g00490-T|Afu8g00470-T|Afu8g00380-T|Afu8g00500-T|Afu8g00370-T|Afu8g00510-T	http://amigo.geneontology.org/cgi-bin/amigo/term_details?term=GO:1902086
epoxide metabolic process	Gene Ontology	GO:0097176	12	13	3.88887e-05	Afu8g00440-T|Afu8g00420-T|Afu8g00480-T|Afu8g00390-T|Afu8g00400-T|Afu8g00430-T|Afu8g00490-T|Afu8g00470-T|Afu8g00380-T|Afu8g00500-T|Afu8g00370-T|Afu8g00510-T	http://amigo.geneontology.org/cgi-bin/amigo/term_details?term=GO:0097176
fumagillin metabolic process	Gene Ontology	GO:1902084	12	13	3.88887e-05	Afu8g00440-T|Afu8g00420-T|Afu8g00480-T|Afu8g00390-T|Afu8g00400-T|Afu8g00430-T|Afu8g00490-T|Afu8g00470-T|Afu8g00380-T|Afu8g00500-T|Afu8g00370-T|Afu8g00510-T	http://amigo.geneontology.org/cgi-bin/amigo/term_details?term=GO:1902084
cellular biosynthetic process	Gene Ontology	GO:0044249	266	1301	4.42121e-05	Afu1g16850-T|Afu8g00420-T|Afu6g11620-T|Afu2g17600-T|Afu8g00100-T|Afu5g05510-T|Afu3g08010-T|Afu2g02120-T|Afu4g01450-T|Afu8g06080-T|Afu3g12120-T|Afu1g06340-T|Afu6g07670-T|Afu5g11210-T|Afu6g12050-T|Afu2g16370-T|Afu2g17580-T|Afu3g07640-T|Afu2g03590-T|Afu2g01890-T|Afu3g13320-T|Afu6g11260-T|Afu1g16210-T|Afu2g09650-T|Afu1g06940-T|Afu1g11130-T|Afu4g07845-T|Afu1g14140-T|Afu8g00490-T|Afu2g03610-T|Afu4g1293…	http://amigo.geneontology.org/cgi-bin/amigo/term_details?term=GO:0044249
cofactor metabolic process	Gene Ontology	GO:0051186	47	148	5.88715e-05	Afu1g13500-T|Afu3g06120-T|Afu8g04650-T|Afu8g05580-T|Afu3g11690-T|Afu6g08850-T|Afu2g03700-T|Afu2g07680-T|Afu5g11210-T|Afu1g07480-T|Afu6g05320-T|Afu2g01890-T|Afu1g17200-T|Afu1g06960-T|Afu6g00660-T|Afu6g08440-T|Afu3g11070-T|Afu4g07130-T|Afu3g03400-T|Afu4g12930-T|Afu3g13120-T|Afu6g07430-T|Afu6g04380-T|Afu1g03195-T|Afu4g09810-T|Afu8g05330-T|Afu6g10610-T|Afu7g05720-T|Afu5g03140-T|Afu5g13840-T|Afu3g0641…	http://amigo.geneontology.org/cgi-bin/amigo/term_details?term=GO:0051186
organic acid biosynthetic process	Gene Ontology	GO:0016053	55	186	7.27231e-05	Afu1g16850-T|Afu8g00420-T|Afu3g12120-T|Afu6g07770-T|Afu8g02440-T|Afu2g11300-T|Afu3g08660-T|Afu4g01450-T|Afu3g14490-T|Afu1g07380-T|Afu6g04820-T|Afu2g15650-T|Afu5g04250-T|Afu2g17580-T|Afu7g05350-T|Afu1g15820-T|Afu2g09650-T|Afu8g00400-T|Afu3g14970-T|Afu8g00380-T|Afu8g00490-T|Afu8g00470-T|Afu2g07620-T|Afu2g10450-T|Afu7g04070-T|Afu1g15780-T|Afu8g00500-T|Afu2g14210-T|Afu2g12470-T|Afu6g12060-T|Afu6g1258…	http://amigo.geneontology.org/cgi-bin/amigo/term_details?term=GO:0016053
purine-containing compound metabolic process	Gene Ontology	GO:0072521	33	91	9.83693e-05	Afu1g16280-T|Afu2g02120-T|Afu3g11690-T|Afu2g03700-T|Afu3g07810-T|Afu8g05320-T|Afu3g14440-T|Afu2g11940-T|Afu6g05320-T|Afu2g10855-T|Afu1g06960-T|Afu5g10550-T|Afu3g11070-T|Afu6g11620-T|Afu5g06390-T|Afu2g03610-T|Afu6g07430-T|Afu7g02310-T|Afu4g07360-T|Afu3g07640-T|Afu8g05330-T|Afu5g03490-T|Afu1g10130-T|Afu5g13840-T|Afu5g10560-T|Afu4g00960-T|Afu1g07530-T|Afu6g02230-T|Afu5g06240-T|Afu4g06790-T|Afu1g1545…	http://amigo.geneontology.org/cgi-bin/amigo/term_details?term=GO:0072521
organic hydroxy compound metabolic process	Gene Ontology	GO:1901615	45	143	9.98494e-05	Afu1g16850-T|Afu2g17600-T|Afu3g03410-T|Afu2g03700-T|Afu2g07680-T|Afu8g02590-T|Afu2g17540-T|Afu2g17580-T|Afu2g10660-T|Afu2g11550-T|Afu3g11070-T|Afu8g00230-T|Afu4g07130-T|Afu3g03400-T|Afu8g00200-T|Afu4g11500-T|Afu4g03630-T|Afu1g04540-T|Afu7g03740-T|Afu8g02000-T|Afu6g12060-T|Afu8g00370-T|Afu8g00620-T|Afu2g18030-T|Afu8g00910-T|Afu2g01290-T|Afu5g07780-T|Afu6g12070-T|Afu7g00160-T|Afu4g00230-T|Afu3g1293…	http://amigo.geneontology.org/cgi-bin/amigo/term_details?term=GO:1901615
nucleoside metabolic process	Gene Ontology	GO:0009116	32	87	0.000100712	Afu3g00830-T|Afu1g16280-T|Afu5g14582-T|Afu3g11690-T|Afu2g03700-T|Afu3g07810-T|Afu8g05320-T|Afu3g14440-T|Afu6g05320-T|Afu1g06960-T|Afu5g10550-T|Afu3g11070-T|Afu8g02770-T|Afu5g06390-T|Afu6g07430-T|Afu7g02310-T|Afu3g07640-T|Afu2g02120-T|Afu2g11940-T|Afu5g03490-T|Afu1g15450-T|Afu5g13840-T|Afu5g10560-T|Afu4g00960-T|Afu1g07530-T|Afu6g02230-T|Afu5g06240-T|Afu4g06790-T|Afu2g08360-T|Afu1g10130-T|Afu2g0301…	http://amigo.geneontology.org/cgi-bin/amigo/term_details?term=GO:0009116
alkaloid metabolic process	Gene Ontology	GO:0009820	15	24	0.000104446	Afu3g14110-T|Afu6g12080-T|Afu8g00620-T|Afu2g18050-T|Afu2g18030-T|Afu8g00230-T|Afu2g17960-T|Afu8g00250-T|Afu6g13990-T|Afu6g12070-T|Afu3g12930-T|Afu8g00200-T|Afu8g00170-T|Afu6g12050-T|Afu6g12060-T	http://amigo.geneontology.org/cgi-bin/amigo/term_details?term=GO:0009820
ribonucleoside monophosphate metabolic process	Gene Ontology	GO:0009161	25	60	0.000121657	Afu1g16280-T|Afu3g11690-T|Afu3g07810-T|Afu8g05320-T|Afu3g14440-T|Afu3g07640-T|Afu2g10855-T|Afu1g06960-T|Afu5g10550-T|Afu3g11070-T|Afu6g11620-T|Afu6g07430-T|Afu7g02310-T|Afu2g11940-T|Afu1g15450-T|Afu5g13840-T|Afu5g10560-T|Afu4g00960-T|Afu1g07530-T|Afu6g02230-T|Afu5g06240-T|Afu4g06790-T|Afu2g08360-T|Afu2g03010-T|Afu4g09360-T	http://amigo.geneontology.org/cgi-bin/amigo/term_details?term=GO:0009161
purine nucleoside monophosphate metabolic process	Gene Ontology	GO:0009126	24	57	0.000145534	Afu1g16280-T|Afu3g11690-T|Afu3g07810-T|Afu8g05320-T|Afu3g14440-T|Afu3g07640-T|Afu2g10855-T|Afu1g06960-T|Afu5g10550-T|Afu3g11070-T|Afu6g11620-T|Afu6g07430-T|Afu7g02310-T|Afu2g11940-T|Afu1g15450-T|Afu5g13840-T|Afu5g10560-T|Afu4g00960-T|Afu1g07530-T|Afu6g02230-T|Afu5g06240-T|Afu4g06790-T|Afu2g03010-T|Afu4g09360-T	http://amigo.geneontology.org/cgi-bin/amigo/term_details?term=GO:0009126
purine ribonucleoside monophosphate metabolic process	Gene Ontology	GO:0009167	24	57	0.000145534	Afu1g16280-T|Afu3g11690-T|Afu3g07810-T|Afu8g05320-T|Afu3g14440-T|Afu3g07640-T|Afu2g10855-T|Afu1g06960-T|Afu5g10550-T|Afu3g11070-T|Afu6g11620-T|Afu6g07430-T|Afu7g02310-T|Afu2g11940-T|Afu1g15450-T|Afu5g13840-T|Afu5g10560-T|Afu4g00960-T|Afu1g07530-T|Afu6g02230-T|Afu5g06240-T|Afu4g06790-T|Afu2g03010-T|Afu4g09360-T	http://amigo.geneontology.org/cgi-bin/amigo/term_details?term=GO:0009167
indole alkaloid metabolic process	Gene Ontology	GO:0035834	12	16	0.000152856	Afu6g12080-T|Afu2g18050-T|Afu2g18030-T|Afu8g00230-T|Afu2g17960-T|Afu8g00250-T|Afu6g13990-T|Afu6g12070-T|Afu8g00200-T|Afu8g00170-T|Afu6g12050-T|Afu6g12060-T	http://amigo.geneontology.org/cgi-bin/amigo/term_details?term=GO:0035834
indole alkaloid biosynthetic process	Gene Ontology	GO:0035835	12	16	0.000152856	Afu6g12080-T|Afu2g18050-T|Afu2g18030-T|Afu8g00230-T|Afu2g17960-T|Afu8g00250-T|Afu6g13990-T|Afu6g12070-T|Afu8g00200-T|Afu8g00170-T|Afu6g12050-T|Afu6g12060-T	http://amigo.geneontology.org/cgi-bin/amigo/term_details?term=GO:0035835
glycosyl compound metabolic process	Gene Ontology	GO:1901657	32	90	0.000167213	Afu3g00830-T|Afu1g16280-T|Afu5g14582-T|Afu3g11690-T|Afu2g03700-T|Afu3g07810-T|Afu8g05320-T|Afu3g14440-T|Afu6g05320-T|Afu1g06960-T|Afu5g10550-T|Afu3g11070-T|Afu8g02770-T|Afu5g06390-T|Afu6g07430-T|Afu7g02310-T|Afu3g07640-T|Afu2g02120-T|Afu2g11940-T|Afu5g03490-T|Afu1g15450-T|Afu5g13840-T|Afu5g10560-T|Afu4g00960-T|Afu1g07530-T|Afu6g02230-T|Afu5g06240-T|Afu4g06790-T|Afu2g08360-T|Afu1g10130-T|Afu2g0301…	http://amigo.geneontology.org/cgi-bin/amigo/term_details?term=GO:1901657
organic acid metabolic process	Gene Ontology	GO:0006082	95	392	0.000175846	Afu1g16850-T|Afu8g00420-T|Afu3g12120-T|Afu8g00100-T|Afu3g11690-T|Afu2g17580-T|Afu8g02440-T|Afu1g16210-T|Afu2g09650-T|Afu1g06940-T|Afu8g00490-T|Afu4g13170-T|Afu3g09320-T|Afu6g12060-T|Afu6g12580-T|Afu7g05920-T|Afu7g02420-T|Afu4g01450-T|Afu4g08330-T|Afu5g13840-T|Afu6g03050-T|Afu4g00210-T|Afu5g10420-T|Afu3g08660-T|Afu1g07380-T|Afu8g00480-T|Afu5g04250-T|Afu3g11120-T|Afu5g09450-T|Afu2g09110-T|Afu6g1066…	http://amigo.geneontology.org/cgi-bin/amigo/term_details?term=GO:0006082
nucleoside monophosphate metabolic process	Gene Ontology	GO:0009123	25	62	0.000182947	Afu1g16280-T|Afu3g11690-T|Afu3g07810-T|Afu8g05320-T|Afu3g14440-T|Afu3g07640-T|Afu2g10855-T|Afu1g06960-T|Afu5g10550-T|Afu3g11070-T|Afu6g11620-T|Afu6g07430-T|Afu7g02310-T|Afu2g11940-T|Afu1g15450-T|Afu5g13840-T|Afu5g10560-T|Afu4g00960-T|Afu1g07530-T|Afu6g02230-T|Afu5g06240-T|Afu4g06790-T|Afu2g08360-T|Afu2g03010-T|Afu4g09360-T	http://amigo.geneontology.org/cgi-bin/amigo/term_details?term=GO:0009123
coenzyme metabolic process	Gene Ontology	GO:0006732	38	117	0.000200289	Afu1g13500-T|Afu3g06120-T|Afu8g04650-T|Afu8g05580-T|Afu3g11690-T|Afu6g08850-T|Afu2g03700-T|Afu5g11210-T|Afu6g05320-T|Afu2g01890-T|Afu1g06960-T|Afu6g00660-T|Afu3g11070-T|Afu4g07130-T|Afu4g12930-T|Afu6g07430-T|Afu6g04380-T|Afu1g03195-T|Afu4g09810-T|Afu8g05330-T|Afu6g10610-T|Afu7g05720-T|Afu5g03140-T|Afu5g13840-T|Afu3g06410-T|Afu2g11780-T|Afu7g00160-T|Afu4g00230-T|Afu6g08730-T|Afu4g00210-T|Afu4g0096…	http://amigo.geneontology.org/cgi-bin/amigo/term_details?term=GO:0006732
ether metabolic process	Gene Ontology	GO:0018904	15	26	0.000201516	Afu8g00440-T|Afu8g00420-T|Afu8g00480-T|Afu8g00390-T|Afu8g00400-T|Afu3g14970-T|Afu8g00230-T|Afu8g00430-T|Afu8g00490-T|Afu8g00470-T|Afu8g00380-T|Afu8g00200-T|Afu8g00500-T|Afu8g00370-T|Afu8g00510-T	http://amigo.geneontology.org/cgi-bin/amigo/term_details?term=GO:0018904
ketone biosynthetic process	Gene Ontology	GO:0042181	24	59	0.000220129	Afu3g06120-T|Afu2g17600-T|Afu6g08850-T|Afu8g00620-T|Afu2g17580-T|Afu2g01890-T|Afu4g12930-T|Afu1g03195-T|Afu8g00370-T|Afu4g09810-T|Afu6g00660-T|Afu6g04380-T|Afu2g01290-T|Afu6g12070-T|Afu3g06410-T|Afu7g00160-T|Afu4g00230-T|Afu3g12930-T|Afu8g00910-T|Afu4g00210-T|Afu8g00250-T|Afu4g00220-T|Afu6g12060-T|Afu5g10310-T	http://amigo.geneontology.org/cgi-bin/amigo/term_details?term=GO:0042181
alkaloid biosynthetic process	Gene Ontology	GO:0009821	13	20	0.000226919	Afu3g12930-T|Afu6g12080-T|Afu2g18050-T|Afu2g18030-T|Afu8g00230-T|Afu2g17960-T|Afu8g00250-T|Afu6g13990-T|Afu6g12070-T|Afu8g00200-T|Afu8g00170-T|Afu6g12050-T|Afu6g12060-T	http://amigo.geneontology.org/cgi-bin/amigo/term_details?term=GO:0009821
generation of precursor metabolites and energy	Gene Ontology	GO:0006091	26	68	0.000269187	Afu3g11690-T|Afu6g08850-T|Afu3g07810-T|Afu4g06790-T|Afu3g14440-T|Afu2g03730-T|Afu1g06960-T|Afu6g12930-T|Afu3g11070-T|Afu1g05390-T|Afu3g06190-T|Afu1g02140-T|Afu6g10660-T|Afu6g07430-T|Afu5g14530-T|Afu2g05060-T|Afu5g13840-T|Afu5g10560-T|Afu4g00960-T|Afu6g02230-T|Afu5g06240-T|Afu5g04230-T|Afu6g07670-T|Afu2g03010-T|Afu5g03610-T|Afu5g02480-T	http://amigo.geneontology.org/cgi-bin/amigo/term_details?term=GO:0006091
pyruvate metabolic process	Gene Ontology	GO:0006090	13	21	0.000321704	Afu1g06960-T|Afu4g00960-T|Afu3g11070-T|Afu7g05720-T|Afu7g02420-T|Afu3g11690-T|Afu4g07710-T|Afu6g02230-T|Afu5g06240-T|Afu6g07430-T|Afu5g13840-T|Afu5g14790-T|Afu3g04170-T	http://amigo.geneontology.org/cgi-bin/amigo/term_details?term=GO:0006090
purine nucleotide metabolic process	Gene Ontology	GO:0006163	27	74	0.000378141	Afu1g16280-T|Afu3g11690-T|Afu2g03700-T|Afu3g07810-T|Afu8g05320-T|Afu3g14440-T|Afu3g07640-T|Afu2g10855-T|Afu1g06960-T|Afu5g10550-T|Afu3g11070-T|Afu6g11620-T|Afu2g03610-T|Afu6g07430-T|Afu7g02310-T|Afu2g11940-T|Afu5g03490-T|Afu1g15450-T|Afu5g13840-T|Afu5g10560-T|Afu4g00960-T|Afu1g07530-T|Afu6g02230-T|Afu5g06240-T|Afu4g06790-T|Afu2g03010-T|Afu4g09360-T	http://amigo.geneontology.org/cgi-bin/amigo/term_details?term=GO:0006163
ATP metabolic process	Gene Ontology	GO:0046034	18	39	0.000406655	Afu3g07640-T|Afu4g09360-T|Afu1g16280-T|Afu1g06960-T|Afu4g06790-T|Afu5g10550-T|Afu4g00960-T|Afu3g11070-T|Afu3g11690-T|Afu6g02230-T|Afu5g06240-T|Afu6g07430-T|Afu5g13840-T|Afu3g07810-T|Afu8g05320-T|Afu5g10560-T|Afu2g03010-T|Afu3g14440-T	http://amigo.geneontology.org/cgi-bin/amigo/term_details?term=GO:0046034
purine ribonucleoside triphosphate metabolic process	Gene Ontology	GO:0009205	19	43	0.00043493	Afu3g07640-T|Afu4g09360-T|Afu1g16280-T|Afu1g06960-T|Afu4g06790-T|Afu5g10550-T|Afu5g03490-T|Afu3g11070-T|Afu4g00960-T|Afu3g11690-T|Afu6g02230-T|Afu5g06240-T|Afu6g07430-T|Afu5g13840-T|Afu3g07810-T|Afu8g05320-T|Afu5g10560-T|Afu2g03010-T|Afu3g14440-T	http://amigo.geneontology.org/cgi-bin/amigo/term_details?term=GO:0009205
ribose phosphate metabolic process	Gene Ontology	GO:0019693	31	93	0.000521759	Afu1g13500-T|Afu1g16280-T|Afu3g11690-T|Afu2g03700-T|Afu3g07810-T|Afu8g05320-T|Afu3g14440-T|Afu3g07640-T|Afu2g10855-T|Afu2g11780-T|Afu1g06960-T|Afu5g10550-T|Afu3g11070-T|Afu6g11620-T|Afu6g07430-T|Afu7g02310-T|Afu2g11940-T|Afu6g10610-T|Afu5g03490-T|Afu1g15450-T|Afu5g13840-T|Afu5g10560-T|Afu6g08730-T|Afu4g00960-T|Afu1g07530-T|Afu6g02230-T|Afu5g06240-T|Afu4g06790-T|Afu2g08360-T|Afu2g03010-T|Afu4g0936…	http://amigo.geneontology.org/cgi-bin/amigo/term_details?term=GO:0019693
purine nucleoside triphosphate metabolic process	Gene Ontology	GO:0009144	19	44	0.000543945	Afu3g07640-T|Afu4g09360-T|Afu1g16280-T|Afu1g06960-T|Afu4g06790-T|Afu5g10550-T|Afu5g03490-T|Afu3g11070-T|Afu4g00960-T|Afu3g11690-T|Afu6g02230-T|Afu5g06240-T|Afu6g07430-T|Afu5g13840-T|Afu3g07810-T|Afu8g05320-T|Afu5g10560-T|Afu2g03010-T|Afu3g14440-T	http://amigo.geneontology.org/cgi-bin/amigo/term_details?term=GO:0009144
ribonucleoside triphosphate metabolic process	Gene Ontology	GO:0009199	19	44	0.000543945	Afu3g07640-T|Afu4g09360-T|Afu1g16280-T|Afu1g06960-T|Afu4g06790-T|Afu5g10550-T|Afu5g03490-T|Afu3g11070-T|Afu4g00960-T|Afu3g11690-T|Afu6g02230-T|Afu5g06240-T|Afu6g07430-T|Afu5g13840-T|Afu3g07810-T|Afu8g05320-T|Afu5g10560-T|Afu2g03010-T|Afu3g14440-T	http://amigo.geneontology.org/cgi-bin/amigo/term_details?term=GO:0009199
alcohol biosynthetic process	Gene Ontology	GO:0046165	24	64	0.000571075	Afu3g03410-T|Afu2g03700-T|Afu2g07680-T|Afu2g10660-T|Afu2g11550-T|Afu3g11070-T|Afu8g00230-T|Afu3g03400-T|Afu8g00200-T|Afu4g11500-T|Afu4g03630-T|Afu1g04540-T|Afu7g03740-T|Afu8g00370-T|Afu2g18030-T|Afu2g01290-T|Afu5g07780-T|Afu6g12070-T|Afu6g13990-T|Afu8g00910-T|Afu1g17190-T|Afu2g18050-T|Afu5g06240-T|Afu3g03420-T	http://amigo.geneontology.org/cgi-bin/amigo/term_details?term=GO:0046165
oxidoreduction coenzyme metabolic process	Gene Ontology	GO:0006733	21	52	0.000574981	Afu6g05320-T|Afu1g13500-T|Afu3g06120-T|Afu4g09810-T|Afu8g04650-T|Afu6g10610-T|Afu4g00960-T|Afu3g11070-T|Afu6g04380-T|Afu6g02230-T|Afu3g11690-T|Afu2g01890-T|Afu6g08850-T|Afu6g08730-T|Afu4g12930-T|Afu5g06240-T|Afu6g07430-T|Afu5g13840-T|Afu1g06960-T|Afu3g06410-T|Afu2g11780-T	http://amigo.geneontology.org/cgi-bin/amigo/term_details?term=GO:0006733
purine ribonucleotide metabolic process	Gene Ontology	GO:0009150	26	73	0.00064612	Afu1g16280-T|Afu3g11690-T|Afu2g03700-T|Afu3g07810-T|Afu8g05320-T|Afu3g14440-T|Afu3g07640-T|Afu2g10855-T|Afu1g06960-T|Afu5g10550-T|Afu3g11070-T|Afu6g11620-T|Afu6g07430-T|Afu7g02310-T|Afu2g11940-T|Afu5g03490-T|Afu1g15450-T|Afu5g13840-T|Afu5g10560-T|Afu4g00960-T|Afu1g07530-T|Afu6g02230-T|Afu5g06240-T|Afu4g06790-T|Afu2g03010-T|Afu4g09360-T	http://amigo.geneontology.org/cgi-bin/amigo/term_details?term=GO:0009150
nucleoside triphosphate metabolic process	Gene Ontology	GO:0009141	20	50	0.000847332	Afu3g07640-T|Afu4g09360-T|Afu1g16280-T|Afu1g06960-T|Afu4g06790-T|Afu5g10550-T|Afu5g03490-T|Afu3g11070-T|Afu4g00960-T|Afu3g11690-T|Afu3g14440-T|Afu6g02230-T|Afu5g06240-T|Afu6g07430-T|Afu5g13840-T|Afu3g07810-T|Afu8g05320-T|Afu5g10560-T|Afu2g03010-T|Afu5g03460-T	http://amigo.geneontology.org/cgi-bin/amigo/term_details?term=GO:0009141
ribonucleotide metabolic process	Gene Ontology	GO:0009259	27	79	0.000856779	Afu1g16280-T|Afu3g11690-T|Afu2g03700-T|Afu3g07810-T|Afu8g05320-T|Afu3g14440-T|Afu3g07640-T|Afu2g10855-T|Afu1g06960-T|Afu5g10550-T|Afu3g11070-T|Afu6g11620-T|Afu6g07430-T|Afu7g02310-T|Afu2g11940-T|Afu5g03490-T|Afu1g15450-T|Afu5g13840-T|Afu5g10560-T|Afu4g00960-T|Afu1g07530-T|Afu6g02230-T|Afu5g06240-T|Afu4g06790-T|Afu2g08360-T|Afu2g03010-T|Afu4g09360-T	http://amigo.geneontology.org/cgi-bin/amigo/term_details?term=GO:0009259
rRNA export from nucleus	Gene Ontology	GO:0006407	8	9	0.000940559	Afu2g10090-T|Afu1g06770-T|Afu7g04490-T|Afu1g05340-T|Afu3g13320-T|Afu1g05630-T|Afu7g01460-T|Afu6g12660-T	http://amigo.geneontology.org/cgi-bin/amigo/term_details?term=GO:0006407
rRNA transport	Gene Ontology	GO:0051029	8	9	0.000940559	Afu2g10090-T|Afu1g06770-T|Afu7g04490-T|Afu1g05340-T|Afu3g13320-T|Afu1g05630-T|Afu7g01460-T|Afu6g12660-T	http://amigo.geneontology.org/cgi-bin/amigo/term_details?term=GO:0051029
glucose metabolic process	Gene Ontology	GO:0006006	14	28	0.000964447	Afu8g02560-T|Afu4g11310-T|Afu4g07710-T|Afu3g11070-T|Afu7g05800-T|Afu3g11690-T|Afu2g01700-T|Afu6g07720-T|Afu5g14530-T|Afu6g02230-T|Afu5g06240-T|Afu6g07430-T|Afu5g01970-T|Afu5g01030-T	http://amigo.geneontology.org/cgi-bin/amigo/term_details?term=GO:0006006
quinone biosynthetic process	Gene Ontology	GO:1901663	14	28	0.000964447	Afu3g06120-T|Afu4g09810-T|Afu4g00210-T|Afu6g00660-T|Afu6g04380-T|Afu2g01890-T|Afu6g08850-T|Afu4g12930-T|Afu4g00220-T|Afu5g10310-T|Afu3g06410-T|Afu4g00230-T|Afu7g00160-T|Afu1g03195-T	http://amigo.geneontology.org/cgi-bin/amigo/term_details?term=GO:1901663
nucleoside diphosphate metabolic process	Gene Ontology	GO:0009132	11	18	0.000999213	Afu1g06960-T|Afu5g03490-T|Afu3g11070-T|Afu4g00960-T|Afu3g11690-T|Afu1g07530-T|Afu6g02230-T|Afu5g06240-T|Afu6g07430-T|Afu5g13840-T|Afu5g03460-T	http://amigo.geneontology.org/cgi-bin/amigo/term_details?term=GO:0009132
cytoplasmic translation	Gene Ontology	GO:0002181	15	32	0.00107068	Afu2g10100-T|Afu5g06360-T|Afu1g12940-T|Afu4g07660-T|Afu1g11130-T|Afu8g03930-T|Afu6g13250-T|Afu1g09330-T|Afu3g08640-T|Afu3g13320-T|Afu1g05080-T|Afu1g09100-T|Afu1g03110-T|Afu1g06830-T|Afu4g07435-T	http://amigo.geneontology.org/cgi-bin/amigo/term_details?term=GO:0002181
cofactor biosynthetic process	Gene Ontology	GO:0051188	32	103	0.00113877	Afu3g06120-T|Afu8g04650-T|Afu6g08850-T|Afu2g07680-T|Afu5g11210-T|Afu4g09810-T|Afu6g05320-T|Afu2g01890-T|Afu1g17200-T|Afu1g06960-T|Afu6g08440-T|Afu3g03400-T|Afu4g12930-T|Afu3g13120-T|Afu6g04380-T|Afu1g03195-T|Afu1g07480-T|Afu8g05330-T|Afu6g00660-T|Afu7g05720-T|Afu5g03140-T|Afu3g06410-T|Afu7g00160-T|Afu4g00230-T|Afu1g17190-T|Afu1g05060-T|Afu4g00210-T|Afu1g10630-T|Afu4g00220-T|Afu6g07670-T|Afu5g1031…	http://amigo.geneontology.org/cgi-bin/amigo/term_details?term=GO:0051188
hexose metabolic process	Gene Ontology	GO:0019318	17	40	0.00120322	Afu8g02560-T|Afu4g11310-T|Afu2g11560-T|Afu3g08200-T|Afu3g11070-T|Afu7g05800-T|Afu3g11690-T|Afu2g01700-T|Afu6g07720-T|Afu5g14530-T|Afu6g02230-T|Afu5g06240-T|Afu6g07430-T|Afu5g01970-T|Afu5g01030-T|Afu4g07710-T|Afu1g13280-T	http://amigo.geneontology.org/cgi-bin/amigo/term_details?term=GO:0019318
quinone metabolic process	Gene Ontology	GO:1901661	14	29	0.00125225	Afu3g06120-T|Afu4g09810-T|Afu4g00210-T|Afu6g00660-T|Afu6g04380-T|Afu2g01890-T|Afu6g08850-T|Afu4g12930-T|Afu4g00220-T|Afu5g10310-T|Afu3g06410-T|Afu4g00230-T|Afu7g00160-T|Afu1g03195-T	http://amigo.geneontology.org/cgi-bin/amigo/term_details?term=GO:1901661
nucleotide metabolic process	Gene Ontology	GO:0009117	37	127	0.00130121	Afu1g13500-T|Afu4g09360-T|Afu1g16280-T|Afu8g04650-T|Afu8g00850-T|Afu3g11690-T|Afu2g03700-T|Afu3g07810-T|Afu8g05320-T|Afu3g14440-T|Afu6g05320-T|Afu2g10855-T|Afu2g11780-T|Afu1g06960-T|Afu1g03420-T|Afu5g10550-T|Afu3g11070-T|Afu6g11620-T|Afu2g03610-T|Afu6g07430-T|Afu7g02310-T|Afu3g07640-T|Afu2g11940-T|Afu6g10610-T|Afu5g03490-T|Afu1g15450-T|Afu5g13840-T|Afu5g10560-T|Afu6g08730-T|Afu4g00960-T|Afu1g0753…	http://amigo.geneontology.org/cgi-bin/amigo/term_details?term=GO:0009117
translational elongation	Gene Ontology	GO:0006414	11	19	0.00138455	Afu2g10100-T|Afu1g05080-T|Afu4g08110-T|Afu7g01460-T|Afu1g09440-T|Afu8g03930-T|Afu6g13250-T|Afu2g13530-T|Afu1g11190-T|Afu1g12170-T|Afu1g06830-T	http://amigo.geneontology.org/cgi-bin/amigo/term_details?term=GO:0006414
nucleobase-containing small molecule metabolic process	Gene Ontology	GO:0055086	45	166	0.0014484	Afu1g13500-T|Afu4g09360-T|Afu3g00830-T|Afu1g16280-T|Afu8g04650-T|Afu8g00850-T|Afu6g11620-T|Afu5g14582-T|Afu3g11690-T|Afu2g03700-T|Afu3g07810-T|Afu8g05320-T|Afu3g14440-T|Afu2g11940-T|Afu6g05320-T|Afu2g10855-T|Afu2g11780-T|Afu1g06960-T|Afu1g03420-T|Afu5g10550-T|Afu3g11070-T|Afu8g02770-T|Afu5g06390-T|Afu2g03610-T|Afu6g07430-T|Afu7g02310-T|Afu4g07360-T|Afu3g07640-T|Afu2g02120-T|Afu8g05330-T|Afu6g1061…	http://amigo.geneontology.org/cgi-bin/amigo/term_details?term=GO:0055086
nucleotide phosphorylation	Gene Ontology	GO:0046939	10	16	0.0014929	Afu1g06960-T|Afu1g03420-T|Afu5g03490-T|Afu1g07530-T|Afu4g00960-T|Afu3g11690-T|Afu6g02230-T|Afu6g07430-T|Afu5g13840-T|Afu5g03460-T	http://amigo.geneontology.org/cgi-bin/amigo/term_details?term=GO:0046939
alcohol metabolic process	Gene Ontology	GO:0006066	28	88	0.00168791	Afu1g16850-T|Afu3g03410-T|Afu2g03700-T|Afu2g07680-T|Afu2g10660-T|Afu2g11550-T|Afu3g11070-T|Afu8g00230-T|Afu3g03400-T|Afu8g00200-T|Afu4g11500-T|Afu4g03630-T|Afu1g04540-T|Afu7g03740-T|Afu8g02000-T|Afu8g00370-T|Afu2g18030-T|Afu8g00910-T|Afu2g01290-T|Afu5g07780-T|Afu6g12070-T|Afu6g13990-T|Afu4g11310-T|Afu1g17190-T|Afu2g18050-T|Afu4g11730-T|Afu5g06240-T|Afu3g03420-T	http://amigo.geneontology.org/cgi-bin/amigo/term_details?term=GO:0006066
secondary alcohol biosynthetic process	Gene Ontology	GO:1902653	16	38	0.00179101	Afu2g03700-T|Afu8g00370-T|Afu1g17190-T|Afu2g11550-T|Afu3g03410-T|Afu8g00910-T|Afu3g03400-T|Afu2g01290-T|Afu2g07680-T|Afu5g07780-T|Afu6g12070-T|Afu4g11500-T|Afu3g03420-T|Afu4g03630-T|Afu1g04540-T|Afu7g03740-T	http://amigo.geneontology.org/cgi-bin/amigo/term_details?term=GO:1902653
secondary alcohol metabolic process	Gene Ontology	GO:1902652	16	39	0.00221023	Afu2g03700-T|Afu8g00370-T|Afu1g17190-T|Afu2g11550-T|Afu3g03410-T|Afu8g00910-T|Afu3g03400-T|Afu2g01290-T|Afu2g07680-T|Afu5g07780-T|Afu6g12070-T|Afu4g11500-T|Afu3g03420-T|Afu4g03630-T|Afu1g04540-T|Afu7g03740-T	http://amigo.geneontology.org/cgi-bin/amigo/term_details?term=GO:1902652
monosaccharide metabolic process	Gene Ontology	GO:0005996	18	47	0.00222324	Afu4g14650-T|Afu8g02560-T|Afu4g11310-T|Afu2g11560-T|Afu3g08200-T|Afu3g11070-T|Afu7g05800-T|Afu3g11690-T|Afu2g01700-T|Afu6g07720-T|Afu5g14530-T|Afu6g02230-T|Afu5g06240-T|Afu6g07430-T|Afu5g01970-T|Afu5g01030-T|Afu4g07710-T|Afu1g13280-T	http://amigo.geneontology.org/cgi-bin/amigo/term_details?term=GO:0005996
purine ribonucleoside diphosphate metabolic process	Gene Ontology	GO:0009179	9	14	0.00223073	Afu1g06960-T|Afu4g00960-T|Afu3g11070-T|Afu3g11690-T|Afu1g07530-T|Afu6g02230-T|Afu5g06240-T|Afu6g07430-T|Afu5g13840-T	http://amigo.geneontology.org/cgi-bin/amigo/term_details?term=GO:0009179
purine nucleoside diphosphate metabolic process	Gene Ontology	GO:0009135	9	14	0.00223073	Afu1g06960-T|Afu4g00960-T|Afu3g11070-T|Afu3g11690-T|Afu1g07530-T|Afu6g02230-T|Afu5g06240-T|Afu6g07430-T|Afu5g13840-T	http://amigo.geneontology.org/cgi-bin/amigo/term_details?term=GO:0009135
ADP metabolic process	Gene Ontology	GO:0046031	9	14	0.00223073	Afu1g06960-T|Afu4g00960-T|Afu3g11070-T|Afu3g11690-T|Afu1g07530-T|Afu6g02230-T|Afu5g06240-T|Afu6g07430-T|Afu5g13840-T	http://amigo.geneontology.org/cgi-bin/amigo/term_details?term=GO:0046031
nucleoside phosphate metabolic process	Gene Ontology	GO:0006753	37	132	0.00228371	Afu1g13500-T|Afu4g09360-T|Afu1g16280-T|Afu8g04650-T|Afu8g00850-T|Afu3g11690-T|Afu2g03700-T|Afu3g07810-T|Afu8g05320-T|Afu3g14440-T|Afu6g05320-T|Afu2g10855-T|Afu2g11780-T|Afu1g06960-T|Afu1g03420-T|Afu5g10550-T|Afu3g11070-T|Afu6g11620-T|Afu2g03610-T|Afu6g07430-T|Afu7g02310-T|Afu3g07640-T|Afu2g11940-T|Afu6g10610-T|Afu5g03490-T|Afu1g15450-T|Afu5g13840-T|Afu5g10560-T|Afu6g08730-T|Afu4g00960-T|Afu1g0753…	http://amigo.geneontology.org/cgi-bin/amigo/term_details?term=GO:0006753
sterol biosynthetic process	Gene Ontology	GO:0016126	13	28	0.00242085	Afu1g17190-T|Afu2g11550-T|Afu3g03410-T|Afu4g07130-T|Afu3g03400-T|Afu2g03700-T|Afu2g07680-T|Afu5g07780-T|Afu4g11500-T|Afu3g03420-T|Afu4g03630-T|Afu1g04540-T|Afu7g03740-T	http://amigo.geneontology.org/cgi-bin/amigo/term_details?term=GO:0016126
organophosphate metabolic process	Gene Ontology	GO:0019637	53	212	0.002616	Afu1g13500-T|Afu1g16850-T|Afu1g08810-T|Afu1g16280-T|Afu8g04650-T|Afu8g00850-T|Afu3g11690-T|Afu4g07130-T|Afu2g03700-T|Afu2g15580-T|Afu5g11210-T|Afu5g13840-T|Afu8g05320-T|Afu3g14440-T|Afu7g05580-T|Afu6g05320-T|Afu2g10855-T|Afu1g03420-T|Afu2g11780-T|Afu1g06960-T|Afu1g15820-T|Afu5g10550-T|Afu2g11940-T|Afu3g11070-T|Afu6g00260-T|Afu2g14040-T|Afu6g11620-T|Afu1g14140-T|Afu2g03610-T|Afu6g07430-T|Afu4g0936…	http://amigo.geneontology.org/cgi-bin/amigo/term_details?term=GO:0019637
energy derivation by oxidation of organic compounds	Gene Ontology	GO:0015980	20	57	0.00299447	Afu2g03730-T|Afu1g02140-T|Afu3g11070-T|Afu6g12930-T|Afu1g05390-T|Afu6g10660-T|Afu6g08850-T|Afu3g06190-T|Afu5g14530-T|Afu6g02230-T|Afu5g06240-T|Afu5g04230-T|Afu2g05060-T|Afu3g07810-T|Afu4g06790-T|Afu5g10560-T|Afu2g03010-T|Afu5g03610-T|Afu3g14440-T|Afu5g02480-T	http://amigo.geneontology.org/cgi-bin/amigo/term_details?term=GO:0015980
metabolic process	Gene Ontology	GO:0008152	552	3127	0.0030364	Afu2g06310-T|Afu8g06080-T|Afu6g10120-T|Afu8g02770-T|Afu8g05460-T|Afu1g08810-T|Afu1g15730-T|Afu2g16370-T|Afu2g09650-T|Afu1g09754-T|Afu4g07845-T|Afu8g00490-T|Afu2g00930-T|Afu4g12930-T|Afu8g05140-T|Afu4g13170-T|Afu6g08590-T|Afu3g02840-T|Afu4g08110-T|Afu4g08410-T|Afu7g05800-T|Afu4g03410-T|Afu7g01980-T|Afu8g00220-T|Afu8g04050-T|Afu1g04040-T|Afu1g15620-T|Afu1g01600-T|Afu6g13945-T|Afu1g03690-T|Afu2g0370…	http://amigo.geneontology.org/cgi-bin/amigo/term_details?term=GO:0008152
purine nucleoside biosynthetic process	Gene Ontology	GO:0042451	12	26	0.00365108	Afu3g07640-T|Afu1g16280-T|Afu2g11940-T|Afu5g10550-T|Afu5g03490-T|Afu1g07530-T|Afu2g02120-T|Afu5g06390-T|Afu1g15450-T|Afu8g05320-T|Afu7g02310-T|Afu4g09360-T	http://amigo.geneontology.org/cgi-bin/amigo/term_details?term=GO:0042451
cellular lipid biosynthetic process	Gene Ontology	GO:0097384	12	26	0.00365108	Afu1g17190-T|Afu2g11550-T|Afu3g03410-T|Afu3g03400-T|Afu2g03700-T|Afu2g07680-T|Afu5g07780-T|Afu4g11500-T|Afu3g03420-T|Afu4g03630-T|Afu1g04540-T|Afu7g03740-T	http://amigo.geneontology.org/cgi-bin/amigo/term_details?term=GO:0097384
purine ribonucleoside biosynthetic process	Gene Ontology	GO:0046129	12	26	0.00365108	Afu3g07640-T|Afu1g16280-T|Afu2g11940-T|Afu5g10550-T|Afu5g03490-T|Afu1g07530-T|Afu2g02120-T|Afu5g06390-T|Afu1g15450-T|Afu8g05320-T|Afu7g02310-T|Afu4g09360-T	http://amigo.geneontology.org/cgi-bin/amigo/term_details?term=GO:0046129
ergosterol biosynthetic process	Gene Ontology	GO:0006696	12	26	0.00365108	Afu1g17190-T|Afu2g11550-T|Afu3g03410-T|Afu3g03400-T|Afu2g03700-T|Afu2g07680-T|Afu5g07780-T|Afu4g11500-T|Afu3g03420-T|Afu4g03630-T|Afu1g04540-T|Afu7g03740-T	http://amigo.geneontology.org/cgi-bin/amigo/term_details?term=GO:0006696
phytosteroid biosynthetic process	Gene Ontology	GO:0016129	12	26	0.00365108	Afu1g17190-T|Afu2g11550-T|Afu3g03410-T|Afu3g03400-T|Afu2g03700-T|Afu2g07680-T|Afu5g07780-T|Afu4g11500-T|Afu3g03420-T|Afu4g03630-T|Afu1g04540-T|Afu7g03740-T	http://amigo.geneontology.org/cgi-bin/amigo/term_details?term=GO:0016129
cellular alcohol biosynthetic process	Gene Ontology	GO:0044108	12	26	0.00365108	Afu1g17190-T|Afu2g11550-T|Afu3g03410-T|Afu3g03400-T|Afu2g03700-T|Afu2g07680-T|Afu5g07780-T|Afu4g11500-T|Afu3g03420-T|Afu4g03630-T|Afu1g04540-T|Afu7g03740-T	http://amigo.geneontology.org/cgi-bin/amigo/term_details?term=GO:0044108
phenol-containing compound biosynthetic process	Gene Ontology	GO:0046189	16	42	0.00398362	Afu3g12930-T|Afu8g00370-T|Afu2g17600-T|Afu4g00210-T|Afu2g17580-T|Afu5g10310-T|Afu1g03195-T|Afu8g00250-T|Afu2g01290-T|Afu2g17530-T|Afu4g00220-T|Afu8g00620-T|Afu2g17540-T|Afu7g00160-T|Afu4g00230-T|Afu6g12060-T	http://amigo.geneontology.org/cgi-bin/amigo/term_details?term=GO:0046189
cellular nitrogen compound biosynthetic process	Gene Ontology	GO:0044271	176	895	0.00430407	Afu8g00420-T|Afu5g01272-T|Afu8g00100-T|Afu5g05510-T|Afu6g11620-T|Afu2g02120-T|Afu1g06340-T|Afu6g07670-T|Afu6g12050-T|Afu2g16370-T|Afu8g05460-T|Afu3g07640-T|Afu2g03590-T|Afu6g11260-T|Afu1g16210-T|Afu1g11130-T|Afu4g07845-T|Afu2g03610-T|Afu1g03110-T|Afu4g13170-T|Afu6g12060-T|Afu6g12580-T|Afu1g07530-T|Afu5g02470-T|Afu5g03490-T|Afu4g08410-T|Afu1g09330-T|Afu5g03140-T|Afu4g08330-T|Afu1g04320-T|Afu5g1384…	http://amigo.geneontology.org/cgi-bin/amigo/term_details?term=GO:0044271
ribonucleoside diphosphate metabolic process	Gene Ontology	GO:0009185	9	16	0.00431873	Afu1g06960-T|Afu4g00960-T|Afu3g11070-T|Afu3g11690-T|Afu1g07530-T|Afu6g02230-T|Afu5g06240-T|Afu6g07430-T|Afu5g13840-T	http://amigo.geneontology.org/cgi-bin/amigo/term_details?term=GO:0009185
phytosteroid metabolic process	Gene Ontology	GO:0016128	12	27	0.00462816	Afu1g17190-T|Afu2g11550-T|Afu3g03410-T|Afu3g03400-T|Afu2g03700-T|Afu2g07680-T|Afu5g07780-T|Afu4g11500-T|Afu3g03420-T|Afu4g03630-T|Afu1g04540-T|Afu7g03740-T	http://amigo.geneontology.org/cgi-bin/amigo/term_details?term=GO:0016128
ergosterol metabolic process	Gene Ontology	GO:0008204	12	27	0.00462816	Afu1g17190-T|Afu2g11550-T|Afu3g03410-T|Afu3g03400-T|Afu2g03700-T|Afu2g07680-T|Afu5g07780-T|Afu4g11500-T|Afu3g03420-T|Afu4g03630-T|Afu1g04540-T|Afu7g03740-T	http://amigo.geneontology.org/cgi-bin/amigo/term_details?term=GO:0008204
single-organism process	Gene Ontology	GO:0044699	408	2274	0.00549939	Afu8g06080-T|Afu6g10120-T|Afu8g02770-T|Afu8g05460-T|Afu1g08810-T|Afu2g09650-T|Afu8g00490-T|Afu4g12930-T|Afu8g05140-T|Afu4g13170-T|Afu3g02840-T|Afu1g02550-T|Afu4g01450-T|Afu7g05800-T|Afu4g03410-T|Afu2g01660-T|Afu5g01180-T|Afu7g01980-T|Afu6g08660-T|Afu8g00220-T|Afu4g04670-T|Afu1g01600-T|Afu6g13945-T|Afu1g03690-T|Afu2g03700-T|Afu6g10880-T|Afu5g09450-T|Afu3g08010-T|Afu1g03610-T|Afu1g15780-T|Afu4g0981…	http://amigo.geneontology.org/cgi-bin/amigo/term_details?term=GO:0044699
phenol-containing compound metabolic process	Gene Ontology	GO:0018958	17	48	0.00552237	Afu3g12930-T|Afu8g00370-T|Afu2g17600-T|Afu4g00210-T|Afu2g17580-T|Afu5g10310-T|Afu1g03195-T|Afu2g02910-T|Afu8g00250-T|Afu2g01290-T|Afu2g17530-T|Afu4g00220-T|Afu8g00620-T|Afu2g17540-T|Afu7g00160-T|Afu4g00230-T|Afu6g12060-T	http://amigo.geneontology.org/cgi-bin/amigo/term_details?term=GO:0018958
cellular alcohol metabolic process	Gene Ontology	GO:0044107	12	28	0.00580332	Afu1g17190-T|Afu2g11550-T|Afu3g03410-T|Afu3g03400-T|Afu2g03700-T|Afu2g07680-T|Afu5g07780-T|Afu4g11500-T|Afu3g03420-T|Afu4g03630-T|Afu1g04540-T|Afu7g03740-T	http://amigo.geneontology.org/cgi-bin/amigo/term_details?term=GO:0044107
cellular response to iron ion starvation	Gene Ontology	GO:0010106	9	17	0.00581476	Afu1g17200-T|Afu2g07680-T|Afu3g03410-T|Afu5g03800-T|Afu3g02270-T|Afu1g17190-T|Afu5g03790-T|Afu3g03420-T|Afu3g03440-T	http://amigo.geneontology.org/cgi-bin/amigo/term_details?term=GO:0010106
ribonucleoside biosynthetic process	Gene Ontology	GO:0042455	13	32	0.00593104	Afu3g07640-T|Afu1g16280-T|Afu2g11940-T|Afu5g10550-T|Afu5g03490-T|Afu1g07530-T|Afu2g02120-T|Afu5g06390-T|Afu1g15450-T|Afu2g08360-T|Afu8g05320-T|Afu7g02310-T|Afu4g09360-T	http://amigo.geneontology.org/cgi-bin/amigo/term_details?term=GO:0042455
nucleoside biosynthetic process	Gene Ontology	GO:0009163	13	32	0.00593104	Afu3g07640-T|Afu1g16280-T|Afu2g11940-T|Afu5g10550-T|Afu5g03490-T|Afu1g07530-T|Afu2g02120-T|Afu5g06390-T|Afu1g15450-T|Afu2g08360-T|Afu8g05320-T|Afu7g02310-T|Afu4g09360-T	http://amigo.geneontology.org/cgi-bin/amigo/term_details?term=GO:0009163
steroid biosynthetic process	Gene Ontology	GO:0006694	13	32	0.00593104	Afu1g17190-T|Afu2g11550-T|Afu3g03410-T|Afu4g07130-T|Afu3g03400-T|Afu2g03700-T|Afu2g07680-T|Afu5g07780-T|Afu4g11500-T|Afu3g03420-T|Afu4g03630-T|Afu1g04540-T|Afu7g03740-T	http://amigo.geneontology.org/cgi-bin/amigo/term_details?term=GO:0006694
sterol metabolic process	Gene Ontology	GO:0016125	14	36	0.00593971	Afu1g17190-T|Afu2g11550-T|Afu3g03410-T|Afu4g07130-T|Afu3g03400-T|Afu2g03700-T|Afu2g07680-T|Afu5g07780-T|Afu8g02590-T|Afu4g11500-T|Afu3g03420-T|Afu4g03630-T|Afu1g04540-T|Afu7g03740-T	http://amigo.geneontology.org/cgi-bin/amigo/term_details?term=GO:0016125
coenzyme biosynthetic process	Gene Ontology	GO:0009108	23	75	0.00604322	Afu3g06120-T|Afu8g04650-T|Afu6g08850-T|Afu5g11210-T|Afu6g05320-T|Afu2g01890-T|Afu1g06960-T|Afu4g12930-T|Afu6g04380-T|Afu1g03195-T|Afu4g09810-T|Afu8g05330-T|Afu6g00660-T|Afu7g05720-T|Afu5g03140-T|Afu3g06410-T|Afu7g00160-T|Afu4g00230-T|Afu4g00210-T|Afu1g10630-T|Afu4g00220-T|Afu5g10310-T|Afu3g04170-T	http://amigo.geneontology.org/cgi-bin/amigo/term_details?term=GO:0009108
lipid biosynthetic process	Gene Ontology	GO:0008610	37	142	0.00625242	Afu1g16850-T|Afu3g06120-T|Afu3g12120-T|Afu8g02440-T|Afu6g04290-T|Afu3g03410-T|Afu4g07130-T|Afu2g03700-T|Afu2g07680-T|Afu7g05350-T|Afu1g15820-T|Afu2g11550-T|Afu6g00260-T|Afu5g01590-T|Afu1g14140-T|Afu3g03400-T|Afu3g09960-T|Afu4g11500-T|Afu8g07210-T|Afu4g03630-T|Afu1g04540-T|Afu7g03740-T|Afu6g12080-T|Afu8g00370-T|Afu7g05920-T|Afu2g01290-T|Afu8g00170-T|Afu5g07780-T|Afu2g11540-T|Afu1g17190-T|Afu6g0305…	http://amigo.geneontology.org/cgi-bin/amigo/term_details?term=GO:0008610
purine-containing compound biosynthetic process	Gene Ontology	GO:0072522	17	49	0.00651088	Afu3g07640-T|Afu2g10855-T|Afu1g16280-T|Afu8g05330-T|Afu5g10550-T|Afu5g03490-T|Afu1g07530-T|Afu2g02120-T|Afu6g11620-T|Afu5g06390-T|Afu4g07360-T|Afu2g03610-T|Afu1g15450-T|Afu8g05320-T|Afu7g02310-T|Afu4g09360-T|Afu2g11940-T	http://amigo.geneontology.org/cgi-bin/amigo/term_details?term=GO:0072522
aerobic respiration	Gene Ontology	GO:0009060	11	25	0.00698402	Afu2g03730-T|Afu4g06790-T|Afu1g05390-T|Afu6g10660-T|Afu6g08850-T|Afu3g06190-T|Afu5g04230-T|Afu2g05060-T|Afu3g07810-T|Afu2g03010-T|Afu6g12930-T	http://amigo.geneontology.org/cgi-bin/amigo/term_details?term=GO:0009060
glycosyl compound biosynthetic process	Gene Ontology	GO:1901659	13	34	0.00879719	Afu3g07640-T|Afu1g16280-T|Afu2g11940-T|Afu5g10550-T|Afu5g03490-T|Afu1g07530-T|Afu2g02120-T|Afu5g06390-T|Afu1g15450-T|Afu2g08360-T|Afu8g05320-T|Afu7g02310-T|Afu4g09360-T	http://amigo.geneontology.org/cgi-bin/amigo/term_details?term=GO:1901659
organic heteropentacyclic compound biosynthetic process	Gene Ontology	GO:1901378	17	51	0.00891625	Afu8g06080-T|Afu3g12120-T|Afu4g00210-T|Afu6g13790-T|Afu5g10310-T|Afu3g08010-T|Afu8g00250-T|Afu4g03410-T|Afu2g01290-T|Afu8g00370-T|Afu7g00290-T|Afu6g12180-T|Afu8g00200-T|Afu8g00170-T|Afu5g13840-T|Afu7g00160-T|Afu1g03195-T	http://amigo.geneontology.org/cgi-bin/amigo/term_details?term=GO:1901378
organic heteropentacyclic compound metabolic process	Gene Ontology	GO:1901376	17	51	0.00891625	Afu8g06080-T|Afu3g12120-T|Afu4g00210-T|Afu6g13790-T|Afu5g10310-T|Afu3g08010-T|Afu8g00250-T|Afu4g03410-T|Afu2g01290-T|Afu8g00370-T|Afu7g00290-T|Afu6g12180-T|Afu8g00200-T|Afu8g00170-T|Afu5g13840-T|Afu7g00160-T|Afu1g03195-T	http://amigo.geneontology.org/cgi-bin/amigo/term_details?term=GO:1901376
positive regulation by organism of defense response of other organism involved in symbiotic interaction	Gene Ontology	GO:0052510	7	12	0.0100449	Afu6g12930-T|Afu4g07360-T|Afu3g11690-T|Afu8g03930-T|Afu2g03610-T|Afu6g07430-T|Afu5g01970-T	http://amigo.geneontology.org/cgi-bin/amigo/term_details?term=GO:0052510
induction by symbiont of host defense response	Gene Ontology	GO:0044416	7	12	0.0100449	Afu6g12930-T|Afu4g07360-T|Afu3g11690-T|Afu8g03930-T|Afu2g03610-T|Afu6g07430-T|Afu5g01970-T	http://amigo.geneontology.org/cgi-bin/amigo/term_details?term=GO:0044416
nucleoside diphosphate phosphorylation	Gene Ontology	GO:0006165	7	12	0.0100449	Afu1g06960-T|Afu4g00960-T|Afu5g03490-T|Afu3g11690-T|Afu6g02230-T|Afu6g07430-T|Afu5g13840-T	http://amigo.geneontology.org/cgi-bin/amigo/term_details?term=GO:0006165
induction by organism of defense response of other organism involved in symbiotic interaction	Gene Ontology	GO:0052251	7	12	0.0100449	Afu6g12930-T|Afu4g07360-T|Afu3g11690-T|Afu8g03930-T|Afu2g03610-T|Afu6g07430-T|Afu5g01970-T	http://amigo.geneontology.org/cgi-bin/amigo/term_details?term=GO:0052251
ubiquinone biosynthetic process	Gene Ontology	GO:0006744	7	12	0.0100449	Afu3g06120-T|Afu4g09810-T|Afu6g04380-T|Afu2g01890-T|Afu6g08850-T|Afu4g12930-T|Afu3g06410-T	http://amigo.geneontology.org/cgi-bin/amigo/term_details?term=GO:0006744
positive regulation by symbiont of host defense response	Gene Ontology	GO:0052509	7	12	0.0100449	Afu6g12930-T|Afu4g07360-T|Afu3g11690-T|Afu8g03930-T|Afu2g03610-T|Afu6g07430-T|Afu5g01970-T	http://amigo.geneontology.org/cgi-bin/amigo/term_details?term=GO:0052509
ubiquinone metabolic process	Gene Ontology	GO:0006743	7	12	0.0100449	Afu3g06120-T|Afu4g09810-T|Afu6g04380-T|Afu2g01890-T|Afu6g08850-T|Afu4g12930-T|Afu3g06410-T	http://amigo.geneontology.org/cgi-bin/amigo/term_details?term=GO:0006743
positive regulation of defense response	Gene Ontology	GO:0031349	7	12	0.0100449	Afu6g12930-T|Afu4g07360-T|Afu3g11690-T|Afu8g03930-T|Afu2g03610-T|Afu6g07430-T|Afu5g01970-T	http://amigo.geneontology.org/cgi-bin/amigo/term_details?term=GO:0031349
cellular respiration	Gene Ontology	GO:0045333	13	35	0.0105879	Afu2g03730-T|Afu4g06790-T|Afu1g05390-T|Afu6g10660-T|Afu6g08850-T|Afu3g06190-T|Afu5g04230-T|Afu2g05060-T|Afu3g07810-T|Afu5g10560-T|Afu2g03010-T|Afu3g14440-T|Afu6g12930-T	http://amigo.geneontology.org/cgi-bin/amigo/term_details?term=GO:0045333
iron assimilation	Gene Ontology	GO:0033212	5	6	0.0108459	Afu5g03800-T|Afu2g07680-T|Afu3g03660-T|Afu1g17200-T|Afu5g03790-T	http://amigo.geneontology.org/cgi-bin/amigo/term_details?term=GO:0033212
cellular ketone metabolic process	Gene Ontology	GO:0042180	25	90	0.0118767	Afu3g06120-T|Afu2g17600-T|Afu6g08850-T|Afu8g00620-T|Afu2g17580-T|Afu2g01890-T|Afu4g12930-T|Afu4g13170-T|Afu1g03195-T|Afu8g00370-T|Afu4g09810-T|Afu6g00660-T|Afu6g04380-T|Afu2g01290-T|Afu6g12070-T|Afu3g06410-T|Afu7g00160-T|Afu4g00230-T|Afu3g12930-T|Afu8g00910-T|Afu4g00210-T|Afu8g00250-T|Afu4g00220-T|Afu6g12060-T|Afu5g10310-T	http://amigo.geneontology.org/cgi-bin/amigo/term_details?term=GO:0042180
nicotinamide nucleotide metabolic process	Gene Ontology	GO:0046496	14	40	0.0121549	Afu6g05320-T|Afu1g13500-T|Afu1g06960-T|Afu8g04650-T|Afu6g10610-T|Afu4g00960-T|Afu3g11070-T|Afu3g11690-T|Afu6g08730-T|Afu6g02230-T|Afu5g06240-T|Afu6g07430-T|Afu5g13840-T|Afu2g11780-T	http://amigo.geneontology.org/cgi-bin/amigo/term_details?term=GO:0046496
pyridine nucleotide metabolic process	Gene Ontology	GO:0019362	14	40	0.0121549	Afu6g05320-T|Afu1g13500-T|Afu1g06960-T|Afu8g04650-T|Afu6g10610-T|Afu4g00960-T|Afu3g11070-T|Afu3g11690-T|Afu6g08730-T|Afu6g02230-T|Afu5g06240-T|Afu6g07430-T|Afu5g13840-T|Afu2g11780-T	http://amigo.geneontology.org/cgi-bin/amigo/term_details?term=GO:0019362
cellular lipid metabolic process	Gene Ontology	GO:0044255	49	212	0.0126161	Afu1g16850-T|Afu3g06120-T|Afu3g12120-T|Afu7g05580-T|Afu8g05580-T|Afu2g14040-T|Afu3g03410-T|Afu4g07130-T|Afu2g03700-T|Afu2g15580-T|Afu7g05920-T|Afu8g02590-T|Afu4g04200-T|Afu7g05350-T|Afu5g09970-T|Afu8g02440-T|Afu2g11550-T|Afu6g00260-T|Afu6g04290-T|Afu5g01590-T|Afu1g14140-T|Afu3g03400-T|Afu3g09960-T|Afu8g07120-T|Afu4g11500-T|Afu8g07210-T|Afu1g11600-T|Afu4g03630-T|Afu1g04540-T|Afu7g03740-T|Afu2g1361…	http://amigo.geneontology.org/cgi-bin/amigo/term_details?term=GO:0044255
pigment biosynthetic process	Gene Ontology	GO:0046148	13	36	0.0126495	Afu2g10855-T|Afu1g05060-T|Afu8g05330-T|Afu4g07360-T|Afu1g07480-T|Afu7g01430-T|Afu2g17530-T|Afu3g13120-T|Afu6g07670-T|Afu2g17600-T|Afu2g17540-T|Afu7g02310-T|Afu2g17580-T	http://amigo.geneontology.org/cgi-bin/amigo/term_details?term=GO:0046148
rRNA-containing ribonucleoprotein complex export from nucleus	Gene Ontology	GO:0071428	10	24	0.0131735	Afu2g10090-T|Afu1g06770-T|Afu8g03930-T|Afu1g04040-T|Afu7g04490-T|Afu1g05340-T|Afu3g13320-T|Afu1g05630-T|Afu7g01460-T|Afu6g12660-T	http://amigo.geneontology.org/cgi-bin/amigo/term_details?term=GO:0071428
pyridine-containing compound metabolic process	Gene Ontology	GO:0072524	15	45	0.0135474	Afu3g14110-T|Afu6g05320-T|Afu1g06960-T|Afu8g04650-T|Afu6g10610-T|Afu4g00960-T|Afu3g11070-T|Afu3g11690-T|Afu1g13500-T|Afu6g08730-T|Afu6g02230-T|Afu5g06240-T|Afu6g07430-T|Afu5g13840-T|Afu2g11780-T	http://amigo.geneontology.org/cgi-bin/amigo/term_details?term=GO:0072524
pigment metabolic process	Gene Ontology	GO:0042440	14	41	0.0143046	Afu2g10855-T|Afu3g13120-T|Afu1g05060-T|Afu8g05330-T|Afu4g07360-T|Afu1g07480-T|Afu7g01430-T|Afu2g17530-T|Afu5g03790-T|Afu6g07670-T|Afu2g17600-T|Afu2g17540-T|Afu7g02310-T|Afu2g17580-T	http://amigo.geneontology.org/cgi-bin/amigo/term_details?term=GO:0042440
monocarboxylic acid metabolic process	Gene Ontology	GO:0032787	31	122	0.0153433	Afu1g16850-T|Afu3g12120-T|Afu8g02440-T|Afu3g11690-T|Afu7g05920-T|Afu7g05350-T|Afu5g09970-T|Afu1g06960-T|Afu8g05580-T|Afu3g11070-T|Afu6g02230-T|Afu6g07430-T|Afu1g15780-T|Afu5g14790-T|Afu2g13610-T|Afu6g04820-T|Afu6g03540-T|Afu7g02420-T|Afu7g05720-T|Afu2g16930-T|Afu5g13840-T|Afu4g13510-T|Afu1g15820-T|Afu2g11540-T|Afu6g03050-T|Afu4g00960-T|Afu4g07710-T|Afu2g00320-T|Afu5g06240-T|Afu3g04220-T|Afu3g0417…	http://amigo.geneontology.org/cgi-bin/amigo/term_details?term=GO:0032787
ATP generation from ADP	Gene Ontology	GO:0006757	6	10	0.0154345	Afu1g06960-T|Afu4g00960-T|Afu3g11690-T|Afu6g02230-T|Afu6g07430-T|Afu5g13840-T	http://amigo.geneontology.org/cgi-bin/amigo/term_details?term=GO:0006757
glycolytic process	Gene Ontology	GO:0006096	6	10	0.0154345	Afu1g06960-T|Afu4g00960-T|Afu3g11690-T|Afu6g02230-T|Afu6g07430-T|Afu5g13840-T	http://amigo.geneontology.org/cgi-bin/amigo/term_details?term=GO:0006096
carbohydrate derivative metabolic process	Gene Ontology	GO:1901135	54	242	0.0159086	Afu1g13500-T|Afu1g16850-T|Afu3g00830-T|Afu1g16280-T|Afu6g04290-T|Afu6g11620-T|Afu2g11560-T|Afu5g14582-T|Afu3g11690-T|Afu1g08810-T|Afu2g03700-T|Afu5g13840-T|Afu8g05320-T|Afu3g14440-T|Afu2g11940-T|Afu6g05320-T|Afu2g10855-T|Afu5g03960-T|Afu1g06960-T|Afu1g15820-T|Afu5g10550-T|Afu3g11070-T|Afu8g02770-T|Afu1g14140-T|Afu5g06390-T|Afu6g07430-T|Afu4g09360-T|Afu7g02310-T|Afu2g11780-T|Afu7g04190-T|Afu3g0764…	http://amigo.geneontology.org/cgi-bin/amigo/term_details?term=GO:1901135
N',N'',N'''-triacetylfusarinine C metabolic process	Gene Ontology	GO:1900549	5	7	0.0165235	Afu2g03700-T|Afu3g03410-T|Afu1g17190-T|Afu3g03420-T|Afu3g03400-T	http://amigo.geneontology.org/cgi-bin/amigo/term_details?term=GO:1900549
N',N'',N'''-triacetylfusarinine C biosynthetic process	Gene Ontology	GO:1900551	5	7	0.0165235	Afu2g03700-T|Afu3g03410-T|Afu1g17190-T|Afu3g03420-T|Afu3g03400-T	http://amigo.geneontology.org/cgi-bin/amigo/term_details?term=GO:1900551
ribonucleoside monophosphate biosynthetic process	Gene Ontology	GO:0009156	12	34	0.0185594	Afu3g07640-T|Afu2g10855-T|Afu1g16280-T|Afu2g11940-T|Afu5g10550-T|Afu1g07530-T|Afu6g11620-T|Afu1g15450-T|Afu2g08360-T|Afu8g05320-T|Afu7g02310-T|Afu4g09360-T	http://amigo.geneontology.org/cgi-bin/amigo/term_details?term=GO:0009156
modification by symbiont of host morphology or physiology	Gene Ontology	GO:0044003	8	18	0.0194633	Afu4g02805-T|Afu6g12930-T|Afu4g07360-T|Afu3g11690-T|Afu8g03930-T|Afu2g03610-T|Afu6g07430-T|Afu5g01970-T	http://amigo.geneontology.org/cgi-bin/amigo/term_details?term=GO:0044003
modification of morphology or physiology of other organism involved in symbiotic interaction	Gene Ontology	GO:0051817	8	18	0.0194633	Afu4g02805-T|Afu6g12930-T|Afu4g07360-T|Afu3g11690-T|Afu8g03930-T|Afu2g03610-T|Afu6g07430-T|Afu5g01970-T	http://amigo.geneontology.org/cgi-bin/amigo/term_details?term=GO:0051817
modification of morphology or physiology of other organism	Gene Ontology	GO:0035821	8	18	0.0194633	Afu4g02805-T|Afu6g12930-T|Afu4g07360-T|Afu3g11690-T|Afu8g03930-T|Afu2g03610-T|Afu6g07430-T|Afu5g01970-T	http://amigo.geneontology.org/cgi-bin/amigo/term_details?term=GO:0035821
carbon utilization	Gene Ontology	GO:0015976	8	18	0.0194633	Afu4g11310-T|Afu1g06960-T|Afu6g03540-T|Afu2g16930-T|Afu6g07720-T|Afu4g07710-T|Afu2g11780-T|Afu4g13510-T	http://amigo.geneontology.org/cgi-bin/amigo/term_details?term=GO:0015976
nonribosomal peptide biosynthetic process	Gene Ontology	GO:0019184	9	22	0.0199188	Afu6g12080-T|Afu1g17200-T|Afu2g07680-T|Afu3g03400-T|Afu3g03420-T|Afu1g17190-T|Afu8g00540-T|Afu8g00170-T|Afu6g12050-T	http://amigo.geneontology.org/cgi-bin/amigo/term_details?term=GO:0019184
monodictyphenone biosynthetic process	Gene Ontology	GO:1900815	9	22	0.0199188	Afu8g00370-T|Afu4g00210-T|Afu2g17580-T|Afu5g10310-T|Afu2g01290-T|Afu4g00220-T|Afu1g03195-T|Afu7g00160-T|Afu6g12060-T	http://amigo.geneontology.org/cgi-bin/amigo/term_details?term=GO:1900815
monodictyphenone metabolic process	Gene Ontology	GO:1900813	9	22	0.0199188	Afu8g00370-T|Afu4g00210-T|Afu2g17580-T|Afu5g10310-T|Afu2g01290-T|Afu4g00220-T|Afu1g03195-T|Afu7g00160-T|Afu6g12060-T	http://amigo.geneontology.org/cgi-bin/amigo/term_details?term=GO:1900813
response to oxidative stress	Gene Ontology	GO:0006979	26	100	0.0200253	Afu8g06080-T|Afu3g12120-T|Afu5g11820-T|Afu3g03410-T|Afu2g07680-T|Afu1g17360-T|Afu3g01790-T|Afu2g15650-T|Afu2g10660-T|Afu1g17200-T|Afu3g14970-T|Afu2g15130-T|Afu1g04540-T|Afu6g13490-T|Afu3g12270-T|Afu3g06180-T|Afu5g03490-T|Afu2g18030-T|Afu2g03490-T|Afu2g05060-T|Afu2g01700-T|Afu1g17190-T|Afu1g12940-T|Afu3g02270-T|Afu6g12180-T|Afu1g05390-T	http://amigo.geneontology.org/cgi-bin/amigo/term_details?term=GO:0006979
steroid metabolic process	Gene Ontology	GO:0008202	15	48	0.0209823	Afu1g17190-T|Afu2g11550-T|Afu3g03410-T|Afu4g07130-T|Afu3g03400-T|Afu2g03700-T|Afu2g07680-T|Afu5g07780-T|Afu8g02590-T|Afu2g04290-T|Afu4g11500-T|Afu3g03420-T|Afu4g03630-T|Afu1g04540-T|Afu7g03740-T	http://amigo.geneontology.org/cgi-bin/amigo/term_details?term=GO:0008202
purine nucleoside monophosphate biosynthetic process	Gene Ontology	GO:0009127	11	31	0.0229974	Afu3g07640-T|Afu2g10855-T|Afu1g16280-T|Afu2g11940-T|Afu5g10550-T|Afu1g07530-T|Afu6g11620-T|Afu1g15450-T|Afu8g05320-T|Afu7g02310-T|Afu4g09360-T	http://amigo.geneontology.org/cgi-bin/amigo/term_details?term=GO:0009127
purine ribonucleoside monophosphate biosynthetic process	Gene Ontology	GO:0009168	11	31	0.0229974	Afu3g07640-T|Afu2g10855-T|Afu1g16280-T|Afu2g11940-T|Afu5g10550-T|Afu1g07530-T|Afu6g11620-T|Afu1g15450-T|Afu8g05320-T|Afu7g02310-T|Afu4g09360-T	http://amigo.geneontology.org/cgi-bin/amigo/term_details?term=GO:0009168
acetyl-CoA metabolic process	Gene Ontology	GO:0006084	7	15	0.0235057	Afu1g06960-T|Afu8g05580-T|Afu7g05720-T|Afu4g07130-T|Afu2g03700-T|Afu5g04230-T|Afu3g04170-T	http://amigo.geneontology.org/cgi-bin/amigo/term_details?term=GO:0006084
response to hydrogen peroxide	Gene Ontology	GO:0042542	7	15	0.0235057	Afu1g17190-T|Afu1g12940-T|Afu3g03410-T|Afu3g02270-T|Afu3g12270-T|Afu1g17360-T|Afu6g12180-T	http://amigo.geneontology.org/cgi-bin/amigo/term_details?term=GO:0042542
diol metabolic process	Gene Ontology	GO:0034311	7	15	0.0235057	Afu1g16850-T|Afu8g00370-T|Afu8g00230-T|Afu8g00910-T|Afu2g01290-T|Afu6g12070-T|Afu8g00200-T	http://amigo.geneontology.org/cgi-bin/amigo/term_details?term=GO:0034311
ribosomal small subunit assembly	Gene Ontology	GO:0000028	5	8	0.0238749	Afu7g04490-T|Afu3g13320-T|Afu2g10440-T|Afu3g11260-T|Afu3g06640-T	http://amigo.geneontology.org/cgi-bin/amigo/term_details?term=GO:0000028
nucleoside monophosphate biosynthetic process	Gene Ontology	GO:0009124	12	36	0.0256793	Afu3g07640-T|Afu2g10855-T|Afu1g16280-T|Afu2g11940-T|Afu5g10550-T|Afu1g07530-T|Afu6g11620-T|Afu1g15450-T|Afu2g08360-T|Afu8g05320-T|Afu7g02310-T|Afu4g09360-T	http://amigo.geneontology.org/cgi-bin/amigo/term_details?term=GO:0009124
ribosome biogenesis	Gene Ontology	GO:0042254	34	144	0.0265767	Afu2g06310-T|Afu4g07730-T|Afu7g02140-T|Afu1g05340-T|Afu5g05450-T|Afu2g10440-T|Afu2g09210-T|Afu2g03590-T|Afu5g05710-T|Afu2g10090-T|Afu3g06640-T|Afu2g13130-T|Afu1g11130-T|Afu1g04320-T|Afu8g03930-T|Afu7g04490-T|Afu6g12660-T|Afu1g09440-T|Afu2g10500-T|Afu1g16730-T|Afu1g05630-T|Afu1g05080-T|Afu1g14220-T|Afu3g11260-T|Afu2g02150-T|Afu2g09200-T|Afu3g10730-T|Afu1g04040-T|Afu1g06770-T|Afu3g13320-T|Afu7g0146…	http://amigo.geneontology.org/cgi-bin/amigo/term_details?term=GO:0042254
maturation of SSU-rRNA	Gene Ontology	GO:0030490	13	41	0.027893	Afu2g03590-T|Afu2g02150-T|Afu3g06640-T|Afu7g02140-T|Afu1g09440-T|Afu1g04320-T|Afu2g10500-T|Afu7g04490-T|Afu3g13320-T|Afu5g05450-T|Afu4g10800-T|Afu3g11260-T|Afu2g10440-T	http://amigo.geneontology.org/cgi-bin/amigo/term_details?term=GO:0030490
purine nucleotide biosynthetic process	Gene Ontology	GO:0006164	13	41	0.027893	Afu3g07640-T|Afu2g10855-T|Afu1g16280-T|Afu2g11940-T|Afu5g10550-T|Afu5g03490-T|Afu1g07530-T|Afu6g11620-T|Afu2g03610-T|Afu1g15450-T|Afu8g05320-T|Afu7g02310-T|Afu4g09360-T	http://amigo.geneontology.org/cgi-bin/amigo/term_details?term=GO:0006164
lipid metabolic process	Gene Ontology	GO:0006629	56	263	0.0288871	Afu1g16850-T|Afu3g06120-T|Afu3g12120-T|Afu7g05580-T|Afu8g05580-T|Afu2g14040-T|Afu3g03410-T|Afu4g07130-T|Afu2g03700-T|Afu2g15580-T|Afu7g05920-T|Afu8g02590-T|Afu8g06750-T|Afu6g13990-T|Afu7g05350-T|Afu5g09970-T|Afu8g02440-T|Afu2g11550-T|Afu7g04950-T|Afu6g00260-T|Afu6g04290-T|Afu5g01590-T|Afu1g14140-T|Afu3g03400-T|Afu3g09960-T|Afu8g07120-T|Afu2g04290-T|Afu4g11500-T|Afu8g07210-T|Afu1g11600-T|Afu4g0363…	http://amigo.geneontology.org/cgi-bin/amigo/term_details?term=GO:0006629
response to host	Gene Ontology	GO:0075136	9	24	0.0296396	Afu2g17600-T|Afu6g12930-T|Afu4g07360-T|Afu6g10410-T|Afu3g11690-T|Afu8g03930-T|Afu2g03610-T|Afu6g07430-T|Afu5g01970-T	http://amigo.geneontology.org/cgi-bin/amigo/term_details?term=GO:0075136
sterigmatocystin biosynthetic process	Gene Ontology	GO:0045461	14	46	0.0296977	Afu8g06080-T|Afu3g12120-T|Afu4g00210-T|Afu6g13790-T|Afu5g10310-T|Afu3g08010-T|Afu8g00370-T|Afu4g03410-T|Afu2g01290-T|Afu7g00290-T|Afu6g12180-T|Afu5g13840-T|Afu7g00160-T|Afu1g03195-T	http://amigo.geneontology.org/cgi-bin/amigo/term_details?term=GO:0045461
sterigmatocystin metabolic process	Gene Ontology	GO:0045460	14	46	0.0296977	Afu8g06080-T|Afu3g12120-T|Afu4g00210-T|Afu6g13790-T|Afu5g10310-T|Afu3g08010-T|Afu8g00370-T|Afu4g03410-T|Afu2g01290-T|Afu7g00290-T|Afu6g12180-T|Afu5g13840-T|Afu7g00160-T|Afu1g03195-T	http://amigo.geneontology.org/cgi-bin/amigo/term_details?term=GO:0045460
regulation of defense response	Gene Ontology	GO:0031347	7	16	0.0299011	Afu6g12930-T|Afu4g07360-T|Afu3g11690-T|Afu8g03930-T|Afu2g03610-T|Afu6g07430-T|Afu5g01970-T	http://amigo.geneontology.org/cgi-bin/amigo/term_details?term=GO:0031347
modulation by organism of defense response of other organism involved in symbiotic interaction	Gene Ontology	GO:0052255	7	16	0.0299011	Afu6g12930-T|Afu4g07360-T|Afu3g11690-T|Afu8g03930-T|Afu2g03610-T|Afu6g07430-T|Afu5g01970-T	http://amigo.geneontology.org/cgi-bin/amigo/term_details?term=GO:0052255
modulation by symbiont of host defense response	Gene Ontology	GO:0052031	7	16	0.0299011	Afu6g12930-T|Afu4g07360-T|Afu3g11690-T|Afu8g03930-T|Afu2g03610-T|Afu6g07430-T|Afu5g01970-T	http://amigo.geneontology.org/cgi-bin/amigo/term_details?term=GO:0052031
regulation of translation	Gene Ontology	GO:0006417	12	37	0.0299051	Afu1g05200-T|Afu2g01700-T|Afu7g01460-T|Afu1g12940-T|Afu1g09440-T|Afu8g03930-T|Afu6g13250-T|Afu5g02330-T|Afu2g15980-T|Afu2g13530-T|Afu4g13170-T|Afu1g11190-T	http://amigo.geneontology.org/cgi-bin/amigo/term_details?term=GO:0006417
ergot alkaloid metabolic process	Gene Ontology	GO:0035836	5	9	0.0330409	Afu6g13990-T|Afu2g18050-T|Afu2g18030-T|Afu6g12050-T|Afu2g17960-T	http://amigo.geneontology.org/cgi-bin/amigo/term_details?term=GO:0035836
terpenoid indole alkaloid biosynthetic process	Gene Ontology	GO:0009709	5	9	0.0330409	Afu6g13990-T|Afu2g18050-T|Afu2g18030-T|Afu6g12050-T|Afu2g17960-T	http://amigo.geneontology.org/cgi-bin/amigo/term_details?term=GO:0009709
ATP synthesis coupled electron transport	Gene Ontology	GO:0042773	5	9	0.0330409	Afu3g07810-T|Afu5g10560-T|Afu2g03010-T|Afu3g14440-T|Afu4g06790-T	http://amigo.geneontology.org/cgi-bin/amigo/term_details?term=GO:0042773
gluconeogenesis	Gene Ontology	GO:0006094	5	9	0.0330409	Afu4g07710-T|Afu4g11310-T|Afu3g11690-T|Afu2g01700-T|Afu6g07720-T	http://amigo.geneontology.org/cgi-bin/amigo/term_details?term=GO:0006094
terpenoid indole alkaloid metabolic process	Gene Ontology	GO:0046447	5	9	0.0330409	Afu6g13990-T|Afu2g18050-T|Afu2g18030-T|Afu6g12050-T|Afu2g17960-T	http://amigo.geneontology.org/cgi-bin/amigo/term_details?term=GO:0046447
mitochondrial ATP synthesis coupled electron transport	Gene Ontology	GO:0042775	5	9	0.0330409	Afu3g07810-T|Afu5g10560-T|Afu2g03010-T|Afu3g14440-T|Afu4g06790-T	http://amigo.geneontology.org/cgi-bin/amigo/term_details?term=GO:0042775
ergot alkaloid biosynthetic process	Gene Ontology	GO:0035837	5	9	0.0330409	Afu6g13990-T|Afu2g18050-T|Afu2g18030-T|Afu6g12050-T|Afu2g17960-T	http://amigo.geneontology.org/cgi-bin/amigo/term_details?term=GO:0035837
oxidative phosphorylation	Gene Ontology	GO:0006119	5	9	0.0330409	Afu3g07810-T|Afu5g10560-T|Afu2g03010-T|Afu3g14440-T|Afu4g06790-T	http://amigo.geneontology.org/cgi-bin/amigo/term_details?term=GO:0006119
cellular metabolic process	Gene Ontology	GO:0044237	383	2202	0.0340829	Afu2g06310-T|Afu8g06080-T|Afu8g02770-T|Afu8g05460-T|Afu1g08810-T|Afu6g07770-T|Afu2g16370-T|Afu2g09650-T|Afu4g07845-T|Afu8g00490-T|Afu4g12930-T|Afu1g03110-T|Afu4g13170-T|Afu6g08590-T|Afu4g08110-T|Afu4g08410-T|Afu7g05800-T|Afu4g03410-T|Afu8g04050-T|Afu1g04040-T|Afu1g15620-T|Afu1g01600-T|Afu4g10160-T|Afu2g03700-T|Afu5g09450-T|Afu5g03960-T|Afu3g08010-T|Afu3g02000-T|Afu4g10330-T|Afu1g15780-T|Afu4g0981…	http://amigo.geneontology.org/cgi-bin/amigo/term_details?term=GO:0044237
response to external biotic stimulus	Gene Ontology	GO:0043207	9	25	0.0355673	Afu2g17600-T|Afu6g12930-T|Afu4g07360-T|Afu6g10410-T|Afu3g11690-T|Afu8g03930-T|Afu2g03610-T|Afu6g07430-T|Afu5g01970-T	http://amigo.geneontology.org/cgi-bin/amigo/term_details?term=GO:0043207
response to other organism	Gene Ontology	GO:0051707	9	25	0.0355673	Afu2g17600-T|Afu6g12930-T|Afu4g07360-T|Afu6g10410-T|Afu3g11690-T|Afu8g03930-T|Afu2g03610-T|Afu6g07430-T|Afu5g01970-T	http://amigo.geneontology.org/cgi-bin/amigo/term_details?term=GO:0051707
response to reactive oxygen species	Gene Ontology	GO:0000302	9	25	0.0355673	Afu1g17190-T|Afu3g06180-T|Afu1g12940-T|Afu3g03410-T|Afu3g14970-T|Afu3g02270-T|Afu3g12270-T|Afu1g17360-T|Afu6g12180-T	http://amigo.geneontology.org/cgi-bin/amigo/term_details?term=GO:0000302
RNA export from nucleus	Gene Ontology	GO:0006405	9	25	0.0355673	Afu2g10090-T|Afu1g12940-T|Afu7g04490-T|Afu1g05340-T|Afu3g13320-T|Afu1g05630-T|Afu7g01460-T|Afu1g06770-T|Afu6g12660-T	http://amigo.geneontology.org/cgi-bin/amigo/term_details?term=GO:0006405
asperthecin biosynthetic process	Gene Ontology	GO:0036184	6	13	0.0364707	Afu4g00210-T|Afu6g00660-T|Afu5g10310-T|Afu4g00220-T|Afu7g00160-T|Afu1g03195-T	http://amigo.geneontology.org/cgi-bin/amigo/term_details?term=GO:0036184
ribosome assembly	Gene Ontology	GO:0042255	11	34	0.0371924	Afu2g09210-T|Afu4g07730-T|Afu3g06640-T|Afu1g11130-T|Afu1g04040-T|Afu7g04490-T|Afu3g13320-T|Afu1g05080-T|Afu2g11850-T|Afu3g11260-T|Afu2g10440-T	http://amigo.geneontology.org/cgi-bin/amigo/term_details?term=GO:0042255
polyol metabolic process	Gene Ontology	GO:0019751	11	34	0.0371924	Afu1g16850-T|Afu4g11310-T|Afu8g00230-T|Afu8g00370-T|Afu2g01290-T|Afu4g11730-T|Afu8g00910-T|Afu6g12070-T|Afu8g00200-T|Afu2g10660-T|Afu8g02000-T	http://amigo.geneontology.org/cgi-bin/amigo/term_details?term=GO:0019751
regulation of translational fidelity	Gene Ontology	GO:0006450	4	6	0.0372427	Afu1g09440-T|Afu8g03930-T|Afu7g01460-T|Afu6g13250-T	http://amigo.geneontology.org/cgi-bin/amigo/term_details?term=GO:0006450
nucleoside catabolic process	Gene Ontology	GO:0009164	4	6	0.0372427	Afu6g05320-T|Afu1g10130-T|Afu2g02120-T|Afu8g02770-T	http://amigo.geneontology.org/cgi-bin/amigo/term_details?term=GO:0009164
ribonucleoside catabolic process	Gene Ontology	GO:0042454	4	6	0.0372427	Afu6g05320-T|Afu1g10130-T|Afu2g02120-T|Afu8g02770-T	http://amigo.geneontology.org/cgi-bin/amigo/term_details?term=GO:0042454
acyl-CoA metabolic process	Gene Ontology	GO:0006637	7	17	0.0373705	Afu1g06960-T|Afu8g05580-T|Afu7g05720-T|Afu4g07130-T|Afu2g03700-T|Afu5g04230-T|Afu3g04170-T	http://amigo.geneontology.org/cgi-bin/amigo/term_details?term=GO:0006637
thioester metabolic process	Gene Ontology	GO:0035383	7	17	0.0373705	Afu1g06960-T|Afu8g05580-T|Afu7g05720-T|Afu4g07130-T|Afu2g03700-T|Afu5g04230-T|Afu3g04170-T	http://amigo.geneontology.org/cgi-bin/amigo/term_details?term=GO:0035383
polyol biosynthetic process	Gene Ontology	GO:0046173	7	17	0.0373705	Afu8g00370-T|Afu8g00230-T|Afu8g00910-T|Afu2g01290-T|Afu6g12070-T|Afu8g00200-T|Afu2g10660-T	http://amigo.geneontology.org/cgi-bin/amigo/term_details?term=GO:0046173
nucleotide biosynthetic process	Gene Ontology	GO:0009165	18	67	0.0376494	Afu6g05320-T|Afu2g10855-T|Afu1g16280-T|Afu8g04650-T|Afu5g10550-T|Afu5g03490-T|Afu1g07530-T|Afu8g00850-T|Afu6g11620-T|Afu3g07640-T|Afu2g03610-T|Afu1g15450-T|Afu4g09360-T|Afu2g08360-T|Afu8g05320-T|Afu7g02310-T|Afu5g03460-T|Afu2g11940-T	http://amigo.geneontology.org/cgi-bin/amigo/term_details?term=GO:0009165
carboxylic acid metabolic process	Gene Ontology	GO:0019752	59	285	0.0384219	Afu1g16850-T|Afu3g12120-T|Afu6g07770-T|Afu8g05580-T|Afu2g11300-T|Afu4g07360-T|Afu3g08660-T|Afu3g11690-T|Afu3g09320-T|Afu1g07380-T|Afu2g15650-T|Afu5g04250-T|Afu3g11120-T|Afu8g00100-T|Afu7g05350-T|Afu5g09450-T|Afu5g09970-T|Afu2g09110-T|Afu1g06960-T|Afu8g02440-T|Afu2g08280-T|Afu1g16210-T|Afu3g11070-T|Afu3g14970-T|Afu6g02230-T|Afu2g07620-T|Afu6g07430-T|Afu4g13170-T|Afu2g12470-T|Afu6g13490-T|Afu1g0257…	http://amigo.geneontology.org/cgi-bin/amigo/term_details?term=GO:0019752
nitrogen compound transport	Gene Ontology	GO:0071705	25	103	0.0408682	Afu5g02940-T|Afu5g02790-T|Afu4g06230-T|Afu3g11690-T|Afu1g05340-T|Afu5g01510-T|Afu3g03440-T|Afu2g10090-T|Afu8g05860-T|Afu1g05390-T|Afu1g07450-T|Afu7g04490-T|Afu2g15130-T|Afu2g04080-T|Afu6g12660-T|Afu1g05630-T|Afu4g03370-T|Afu4g00230-T|Afu2g15370-T|Afu1g12940-T|Afu2g15140-T|Afu7g01490-T|Afu1g06770-T|Afu3g13320-T|Afu7g01460-T	http://amigo.geneontology.org/cgi-bin/amigo/term_details?term=GO:0071705
ribonucleotide biosynthetic process	Gene Ontology	GO:0009260	13	44	0.0418477	Afu3g07640-T|Afu2g10855-T|Afu1g16280-T|Afu2g11940-T|Afu5g10550-T|Afu5g03490-T|Afu1g07530-T|Afu6g11620-T|Afu1g15450-T|Afu2g08360-T|Afu8g05320-T|Afu7g02310-T|Afu4g09360-T	http://amigo.geneontology.org/cgi-bin/amigo/term_details?term=GO:0009260
hexose biosynthetic process	Gene Ontology	GO:0019319	5	10	0.0441175	Afu4g07710-T|Afu4g11310-T|Afu3g11690-T|Afu2g01700-T|Afu6g07720-T	http://amigo.geneontology.org/cgi-bin/amigo/term_details?term=GO:0019319
shamixanthone metabolic process	Gene Ontology	GO:1900791	5	10	0.0441175	Afu3g12930-T|Afu8g00620-T|Afu7g00160-T|Afu8g00250-T|Afu4g00210-T	http://amigo.geneontology.org/cgi-bin/amigo/term_details?term=GO:1900791
monosaccharide biosynthetic process	Gene Ontology	GO:0046364	5	10	0.0441175	Afu4g07710-T|Afu4g11310-T|Afu3g11690-T|Afu2g01700-T|Afu6g07720-T	http://amigo.geneontology.org/cgi-bin/amigo/term_details?term=GO:0046364
regulation of translational elongation	Gene Ontology	GO:0006448	5	10	0.0441175	Afu1g09440-T|Afu7g01460-T|Afu8g03930-T|Afu2g13530-T|Afu6g13250-T	http://amigo.geneontology.org/cgi-bin/amigo/term_details?term=GO:0006448
shamixanthone biosynthetic process	Gene Ontology	GO:1900793	5	10	0.0441175	Afu3g12930-T|Afu8g00620-T|Afu7g00160-T|Afu8g00250-T|Afu4g00210-T	http://amigo.geneontology.org/cgi-bin/amigo/term_details?term=GO:1900793
sulfur compound metabolic process	Gene Ontology	GO:0006790	23	94	0.0453349	Afu3g12120-T|Afu8g05580-T|Afu2g03700-T|Afu6g08920-T|Afu2g15650-T|Afu5g04250-T|Afu1g06960-T|Afu3g14970-T|Afu6g08360-T|Afu4g07130-T|Afu2g07620-T|Afu5g02470-T|Afu7g05720-T|Afu6g09740-T|Afu7g04760-T|Afu1g10130-T|Afu3g07960-T|Afu5g13840-T|Afu6g07530-T|Afu2g17300-T|Afu1g10630-T|Afu5g04230-T|Afu3g04170-T	http://amigo.geneontology.org/cgi-bin/amigo/term_details?term=GO:0006790
purine ribonucleotide biosynthetic process	Gene Ontology	GO:0009152	12	40	0.0455497	Afu3g07640-T|Afu2g10855-T|Afu1g16280-T|Afu2g11940-T|Afu5g10550-T|Afu5g03490-T|Afu1g07530-T|Afu6g11620-T|Afu1g15450-T|Afu8g05320-T|Afu7g02310-T|Afu4g09360-T	http://amigo.geneontology.org/cgi-bin/amigo/term_details?term=GO:0009152
tetrapyrrole biosynthetic process	Gene Ontology	GO:0033014	6	14	0.0462469	Afu1g07480-T|Afu6g08440-T|Afu5g11760-T|Afu3g13120-T|Afu6g07670-T|Afu1g05060-T	http://amigo.geneontology.org/cgi-bin/amigo/term_details?term=GO:0033014
cellular response to hydrogen peroxide	Gene Ontology	GO:0070301	6	14	0.0462469	Afu1g17190-T|Afu3g03410-T|Afu3g02270-T|Afu3g12270-T|Afu1g17360-T|Afu6g12180-T	http://amigo.geneontology.org/cgi-bin/amigo/term_details?term=GO:0070301
asperthecin metabolic process	Gene Ontology	GO:0036182	6	14	0.0462469	Afu4g00210-T|Afu6g00660-T|Afu5g10310-T|Afu4g00220-T|Afu7g00160-T|Afu1g03195-T	http://amigo.geneontology.org/cgi-bin/amigo/term_details?term=GO:0036182
tetrapyrrole metabolic process	Gene Ontology	GO:0033013	6	14	0.0462469	Afu1g07480-T|Afu6g08440-T|Afu5g11760-T|Afu3g13120-T|Afu6g07670-T|Afu1g05060-T	http://amigo.geneontology.org/cgi-bin/amigo/term_details?term=GO:0033013
diol biosynthetic process	Gene Ontology	GO:0034312	6	14	0.0462469	Afu8g00370-T|Afu8g00230-T|Afu8g00910-T|Afu2g01290-T|Afu6g12070-T|Afu8g00200-T	http://amigo.geneontology.org/cgi-bin/amigo/term_details?term=GO:0034312
interaction with host	Gene Ontology	GO:0051701	10	31	0.0463889	Afu4g02805-T|Afu2g17600-T|Afu6g12930-T|Afu4g07360-T|Afu6g10410-T|Afu3g11690-T|Afu8g03930-T|Afu2g03610-T|Afu6g07430-T|Afu5g01970-T	http://amigo.geneontology.org/cgi-bin/amigo/term_details?term=GO:0051701
oxoacid metabolic process	Gene Ontology	GO:0043436	60	295	0.0475863	Afu1g16850-T|Afu3g12120-T|Afu6g07770-T|Afu8g05580-T|Afu2g11300-T|Afu4g07360-T|Afu3g08660-T|Afu3g11690-T|Afu3g09320-T|Afu1g07380-T|Afu2g15650-T|Afu5g04250-T|Afu3g11120-T|Afu8g00100-T|Afu7g05350-T|Afu5g09450-T|Afu5g09970-T|Afu2g09110-T|Afu1g06960-T|Afu8g02440-T|Afu2g08280-T|Afu1g16210-T|Afu3g11070-T|Afu3g14970-T|Afu6g02230-T|Afu2g07620-T|Afu6g07430-T|Afu4g13170-T|Afu2g12470-T|Afu6g13490-T|Afu1g0257…	http://amigo.geneontology.org/cgi-bin/amigo/term_details?term=GO:0043436
ribosomal small subunit biogenesis	Gene Ontology	GO:0042274	14	50	0.0488046	Afu2g03590-T|Afu2g02150-T|Afu3g06640-T|Afu7g02140-T|Afu1g09440-T|Afu1g04320-T|Afu2g10500-T|Afu7g04490-T|Afu1g05340-T|Afu3g13320-T|Afu5g05450-T|Afu4g10800-T|Afu3g11260-T|Afu2g10440-T	http://amigo.geneontology.org/cgi-bin/amigo/term_details?term=GO:0042274
maturation of SSU-rRNA from tricistronic rRNA transcript (SSU-rRNA, 5.8S rRNA, LSU-rRNA)	Gene Ontology	GO:0000462	11	36	0.0495086	Afu2g03590-T|Afu2g02150-T|Afu3g06640-T|Afu7g02140-T|Afu1g09440-T|Afu1g04320-T|Afu2g10500-T|Afu3g13320-T|Afu5g05450-T|Afu4g10800-T|Afu2g10440-T	http://amigo.geneontology.org/cgi-bin/amigo/term_details?term=GO:0000462
chromatin assembly	Gene Ontology	GO:0031497	9	27	0.0497481	Afu2g14720-T|Afu3g06070-T|Afu1g12940-T|Afu3g11010-T|Afu1g13790-T|Afu5g02910-T|Afu3g05350-T|Afu1g13780-T|Afu2g11780-T	http://amigo.geneontology.org/cgi-bin/amigo/term_details?term=GO:0031497

## Sheet: GO up xylP HS 15' vs xylP 30ºC
	Database	ID	Input number	Background number	P-Value	Input	Hyperlink
single-organism catabolic process	Gene Ontology	GO:0044712	52	192	5.02e-05	Afu5g08940-T|Afu8g02700-T|Afu6g04040-T|Afu5g08910-T|Afu4g08170-T|Afu6g10260-T|Afu2g10520-T|Afu6g11430-T|Afu3g11430-T|Afu5g07510-T|Afu1g14850-T|Afu2g10900-T|Afu5g07040-T|Afu4g09140-T|Afu1g11630-T|Afu2g04210-T|Afu3g11830-T|Afu4g03900-T|Afu2g04230-T|Afu2g04220-T|Afu1g15520-T|Afu5g09860-T|Afu8g02000-T|Afu2g09150-T|Afu2g10230-T|Afu2g11700-T|Afu1g05570-T|Afu1g02780-T|Afu2g04620-T|Afu2g02250-T|Afu2g1197…	http://amigo.geneontology.org/cgi-bin/amigo/term_details?term=GO:0044712
cellular amino acid catabolic process	Gene Ontology	GO:0009063	17	35	0.000105225	Afu5g08940-T|Afu1g05570-T|Afu4g09140-T|Afu8g06470-T|Afu5g08910-T|Afu4g08170-T|Afu2g04230-T|Afu3g08050-T|Afu1g02780-T|Afu2g10920-T|Afu6g11430-T|Afu2g04220-T|Afu6g08760-T|Afu3g11430-T|Afu5g07510-T|Afu2g04240-T|Afu5g06680-T	http://amigo.geneontology.org/cgi-bin/amigo/term_details?term=GO:0009063
organonitrogen compound catabolic process	Gene Ontology	GO:1901565	29	91	0.000255993	Afu5g08940-T|Afu5g08910-T|Afu2g10520-T|Afu6g11430-T|Afu3g11430-T|Afu5g07510-T|Afu4g09140-T|Afu2g04210-T|Afu4g08170-T|Afu7g05140-T|Afu2g04230-T|Afu2g04220-T|Afu1g15520-T|Afu2g09150-T|Afu2g11700-T|Afu1g05570-T|Afu2g02250-T|Afu3g12560-T|Afu2g10920-T|Afu4g11220-T|Afu6g08760-T|Afu2g04240-T|Afu2g04200-T|Afu8g06470-T|Afu3g08050-T|Afu3g11340-T|Afu4g08990-T|Afu1g02780-T|Afu5g06680-T	http://amigo.geneontology.org/cgi-bin/amigo/term_details?term=GO:1901565
small molecule catabolic process	Gene Ontology	GO:0044282	33	113	0.000377688	Afu5g08940-T|Afu8g02700-T|Afu6g04040-T|Afu5g08910-T|Afu3g11830-T|Afu6g10260-T|Afu6g11430-T|Afu3g11430-T|Afu5g07510-T|Afu1g14850-T|Afu4g09140-T|Afu1g11630-T|Afu2g04210-T|Afu4g08170-T|Afu4g03900-T|Afu2g04230-T|Afu2g04220-T|Afu1g15520-T|Afu5g09860-T|Afu8g02000-T|Afu2g10230-T|Afu1g05570-T|Afu1g02780-T|Afu2g10920-T|Afu6g08760-T|Afu2g04240-T|Afu2g04200-T|Afu2g12530-T|Afu8g06470-T|Afu5g01710-T|Afu3g0805…	http://amigo.geneontology.org/cgi-bin/amigo/term_details?term=GO:0044282
cellular catabolic process	Gene Ontology	GO:0044248	74	342	0.000705552	Afu5g08940-T|Afu8g02700-T|Afu6g04750-T|Afu6g04040-T|Afu5g08910-T|Afu1g15420-T|Afu2g10520-T|Afu2g14110-T|Afu6g11430-T|Afu1g12080-T|Afu3g11430-T|Afu5g07510-T|Afu1g14850-T|Afu2g10900-T|Afu5g07040-T|Afu3g08050-T|Afu4g09140-T|Afu1g03860-T|Afu2g04230-T|Afu1g11630-T|Afu2g04210-T|Afu4g08170-T|Afu4g03900-T|Afu7g01320-T|Afu6g08000-T|Afu2g04220-T|Afu1g15520-T|Afu5g09860-T|Afu8g02000-T|Afu2g09150-T|Afu2g1023…	http://amigo.geneontology.org/cgi-bin/amigo/term_details?term=GO:0044248
carboxylic acid catabolic process	Gene Ontology	GO:0046395	24	78	0.00125786	Afu5g08940-T|Afu8g02700-T|Afu6g04040-T|Afu5g08910-T|Afu6g11430-T|Afu3g11430-T|Afu5g07510-T|Afu1g14850-T|Afu4g09140-T|Afu1g11630-T|Afu4g08170-T|Afu4g03900-T|Afu2g04230-T|Afu2g04220-T|Afu1g05570-T|Afu2g10920-T|Afu6g08760-T|Afu2g04240-T|Afu2g12530-T|Afu8g06470-T|Afu5g01710-T|Afu3g08050-T|Afu1g02780-T|Afu5g06680-T	http://amigo.geneontology.org/cgi-bin/amigo/term_details?term=GO:0046395
cellular response to stimulus	Gene Ontology	GO:0051716	130	690	0.00134767	Afu4g03840-T|Afu8g05630-T|Afu5g10270-T|Afu2g07590-T|Afu4g11140-T|Afu4g12990-T|Afu5g09100-T|Afu5g03430-T|Afu2g01170-T|Afu2g17130-T|Afu8g04100-T|Afu3g05650-T|Afu7g01280-T|Afu7g02200-T|Afu5g01630-T|Afu1g15440-T|Afu4g04280-T|Afu1g12690-T|Afu2g04620-T|Afu7g05910-T|Afu2g08540-T|Afu2g08780-T|Afu2g03070-T|Afu2g03520-T|Afu2g08840-T|Afu5g02920-T|Afu5g04060-T|Afu1g11170-T|Afu2g15790-T|Afu4g11620-T|Afu5g0931…	http://amigo.geneontology.org/cgi-bin/amigo/term_details?term=GO:0051716
response to stimulus	Gene Ontology	GO:0050896	147	800	0.00160218	Afu4g03840-T|Afu8g05630-T|Afu5g10270-T|Afu2g07590-T|Afu4g11140-T|Afu4g12990-T|Afu5g09100-T|Afu5g03430-T|Afu2g01170-T|Afu2g17130-T|Afu8g04100-T|Afu3g05650-T|Afu7g01280-T|Afu4g04502-T|Afu5g01630-T|Afu1g15440-T|Afu4g04280-T|Afu1g12690-T|Afu7g06570-T|Afu2g17170-T|Afu7g05910-T|Afu2g08540-T|Afu2g17810-T|Afu2g08780-T|Afu2g03070-T|Afu2g03520-T|Afu2g08840-T|Afu5g02920-T|Afu5g04060-T|Afu1g11170-T|Afu2g1579…	http://amigo.geneontology.org/cgi-bin/amigo/term_details?term=GO:0050896
purine nucleobase catabolic process	Gene Ontology	GO:0006145	6	6	0.00168896	Afu4g08990-T|Afu2g02250-T|Afu3g11340-T|Afu4g11220-T|Afu2g10520-T|Afu2g09150-T	http://amigo.geneontology.org/cgi-bin/amigo/term_details?term=GO:0006145
nucleobase catabolic process	Gene Ontology	GO:0046113	6	6	0.00168896	Afu4g08990-T|Afu2g02250-T|Afu3g11340-T|Afu4g11220-T|Afu2g10520-T|Afu2g09150-T	http://amigo.geneontology.org/cgi-bin/amigo/term_details?term=GO:0046113
organic acid catabolic process	Gene Ontology	GO:0016054	26	90	0.00171423	Afu5g08940-T|Afu8g02700-T|Afu6g04040-T|Afu5g08910-T|Afu6g11430-T|Afu3g11430-T|Afu5g07510-T|Afu1g14850-T|Afu4g09140-T|Afu1g11630-T|Afu2g04210-T|Afu4g08170-T|Afu4g03900-T|Afu2g04230-T|Afu2g04220-T|Afu1g05570-T|Afu2g10920-T|Afu6g08760-T|Afu2g04240-T|Afu2g04200-T|Afu2g12530-T|Afu8g06470-T|Afu5g01710-T|Afu3g08050-T|Afu1g02780-T|Afu5g06680-T	http://amigo.geneontology.org/cgi-bin/amigo/term_details?term=GO:0016054
response to stress	Gene Ontology	GO:0006950	92	473	0.00306777	Afu4g03840-T|Afu5g10270-T|Afu4g11140-T|Afu4g12990-T|Afu5g09100-T|Afu2g01170-T|Afu2g17130-T|Afu8g04100-T|Afu3g05650-T|Afu6g14210-T|Afu4g04502-T|Afu5g11260-T|Afu7g06570-T|Afu2g17170-T|Afu2g08540-T|Afu2g17810-T|Afu2g03070-T|Afu2g08840-T|Afu5g04060-T|Afu1g11170-T|Afu4g11620-T|Afu4g06490-T|Afu6g04940-T|Afu1g11640-T|Afu6g10530-T|Afu1g02780-T|Afu1g02480-T|Afu1g05040-T|Afu4g11580-T|Afu5g08410-T|Afu1g0995…	http://amigo.geneontology.org/cgi-bin/amigo/term_details?term=GO:0006950
response to chemical	Gene Ontology	GO:0042221	77	383	0.0031576	Afu2g02710-T|Afu6g04750-T|Afu6g10740-T|Afu5g10270-T|Afu2g07590-T|Afu5g11430-T|Afu5g10480-T|Afu2g10980-T|Afu5g09100-T|Afu7g01280-T|Afu6g11430-T|Afu5g05480-T|Afu5g08480-T|Afu1g09950-T|Afu2g01170-T|Afu2g17130-T|Afu5g07040-T|Afu5g12960-T|Afu1g12310-T|Afu4g04280-T|Afu6g12400-T|Afu1g07470-T|Afu3g08850-T|Afu1g15950-T|Afu3g13970-T|Afu4g08170-T|Afu4g09050-T|Afu3g05650-T|Afu4g12990-T|Afu5g06070-T|Afu6g0436…	http://amigo.geneontology.org/cgi-bin/amigo/term_details?term=GO:0042221
catabolic process	Gene Ontology	GO:0009056	86	439	0.003492	Afu8g02700-T|Afu6g04040-T|Afu1g15420-T|Afu3g08680-T|Afu2g10900-T|Afu7g05140-T|Afu7g01320-T|Afu7g01540-T|Afu8g02000-T|Afu4g04280-T|Afu2g04620-T|Afu6g13420-T|Afu2g04240-T|Afu4g07340-T|Afu2g11740-T|Afu2g04200-T|Afu5g04060-T|Afu8g06470-T|Afu2g00990-T|Afu4g08990-T|Afu6g10530-T|Afu1g02780-T|Afu3g14620-T|Afu3g11430-T|Afu4g03870-T|Afu6g07940-T|Afu2g04210-T|Afu4g08170-T|Afu8g04100-T|Afu5g09860-T|Afu2g0915…	http://amigo.geneontology.org/cgi-bin/amigo/term_details?term=GO:0009056
cellular response to heat	Gene Ontology	GO:0034605	14	39	0.00414652	Afu1g07440-T|Afu5g12960-T|Afu4g13530-T|Afu4g12850-T|Afu5g04170-T|Afu1g10850-T|Afu2g09290-T|Afu1g15950-T|Afu1g05040-T|Afu5g10270-T|Afu3g05650-T|Afu6g04940-T|Afu3g10960-T|Afu4g11330-T	http://amigo.geneontology.org/cgi-bin/amigo/term_details?term=GO:0034605
response to heat	Gene Ontology	GO:0009408	16	49	0.00483522	Afu1g07440-T|Afu5g12960-T|Afu4g13530-T|Afu4g12850-T|Afu5g04170-T|Afu1g10850-T|Afu2g09290-T|Afu1g15950-T|Afu1g05040-T|Afu4g04502-T|Afu3g05650-T|Afu6g04940-T|Afu3g10960-T|Afu1g03040-T|Afu5g10270-T|Afu4g11330-T	http://amigo.geneontology.org/cgi-bin/amigo/term_details?term=GO:0009408
protein modification by small protein conjugation	Gene Ontology	GO:0032446	17	54	0.00506326	Afu5g07040-T|Afu5g12530-T|Afu7g04260-T|Afu2g17110-T|Afu1g05040-T|Afu1g10850-T|Afu2g14110-T|Afu5g12230-T|Afu1g02700-T|Afu2g11040-T|Afu4g06830-T|Afu4g12080-T|Afu4g07340-T|Afu1g12080-T|Afu6g10530-T|Afu5g10480-T|Afu6g14210-T	http://amigo.geneontology.org/cgi-bin/amigo/term_details?term=GO:0032446
cellular response to stress	Gene Ontology	GO:0033554	78	399	0.00550582	Afu4g03840-T|Afu5g08410-T|Afu6g04750-T|Afu3g08520-T|Afu5g10270-T|Afu3g03350-T|Afu5g11430-T|Afu4g11140-T|Afu4g12990-T|Afu5g09100-T|Afu7g01280-T|Afu5g05480-T|Afu1g17270-T|Afu2g17130-T|Afu4g09050-T|Afu5g07040-T|Afu5g12960-T|Afu2g13440-T|Afu3g05650-T|Afu3g14550-T|Afu1g15950-T|Afu1g10850-T|Afu4g08170-T|Afu4g03150-T|Afu1g02700-T|Afu1g07470-T|Afu8g04100-T|Afu5g03450-T|Afu4g12080-T|Afu3g12550-T|Afu7g0220…	http://amigo.geneontology.org/cgi-bin/amigo/term_details?term=GO:0033554
purine-containing compound catabolic process	Gene Ontology	GO:0072523	7	12	0.00571037	Afu2g11700-T|Afu4g08990-T|Afu2g02250-T|Afu3g11340-T|Afu4g11220-T|Afu2g10520-T|Afu2g09150-T	http://amigo.geneontology.org/cgi-bin/amigo/term_details?term=GO:0072523
response to temperature stimulus	Gene Ontology	GO:0009266	18	61	0.00692612	Afu1g07440-T|Afu5g12960-T|Afu4g13530-T|Afu4g12850-T|Afu5g04170-T|Afu1g10850-T|Afu2g09290-T|Afu1g15950-T|Afu1g05040-T|Afu4g04502-T|Afu3g05650-T|Afu6g04940-T|Afu4g12990-T|Afu3g10960-T|Afu1g03040-T|Afu5g10270-T|Afu4g11330-T|Afu2g01170-T	http://amigo.geneontology.org/cgi-bin/amigo/term_details?term=GO:0009266
protein refolding	Gene Ontology	GO:0042026	5	6	0.0069882	Afu2g09290-T|Afu1g15270-T|Afu1g05040-T|Afu1g02170-T|Afu6g10700-T	http://amigo.geneontology.org/cgi-bin/amigo/term_details?term=GO:0042026
peptide transport	Gene Ontology	GO:0015833	7	13	0.00786175	Afu1g07440-T|Afu4g10000-T|Afu2g15240-T|Afu5g07970-T|Afu6g10630-T|Afu5g01630-T|Afu6g14210-T	http://amigo.geneontology.org/cgi-bin/amigo/term_details?term=GO:0015833
alpha-amino acid catabolic process	Gene Ontology	GO:1901606	12	34	0.0085398	Afu2g04200-T|Afu4g09140-T|Afu8g06470-T|Afu2g04210-T|Afu4g08170-T|Afu1g02780-T|Afu2g10920-T|Afu6g11430-T|Afu2g04220-T|Afu6g08760-T|Afu3g11430-T|Afu5g07510-T	http://amigo.geneontology.org/cgi-bin/amigo/term_details?term=GO:1901606
organic substance catabolic process	Gene Ontology	GO:1901575	80	422	0.00953904	Afu5g08940-T|Afu8g02700-T|Afu3g14620-T|Afu1g02780-T|Afu6g04750-T|Afu6g04040-T|Afu5g08910-T|Afu4g08170-T|Afu6g10260-T|Afu3g02090-T|Afu2g10520-T|Afu2g14110-T|Afu3g08680-T|Afu1g12080-T|Afu3g11430-T|Afu5g07510-T|Afu1g14850-T|Afu2g10900-T|Afu5g07040-T|Afu3g08050-T|Afu4g09140-T|Afu8g04100-T|Afu1g11630-T|Afu2g04210-T|Afu3g11830-T|Afu7g05140-T|Afu4g03900-T|Afu7g01320-T|Afu3g00320-T|Afu2g10920-T|Afu7g0154…	http://amigo.geneontology.org/cgi-bin/amigo/term_details?term=GO:1901575
response to abiotic stimulus	Gene Ontology	GO:0009628	36	164	0.0127507	Afu3g07990-T|Afu5g10270-T|Afu4g12990-T|Afu6g04940-T|Afu2g01170-T|Afu4g09050-T|Afu5g12960-T|Afu2g13440-T|Afu2g09290-T|Afu1g15950-T|Afu8g05630-T|Afu1g02700-T|Afu3g05650-T|Afu5g08480-T|Afu4g04502-T|Afu1g03040-T|Afu4g11330-T|Afu5g04170-T|Afu1g10850-T|Afu2g17170-T|Afu1g15520-T|Afu4g09650-T|Afu2g00660-T|Afu6g14210-T|Afu8g04890-T|Afu1g07440-T|Afu6g09260-T|Afu5g13890-T|Afu4g12850-T|Afu3g10960-T|Afu1g0504…	http://amigo.geneontology.org/cgi-bin/amigo/term_details?term=GO:0009628
nucleophagy	Gene Ontology	GO:0044804	6	11	0.0131021	Afu2g17110-T|Afu6g12350-T|Afu4g09050-T|Afu1g07470-T|Afu5g08170-T|Afu2g10900-T	http://amigo.geneontology.org/cgi-bin/amigo/term_details?term=GO:0044804
piecemeal microautophagy of nucleus	Gene Ontology	GO:0034727	6	11	0.0131021	Afu2g17110-T|Afu6g12350-T|Afu4g09050-T|Afu1g07470-T|Afu5g08170-T|Afu2g10900-T	http://amigo.geneontology.org/cgi-bin/amigo/term_details?term=GO:0034727
cellular carbohydrate biosynthetic process	Gene Ontology	GO:0034637	16	56	0.0133913	Afu2g13440-T|Afu6g09390-T|Afu2g04020-T|Afu8g05630-T|Afu1g12040-T|Afu3g11830-T|Afu2g07590-T|Afu3g05650-T|Afu2g01010-T|Afu2g04620-T|Afu6g12400-T|Afu8g05620-T|Afu2g04010-T|Afu5g07430-T|Afu2g01170-T|Afu1g15440-T	http://amigo.geneontology.org/cgi-bin/amigo/term_details?term=GO:0034637
amide transport	Gene Ontology	GO:0042886	8	19	0.013724	Afu1g07440-T|Afu4g10000-T|Afu2g15240-T|Afu1g04870-T|Afu5g07970-T|Afu6g10630-T|Afu5g01630-T|Afu6g14210-T	http://amigo.geneontology.org/cgi-bin/amigo/term_details?term=GO:0042886
protein folding	Gene Ontology	GO:0006457	16	57	0.0152394	Afu1g07440-T|Afu2g11750-T|Afu5g10270-T|Afu6g10700-T|Afu5g04170-T|Afu4g10010-T|Afu2g09290-T|Afu1g15270-T|Afu1g05040-T|Afu1g02170-T|Afu5g07340-T|Afu2g04620-T|Afu4g12850-T|Afu4g11330-T|Afu1g12040-T|Afu5g13920-T	http://amigo.geneontology.org/cgi-bin/amigo/term_details?term=GO:0006457
protein ubiquitination	Gene Ontology	GO:0016567	13	43	0.0172075	Afu5g07040-T|Afu5g12530-T|Afu7g04260-T|Afu2g17110-T|Afu1g05040-T|Afu5g12230-T|Afu2g14110-T|Afu4g12080-T|Afu4g07340-T|Afu1g12080-T|Afu6g10530-T|Afu2g11040-T|Afu6g14210-T	http://amigo.geneontology.org/cgi-bin/amigo/term_details?term=GO:0016567
homeostatic process	Gene Ontology	GO:0042592	33	151	0.017422	Afu6g07870-T|Afu4g04318-T|Afu4g12990-T|Afu2g15000-T|Afu1g17270-T|Afu3g08850-T|Afu5g11260-T|Afu3g11830-T|Afu2g08900-T|Afu1g14250-T|Afu5g11320-T|Afu5g13920-T|Afu3g09970-T|Afu5g04170-T|Afu1g05320-T|Afu7g06570-T|Afu2g17170-T|Afu2g00450-T|Afu4g09440-T|Afu4g12620-T|Afu2g03210-T|Afu3g12740-T|Afu2g12480-T|Afu6g07980-T|Afu2g16240-T|Afu3g11630-T|Afu6g14210-T|Afu2g14220-T|Afu4g13660-T|Afu5g07970-T|Afu1g1085…	http://amigo.geneontology.org/cgi-bin/amigo/term_details?term=GO:0042592
late nucleophagy	Gene Ontology	GO:0044805	4	5	0.0175906	Afu4g09050-T|Afu1g07470-T|Afu6g12350-T|Afu5g08170-T	http://amigo.geneontology.org/cgi-bin/amigo/term_details?term=GO:0044805
cellular amide catabolic process	Gene Ontology	GO:0043605	7	16	0.0178489	Afu1g03860-T|Afu3g08050-T|Afu2g02250-T|Afu3g12560-T|Afu1g15520-T|Afu5g06680-T|Afu6g08000-T	http://amigo.geneontology.org/cgi-bin/amigo/term_details?term=GO:0043605
DNA repair	Gene Ontology	GO:0006281	28	123	0.0178971	Afu4g03840-T|Afu4g11140-T|Afu3g14550-T|Afu4g03150-T|Afu1g02700-T|Afu5g03450-T|Afu6g14210-T|Afu7g02200-T|Afu4g08900-T|Afu2g04860-T|Afu1g06720-T|Afu3g11140-T|Afu2g08540-T|Afu5g06690-T|Afu4g12080-T|Afu2g03070-T|Afu6g13340-T|Afu6g07980-T|Afu7g01280-T|Afu1g03050-T|Afu8g05820-T|Afu6g08570-T|Afu1g11170-T|Afu4g11620-T|Afu2g08840-T|Afu4g06490-T|Afu6g07500-T|Afu6g10530-T	http://amigo.geneontology.org/cgi-bin/amigo/term_details?term=GO:0006281
cell wall beta-glucan metabolic process	Gene Ontology	GO:0034406	5	9	0.0220519	Afu5g07430-T|Afu2g04620-T|Afu2g01170-T|Afu6g12400-T|Afu8g05620-T	http://amigo.geneontology.org/cgi-bin/amigo/term_details?term=GO:0034406
protein modification by small protein conjugation or removal	Gene Ontology	GO:0070647	19	76	0.0224022	Afu5g07040-T|Afu5g12530-T|Afu7g04260-T|Afu2g17110-T|Afu1g05040-T|Afu1g10850-T|Afu2g14110-T|Afu5g12230-T|Afu1g02700-T|Afu2g11040-T|Afu4g06830-T|Afu4g12080-T|Afu4g07340-T|Afu1g12080-T|Afu6g10530-T|Afu5g10480-T|Afu4g12910-T|Afu5g01750-T|Afu6g14210-T	http://amigo.geneontology.org/cgi-bin/amigo/term_details?term=GO:0070647
response to osmotic stress	Gene Ontology	GO:0006970	13	45	0.022773	Afu2g13440-T|Afu2g17170-T|Afu1g15950-T|Afu6g12410-T|Afu4g09050-T|Afu3g05650-T|Afu5g09100-T|Afu5g08480-T|Afu1g03040-T|Afu2g00660-T|Afu1g02480-T|Afu2g01170-T|Afu8g04890-T	http://amigo.geneontology.org/cgi-bin/amigo/term_details?term=GO:0006970
cellular response to chemical stimulus	Gene Ontology	GO:0070887	62	329	0.0227794	Afu6g04750-T|Afu6g10740-T|Afu5g10270-T|Afu2g07590-T|Afu5g11430-T|Afu5g10480-T|Afu2g10980-T|Afu5g09100-T|Afu7g01280-T|Afu6g11430-T|Afu5g05480-T|Afu1g09950-T|Afu2g01170-T|Afu2g17130-T|Afu5g12960-T|Afu1g12310-T|Afu4g04280-T|Afu6g12400-T|Afu1g07470-T|Afu3g08850-T|Afu1g15950-T|Afu4g08170-T|Afu4g09050-T|Afu3g05650-T|Afu5g06070-T|Afu6g04360-T|Afu8g04100-T|Afu2g15790-T|Afu2g01850-T|Afu1g15440-T|Afu2g1023…	http://amigo.geneontology.org/cgi-bin/amigo/term_details?term=GO:0070887
beta-glucan biosynthetic process	Gene Ontology	GO:0051274	6	13	0.0231423	Afu5g07430-T|Afu2g04620-T|Afu2g07590-T|Afu6g12400-T|Afu8g05620-T|Afu2g01170-T	http://amigo.geneontology.org/cgi-bin/amigo/term_details?term=GO:0051274
response to topologically incorrect protein	Gene Ontology	GO:0035966	9	26	0.0234896	Afu5g09310-T|Afu4g12850-T|Afu2g17110-T|Afu2g04620-T|Afu5g10270-T|Afu6g04750-T|Afu1g15270-T|Afu6g14210-T|Afu1g01720-T	http://amigo.geneontology.org/cgi-bin/amigo/term_details?term=GO:0035966
cell wall polysaccharide biosynthetic process	Gene Ontology	GO:0070592	8	22	0.0258928	Afu2g13440-T|Afu5g07430-T|Afu1g12040-T|Afu8g05630-T|Afu2g04620-T|Afu6g12400-T|Afu8g05620-T|Afu2g01170-T	http://amigo.geneontology.org/cgi-bin/amigo/term_details?term=GO:0070592
fungal-type cell wall beta-glucan biosynthetic process	Gene Ontology	GO:0070880	4	6	0.0264908	Afu2g04620-T|Afu2g01170-T|Afu6g12400-T|Afu8g05620-T	http://amigo.geneontology.org/cgi-bin/amigo/term_details?term=GO:0070880
fungal-type cell wall beta-glucan metabolic process	Gene Ontology	GO:0070879	4	6	0.0264908	Afu2g04620-T|Afu2g01170-T|Afu6g12400-T|Afu8g05620-T	http://amigo.geneontology.org/cgi-bin/amigo/term_details?term=GO:0070879
transmembrane transport	Gene Ontology	GO:0055085	83	464	0.0265862	Afu8g02200-T|Afu6g13780-T|Afu8g04150-T|Afu5g10630-T|Afu6g00130-T|Afu4g10000-T|Afu7g05100-T|Afu2g16210-T|Afu4g03740-T|Afu4g08740-T|Afu4g11400-T|Afu4g00800-T|Afu8g02010-T|Afu2g15000-T|Afu1g04870-T|Afu6g06680-T|Afu2g00810-T|Afu5g06580-T|Afu5g06070-T|Afu2g15240-T|Afu5g00930-T|Afu2g05190-T|Afu3g08850-T|Afu1g12620-T|Afu2g02430-T|Afu6g02820-T|Afu2g08900-T|Afu2g08910-T|Afu1g14250-T|Afu1g01812-T|Afu2g0462…	http://amigo.geneontology.org/cgi-bin/amigo/term_details?term=GO:0055085
response to endoplasmic reticulum stress	Gene Ontology	GO:0034976	9	27	0.0279887	Afu5g07040-T|Afu5g09310-T|Afu5g04060-T|Afu4g12850-T|Afu2g17110-T|Afu1g05040-T|Afu2g04620-T|Afu6g14210-T|Afu1g01720-T	http://amigo.geneontology.org/cgi-bin/amigo/term_details?term=GO:0034976
cellular carbohydrate metabolic process	Gene Ontology	GO:0044262	31	146	0.0280413	Afu7g06390-T|Afu8g05630-T|Afu2g07590-T|Afu2g01170-T|Afu5g11100-T|Afu6g09390-T|Afu3g05650-T|Afu4g13530-T|Afu1g12040-T|Afu3g11830-T|Afu4g03900-T|Afu7g01320-T|Afu2g01010-T|Afu8g05620-T|Afu8g02000-T|Afu1g15440-T|Afu2g10230-T|Afu2g04600-T|Afu5g07430-T|Afu2g04620-T|Afu2g13440-T|Afu2g00450-T|Afu2g03980-T|Afu6g12400-T|Afu4g12050-T|Afu4g11540-T|Afu2g04020-T|Afu2g00990-T|Afu2g04010-T|Afu7g06370-T|Afu1g0172…	http://amigo.geneontology.org/cgi-bin/amigo/term_details?term=GO:0044262
lysosomal microautophagy	Gene Ontology	GO:0016237	6	14	0.0296912	Afu2g17110-T|Afu6g12350-T|Afu4g09050-T|Afu1g07470-T|Afu5g08170-T|Afu2g10900-T	http://amigo.geneontology.org/cgi-bin/amigo/term_details?term=GO:0016237
glutamine family amino acid catabolic process	Gene Ontology	GO:0009065	5	10	0.0297849	Afu3g11430-T|Afu1g02780-T|Afu4g08170-T|Afu4g09140-T|Afu6g08760-T	http://amigo.geneontology.org/cgi-bin/amigo/term_details?term=GO:0009065
protein ubiquitination involved in ubiquitin-dependent protein catabolic process	Gene Ontology	GO:0042787	5	10	0.0297849	Afu5g07040-T|Afu2g14110-T|Afu1g05040-T|Afu6g14210-T|Afu6g10530-T	http://amigo.geneontology.org/cgi-bin/amigo/term_details?term=GO:0042787
polysaccharide biosynthetic process	Gene Ontology	GO:0000271	12	42	0.0298306	Afu2g13440-T|Afu6g09390-T|Afu8g05630-T|Afu1g12040-T|Afu3g11830-T|Afu2g07590-T|Afu2g04620-T|Afu6g12400-T|Afu8g05620-T|Afu5g07430-T|Afu2g01170-T|Afu1g15440-T	http://amigo.geneontology.org/cgi-bin/amigo/term_details?term=GO:0000271
cellular polysaccharide biosynthetic process	Gene Ontology	GO:0033692	12	42	0.0298306	Afu2g13440-T|Afu6g09390-T|Afu8g05630-T|Afu1g12040-T|Afu3g11830-T|Afu2g07590-T|Afu2g04620-T|Afu6g12400-T|Afu8g05620-T|Afu5g07430-T|Afu2g01170-T|Afu1g15440-T	http://amigo.geneontology.org/cgi-bin/amigo/term_details?term=GO:0033692
cell wall organization or biogenesis	Gene Ontology	GO:0071554	32	153	0.0304015	Afu3g14620-T|Afu6g07120-T|Afu3g08520-T|Afu1g15420-T|Afu2g07590-T|Afu5g05480-T|Afu2g02480-T|Afu2g14600-T|Afu2g01170-T|Afu2g13440-T|Afu3g05650-T|Afu1g15950-T|Afu1g12040-T|Afu8g05630-T|Afu7g01320-T|Afu3g00320-T|Afu8g05620-T|Afu2g15790-T|Afu5g07430-T|Afu2g04620-T|Afu2g13430-T|Afu4g00620-T|Afu5g04090-T|Afu6g07890-T|Afu6g12400-T|Afu4g09940-T|Afu5g04060-T|Afu4g13660-T|Afu6g12410-T|Afu3g02090-T|Afu4g0682…	http://amigo.geneontology.org/cgi-bin/amigo/term_details?term=GO:0071554
fungal-type cell wall organization or biogenesis	Gene Ontology	GO:0071852	24	107	0.0306307	Afu6g07120-T|Afu4g06820-T|Afu5g05480-T|Afu2g02480-T|Afu2g01170-T|Afu2g13440-T|Afu1g15950-T|Afu1g12040-T|Afu8g05630-T|Afu3g05650-T|Afu8g05620-T|Afu2g15790-T|Afu5g07430-T|Afu2g04620-T|Afu2g13430-T|Afu4g00620-T|Afu5g04090-T|Afu6g07890-T|Afu6g12400-T|Afu4g09940-T|Afu5g04060-T|Afu4g13660-T|Afu6g12410-T|Afu1g01720-T	http://amigo.geneontology.org/cgi-bin/amigo/term_details?term=GO:0071852
cellular response to topologically incorrect protein	Gene Ontology	GO:0035967	8	23	0.0312327	Afu5g09310-T|Afu4g12850-T|Afu2g17110-T|Afu5g10270-T|Afu6g04750-T|Afu1g15270-T|Afu6g14210-T|Afu1g01720-T	http://amigo.geneontology.org/cgi-bin/amigo/term_details?term=GO:0035967
cell wall biogenesis	Gene Ontology	GO:0042546	15	58	0.0317956	Afu2g13440-T|Afu4g06820-T|Afu5g07430-T|Afu1g12040-T|Afu8g05630-T|Afu2g07590-T|Afu4g00620-T|Afu4g13660-T|Afu2g04620-T|Afu6g12400-T|Afu8g05620-T|Afu2g02480-T|Afu2g14600-T|Afu2g01170-T|Afu4g09940-T	http://amigo.geneontology.org/cgi-bin/amigo/term_details?term=GO:0042546
response to organic substance	Gene Ontology	GO:0010033	22	97	0.0340678	Afu6g10740-T|Afu5g10270-T|Afu3g14330-T|Afu6g04750-T|Afu2g17130-T|Afu5g07040-T|Afu4g13530-T|Afu8g04100-T|Afu5g09310-T|Afu5g04170-T|Afu2g04620-T|Afu2g16240-T|Afu1g15270-T|Afu6g14210-T|Afu5g02920-T|Afu5g04060-T|Afu4g12850-T|Afu2g17110-T|Afu1g05040-T|Afu3g08050-T|Afu2g00660-T|Afu1g01720-T	http://amigo.geneontology.org/cgi-bin/amigo/term_details?term=GO:0010033
glucan biosynthetic process	Gene Ontology	GO:0009250	8	24	0.0372793	Afu5g07430-T|Afu2g04620-T|Afu3g11830-T|Afu2g07590-T|Afu6g12400-T|Afu8g05620-T|Afu2g01170-T|Afu1g15440-T	http://amigo.geneontology.org/cgi-bin/amigo/term_details?term=GO:0009250
ascospore wall biogenesis	Gene Ontology	GO:0070591	6	15	0.0373452	Afu4g06820-T|Afu8g05630-T|Afu4g13660-T|Afu2g02480-T|Afu2g01170-T|Afu4g09940-T	http://amigo.geneontology.org/cgi-bin/amigo/term_details?term=GO:0070591
mitophagy	Gene Ontology	GO:0000422	4	7	0.0376352	Afu4g09050-T|Afu1g07470-T|Afu6g12350-T|Afu5g08170-T	http://amigo.geneontology.org/cgi-bin/amigo/term_details?term=GO:0000422
protein polyubiquitination	Gene Ontology	GO:0000209	4	7	0.0376352	Afu2g14110-T|Afu4g12080-T|Afu6g14210-T|Afu7g04260-T	http://amigo.geneontology.org/cgi-bin/amigo/term_details?term=GO:0000209
mitochondrion disassembly	Gene Ontology	GO:0061726	4	7	0.0376352	Afu4g09050-T|Afu1g07470-T|Afu6g12350-T|Afu5g08170-T	http://amigo.geneontology.org/cgi-bin/amigo/term_details?term=GO:0061726
amino sugar biosynthetic process	Gene Ontology	GO:0046349	5	11	0.039028	Afu7g02180-T|Afu1g12040-T|Afu8g05630-T|Afu2g13440-T|Afu8g05620-T	http://amigo.geneontology.org/cgi-bin/amigo/term_details?term=GO:0046349
telomere organization	Gene Ontology	GO:0032200	7	20	0.0417383	Afu5g04170-T|Afu1g10850-T|Afu5g13920-T|Afu2g03210-T|Afu6g07980-T|Afu3g11630-T|Afu6g14210-T	http://amigo.geneontology.org/cgi-bin/amigo/term_details?term=GO:0032200
macroautophagy	Gene Ontology	GO:0016236	7	20	0.0417383	Afu1g14300-T|Afu2g17110-T|Afu6g12350-T|Afu4g09050-T|Afu1g07470-T|Afu5g08170-T|Afu2g10900-T	http://amigo.geneontology.org/cgi-bin/amigo/term_details?term=GO:0016236
anatomical structure homeostasis	Gene Ontology	GO:0060249	7	20	0.0417383	Afu5g04170-T|Afu1g10850-T|Afu5g13920-T|Afu2g03210-T|Afu6g07980-T|Afu3g11630-T|Afu6g14210-T	http://amigo.geneontology.org/cgi-bin/amigo/term_details?term=GO:0060249
telomere maintenance	Gene Ontology	GO:0000723	7	20	0.0417383	Afu5g04170-T|Afu1g10850-T|Afu5g13920-T|Afu2g03210-T|Afu6g07980-T|Afu3g11630-T|Afu6g14210-T	http://amigo.geneontology.org/cgi-bin/amigo/term_details?term=GO:0000723
carbohydrate biosynthetic process	Gene Ontology	GO:0016051	16	66	0.0419066	Afu2g13440-T|Afu6g09390-T|Afu2g04020-T|Afu8g05630-T|Afu1g12040-T|Afu3g11830-T|Afu2g07590-T|Afu3g05650-T|Afu2g01010-T|Afu2g04620-T|Afu6g12400-T|Afu8g05620-T|Afu2g04010-T|Afu5g07430-T|Afu2g01170-T|Afu1g15440-T	http://amigo.geneontology.org/cgi-bin/amigo/term_details?term=GO:0016051
fungal-type cell wall biogenesis	Gene Ontology	GO:0009272	12	45	0.0435965	Afu4g06820-T|Afu5g07430-T|Afu1g12040-T|Afu8g05630-T|Afu4g00620-T|Afu4g13660-T|Afu2g04620-T|Afu6g12400-T|Afu8g05620-T|Afu2g02480-T|Afu2g01170-T|Afu4g09940-T	http://amigo.geneontology.org/cgi-bin/amigo/term_details?term=GO:0009272
cell wall macromolecule biosynthetic process	Gene Ontology	GO:0044038	9	30	0.0450304	Afu2g13440-T|Afu5g07430-T|Afu1g12040-T|Afu8g05630-T|Afu2g04620-T|Afu6g12400-T|Afu8g05620-T|Afu2g14600-T|Afu2g01170-T	http://amigo.geneontology.org/cgi-bin/amigo/term_details?term=GO:0044038
cellular component macromolecule biosynthetic process	Gene Ontology	GO:0070589	9	30	0.0450304	Afu2g13440-T|Afu5g07430-T|Afu1g12040-T|Afu8g05630-T|Afu2g04620-T|Afu6g12400-T|Afu8g05620-T|Afu2g14600-T|Afu2g01170-T	http://amigo.geneontology.org/cgi-bin/amigo/term_details?term=GO:0070589

## Sheet: GOdown xylP HS 15' vs xylP 30ºC
#Term	Database	ID	Input number	Background number	P-Value	Input	Hyperlink
ribosome biogenesis	Gene Ontology	GO:0042254	103	144	1.89981e-24	Afu2g06310-T|Afu6g06430-T|Afu6g01990-T|Afu2g01480-T|Afu2g03590-T|Afu6g04570-T|Afu1g11130-T|Afu1g13070-T|Afu7g04430-T|Afu5g06510-T|Afu2g16750-T|Afu5g13470-T|Afu4g05880-T|Afu2g02150-T|Afu3g11110-T|Afu1g16730-T|Afu6g10320-T|Afu2g13570-T|Afu1g04240-T|Afu7g04860-T|Afu1g10990-T|Afu3g12490-T|Afu4g08190-T|Afu6g04330-T|Afu2g04800-T|Afu6g09820-T|Afu7g01460-T|Afu6g12920-T|Afu3g09600-T|Afu3g09880-T|Afu4g0757…	http://amigo.geneontology.org/cgi-bin/amigo/term_details?term=GO:0042254
ribonucleoprotein complex biogenesis	Gene Ontology	GO:0022613	103	161	8.66888e-22	Afu2g06310-T|Afu6g06430-T|Afu6g01990-T|Afu2g01480-T|Afu2g03590-T|Afu6g04570-T|Afu1g11130-T|Afu1g13070-T|Afu7g04430-T|Afu5g06510-T|Afu2g16750-T|Afu5g13470-T|Afu4g05880-T|Afu2g02150-T|Afu3g11110-T|Afu1g16730-T|Afu6g10320-T|Afu2g13570-T|Afu1g04240-T|Afu7g04860-T|Afu1g10990-T|Afu3g12490-T|Afu4g08190-T|Afu6g04330-T|Afu2g04800-T|Afu6g09820-T|Afu7g01460-T|Afu6g12920-T|Afu3g09600-T|Afu3g09880-T|Afu4g0757…	http://amigo.geneontology.org/cgi-bin/amigo/term_details?term=GO:0022613
rRNA processing	Gene Ontology	GO:0006364	66	98	3.546e-15	Afu2g06310-T|Afu2g17060-T|Afu1g14580-T|Afu5g03870-T|Afu7g02140-T|Afu6g06430-T|Afu6g08900-T|Afu7g04490-T|Afu3g06010-T|Afu5g05450-T|Afu2g04800-T|Afu6g01990-T|Afu3g09880-T|Afu8g04220-T|Afu2g13980-T|Afu4g07570-T|Afu2g03590-T|Afu5g05710-T|Afu3g06640-T|Afu7g00870-T|Afu4g13450-T|Afu1g13070-T|Afu8g03930-T|Afu7g04430-T|Afu3g06580-T|Afu2g11510-T|Afu1g04840-T|Afu2g08320-T|Afu5g12100-T|Afu1g13460-T|Afu6g0426…	http://amigo.geneontology.org/cgi-bin/amigo/term_details?term=GO:0006364
rRNA metabolic process	Gene Ontology	GO:0016072	67	103	7.47782e-15	Afu2g06310-T|Afu2g09200-T|Afu2g17060-T|Afu1g14580-T|Afu5g03870-T|Afu7g02140-T|Afu6g06430-T|Afu6g08900-T|Afu7g04490-T|Afu3g06010-T|Afu5g05450-T|Afu2g04800-T|Afu6g01990-T|Afu3g09880-T|Afu8g04220-T|Afu2g13980-T|Afu4g07570-T|Afu2g03590-T|Afu5g05710-T|Afu3g06640-T|Afu7g00870-T|Afu4g13450-T|Afu1g13070-T|Afu8g03930-T|Afu7g04430-T|Afu3g06580-T|Afu2g11510-T|Afu1g04840-T|Afu2g08320-T|Afu5g12100-T|Afu1g1346…	http://amigo.geneontology.org/cgi-bin/amigo/term_details?term=GO:0016072
ncRNA processing	Gene Ontology	GO:0034470	78	150	3.69433e-13	Afu2g06310-T|Afu2g17060-T|Afu1g14580-T|Afu5g03870-T|Afu7g02140-T|Afu6g06430-T|Afu6g08900-T|Afu7g04490-T|Afu2g16360-T|Afu4g04260-T|Afu5g05450-T|Afu2g04800-T|Afu6g01990-T|Afu3g09880-T|Afu1g07570-T|Afu8g04220-T|Afu2g13980-T|Afu4g07570-T|Afu2g03590-T|Afu5g05710-T|Afu1g14630-T|Afu3g06640-T|Afu7g00870-T|Afu4g13450-T|Afu1g13070-T|Afu8g03930-T|Afu7g04430-T|Afu3g06580-T|Afu6g13370-T|Afu2g11510-T|Afu1g0484…	http://amigo.geneontology.org/cgi-bin/amigo/term_details?term=GO:0034470
ncRNA metabolic process	Gene Ontology	GO:0034660	88	197	7.77597e-12	Afu2g06310-T|Afu8g00100-T|Afu6g06430-T|Afu4g04260-T|Afu6g01990-T|Afu2g03590-T|Afu1g16210-T|Afu7g00870-T|Afu1g13070-T|Afu7g04430-T|Afu1g14180-T|Afu5g13470-T|Afu1g02570-T|Afu4g05880-T|Afu7g03690-T|Afu6g04510-T|Afu3g11110-T|Afu1g16730-T|Afu8g07110-T|Afu7g04860-T|Afu1g10990-T|Afu6g04330-T|Afu6g09820-T|Afu3g09600-T|Afu1g07570-T|Afu4g07570-T|Afu6g08900-T|Afu5g12100-T|Afu2g16360-T|Afu2g05480-T|Afu8g0422…	http://amigo.geneontology.org/cgi-bin/amigo/term_details?term=GO:0034660
ribosomal small subunit biogenesis	Gene Ontology	GO:0042274	39	50	7.5275e-11	Afu7g02140-T|Afu6g06430-T|Afu1g05340-T|Afu5g05450-T|Afu2g04800-T|Afu8g04220-T|Afu2g10440-T|Afu2g03590-T|Afu3g06640-T|Afu1g13070-T|Afu7g04430-T|Afu7g04490-T|Afu1g04840-T|Afu3g09340-T|Afu6g04590-T|Afu4g05880-T|Afu6g13370-T|Afu3g04110-T|Afu1g09440-T|Afu1g05310-T|Afu2g10500-T|Afu3g11110-T|Afu4g10800-T|Afu3g13400-T|Afu3g11260-T|Afu3g06010-T|Afu5g06520-T|Afu2g12890-T|Afu2g08320-T|Afu7g04860-T|Afu6g1426…	http://amigo.geneontology.org/cgi-bin/amigo/term_details?term=GO:0042274
organonitrogen compound biosynthetic process	Gene Ontology	GO:1901566	154	482	3.94691e-10	Afu8g00420-T|Afu8g04340-T|Afu8g00100-T|Afu6g11620-T|Afu7g05460-T|Afu4g04260-T|Afu2g16370-T|Afu2g03590-T|Afu6g11260-T|Afu1g16210-T|Afu6g04570-T|Afu1g11130-T|Afu4g07845-T|Afu4g06690-T|Afu2g07680-T|Afu2g03610-T|Afu5g05690-T|Afu1g03110-T|Afu4g13170-T|Afu5g02760-T|Afu6g12060-T|Afu6g12580-T|Afu4g08110-T|Afu4g08010-T|Afu1g09330-T|Afu1g15780-T|Afu7g03980-T|Afu2g14210-T|Afu1g12940-T|Afu1g15000-T|Afu4g0766…	http://amigo.geneontology.org/cgi-bin/amigo/term_details?term=GO:1901566
maturation of SSU-rRNA	Gene Ontology	GO:0030490	33	41	1.24151e-09	Afu7g02140-T|Afu6g06430-T|Afu5g05450-T|Afu2g04800-T|Afu8g04220-T|Afu2g10440-T|Afu2g03590-T|Afu3g06640-T|Afu1g04320-T|Afu7g04430-T|Afu7g04490-T|Afu1g04840-T|Afu3g09340-T|Afu6g04590-T|Afu4g05880-T|Afu6g13370-T|Afu3g04110-T|Afu1g09440-T|Afu2g02150-T|Afu2g10500-T|Afu3g11110-T|Afu3g13400-T|Afu3g11260-T|Afu3g06010-T|Afu2g12890-T|Afu1g04240-T|Afu7g04860-T|Afu6g14260-T|Afu6g04330-T|Afu3g13320-T|Afu6g0982…	http://amigo.geneontology.org/cgi-bin/amigo/term_details?term=GO:0030490
cellular component biogenesis	Gene Ontology	GO:0044085	147	464	1.63465e-09	Afu2g06310-T|Afu3g09370-T|Afu6g06430-T|Afu6g01990-T|Afu2g01480-T|Afu7g01400-T|Afu2g03590-T|Afu3g14010-T|Afu6g04570-T|Afu1g11130-T|Afu1g13070-T|Afu2g03870-T|Afu3g06330-T|Afu5g06510-T|Afu2g16750-T|Afu4g13170-T|Afu5g13470-T|Afu4g05880-T|Afu1g02550-T|Afu1g14580-T|Afu1g06880-T|Afu3g11360-T|Afu2g02150-T|Afu3g11110-T|Afu1g16730-T|Afu6g10320-T|Afu6g08660-T|Afu2g13570-T|Afu2g09060-T|Afu1g12940-T|Afu7g0486…	http://amigo.geneontology.org/cgi-bin/amigo/term_details?term=GO:0044085
peptide biosynthetic process	Gene Ontology	GO:0043043	85	216	2.54989e-09	Afu1g05200-T|Afu1g15730-T|Afu4g07730-T|Afu1g06520-T|Afu4g07435-T|Afu7g02140-T|Afu3g10730-T|Afu8g00100-T|Afu8g00370-T|Afu3g13730-T|Afu6g13990-T|Afu3g08640-T|Afu7g05460-T|Afu1g06340-T|Afu5g05450-T|Afu5g03020-T|Afu1g09100-T|Afu2g10440-T|Afu2g16370-T|Afu6g02910-T|Afu1g12490-T|Afu2g09210-T|Afu2g03590-T|Afu2g10100-T|Afu6g11260-T|Afu4g08110-T|Afu3g06640-T|Afu1g05990-T|Afu6g04570-T|Afu1g11130-T|Afu4g0784…	http://amigo.geneontology.org/cgi-bin/amigo/term_details?term=GO:0043043
maturation of SSU-rRNA from tricistronic rRNA transcript (SSU-rRNA, 5.8S rRNA, LSU-rRNA)	Gene Ontology	GO:0000462	30	36	4.01367e-09	Afu7g02140-T|Afu6g06430-T|Afu5g05450-T|Afu2g04800-T|Afu8g04220-T|Afu2g10440-T|Afu2g03590-T|Afu3g06640-T|Afu1g04320-T|Afu7g04430-T|Afu1g04840-T|Afu1g04240-T|Afu6g04590-T|Afu4g05880-T|Afu6g13370-T|Afu3g04110-T|Afu1g09440-T|Afu2g02150-T|Afu2g10500-T|Afu3g11110-T|Afu3g13400-T|Afu3g06010-T|Afu2g12890-T|Afu7g04860-T|Afu6g14260-T|Afu6g04330-T|Afu3g13320-T|Afu6g09820-T|Afu4g13330-T|Afu4g10800-T	http://amigo.geneontology.org/cgi-bin/amigo/term_details?term=GO:0000462
amide biosynthetic process	Gene Ontology	GO:0043604	89	235	4.78877e-09	Afu8g00420-T|Afu8g00100-T|Afu7g05460-T|Afu1g06340-T|Afu2g16370-T|Afu1g04530-T|Afu2g03590-T|Afu6g11260-T|Afu1g16210-T|Afu6g04570-T|Afu1g11130-T|Afu4g07845-T|Afu1g03110-T|Afu4g13170-T|Afu1g02570-T|Afu4g08110-T|Afu1g09330-T|Afu7g03980-T|Afu1g12940-T|Afu4g07660-T|Afu1g06830-T|Afu7g01460-T|Afu3g13730-T|Afu5g11985-T|Afu1g05200-T|Afu1g15730-T|Afu1g12490-T|Afu2g09210-T|Afu2g10090-T|Afu1g04320-T|Afu8g0017…	http://amigo.geneontology.org/cgi-bin/amigo/term_details?term=GO:0043604
translation	Gene Ontology	GO:0006412	72	172	5.68172e-09	Afu1g05200-T|Afu1g15730-T|Afu4g07730-T|Afu1g06520-T|Afu4g07435-T|Afu7g02140-T|Afu3g10730-T|Afu8g00100-T|Afu3g08640-T|Afu7g05460-T|Afu1g06340-T|Afu5g05450-T|Afu5g03020-T|Afu1g09100-T|Afu2g16370-T|Afu2g10440-T|Afu2g09210-T|Afu2g03590-T|Afu2g10100-T|Afu6g11260-T|Afu4g08110-T|Afu3g06640-T|Afu1g05990-T|Afu6g04570-T|Afu1g11130-T|Afu4g07845-T|Afu8g03930-T|Afu7g04490-T|Afu5g11985-T|Afu5g06360-T|Afu1g0550…	http://amigo.geneontology.org/cgi-bin/amigo/term_details?term=GO:0006412
ribosomal large subunit biogenesis	Gene Ontology	GO:0042273	33	46	9.39652e-09	Afu2g06310-T|Afu2g17060-T|Afu5g03870-T|Afu6g08900-T|Afu5g12100-T|Afu1g01990-T|Afu2g08480-T|Afu6g01990-T|Afu2g01480-T|Afu2g13980-T|Afu2g09210-T|Afu8g04790-T|Afu1g11130-T|Afu7g04430-T|Afu3g06580-T|Afu5g06510-T|Afu2g11510-T|Afu4g07630-T|Afu5g13470-T|Afu1g04040-T|Afu6g04260-T|Afu1g09200-T|Afu5g12270-T|Afu1g06230-T|Afu1g05080-T|Afu1g06600-T|Afu1g16330-T|Afu4g07730-T|Afu4g07570-T|Afu4g13330-T|Afu1g1076…	http://amigo.geneontology.org/cgi-bin/amigo/term_details?term=GO:0042273
peptide metabolic process	Gene Ontology	GO:0006518	87	232	1.03688e-08	Afu8g00100-T|Afu7g05460-T|Afu1g06340-T|Afu2g16370-T|Afu1g04530-T|Afu2g03590-T|Afu6g11260-T|Afu1g16210-T|Afu6g04570-T|Afu1g11130-T|Afu4g07845-T|Afu1g03110-T|Afu4g13170-T|Afu1g02570-T|Afu4g08110-T|Afu1g09330-T|Afu7g03980-T|Afu1g12940-T|Afu4g07660-T|Afu1g06830-T|Afu7g01460-T|Afu3g13730-T|Afu5g11985-T|Afu1g05200-T|Afu1g15730-T|Afu1g12490-T|Afu2g09210-T|Afu2g10090-T|Afu1g04320-T|Afu8g00170-T|Afu1g0404…	http://amigo.geneontology.org/cgi-bin/amigo/term_details?term=GO:0006518
RNA processing	Gene Ontology	GO:0006396	84	223	1.58629e-08	Afu2g06310-T|Afu2g09200-T|Afu2g17060-T|Afu1g14580-T|Afu5g03870-T|Afu7g02140-T|Afu6g06430-T|Afu6g08900-T|Afu7g04490-T|Afu2g16360-T|Afu4g04260-T|Afu5g05450-T|Afu2g04800-T|Afu6g01990-T|Afu3g09880-T|Afu1g07570-T|Afu8g04220-T|Afu2g13980-T|Afu4g07570-T|Afu2g03590-T|Afu5g05710-T|Afu1g14630-T|Afu3g06640-T|Afu4g10800-T|Afu5g13470-T|Afu7g00870-T|Afu4g13450-T|Afu1g13070-T|Afu8g03930-T|Afu7g04430-T|Afu2g1604…	http://amigo.geneontology.org/cgi-bin/amigo/term_details?term=GO:0006396
nitrogen compound metabolic process	Gene Ontology	GO:0006807	365	1523	2.9503e-08	Afu2g06310-T|Afu5g01272-T|Afu8g01240-T|Afu2g16370-T|Afu6g04570-T|Afu4g07845-T|Afu5g05690-T|Afu1g03110-T|Afu4g13170-T|Afu5g13470-T|Afu5g02760-T|Afu8g01410-T|Afu4g08110-T|Afu6g04510-T|Afu4g08410-T|Afu3g11110-T|Afu8g04050-T|Afu7g04860-T|Afu1g04040-T|Afu1g15620-T|Afu1g06340-T|Afu5g11985-T|Afu3g09600-T|Afu4g04270-T|Afu1g12490-T|Afu6g08900-T|Afu2g03700-T|Afu4g10620-T|Afu5g09450-T|Afu5g03960-T|Afu3g0275…	http://amigo.geneontology.org/cgi-bin/amigo/term_details?term=GO:0006807
cellular amide metabolic process	Gene Ontology	GO:0043603	93	271	1.00084e-07	Afu8g00420-T|Afu3g12120-T|Afu8g00100-T|Afu7g05460-T|Afu1g06340-T|Afu2g16370-T|Afu1g04530-T|Afu2g03590-T|Afu6g11260-T|Afu1g16210-T|Afu6g04570-T|Afu1g11130-T|Afu4g07845-T|Afu1g03110-T|Afu4g13170-T|Afu1g02570-T|Afu4g08110-T|Afu1g09330-T|Afu7g03980-T|Afu1g12940-T|Afu4g07660-T|Afu1g06830-T|Afu7g01460-T|Afu3g13730-T|Afu5g11985-T|Afu1g05200-T|Afu1g15730-T|Afu1g12490-T|Afu2g09210-T|Afu2g10090-T|Afu1g0432…	http://amigo.geneontology.org/cgi-bin/amigo/term_details?term=GO:0043603
organonitrogen compound metabolic process	Gene Ontology	GO:1901564	186	683	1.60645e-07	Afu8g00420-T|Afu8g00230-T|Afu8g00100-T|Afu6g11620-T|Afu7g05460-T|Afu3g12120-T|Afu4g04260-T|Afu2g16370-T|Afu6g10810-T|Afu2g03590-T|Afu6g11260-T|Afu1g16210-T|Afu6g04570-T|Afu5g04330-T|Afu4g07845-T|Afu4g06690-T|Afu2g07680-T|Afu2g03610-T|Afu5g05690-T|Afu1g03110-T|Afu4g13170-T|Afu3g09320-T|Afu5g02760-T|Afu6g12060-T|Afu6g12580-T|Afu3g11280-T|Afu8g01410-T|Afu6g07430-T|Afu4g08110-T|Afu4g08010-T|Afu1g0933…	http://amigo.geneontology.org/cgi-bin/amigo/term_details?term=GO:1901564
cellular nitrogen compound metabolic process	Gene Ontology	GO:0034641	316	1326	5.28328e-07	Afu2g06310-T|Afu8g00420-T|Afu8g00230-T|Afu1g04320-T|Afu5g01272-T|Afu6g10460-T|Afu8g01240-T|Afu5g09430-T|Afu3g06010-T|Afu7g05460-T|Afu3g01155-T|Afu4g04260-T|Afu6g01990-T|Afu4g14590-T|Afu1g15120-T|Afu1g06360-T|Afu8g00100-T|Afu1g04530-T|Afu2g03590-T|Afu8g04050-T|Afu6g11260-T|Afu1g16210-T|Afu5g06560-T|Afu6g04570-T|Afu5g04330-T|Afu4g07845-T|Afu7g04430-T|Afu4g06690-T|Afu6g11750-T|Afu3g14010-T|Afu2g0361…	http://amigo.geneontology.org/cgi-bin/amigo/term_details?term=GO:0034641
ribosome assembly	Gene Ontology	GO:0042255	24	34	1.20058e-06	Afu4g07570-T|Afu1g01990-T|Afu2g08480-T|Afu6g01990-T|Afu2g10440-T|Afu2g09210-T|Afu3g06580-T|Afu3g06640-T|Afu1g11130-T|Afu7g04430-T|Afu7g04490-T|Afu5g06510-T|Afu1g04840-T|Afu5g13520-T|Afu5g13470-T|Afu1g04040-T|Afu1g06230-T|Afu1g05080-T|Afu3g11260-T|Afu4g07730-T|Afu3g13320-T|Afu8g04790-T|Afu1g10760-T|Afu2g11850-T	http://amigo.geneontology.org/cgi-bin/amigo/term_details?term=GO:0042255
maturation of 5.8S rRNA from tricistronic rRNA transcript (SSU-rRNA, 5.8S rRNA, LSU-rRNA)	Gene Ontology	GO:0000466	25	38	1.83171e-06	Afu2g06310-T|Afu3g09880-T|Afu5g03870-T|Afu6g06430-T|Afu6g08900-T|Afu5g12100-T|Afu8g04220-T|Afu4g07570-T|Afu2g03590-T|Afu7g00870-T|Afu7g04430-T|Afu8g04790-T|Afu1g04840-T|Afu1g04240-T|Afu6g04260-T|Afu4g05880-T|Afu6g13370-T|Afu3g04110-T|Afu3g11110-T|Afu3g13400-T|Afu3g06010-T|Afu2g12890-T|Afu6g14260-T|Afu3g13320-T|Afu2g13130-T	http://amigo.geneontology.org/cgi-bin/amigo/term_details?term=GO:0000466
maturation of 5.8S rRNA	Gene Ontology	GO:0000460	25	38	1.83171e-06	Afu2g06310-T|Afu3g09880-T|Afu5g03870-T|Afu6g06430-T|Afu6g08900-T|Afu5g12100-T|Afu8g04220-T|Afu4g07570-T|Afu2g03590-T|Afu7g00870-T|Afu7g04430-T|Afu8g04790-T|Afu1g04840-T|Afu1g04240-T|Afu6g04260-T|Afu4g05880-T|Afu6g13370-T|Afu3g04110-T|Afu3g11110-T|Afu3g13400-T|Afu3g06010-T|Afu2g12890-T|Afu6g14260-T|Afu3g13320-T|Afu2g13130-T	http://amigo.geneontology.org/cgi-bin/amigo/term_details?term=GO:0000460
cleavage involved in rRNA processing	Gene Ontology	GO:0000469	22	30	2.12955e-06	Afu2g06310-T|Afu3g09880-T|Afu6g06430-T|Afu8g04220-T|Afu2g03590-T|Afu3g06640-T|Afu7g00870-T|Afu7g04430-T|Afu7g04490-T|Afu1g04840-T|Afu1g04240-T|Afu6g04590-T|Afu4g05880-T|Afu6g13370-T|Afu3g04110-T|Afu3g11110-T|Afu3g13400-T|Afu3g06010-T|Afu2g12890-T|Afu6g14260-T|Afu3g13320-T|Afu2g13130-T	http://amigo.geneontology.org/cgi-bin/amigo/term_details?term=GO:0000469
rRNA-containing ribonucleoprotein complex export from nucleus	Gene Ontology	GO:0071428	19	24	4.83428e-06	Afu5g06520-T|Afu2g10090-T|Afu5g06510-T|Afu1g06770-T|Afu4g08930-T|Afu3g13320-T|Afu4g04740-T|Afu8g03930-T|Afu7g04430-T|Afu1g04040-T|Afu7g04490-T|Afu1g05340-T|Afu2g11510-T|Afu3g11110-T|Afu2g16750-T|Afu7g01460-T|Afu6g12920-T|Afu6g12660-T|Afu1g05630-T	http://amigo.geneontology.org/cgi-bin/amigo/term_details?term=GO:0071428
endonucleolytic cleavage of tricistronic rRNA transcript (SSU-rRNA, 5.8S rRNA, LSU-rRNA)	Gene Ontology	GO:0000479	17	20	8.01101e-06	Afu2g06310-T|Afu2g03590-T|Afu2g12890-T|Afu4g05880-T|Afu3g06640-T|Afu6g13370-T|Afu3g04110-T|Afu1g04240-T|Afu7g04430-T|Afu6g14260-T|Afu3g13320-T|Afu3g11110-T|Afu1g04840-T|Afu6g06430-T|Afu3g13400-T|Afu8g04220-T|Afu3g06010-T	http://amigo.geneontology.org/cgi-bin/amigo/term_details?term=GO:0000479
endonucleolytic cleavage involved in rRNA processing	Gene Ontology	GO:0000478	17	21	1.24651e-05	Afu2g06310-T|Afu2g03590-T|Afu2g12890-T|Afu4g05880-T|Afu3g06640-T|Afu6g13370-T|Afu3g04110-T|Afu1g04240-T|Afu7g04430-T|Afu6g14260-T|Afu3g13320-T|Afu3g11110-T|Afu1g04840-T|Afu6g06430-T|Afu3g13400-T|Afu8g04220-T|Afu3g06010-T	http://amigo.geneontology.org/cgi-bin/amigo/term_details?term=GO:0000478
cell cycle DNA replication	Gene Ontology	GO:0044786	18	25	2.13224e-05	Afu2g10730-T|Afu2g09060-T|Afu1g12940-T|Afu3g09560-T|Afu5g02520-T|Afu3g06060-T|Afu3g06580-T|Afu1g07320-T|Afu1g15310-T|Afu2g02660-T|Afu2g17050-T|Afu6g01990-T|Afu4g07970-T|Afu2g09010-T|Afu5g08110-T|Afu3g14010-T|Afu4g12210-T|Afu5g13370-T	http://amigo.geneontology.org/cgi-bin/amigo/term_details?term=GO:0044786
nuclear DNA replication	Gene Ontology	GO:0033260	18	25	2.13224e-05	Afu2g10730-T|Afu2g09060-T|Afu1g12940-T|Afu3g09560-T|Afu5g02520-T|Afu3g06060-T|Afu3g06580-T|Afu1g07320-T|Afu1g15310-T|Afu2g02660-T|Afu2g17050-T|Afu6g01990-T|Afu4g07970-T|Afu2g09010-T|Afu5g08110-T|Afu3g14010-T|Afu4g12210-T|Afu5g13370-T	http://amigo.geneontology.org/cgi-bin/amigo/term_details?term=GO:0033260
nuclear export	Gene Ontology	GO:0051168	24	43	2.29443e-05	Afu8g05680-T|Afu1g13140-T|Afu1g05340-T|Afu2g10090-T|Afu4g08930-T|Afu4g04740-T|Afu8g03930-T|Afu7g04430-T|Afu7g04490-T|Afu5g06510-T|Afu2g11510-T|Afu2g16750-T|Afu6g12660-T|Afu1g04190-T|Afu3g11110-T|Afu1g05630-T|Afu1g13900-T|Afu5g06520-T|Afu1g12940-T|Afu1g04040-T|Afu1g06770-T|Afu3g13320-T|Afu7g01460-T|Afu6g12920-T	http://amigo.geneontology.org/cgi-bin/amigo/term_details?term=GO:0051168
DNA-dependent DNA replication	Gene Ontology	GO:0006261	28	56	2.32534e-05	Afu1g03920-T|Afu2g16600-T|Afu6g01990-T|Afu4g12210-T|Afu5g08110-T|Afu4g04390-T|Afu1g07530-T|Afu3g06580-T|Afu3g14010-T|Afu2g12250-T|Afu5g01870-T|Afu4g04745-T|Afu3g09560-T|Afu4g07970-T|Afu2g09010-T|Afu5g13370-T|Afu2g10730-T|Afu2g09060-T|Afu3g08300-T|Afu1g12940-T|Afu5g02520-T|Afu3g06060-T|Afu1g07320-T|Afu2g02660-T|Afu2g17050-T|Afu1g03410-T|Afu6g13160-T|Afu1g15310-T	http://amigo.geneontology.org/cgi-bin/amigo/term_details?term=GO:0006261
cellular biosynthetic process	Gene Ontology	GO:0044249	297	1301	2.5898e-05	Afu8g06080-T|Afu6g11620-T|Afu3g00740-T|Afu5g01272-T|Afu6g10460-T|Afu8g01240-T|Afu4g13960-T|Afu8g00420-T|Afu7g05460-T|Afu3g01155-T|Afu4g04260-T|Afu6g01990-T|Afu2g16370-T|Afu8g00100-T|Afu1g04530-T|Afu2g03590-T|Afu8g04050-T|Afu6g11260-T|Afu1g16210-T|Afu5g06560-T|Afu6g04570-T|Afu2g05910-T|Afu4g07845-T|Afu1g14140-T|Afu4g06690-T|Afu6g11750-T|Afu3g14010-T|Afu2g03610-T|Afu5g05690-T|Afu2g12250-T|Afu5g0732…	http://amigo.geneontology.org/cgi-bin/amigo/term_details?term=GO:0044249
small molecule biosynthetic process	Gene Ontology	GO:0044283	87	292	2.68148e-05	Afu8g00420-T|Afu3g12120-T|Afu3g00740-T|Afu8g01240-T|Afu4g13960-T|Afu5g05690-T|Afu4g11500-T|Afu5g02760-T|Afu6g12060-T|Afu6g12580-T|Afu7g05920-T|Afu8g00200-T|Afu6g00660-T|Afu1g17190-T|Afu2g14210-T|Afu3g04210-T|Afu1g15000-T|Afu6g03670-T|Afu1g12490-T|Afu3g08660-T|Afu2g16360-T|Afu1g07380-T|Afu5g08890-T|Afu5g04250-T|Afu8g00230-T|Afu1g15780-T|Afu8g00500-T|Afu2g12470-T|Afu1g03195-T|Afu2g13250-T|Afu6g0482…	http://amigo.geneontology.org/cgi-bin/amigo/term_details?term=GO:0044283
organic substance biosynthetic process	Gene Ontology	GO:1901576	299	1314	2.99202e-05	Afu8g06080-T|Afu6g11620-T|Afu3g00740-T|Afu5g01272-T|Afu6g10460-T|Afu8g01240-T|Afu4g13960-T|Afu8g00420-T|Afu4g07710-T|Afu7g05460-T|Afu3g01155-T|Afu4g04260-T|Afu6g01990-T|Afu2g16370-T|Afu8g00100-T|Afu1g04530-T|Afu2g03590-T|Afu8g04050-T|Afu6g11260-T|Afu1g16210-T|Afu5g06560-T|Afu6g04570-T|Afu2g05910-T|Afu4g07845-T|Afu1g14140-T|Afu4g06690-T|Afu6g11750-T|Afu3g14010-T|Afu2g03610-T|Afu5g05690-T|Afu2g1225…	http://amigo.geneontology.org/cgi-bin/amigo/term_details?term=GO:1901576
endonucleolytic cleavage in ITS1 to separate SSU-rRNA from 5.8S rRNA and LSU-rRNA from tricistronic rRNA transcript (SSU-rRNA, 5.8S rRNA, LSU-rRNA)	Gene Ontology	GO:0000447	15	18	3.21212e-05	Afu2g03590-T|Afu2g12890-T|Afu4g05880-T|Afu6g13370-T|Afu3g04110-T|Afu1g04240-T|Afu7g04430-T|Afu6g14260-T|Afu3g13320-T|Afu3g11110-T|Afu1g04840-T|Afu6g06430-T|Afu3g13400-T|Afu8g04220-T|Afu3g06010-T	http://amigo.geneontology.org/cgi-bin/amigo/term_details?term=GO:0000447
ribonucleoprotein complex export from nucleus	Gene Ontology	GO:0071426	22	38	3.28726e-05	Afu1g05340-T|Afu2g10090-T|Afu4g08930-T|Afu4g04740-T|Afu8g03930-T|Afu7g04430-T|Afu7g04490-T|Afu5g06510-T|Afu2g11510-T|Afu2g16750-T|Afu1g04040-T|Afu1g04190-T|Afu3g11110-T|Afu1g05630-T|Afu1g13900-T|Afu5g06520-T|Afu1g12940-T|Afu6g12660-T|Afu1g06770-T|Afu3g13320-T|Afu7g01460-T|Afu6g12920-T	http://amigo.geneontology.org/cgi-bin/amigo/term_details?term=GO:0071426
ribosomal large subunit assembly	Gene Ontology	GO:0000027	16	21	3.76559e-05	Afu2g09210-T|Afu8g04790-T|Afu4g07730-T|Afu2g08480-T|Afu1g11130-T|Afu3g06580-T|Afu5g06510-T|Afu1g01990-T|Afu1g06230-T|Afu1g05080-T|Afu6g01990-T|Afu1g10760-T|Afu2g11850-T|Afu5g13470-T|Afu1g04040-T|Afu4g07570-T	http://amigo.geneontology.org/cgi-bin/amigo/term_details?term=GO:0000027
organic cyclic compound metabolic process	Gene Ontology	GO:1901360	289	1269	3.97664e-05	Afu2g06310-T|Afu8g06080-T|Afu8g00230-T|Afu1g04320-T|Afu5g01272-T|Afu8g01240-T|Afu2g15980-T|Afu5g09430-T|Afu8g00420-T|Afu3g06010-T|Afu3g01155-T|Afu4g04260-T|Afu6g01990-T|Afu1g15120-T|Afu1g06360-T|Afu8g00100-T|Afu6g10810-T|Afu2g03590-T|Afu8g04050-T|Afu1g14220-T|Afu1g16210-T|Afu5g06560-T|Afu6g04570-T|Afu1g13070-T|Afu7g04430-T|Afu4g06690-T|Afu6g11750-T|Afu3g14010-T|Afu2g03610-T|Afu5g05690-T|Afu2g1225…	http://amigo.geneontology.org/cgi-bin/amigo/term_details?term=GO:1901360
DNA replication	Gene Ontology	GO:0006260	29	62	4.3312e-05	Afu1g03920-T|Afu2g16600-T|Afu6g01990-T|Afu4g12210-T|Afu5g08110-T|Afu4g04390-T|Afu1g07530-T|Afu4g06690-T|Afu3g06580-T|Afu3g14010-T|Afu2g12250-T|Afu5g01870-T|Afu4g04745-T|Afu3g09560-T|Afu4g07970-T|Afu2g09010-T|Afu5g13370-T|Afu2g10730-T|Afu2g09060-T|Afu3g08300-T|Afu1g12940-T|Afu5g02520-T|Afu3g06060-T|Afu1g07320-T|Afu2g02660-T|Afu2g17050-T|Afu1g03410-T|Afu6g13160-T|Afu1g15310-T	http://amigo.geneontology.org/cgi-bin/amigo/term_details?term=GO:0006260
ribonucleoprotein complex localization	Gene Ontology	GO:0071166	22	39	4.41545e-05	Afu1g05340-T|Afu2g10090-T|Afu4g08930-T|Afu4g04740-T|Afu8g03930-T|Afu7g04430-T|Afu7g04490-T|Afu5g06510-T|Afu2g11510-T|Afu2g16750-T|Afu1g04040-T|Afu1g04190-T|Afu3g11110-T|Afu1g05630-T|Afu1g13900-T|Afu5g06520-T|Afu1g12940-T|Afu6g12660-T|Afu1g06770-T|Afu3g13320-T|Afu7g01460-T|Afu6g12920-T	http://amigo.geneontology.org/cgi-bin/amigo/term_details?term=GO:0071166
ribonucleoprotein complex assembly	Gene Ontology	GO:0022618	27	56	5.26175e-05	Afu2g17060-T|Afu4g07570-T|Afu1g01990-T|Afu2g08480-T|Afu6g01990-T|Afu2g10440-T|Afu2g09210-T|Afu3g06580-T|Afu3g06640-T|Afu1g11130-T|Afu7g04430-T|Afu7g04490-T|Afu5g06510-T|Afu2g11510-T|Afu1g04840-T|Afu5g13520-T|Afu5g13470-T|Afu1g04040-T|Afu1g06230-T|Afu1g05080-T|Afu3g11260-T|Afu4g07730-T|Afu3g13320-T|Afu8g04790-T|Afu1g10760-T|Afu2g11850-T|Afu5g01760-T	http://amigo.geneontology.org/cgi-bin/amigo/term_details?term=GO:0022618
biosynthetic process	Gene Ontology	GO:0009058	310	1382	5.3727e-05	Afu8g06080-T|Afu6g11620-T|Afu3g00740-T|Afu5g01272-T|Afu4g09150-T|Afu8g01240-T|Afu4g13960-T|Afu8g00420-T|Afu4g07710-T|Afu7g05460-T|Afu3g01155-T|Afu4g04260-T|Afu6g01990-T|Afu5g01740-T|Afu2g16370-T|Afu8g00100-T|Afu1g04530-T|Afu2g03590-T|Afu8g04050-T|Afu6g11260-T|Afu1g16210-T|Afu5g06560-T|Afu6g04570-T|Afu2g05910-T|Afu4g07845-T|Afu1g14140-T|Afu4g06690-T|Afu6g11750-T|Afu3g14010-T|Afu2g03610-T|Afu5g0569…	http://amigo.geneontology.org/cgi-bin/amigo/term_details?term=GO:0009058
ribonucleoprotein complex subunit organization	Gene Ontology	GO:0071826	27	57	6.65267e-05	Afu2g17060-T|Afu4g07570-T|Afu1g01990-T|Afu2g08480-T|Afu6g01990-T|Afu2g10440-T|Afu2g09210-T|Afu3g06580-T|Afu3g06640-T|Afu1g11130-T|Afu7g04430-T|Afu7g04490-T|Afu5g06510-T|Afu2g11510-T|Afu1g04840-T|Afu5g13520-T|Afu5g13470-T|Afu1g04040-T|Afu1g06230-T|Afu1g05080-T|Afu3g11260-T|Afu4g07730-T|Afu3g13320-T|Afu8g04790-T|Afu1g10760-T|Afu2g11850-T|Afu5g01760-T	http://amigo.geneontology.org/cgi-bin/amigo/term_details?term=GO:0071826
nucleic acid phosphodiester bond hydrolysis	Gene Ontology	GO:0090305	25	51	8.02173e-05	Afu2g06310-T|Afu3g09880-T|Afu6g06430-T|Afu8g04220-T|Afu3g05530-T|Afu2g03590-T|Afu7g04130-T|Afu7g00870-T|Afu7g04430-T|Afu7g04490-T|Afu1g04840-T|Afu1g04240-T|Afu6g04590-T|Afu4g05880-T|Afu6g13370-T|Afu3g04110-T|Afu3g11110-T|Afu3g13400-T|Afu3g06010-T|Afu2g12890-T|Afu3g06640-T|Afu6g14260-T|Afu1g02060-T|Afu3g13320-T|Afu2g13130-T	http://amigo.geneontology.org/cgi-bin/amigo/term_details?term=GO:0090305
RNA phosphodiester bond hydrolysis, endonucleolytic	Gene Ontology	GO:0090502	17	26	8.58922e-05	Afu2g06310-T|Afu2g03590-T|Afu2g12890-T|Afu4g05880-T|Afu3g06640-T|Afu6g13370-T|Afu3g04110-T|Afu1g04240-T|Afu7g04430-T|Afu6g14260-T|Afu3g13320-T|Afu3g11110-T|Afu1g04840-T|Afu6g06430-T|Afu3g13400-T|Afu8g04220-T|Afu3g06010-T	http://amigo.geneontology.org/cgi-bin/amigo/term_details?term=GO:0090502
DNA strand elongation	Gene Ontology	GO:0022616	14	18	9.86303e-05	Afu2g09060-T|Afu3g08300-T|Afu3g14010-T|Afu3g09560-T|Afu3g06060-T|Afu1g07320-T|Afu3g09050-T|Afu2g12250-T|Afu2g16600-T|Afu4g07970-T|Afu2g09010-T|Afu5g01870-T|Afu4g12210-T|Afu5g13370-T	http://amigo.geneontology.org/cgi-bin/amigo/term_details?term=GO:0022616
cellular metabolic process	Gene Ontology	GO:0044237	464	2202	0.000110662	Afu2g06310-T|Afu8g06080-T|Afu5g01272-T|Afu8g01240-T|Afu4g13960-T|Afu1g08810-T|Afu2g16370-T|Afu6g04570-T|Afu4g07845-T|Afu1g11530-T|Afu5g05690-T|Afu1g03110-T|Afu4g13170-T|Afu6g08590-T|Afu5g13470-T|Afu5g02760-T|Afu4g08110-T|Afu6g04510-T|Afu4g08410-T|Afu3g11110-T|Afu7g02130-T|Afu8g04050-T|Afu7g04860-T|Afu1g04040-T|Afu1g15620-T|Afu1g06340-T|Afu5g11985-T|Afu3g09600-T|Afu4g04270-T|Afu1g12490-T|Afu6g0890…	http://amigo.geneontology.org/cgi-bin/amigo/term_details?term=GO:0044237
organelle assembly	Gene Ontology	GO:0070925	30	70	0.000112734	Afu1g11130-T|Afu8g05680-T|Afu1g01990-T|Afu2g08480-T|Afu6g01990-T|Afu7g01400-T|Afu2g10440-T|Afu2g09210-T|Afu3g06580-T|Afu3g06640-T|Afu4g04740-T|Afu7g04430-T|Afu3g06330-T|Afu7g04490-T|Afu5g06510-T|Afu1g04840-T|Afu5g13520-T|Afu6g02670-T|Afu5g13470-T|Afu1g04040-T|Afu1g06230-T|Afu1g05080-T|Afu3g11260-T|Afu4g07730-T|Afu4g07570-T|Afu3g13320-T|Afu8g04790-T|Afu1g10760-T|Afu2g11850-T|Afu5g03130-T	http://amigo.geneontology.org/cgi-bin/amigo/term_details?term=GO:0070925
cellular aromatic compound metabolic process	Gene Ontology	GO:0006725	267	1181	0.000126328	Afu2g06310-T|Afu8g06080-T|Afu8g00230-T|Afu1g04320-T|Afu5g01272-T|Afu8g01240-T|Afu5g09430-T|Afu8g00420-T|Afu3g06010-T|Afu3g01155-T|Afu4g04260-T|Afu6g01990-T|Afu1g15120-T|Afu1g06360-T|Afu8g00100-T|Afu6g10810-T|Afu2g03590-T|Afu8g04050-T|Afu1g14220-T|Afu1g16210-T|Afu5g06560-T|Afu6g04570-T|Afu1g13070-T|Afu7g04430-T|Afu1g11530-T|Afu6g11750-T|Afu3g14010-T|Afu2g03610-T|Afu5g05690-T|Afu2g12250-T|Afu6g0643…	http://amigo.geneontology.org/cgi-bin/amigo/term_details?term=GO:0006725
organic acid biosynthetic process	Gene Ontology	GO:0016053	59	186	0.000132297	Afu8g00420-T|Afu3g12120-T|Afu3g00740-T|Afu1g12490-T|Afu4g10460-T|Afu2g11300-T|Afu1g13140-T|Afu5g08120-T|Afu3g08660-T|Afu8g00370-T|Afu1g12530-T|Afu1g07380-T|Afu4g08760-T|Afu2g17930-T|Afu5g04250-T|Afu2g14497-T|Afu4g07360-T|Afu8g04340-T|Afu8g00380-T|Afu5g08890-T|Afu8g00470-T|Afu5g05690-T|Afu2g10450-T|Afu7g04070-T|Afu6g03660-T|Afu7g01000-T|Afu8g00500-T|Afu2g14210-T|Afu2g12470-T|Afu5g02760-T|Afu6g1206…	http://amigo.geneontology.org/cgi-bin/amigo/term_details?term=GO:0016053
RNA phosphodiester bond hydrolysis	Gene Ontology	GO:0090501	22	44	0.000169908	Afu2g06310-T|Afu3g09880-T|Afu6g06430-T|Afu8g04220-T|Afu2g03590-T|Afu3g06640-T|Afu7g00870-T|Afu7g04430-T|Afu7g04490-T|Afu1g04840-T|Afu1g04240-T|Afu6g04590-T|Afu4g05880-T|Afu6g13370-T|Afu3g04110-T|Afu3g11110-T|Afu3g13400-T|Afu3g06010-T|Afu2g12890-T|Afu6g14260-T|Afu3g13320-T|Afu2g13130-T	http://amigo.geneontology.org/cgi-bin/amigo/term_details?term=GO:0090501
DNA strand elongation involved in DNA replication	Gene Ontology	GO:0006271	13	17	0.000196571	Afu2g09060-T|Afu3g08300-T|Afu3g14010-T|Afu3g09560-T|Afu3g06060-T|Afu1g07320-T|Afu2g16600-T|Afu2g12250-T|Afu4g07970-T|Afu2g09010-T|Afu5g01870-T|Afu4g12210-T|Afu5g13370-T	http://amigo.geneontology.org/cgi-bin/amigo/term_details?term=GO:0006271
ribosomal subunit export from nucleus	Gene Ontology	GO:0000054	13	18	0.00029204	Afu5g06520-T|Afu4g08930-T|Afu4g04740-T|Afu8g03930-T|Afu7g04430-T|Afu7g04490-T|Afu5g06510-T|Afu2g11510-T|Afu3g11110-T|Afu2g16750-T|Afu6g12920-T|Afu1g04040-T|Afu1g05630-T	http://amigo.geneontology.org/cgi-bin/amigo/term_details?term=GO:0000054
establishment of ribosome localization	Gene Ontology	GO:0033753	13	18	0.00029204	Afu5g06520-T|Afu4g08930-T|Afu4g04740-T|Afu8g03930-T|Afu7g04430-T|Afu7g04490-T|Afu5g06510-T|Afu2g11510-T|Afu3g11110-T|Afu2g16750-T|Afu6g12920-T|Afu1g04040-T|Afu1g05630-T	http://amigo.geneontology.org/cgi-bin/amigo/term_details?term=GO:0033753
ribosome localization	Gene Ontology	GO:0033750	13	18	0.00029204	Afu5g06520-T|Afu4g08930-T|Afu4g04740-T|Afu8g03930-T|Afu7g04430-T|Afu7g04490-T|Afu5g06510-T|Afu2g11510-T|Afu3g11110-T|Afu2g16750-T|Afu6g12920-T|Afu1g04040-T|Afu1g05630-T	http://amigo.geneontology.org/cgi-bin/amigo/term_details?term=GO:0033750
gene expression	Gene Ontology	GO:0010467	205	886	0.000298484	Afu2g06310-T|Afu8g00420-T|Afu5g01272-T|Afu8g00100-T|Afu8g01240-T|Afu3g06010-T|Afu7g05460-T|Afu4g04260-T|Afu6g01990-T|Afu2g16370-T|Afu1g04530-T|Afu2g03590-T|Afu6g11260-T|Afu1g16210-T|Afu6g04570-T|Afu1g11130-T|Afu4g07845-T|Afu7g04430-T|Afu6g11750-T|Afu3g11030-T|Afu1g03110-T|Afu6g06430-T|Afu4g13170-T|Afu1g14180-T|Afu5g13470-T|Afu1g02570-T|Afu4g05880-T|Afu4g08110-T|Afu7g03690-T|Afu6g04510-T|Afu1g0933…	http://amigo.geneontology.org/cgi-bin/amigo/term_details?term=GO:0010467
heterocycle metabolic process	Gene Ontology	GO:0046483	264	1190	0.000389512	Afu2g06310-T|Afu8g06080-T|Afu8g00230-T|Afu1g04320-T|Afu5g01272-T|Afu8g01240-T|Afu5g09430-T|Afu8g00420-T|Afu3g06010-T|Afu3g01155-T|Afu4g04260-T|Afu6g01990-T|Afu1g15120-T|Afu1g06360-T|Afu8g00100-T|Afu2g03590-T|Afu8g04050-T|Afu1g16210-T|Afu5g06560-T|Afu6g04570-T|Afu1g13070-T|Afu7g04430-T|Afu4g06690-T|Afu6g11750-T|Afu3g14010-T|Afu2g03610-T|Afu2g12250-T|Afu6g06430-T|Afu1g14180-T|Afu5g13470-T|Afu6g1206…	http://amigo.geneontology.org/cgi-bin/amigo/term_details?term=GO:0046483
rRNA export from nucleus	Gene Ontology	GO:0006407	9	9	0.000536083	Afu2g10090-T|Afu1g06770-T|Afu4g04740-T|Afu7g04490-T|Afu1g05340-T|Afu3g13320-T|Afu1g05630-T|Afu7g01460-T|Afu6g12660-T	http://amigo.geneontology.org/cgi-bin/amigo/term_details?term=GO:0006407
rRNA transport	Gene Ontology	GO:0051029	9	9	0.000536083	Afu2g10090-T|Afu1g06770-T|Afu4g04740-T|Afu7g04490-T|Afu1g05340-T|Afu3g13320-T|Afu1g05630-T|Afu7g01460-T|Afu6g12660-T	http://amigo.geneontology.org/cgi-bin/amigo/term_details?term=GO:0051029
cytoplasmic translation	Gene Ontology	GO:0002181	17	32	0.000538872	Afu2g10100-T|Afu5g06360-T|Afu1g12940-T|Afu4g07660-T|Afu6g04570-T|Afu1g11130-T|Afu8g03930-T|Afu6g13250-T|Afu1g09330-T|Afu3g08640-T|Afu3g13320-T|Afu7g03980-T|Afu1g05080-T|Afu1g09100-T|Afu1g03110-T|Afu1g06830-T|Afu4g07435-T	http://amigo.geneontology.org/cgi-bin/amigo/term_details?term=GO:0002181
cellular nitrogen compound biosynthetic process	Gene Ontology	GO:0044271	204	895	0.000605433	Afu8g00420-T|Afu6g11620-T|Afu5g01272-T|Afu6g10460-T|Afu8g01240-T|Afu7g05460-T|Afu4g04260-T|Afu2g07460-T|Afu2g16370-T|Afu8g00100-T|Afu2g03590-T|Afu6g11260-T|Afu1g16210-T|Afu5g06560-T|Afu6g04570-T|Afu1g11130-T|Afu4g07845-T|Afu4g06690-T|Afu6g11750-T|Afu2g03610-T|Afu1g03110-T|Afu4g13170-T|Afu6g12060-T|Afu6g12580-T|Afu8g00200-T|Afu4g08110-T|Afu7g03690-T|Afu6g04510-T|Afu4g08410-T|Afu4g08010-T|Afu1g0933…	http://amigo.geneontology.org/cgi-bin/amigo/term_details?term=GO:0044271
endonucleolytic cleavage to generate mature 5'-end of SSU-rRNA from (SSU-rRNA, 5.8S rRNA, LSU-rRNA)	Gene Ontology	GO:0000472	10	12	0.000684437	Afu2g12890-T|Afu4g05880-T|Afu6g13370-T|Afu6g06430-T|Afu1g04240-T|Afu3g11110-T|Afu1g04840-T|Afu3g13400-T|Afu8g04220-T|Afu3g06010-T	http://amigo.geneontology.org/cgi-bin/amigo/term_details?term=GO:0000472
rRNA 5'-end processing	Gene Ontology	GO:0000967	10	12	0.000684437	Afu2g12890-T|Afu4g05880-T|Afu6g13370-T|Afu6g06430-T|Afu1g04240-T|Afu3g11110-T|Afu1g04840-T|Afu3g13400-T|Afu8g04220-T|Afu3g06010-T	http://amigo.geneontology.org/cgi-bin/amigo/term_details?term=GO:0000967
RNA 5'-end processing	Gene Ontology	GO:0000966	10	12	0.000684437	Afu2g12890-T|Afu4g05880-T|Afu6g13370-T|Afu6g06430-T|Afu1g04240-T|Afu3g11110-T|Afu1g04840-T|Afu3g13400-T|Afu8g04220-T|Afu3g06010-T	http://amigo.geneontology.org/cgi-bin/amigo/term_details?term=GO:0000966
endonucleolytic cleavage in 5'-ETS of tricistronic rRNA transcript (SSU-rRNA, 5.8S rRNA, LSU-rRNA)	Gene Ontology	GO:0000480	10	12	0.000684437	Afu2g12890-T|Afu4g05880-T|Afu6g13370-T|Afu1g04240-T|Afu6g14260-T|Afu3g11110-T|Afu1g04840-T|Afu3g13400-T|Afu8g04220-T|Afu3g06010-T	http://amigo.geneontology.org/cgi-bin/amigo/term_details?term=GO:0000480
ncRNA 5'-end processing	Gene Ontology	GO:0034471	10	12	0.000684437	Afu2g12890-T|Afu4g05880-T|Afu6g13370-T|Afu6g06430-T|Afu1g04240-T|Afu3g11110-T|Afu1g04840-T|Afu3g13400-T|Afu8g04220-T|Afu3g06010-T	http://amigo.geneontology.org/cgi-bin/amigo/term_details?term=GO:0034471
nucleobase-containing compound metabolic process	Gene Ontology	GO:0006139	234	1053	0.000801528	Afu2g06310-T|Afu8g00420-T|Afu6g11620-T|Afu1g04320-T|Afu5g01272-T|Afu8g01240-T|Afu3g06010-T|Afu3g01155-T|Afu4g04260-T|Afu6g01990-T|Afu1g15120-T|Afu1g06360-T|Afu8g00100-T|Afu2g03590-T|Afu8g04050-T|Afu1g16210-T|Afu5g06560-T|Afu6g04570-T|Afu1g13070-T|Afu7g04430-T|Afu4g06690-T|Afu6g11750-T|Afu3g14010-T|Afu2g03610-T|Afu2g12250-T|Afu6g06430-T|Afu1g14180-T|Afu5g13470-T|Afu1g02570-T|Afu2g01980-T|Afu4g0588…	http://amigo.geneontology.org/cgi-bin/amigo/term_details?term=GO:0006139
maturation of LSU-rRNA from tricistronic rRNA transcript (SSU-rRNA, 5.8S rRNA, LSU-rRNA)	Gene Ontology	GO:0000463	12	18	0.00083088	Afu2g06310-T|Afu2g17060-T|Afu5g03870-T|Afu6g08900-T|Afu5g12100-T|Afu8g04790-T|Afu4g07570-T|Afu4g13330-T|Afu6g01990-T|Afu5g01760-T|Afu6g04260-T|Afu2g13980-T	http://amigo.geneontology.org/cgi-bin/amigo/term_details?term=GO:0000463
single-organism biosynthetic process	Gene Ontology	GO:0044711	140	584	0.000867314	Afu8g06080-T|Afu3g12120-T|Afu3g00740-T|Afu6g10460-T|Afu8g01240-T|Afu4g13960-T|Afu8g00420-T|Afu4g04260-T|Afu3g08270-T|Afu1g14140-T|Afu4g06690-T|Afu2g03610-T|Afu5g05690-T|Afu4g11500-T|Afu5g02760-T|Afu6g12060-T|Afu6g12580-T|Afu7g05920-T|Afu8g00200-T|Afu6g00660-T|Afu3g15090-T|Afu1g15780-T|Afu1g17190-T|Afu2g07520-T|Afu2g14210-T|Afu1g15000-T|Afu7g03940-T|Afu6g03670-T|Afu4g12600-T|Afu4g04270-T|Afu1g1249…	http://amigo.geneontology.org/cgi-bin/amigo/term_details?term=GO:0044711
eukaryotic translation initiation factor 3 complex, eIF3e	Gene Ontology	GO:0071540	8	8	0.00110581	Afu2g09870-T|Afu1g05200-T|Afu1g02030-T|Afu2g14670-T|Afu3g11360-T|Afu1g09330-T|Afu3g08640-T|Afu4g03860-T	http://amigo.geneontology.org/cgi-bin/amigo/term_details?term=GO:0071540
DNA metabolic process	Gene Ontology	GO:0006259	56	193	0.00116526	Afu7g04590-T|Afu1g03920-T|Afu2g03910-T|Afu4g11180-T|Afu2g16600-T|Afu6g01990-T|Afu4g12210-T|Afu5g08110-T|Afu1g15120-T|Afu1g06360-T|Afu1g07530-T|Afu3g05530-T|Afu4g04390-T|Afu7g04783-T|Afu1g02060-T|Afu4g07360-T|Afu3g02390-T|Afu2g09120-T|Afu3g09850-T|Afu3g06580-T|Afu3g14010-T|Afu3g09050-T|Afu2g12250-T|Afu6g08350-T|Afu7g03890-T|Afu5g01870-T|Afu4g10630-T|Afu4g04745-T|Afu1g13010-T|Afu7g03690-T|Afu6g0451…	http://amigo.geneontology.org/cgi-bin/amigo/term_details?term=GO:0006259
DNA replication initiation	Gene Ontology	GO:0006270	12	19	0.0011712	Afu2g10730-T|Afu2g09060-T|Afu1g07530-T|Afu3g09560-T|Afu5g02520-T|Afu5g08110-T|Afu3g06580-T|Afu3g14010-T|Afu1g03920-T|Afu2g17050-T|Afu6g01990-T|Afu1g15310-T	http://amigo.geneontology.org/cgi-bin/amigo/term_details?term=GO:0006270
organic substance metabolic process	Gene Ontology	GO:0071704	494	2433	0.0012204	Afu2g06310-T|Afu8g06080-T|Afu4g13450-T|Afu8g01240-T|Afu4g13960-T|Afu1g08810-T|Afu2g16370-T|Afu6g04570-T|Afu4g07845-T|Afu5g05690-T|Afu1g03110-T|Afu4g13170-T|Afu6g08590-T|Afu5g13470-T|Afu5g02760-T|Afu8g01410-T|Afu4g08110-T|Afu6g04510-T|Afu4g08410-T|Afu3g11110-T|Afu7g02130-T|Afu8g04050-T|Afu7g04860-T|Afu1g04040-T|Afu1g15620-T|Afu1g06340-T|Afu5g11985-T|Afu3g09600-T|Afu4g04270-T|Afu1g12490-T|Afu6g0890…	http://amigo.geneontology.org/cgi-bin/amigo/term_details?term=GO:0071704
rRNA modification	Gene Ontology	GO:0000154	9	11	0.00139112	Afu5g05710-T|Afu1g13460-T|Afu7g04860-T|Afu4g13450-T|Afu5g12100-T|Afu1g16730-T|Afu1g14220-T|Afu3g06010-T|Afu5g01760-T	http://amigo.geneontology.org/cgi-bin/amigo/term_details?term=GO:0000154
maturation of LSU-rRNA	Gene Ontology	GO:0000470	12	20	0.0016193	Afu2g06310-T|Afu2g17060-T|Afu5g03870-T|Afu6g08900-T|Afu5g12100-T|Afu8g04790-T|Afu4g07570-T|Afu4g13330-T|Afu6g01990-T|Afu5g01760-T|Afu6g04260-T|Afu2g13980-T	http://amigo.geneontology.org/cgi-bin/amigo/term_details?term=GO:0000470
nucleic acid metabolic process	Gene Ontology	GO:0090304	198	887	0.00172968	Afu2g06310-T|Afu8g00420-T|Afu5g01272-T|Afu8g00100-T|Afu8g01240-T|Afu3g06010-T|Afu3g01155-T|Afu4g04260-T|Afu6g01990-T|Afu1g15120-T|Afu1g06360-T|Afu2g03590-T|Afu8g04050-T|Afu1g16210-T|Afu6g04570-T|Afu1g13070-T|Afu7g04430-T|Afu4g06690-T|Afu6g11750-T|Afu3g14010-T|Afu3g09880-T|Afu2g12250-T|Afu6g06430-T|Afu1g14180-T|Afu5g13470-T|Afu1g02570-T|Afu2g01980-T|Afu4g05880-T|Afu7g03690-T|Afu6g04510-T|Afu4g0801…	http://amigo.geneontology.org/cgi-bin/amigo/term_details?term=GO:0090304
small molecule metabolic process	Gene Ontology	GO:0044281	154	667	0.0018523	Afu8g00420-T|Afu8g00230-T|Afu3g00740-T|Afu8g00100-T|Afu8g01240-T|Afu4g13960-T|Afu3g12120-T|Afu4g04260-T|Afu6g10810-T|Afu1g16210-T|Afu2g11300-T|Afu3g08270-T|Afu4g06690-T|Afu2g03610-T|Afu5g05690-T|Afu4g11500-T|Afu4g13170-T|Afu3g09320-T|Afu5g02760-T|Afu6g12060-T|Afu6g12580-T|Afu1g12840-T|Afu7g05920-T|Afu8g00200-T|Afu6g00660-T|Afu3g15090-T|Afu7g01010-T|Afu1g10130-T|Afu2g14210-T|Afu5g10420-T|Afu1g1500…	http://amigo.geneontology.org/cgi-bin/amigo/term_details?term=GO:0044281
mitotic DNA replication	Gene Ontology	GO:1902969	10	15	0.00224546	Afu2g10730-T|Afu2g09060-T|Afu3g09560-T|Afu3g06060-T|Afu1g07320-T|Afu2g02660-T|Afu2g09010-T|Afu1g15310-T|Afu4g12210-T|Afu5g13370-T	http://amigo.geneontology.org/cgi-bin/amigo/term_details?term=GO:1902969
pre-replicative complex assembly involved in nuclear cell cycle DNA replication	Gene Ontology	GO:0006267	7	7	0.00229568	Afu2g09060-T|Afu5g02520-T|Afu5g08110-T|Afu3g06580-T|Afu3g14010-T|Afu2g17050-T|Afu6g01990-T	http://amigo.geneontology.org/cgi-bin/amigo/term_details?term=GO:0006267
pre-replicative complex assembly	Gene Ontology	GO:0036388	7	7	0.00229568	Afu2g09060-T|Afu5g02520-T|Afu5g08110-T|Afu3g06580-T|Afu3g14010-T|Afu2g17050-T|Afu6g01990-T	http://amigo.geneontology.org/cgi-bin/amigo/term_details?term=GO:0036388
pre-replicative complex assembly involved in cell cycle DNA replication	Gene Ontology	GO:1902299	7	7	0.00229568	Afu2g09060-T|Afu5g02520-T|Afu5g08110-T|Afu3g06580-T|Afu3g14010-T|Afu2g17050-T|Afu6g01990-T	http://amigo.geneontology.org/cgi-bin/amigo/term_details?term=GO:1902299
organic acid metabolic process	Gene Ontology	GO:0006082	97	392	0.00237047	Afu8g00420-T|Afu3g12120-T|Afu3g00740-T|Afu8g00100-T|Afu4g13960-T|Afu6g10810-T|Afu1g16210-T|Afu2g11300-T|Afu3g08270-T|Afu5g05690-T|Afu4g13170-T|Afu3g09320-T|Afu5g02760-T|Afu6g12060-T|Afu6g12580-T|Afu1g12840-T|Afu7g05920-T|Afu5g10420-T|Afu1g15000-T|Afu6g03670-T|Afu2g04980-T|Afu1g12490-T|Afu3g06530-T|Afu3g08660-T|Afu1g07380-T|Afu5g08890-T|Afu4g10620-T|Afu5g04250-T|Afu5g09450-T|Afu5g02930-T|Afu6g1066…	http://amigo.geneontology.org/cgi-bin/amigo/term_details?term=GO:0006082
translational elongation	Gene Ontology	GO:0006414	11	19	0.0030907	Afu2g10100-T|Afu7g01460-T|Afu4g08110-T|Afu6g04570-T|Afu8g03930-T|Afu6g13250-T|Afu7g05660-T|Afu1g05080-T|Afu1g09440-T|Afu1g12170-T|Afu1g06830-T	http://amigo.geneontology.org/cgi-bin/amigo/term_details?term=GO:0006414
nucleocytoplasmic transport	Gene Ontology	GO:0006913	28	82	0.00313566	Afu8g05680-T|Afu1g13140-T|Afu1g05340-T|Afu1g04040-T|Afu2g10090-T|Afu4g08930-T|Afu4g04740-T|Afu8g03930-T|Afu7g04430-T|Afu7g04490-T|Afu5g06510-T|Afu2g11510-T|Afu2g16750-T|Afu6g08350-T|Afu6g12660-T|Afu1g04190-T|Afu2g08670-T|Afu3g11110-T|Afu1g05630-T|Afu1g13900-T|Afu5g06520-T|Afu5g01180-T|Afu1g12940-T|Afu1g06790-T|Afu1g06770-T|Afu3g13320-T|Afu7g01460-T|Afu6g12920-T	http://amigo.geneontology.org/cgi-bin/amigo/term_details?term=GO:0006913
cellular component organization or biogenesis	Gene Ontology	GO:0071840	201	916	0.00313734	Afu2g06310-T|Afu3g09370-T|Afu6g10460-T|Afu6g06430-T|Afu2g03150-T|Afu1g11860-T|Afu6g01990-T|Afu2g01480-T|Afu1g15120-T|Afu2g03590-T|Afu3g14010-T|Afu6g04570-T|Afu1g11130-T|Afu1g13070-T|Afu2g03870-T|Afu3g06330-T|Afu6g03820-T|Afu3g09880-T|Afu2g15130-T|Afu2g16750-T|Afu4g13170-T|Afu5g13470-T|Afu4g05880-T|Afu1g02550-T|Afu4g08110-T|Afu7g03690-T|Afu1g14580-T|Afu1g06880-T|Afu3g11360-T|Afu2g02150-T|Afu4g0801…	http://amigo.geneontology.org/cgi-bin/amigo/term_details?term=GO:0071840
secondary metabolic process	Gene Ontology	GO:0019748	56	204	0.00324408	Afu3g12120-T|Afu4g09150-T|Afu8g06080-T|Afu4g14770-T|Afu4g14830-T|Afu1g12490-T|Afu4g14380-T|Afu1g13140-T|Afu8g01240-T|Afu4g14810-T|Afu8g00420-T|Afu6g13990-T|Afu8g00940-T|Afu8g00380-T|Afu6g12180-T|Afu2g17540-T|Afu6g02910-T|Afu8g00540-T|Afu6g12090-T|Afu8g00390-T|Afu8g00230-T|Afu8g00470-T|Afu4g14790-T|Afu8g00200-T|Afu5g06800-T|Afu8g00170-T|Afu4g14840-T|Afu6g12060-T|Afu6g09630-T|Afu8g00370-T|Afu8g0062…	http://amigo.geneontology.org/cgi-bin/amigo/term_details?term=GO:0019748
nuclear transport	Gene Ontology	GO:0051169	28	83	0.00360257	Afu8g05680-T|Afu1g13140-T|Afu1g05340-T|Afu1g04040-T|Afu2g10090-T|Afu4g08930-T|Afu4g04740-T|Afu8g03930-T|Afu7g04430-T|Afu7g04490-T|Afu5g06510-T|Afu2g11510-T|Afu2g16750-T|Afu6g08350-T|Afu6g12660-T|Afu1g04190-T|Afu2g08670-T|Afu3g11110-T|Afu1g05630-T|Afu1g13900-T|Afu5g06520-T|Afu5g01180-T|Afu1g12940-T|Afu1g06790-T|Afu1g06770-T|Afu3g13320-T|Afu7g01460-T|Afu6g12920-T	http://amigo.geneontology.org/cgi-bin/amigo/term_details?term=GO:0051169
carboxylic acid biosynthetic process	Gene Ontology	GO:0046394	35	114	0.00440492	Afu3g12120-T|Afu3g00740-T|Afu5g08890-T|Afu2g11300-T|Afu5g08120-T|Afu3g08660-T|Afu3g04220-T|Afu1g12530-T|Afu1g07380-T|Afu2g17930-T|Afu5g04250-T|Afu2g14497-T|Afu4g07360-T|Afu8g04340-T|Afu5g05690-T|Afu6g07430-T|Afu7g01000-T|Afu2g12470-T|Afu5g02760-T|Afu2g04310-T|Afu4g13960-T|Afu6g04820-T|Afu4g10460-T|Afu2g08670-T|Afu1g15780-T|Afu6g02910-T|Afu2g11540-T|Afu2g07520-T|Afu1g15000-T|Afu6g03670-T|Afu1g1457…	http://amigo.geneontology.org/cgi-bin/amigo/term_details?term=GO:0046394
pyrimidine nucleotide metabolic process	Gene Ontology	GO:0006220	9	14	0.00441651	Afu8g00850-T|Afu5g12350-T|Afu1g02890-T|Afu7g05210-T|Afu4g06690-T|Afu2g08360-T|Afu7g04990-T|Afu5g03460-T|Afu4g04270-T	http://amigo.geneontology.org/cgi-bin/amigo/term_details?term=GO:0006220
metabolic process	Gene Ontology	GO:0008152	613	3127	0.00445432	Afu2g06310-T|Afu8g06080-T|Afu4g13450-T|Afu4g14830-T|Afu8g01240-T|Afu4g13960-T|Afu1g08810-T|Afu4g12730-T|Afu2g16370-T|Afu6g04570-T|Afu4g07845-T|Afu1g11530-T|Afu1g04150-T|Afu1g03110-T|Afu4g13170-T|Afu6g08590-T|Afu5g13470-T|Afu5g02760-T|Afu8g01410-T|Afu4g08110-T|Afu6g04510-T|Afu4g08410-T|Afu3g11110-T|Afu7g02130-T|Afu7g06610-T|Afu8g00220-T|Afu2g09060-T|Afu7g04860-T|Afu6g03290-T|Afu1g04040-T|Afu7g0610…	http://amigo.geneontology.org/cgi-bin/amigo/term_details?term=GO:0008152
alkaloid metabolic process	Gene Ontology	GO:0009820	12	24	0.005016	Afu3g14110-T|Afu8g00620-T|Afu2g17990-T|Afu8g00230-T|Afu2g17960-T|Afu8g00250-T|Afu6g13990-T|Afu6g12070-T|Afu8g00200-T|Afu8g00170-T|Afu4g14840-T|Afu6g12060-T	http://amigo.geneontology.org/cgi-bin/amigo/term_details?term=GO:0009820
monocarboxylic acid biosynthetic process	Gene Ontology	GO:0072330	18	46	0.00541075	Afu3g00740-T|Afu6g03660-T|Afu7g05920-T|Afu6g04820-T|Afu2g17930-T|Afu3g12120-T|Afu2g11540-T|Afu2g14497-T|Afu4g13960-T|Afu6g03670-T|Afu2g08670-T|Afu1g12530-T|Afu2g00320-T|Afu6g07430-T|Afu3g04220-T|Afu7g01000-T|Afu2g07520-T|Afu5g02760-T	http://amigo.geneontology.org/cgi-bin/amigo/term_details?term=GO:0072330
RNA modification	Gene Ontology	GO:0009451	19	50	0.00557292	Afu5g05710-T|Afu1g14630-T|Afu1g07570-T|Afu5g01850-T|Afu6g04510-T|Afu7g04860-T|Afu4g13450-T|Afu4g12140-T|Afu5g12100-T|Afu2g16360-T|Afu1g13880-T|Afu4g04260-T|Afu1g14180-T|Afu1g16730-T|Afu1g14770-T|Afu1g14220-T|Afu1g13460-T|Afu3g06010-T|Afu5g01760-T	http://amigo.geneontology.org/cgi-bin/amigo/term_details?term=GO:0009451
RNA export from nucleus	Gene Ontology	GO:0006405	12	25	0.00642213	Afu4g04740-T|Afu2g10090-T|Afu1g04190-T|Afu1g12940-T|Afu7g04490-T|Afu1g05340-T|Afu3g13320-T|Afu1g05630-T|Afu7g01460-T|Afu1g06770-T|Afu1g13900-T|Afu6g12660-T	http://amigo.geneontology.org/cgi-bin/amigo/term_details?term=GO:0006405
protein-DNA complex assembly	Gene Ontology	GO:0065004	18	47	0.00644982	Afu3g14010-T|Afu6g04660-T|Afu2g09060-T|Afu3g06070-T|Afu1g13780-T|Afu5g06080-T|Afu6g04100-T|Afu5g02520-T|Afu5g08110-T|Afu3g06580-T|Afu5g02910-T|Afu2g17050-T|Afu2g06200-T|Afu6g01990-T|Afu3g11030-T|Afu3g06330-T|Afu5g03130-T|Afu1g15310-T	http://amigo.geneontology.org/cgi-bin/amigo/term_details?term=GO:0065004
DNA recombination	Gene Ontology	GO:0006310	21	59	0.00670729	Afu2g10730-T|Afu2g09060-T|Afu2g03910-T|Afu1g13010-T|Afu1g12940-T|Afu6g04510-T|Afu3g02390-T|Afu4g07230-T|Afu5g06080-T|Afu3g09560-T|Afu2g10500-T|Afu3g09850-T|Afu4g04390-T|Afu1g02060-T|Afu3g09050-T|Afu4g12310-T|Afu5g02520-T|Afu2g09010-T|Afu1g15120-T|Afu1g06360-T|Afu3g14010-T	http://amigo.geneontology.org/cgi-bin/amigo/term_details?term=GO:0006310
organic hydroxy compound biosynthetic process	Gene Ontology	GO:1901617	32	106	0.00766741	Afu8g00230-T|Afu1g12490-T|Afu8g01240-T|Afu2g03700-T|Afu8g00940-T|Afu2g17540-T|Afu7g01220-T|Afu2g11550-T|Afu4g14770-T|Afu4g07130-T|Afu1g04720-T|Afu8g00200-T|Afu4g11500-T|Afu4g14840-T|Afu4g03630-T|Afu6g12060-T|Afu8g00370-T|Afu8g00620-T|Afu2g17990-T|Afu5g06800-T|Afu2g01290-T|Afu1g17190-T|Afu6g12070-T|Afu6g13990-T|Afu7g01010-T|Afu2g07680-T|Afu5g09640-T|Afu8g00250-T|Afu2g17530-T|Afu4g00220-T|Afu1g0319…	http://amigo.geneontology.org/cgi-bin/amigo/term_details?term=GO:1901617
establishment of organelle localization	Gene Ontology	GO:0051656	20	56	0.00780146	Afu5g06520-T|Afu4g04740-T|Afu3g09370-T|Afu5g06510-T|Afu1g13140-T|Afu6g08530-T|Afu7g04430-T|Afu8g03930-T|Afu7g00250-T|Afu7g04490-T|Afu4g13390-T|Afu2g11510-T|Afu3g11110-T|Afu2g16750-T|Afu3g10720-T|Afu6g12920-T|Afu4g08930-T|Afu1g04040-T|Afu6g08660-T|Afu1g05630-T	http://amigo.geneontology.org/cgi-bin/amigo/term_details?term=GO:0051656
indole alkaloid metabolic process	Gene Ontology	GO:0035834	9	16	0.00831974	Afu8g00230-T|Afu2g17960-T|Afu8g00250-T|Afu6g13990-T|Afu6g12070-T|Afu8g00200-T|Afu8g00170-T|Afu4g14840-T|Afu6g12060-T	http://amigo.geneontology.org/cgi-bin/amigo/term_details?term=GO:0035834
indole alkaloid biosynthetic process	Gene Ontology	GO:0035835	9	16	0.00831974	Afu8g00230-T|Afu2g17960-T|Afu8g00250-T|Afu6g13990-T|Afu6g12070-T|Afu8g00200-T|Afu8g00170-T|Afu4g14840-T|Afu6g12060-T	http://amigo.geneontology.org/cgi-bin/amigo/term_details?term=GO:0035835
maintenance of DNA repeat elements	Gene Ontology	GO:0043570	7	10	0.0085927	Afu3g05530-T|Afu3g09850-T|Afu6g08530-T|Afu3g09050-T|Afu2g02660-T|Afu6g08350-T|Afu4g10630-T	http://amigo.geneontology.org/cgi-bin/amigo/term_details?term=GO:0043570
cellular macromolecule metabolic process	Gene Ontology	GO:0044260	293	1425	0.00886364	Afu2g06310-T|Afu8g00420-T|Afu5g01272-T|Afu1g04320-T|Afu8g00100-T|Afu8g01240-T|Afu5g09430-T|Afu1g11290-T|Afu7g05460-T|Afu3g01155-T|Afu4g04260-T|Afu4g10800-T|Afu6g01990-T|Afu4g14590-T|Afu1g15120-T|Afu1g06360-T|Afu5g01740-T|Afu1g04530-T|Afu2g03590-T|Afu6g11260-T|Afu1g16210-T|Afu6g04570-T|Afu1g11130-T|Afu4g07845-T|Afu1g14140-T|Afu7g04430-T|Afu4g06690-T|Afu6g11750-T|Afu3g14010-T|Afu2g08480-T|Afu2g1225…	http://amigo.geneontology.org/cgi-bin/amigo/term_details?term=GO:0044260
aromatic amino acid family metabolic process	Gene Ontology	GO:0009072	13	30	0.00892519	Afu6g10810-T|Afu6g12580-T|Afu5g05690-T|Afu4g09830-T|Afu2g13250-T|Afu1g02110-T|Afu1g13090-T|Afu4g09840-T|Afu2g10450-T|Afu4g08760-T|Afu7g04070-T|Afu4g10620-T|Afu5g02850-T	http://amigo.geneontology.org/cgi-bin/amigo/term_details?term=GO:0009072
RNA metabolic process	Gene Ontology	GO:0016070	167	768	0.00920225	Afu2g06310-T|Afu8g00420-T|Afu5g01272-T|Afu8g00100-T|Afu8g01240-T|Afu3g06010-T|Afu4g04260-T|Afu6g01990-T|Afu2g03590-T|Afu1g16210-T|Afu6g04570-T|Afu1g13070-T|Afu7g04430-T|Afu6g11750-T|Afu3g09880-T|Afu6g06430-T|Afu1g14180-T|Afu5g13470-T|Afu1g02570-T|Afu2g01980-T|Afu4g05880-T|Afu7g03690-T|Afu6g04510-T|Afu8g04050-T|Afu8g07360-T|Afu4g07970-T|Afu2g09010-T|Afu8g07110-T|Afu1g12940-T|Afu1g13780-T|Afu7g0486…	http://amigo.geneontology.org/cgi-bin/amigo/term_details?term=GO:0016070
primary metabolic process	Gene Ontology	GO:0044238	430	2162	0.00977621	Afu2g06310-T|Afu5g01272-T|Afu8g01240-T|Afu2g16370-T|Afu6g04570-T|Afu4g07845-T|Afu5g05690-T|Afu1g03110-T|Afu4g13170-T|Afu2g02750-T|Afu5g13470-T|Afu5g02760-T|Afu8g01410-T|Afu4g08110-T|Afu6g04510-T|Afu4g08410-T|Afu3g11110-T|Afu7g02130-T|Afu8g04050-T|Afu7g04860-T|Afu1g04040-T|Afu1g15620-T|Afu1g06340-T|Afu5g11985-T|Afu3g09600-T|Afu4g04270-T|Afu1g12490-T|Afu6g08900-T|Afu2g03700-T|Afu3g00650-T|Afu5g0945…	http://amigo.geneontology.org/cgi-bin/amigo/term_details?term=GO:0044238
cellular macromolecular complex assembly	Gene Ontology	GO:0034622	52	199	0.00979554	Afu4g07730-T|Afu3g06070-T|Afu2g08480-T|Afu3g09370-T|Afu5g02910-T|Afu5g11200-T|Afu1g01990-T|Afu2g06200-T|Afu6g01990-T|Afu2g17060-T|Afu1g13390-T|Afu2g09210-T|Afu7g04490-T|Afu6g04660-T|Afu3g06640-T|Afu1g11130-T|Afu7g04430-T|Afu3g06330-T|Afu3g06580-T|Afu5g06510-T|Afu2g11510-T|Afu1g04840-T|Afu6g04100-T|Afu5g13520-T|Afu2g10440-T|Afu5g13470-T|Afu1g04040-T|Afu3g11030-T|Afu3g14010-T|Afu1g02550-T|Afu1g0688…	http://amigo.geneontology.org/cgi-bin/amigo/term_details?term=GO:0034622
alkaloid biosynthetic process	Gene Ontology	GO:0009821	10	20	0.0100969	Afu2g17990-T|Afu8g00230-T|Afu2g17960-T|Afu8g00250-T|Afu6g13990-T|Afu6g12070-T|Afu8g00200-T|Afu8g00170-T|Afu4g14840-T|Afu6g12060-T	http://amigo.geneontology.org/cgi-bin/amigo/term_details?term=GO:0009821
RNA localization	Gene Ontology	GO:0006403	13	31	0.0109562	Afu4g04740-T|Afu2g10090-T|Afu1g04190-T|Afu1g12940-T|Afu7g04490-T|Afu1g05340-T|Afu3g13320-T|Afu1g05630-T|Afu7g01460-T|Afu3g09880-T|Afu1g06770-T|Afu1g13900-T|Afu6g12660-T	http://amigo.geneontology.org/cgi-bin/amigo/term_details?term=GO:0006403
cellular response to UV	Gene Ontology	GO:0034644	9	17	0.0110509	Afu3g08300-T|Afu2g03910-T|Afu1g12940-T|Afu3g06060-T|Afu2g16600-T|Afu2g12250-T|Afu4g07970-T|Afu4g10860-T|Afu5g01870-T	http://amigo.geneontology.org/cgi-bin/amigo/term_details?term=GO:0034644
aromatic amino acid family biosynthetic process	Gene Ontology	GO:0009073	8	14	0.0118415	Afu6g12580-T|Afu2g13250-T|Afu1g02110-T|Afu1g13090-T|Afu5g05690-T|Afu2g10450-T|Afu4g08760-T|Afu7g04070-T	http://amigo.geneontology.org/cgi-bin/amigo/term_details?term=GO:0009073
2'-deoxyribonucleotide metabolic process	Gene Ontology	GO:0009394	6	8	0.0119186	Afu5g12350-T|Afu1g02890-T|Afu4g06690-T|Afu7g04990-T|Afu5g03460-T|Afu4g04270-T	http://amigo.geneontology.org/cgi-bin/amigo/term_details?term=GO:0009394
deoxyribose phosphate metabolic process	Gene Ontology	GO:0019692	6	8	0.0119186	Afu5g12350-T|Afu1g02890-T|Afu4g06690-T|Afu7g04990-T|Afu5g03460-T|Afu4g04270-T	http://amigo.geneontology.org/cgi-bin/amigo/term_details?term=GO:0019692
DNA replication, Okazaki fragment processing	Gene Ontology	GO:0033567	6	8	0.0119186	Afu3g06060-T|Afu1g07320-T|Afu4g07970-T|Afu2g09010-T|Afu4g12210-T|Afu5g13370-T	http://amigo.geneontology.org/cgi-bin/amigo/term_details?term=GO:0033567
lagging strand elongation	Gene Ontology	GO:0006273	6	8	0.0119186	Afu3g06060-T|Afu1g07320-T|Afu4g07970-T|Afu2g09010-T|Afu4g12210-T|Afu5g13370-T	http://amigo.geneontology.org/cgi-bin/amigo/term_details?term=GO:0006273
pyrimidine deoxyribonucleotide metabolic process	Gene Ontology	GO:0009219	6	8	0.0119186	Afu5g12350-T|Afu1g02890-T|Afu4g06690-T|Afu7g04990-T|Afu5g03460-T|Afu4g04270-T	http://amigo.geneontology.org/cgi-bin/amigo/term_details?term=GO:0009219
ribosomal small subunit assembly	Gene Ontology	GO:0000028	6	8	0.0119186	Afu3g06640-T|Afu7g04490-T|Afu3g13320-T|Afu1g04840-T|Afu3g11260-T|Afu2g10440-T	http://amigo.geneontology.org/cgi-bin/amigo/term_details?term=GO:0000028
gene conversion	Gene Ontology	GO:0035822	6	8	0.0119186	Afu2g10730-T|Afu3g09850-T|Afu5g06080-T|Afu3g09560-T|Afu4g04390-T|Afu3g09050-T	http://amigo.geneontology.org/cgi-bin/amigo/term_details?term=GO:0035822
nucleobase-containing compound transport	Gene Ontology	GO:0015931	15	39	0.0119425	Afu1g12940-T|Afu4g04740-T|Afu2g10090-T|Afu6g05170-T|Afu1g04190-T|Afu1g05390-T|Afu1g07450-T|Afu7g04490-T|Afu1g05340-T|Afu3g13320-T|Afu1g05630-T|Afu7g01460-T|Afu1g06770-T|Afu1g13900-T|Afu6g12660-T	http://amigo.geneontology.org/cgi-bin/amigo/term_details?term=GO:0015931
pyrimidine nucleotide biosynthetic process	Gene Ontology	GO:0006221	7	11	0.0122562	Afu8g00850-T|Afu5g12350-T|Afu7g05210-T|Afu4g06690-T|Afu2g08360-T|Afu5g03460-T|Afu4g04270-T	http://amigo.geneontology.org/cgi-bin/amigo/term_details?term=GO:0006221
nucleic acid transport	Gene Ontology	GO:0050657	12	28	0.0125574	Afu4g04740-T|Afu2g10090-T|Afu1g04190-T|Afu1g12940-T|Afu7g04490-T|Afu1g05340-T|Afu3g13320-T|Afu1g05630-T|Afu7g01460-T|Afu1g06770-T|Afu1g13900-T|Afu6g12660-T	http://amigo.geneontology.org/cgi-bin/amigo/term_details?term=GO:0050657
establishment of RNA localization	Gene Ontology	GO:0051236	12	28	0.0125574	Afu4g04740-T|Afu2g10090-T|Afu1g04190-T|Afu1g12940-T|Afu7g04490-T|Afu1g05340-T|Afu3g13320-T|Afu1g05630-T|Afu7g01460-T|Afu1g06770-T|Afu1g13900-T|Afu6g12660-T	http://amigo.geneontology.org/cgi-bin/amigo/term_details?term=GO:0051236
RNA transport	Gene Ontology	GO:0050658	12	28	0.0125574	Afu4g04740-T|Afu2g10090-T|Afu1g04190-T|Afu1g12940-T|Afu7g04490-T|Afu1g05340-T|Afu3g13320-T|Afu1g05630-T|Afu7g01460-T|Afu1g06770-T|Afu1g13900-T|Afu6g12660-T	http://amigo.geneontology.org/cgi-bin/amigo/term_details?term=GO:0050658
sister chromatid segregation	Gene Ontology	GO:0000819	24	76	0.0126602	Afu8g05680-T|Afu3g09370-T|Afu1g14730-T|Afu2g06200-T|Afu7g01400-T|Afu3g05530-T|Afu2g16080-T|Afu4g04740-T|Afu7g03890-T|Afu6g02670-T|Afu2g02170-T|Afu4g10630-T|Afu4g12160-T|Afu3g09560-T|Afu5g01870-T|Afu3g08300-T|Afu7g00250-T|Afu6g08530-T|Afu2g02660-T|Afu3g12250-T|Afu6g08120-T|Afu5g03130-T|Afu1g15120-T|Afu4g11160-T	http://amigo.geneontology.org/cgi-bin/amigo/term_details?term=GO:0000819
cellular response to light stimulus	Gene Ontology	GO:0071482	10	21	0.0129304	Afu3g08300-T|Afu1g12490-T|Afu1g12940-T|Afu3g06060-T|Afu2g03910-T|Afu2g16600-T|Afu2g12250-T|Afu4g07970-T|Afu4g10860-T|Afu5g01870-T	http://amigo.geneontology.org/cgi-bin/amigo/term_details?term=GO:0071482
cellular response to radiation	Gene Ontology	GO:0071478	10	21	0.0129304	Afu3g08300-T|Afu1g12490-T|Afu1g12940-T|Afu3g06060-T|Afu2g03910-T|Afu2g16600-T|Afu2g12250-T|Afu4g07970-T|Afu4g10860-T|Afu5g01870-T	http://amigo.geneontology.org/cgi-bin/amigo/term_details?term=GO:0071478
RNA methylation	Gene Ontology	GO:0001510	9	18	0.0144013	Afu4g12140-T|Afu1g07570-T|Afu5g01850-T|Afu1g13460-T|Afu5g12100-T|Afu1g14180-T|Afu1g14220-T|Afu3g06010-T|Afu5g01760-T	http://amigo.geneontology.org/cgi-bin/amigo/term_details?term=GO:0001510
ether biosynthetic process	Gene Ontology	GO:1901503	9	18	0.0144013	Afu8g00420-T|Afu8g00390-T|Afu8g00230-T|Afu8g00370-T|Afu8g00470-T|Afu8g00380-T|Afu8g00200-T|Afu8g00500-T|Afu8g00400-T	http://amigo.geneontology.org/cgi-bin/amigo/term_details?term=GO:1901503
cellular process	Gene Ontology	GO:0009987	550	2833	0.0148841	Afu2g06310-T|Afu8g06080-T|Afu4g13450-T|Afu3g09370-T|Afu8g01240-T|Afu4g13960-T|Afu1g08810-T|Afu2g03150-T|Afu2g16370-T|Afu7g01400-T|Afu6g04570-T|Afu4g07845-T|Afu1g11530-T|Afu5g06510-T|Afu5g05690-T|Afu1g03110-T|Afu4g13170-T|Afu6g08590-T|Afu5g13470-T|Afu5g02760-T|Afu8g01410-T|Afu1g02550-T|Afu4g08110-T|Afu6g04510-T|Afu1g06880-T|Afu2g01660-T|Afu3g11110-T|Afu7g02130-T|Afu6g08660-T|Afu8g04050-T|Afu7g0486…	http://amigo.geneontology.org/cgi-bin/amigo/term_details?term=GO:0009987
microtubule organizing center	Gene Ontology	GO:0005815	28	96	0.0171344	Afu8g05680-T|Afu3g09370-T|Afu7g01400-T|Afu5g12100-T|Afu4g11160-T|Afu6g01990-T|Afu1g10400-T|Afu2g03910-T|Afu4g04390-T|Afu4g08930-T|Afu3g12250-T|Afu3g06330-T|Afu3g06580-T|Afu2g11810-T|Afu6g02670-T|Afu1g05410-T|Afu1g13390-T|Afu4g12160-T|Afu6g13370-T|Afu5g12270-T|Afu5g06560-T|Afu2g03640-T|Afu5g13050-T|Afu7g01990-T|Afu1g14730-T|Afu5g08110-T|Afu1g07720-T|Afu6g08120-T	http://amigo.geneontology.org/cgi-bin/amigo/term_details?term=GO:0005815
nucleoside phosphate biosynthetic process	Gene Ontology	GO:1901293	22	71	0.0194014	Afu8g00850-T|Afu1g13140-T|Afu4g10790-T|Afu6g05320-T|Afu1g07530-T|Afu5g12350-T|Afu6g11620-T|Afu4g06690-T|Afu2g03610-T|Afu3g15090-T|Afu6g04730-T|Afu7g02310-T|Afu2g11940-T|Afu4g09830-T|Afu4g09840-T|Afu1g15450-T|Afu7g05210-T|Afu4g09360-T|Afu2g08360-T|Afu4g12600-T|Afu5g03460-T|Afu4g04270-T	http://amigo.geneontology.org/cgi-bin/amigo/term_details?term=GO:1901293
nucleotide biosynthetic process	Gene Ontology	GO:0009165	21	67	0.0200533	Afu6g05320-T|Afu2g11940-T|Afu8g00850-T|Afu1g13140-T|Afu5g12350-T|Afu6g11620-T|Afu7g05210-T|Afu7g02310-T|Afu1g07530-T|Afu2g03610-T|Afu4g09840-T|Afu1g15450-T|Afu5g03460-T|Afu2g08360-T|Afu4g10790-T|Afu4g12600-T|Afu4g06690-T|Afu6g04730-T|Afu4g09830-T|Afu4g09360-T|Afu4g04270-T	http://amigo.geneontology.org/cgi-bin/amigo/term_details?term=GO:0009165
nucleotide phosphorylation	Gene Ontology	GO:0046939	8	16	0.0206357	Afu1g06960-T|Afu1g03420-T|Afu2g05910-T|Afu1g07530-T|Afu4g06690-T|Afu6g02230-T|Afu6g07430-T|Afu5g03460-T	http://amigo.geneontology.org/cgi-bin/amigo/term_details?term=GO:0046939
macromolecule biosynthetic process	Gene Ontology	GO:0009059	173	823	0.0224352	Afu8g00420-T|Afu8g00100-T|Afu8g01240-T|Afu7g05460-T|Afu3g01155-T|Afu1g06340-T|Afu6g01990-T|Afu2g16370-T|Afu2g03590-T|Afu6g11260-T|Afu1g16210-T|Afu6g04570-T|Afu1g11130-T|Afu4g07845-T|Afu1g14140-T|Afu4g06690-T|Afu6g11750-T|Afu3g14010-T|Afu2g12250-T|Afu5g07320-T|Afu1g03110-T|Afu4g13170-T|Afu1g02570-T|Afu4g08110-T|Afu7g03690-T|Afu6g04510-T|Afu4g08010-T|Afu1g09330-T|Afu8g04050-T|Afu8g07360-T|Afu4g0797…	http://amigo.geneontology.org/cgi-bin/amigo/term_details?term=GO:0009059
cellular macromolecule biosynthetic process	Gene Ontology	GO:0034645	172	818	0.0225998	Afu8g00420-T|Afu8g00100-T|Afu8g01240-T|Afu7g05460-T|Afu3g01155-T|Afu1g06340-T|Afu6g01990-T|Afu2g16370-T|Afu2g03590-T|Afu6g11260-T|Afu1g16210-T|Afu6g04570-T|Afu1g11130-T|Afu4g07845-T|Afu1g14140-T|Afu4g06690-T|Afu6g11750-T|Afu3g14010-T|Afu2g12250-T|Afu5g07320-T|Afu1g03110-T|Afu4g13170-T|Afu1g02570-T|Afu4g08110-T|Afu7g03690-T|Afu6g04510-T|Afu4g08010-T|Afu1g09330-T|Afu8g04050-T|Afu8g07360-T|Afu4g0797…	http://amigo.geneontology.org/cgi-bin/amigo/term_details?term=GO:0034645
epoxide metabolic process	Gene Ontology	GO:0097176	7	13	0.0227146	Afu8g00420-T|Afu8g00390-T|Afu8g00370-T|Afu8g00470-T|Afu8g00380-T|Afu8g00500-T|Afu8g00400-T	http://amigo.geneontology.org/cgi-bin/amigo/term_details?term=GO:0097176
fumagillin metabolic process	Gene Ontology	GO:1902084	7	13	0.0227146	Afu8g00420-T|Afu8g00390-T|Afu8g00370-T|Afu8g00470-T|Afu8g00380-T|Afu8g00500-T|Afu8g00400-T	http://amigo.geneontology.org/cgi-bin/amigo/term_details?term=GO:1902084
fumagillin biosynthetic process	Gene Ontology	GO:1902086	7	13	0.0227146	Afu8g00420-T|Afu8g00390-T|Afu8g00370-T|Afu8g00470-T|Afu8g00380-T|Afu8g00500-T|Afu8g00400-T	http://amigo.geneontology.org/cgi-bin/amigo/term_details?term=GO:1902086
alcohol biosynthetic process	Gene Ontology	GO:0046165	20	64	0.023409	Afu7g01220-T|Afu7g01010-T|Afu8g00370-T|Afu4g14770-T|Afu4g11500-T|Afu2g11550-T|Afu2g07680-T|Afu1g04720-T|Afu8g01240-T|Afu2g03700-T|Afu8g00230-T|Afu6g13990-T|Afu8g00940-T|Afu1g17190-T|Afu6g12070-T|Afu8g00200-T|Afu5g06800-T|Afu2g01290-T|Afu4g14840-T|Afu4g03630-T	http://amigo.geneontology.org/cgi-bin/amigo/term_details?term=GO:0046165
deoxyribonucleotide metabolic process	Gene Ontology	GO:0009262	6	10	0.0243052	Afu5g12350-T|Afu1g02890-T|Afu4g06690-T|Afu7g04990-T|Afu5g03460-T|Afu4g04270-T	http://amigo.geneontology.org/cgi-bin/amigo/term_details?term=GO:0009262
UV-damage excision repair	Gene Ontology	GO:0070914	6	10	0.0243052	Afu3g08300-T|Afu3g06060-T|Afu2g16600-T|Afu2g12250-T|Afu4g07970-T|Afu5g01870-T	http://amigo.geneontology.org/cgi-bin/amigo/term_details?term=GO:0070914
ribosomal large subunit export from nucleus	Gene Ontology	GO:0000055	5	7	0.024613	Afu4g08930-T|Afu6g12920-T|Afu2g16750-T|Afu7g04430-T|Afu1g04040-T	http://amigo.geneontology.org/cgi-bin/amigo/term_details?term=GO:0000055
rRNA methylation	Gene Ontology	GO:0031167	5	7	0.024613	Afu5g01760-T|Afu1g14220-T|Afu1g13460-T|Afu3g06010-T|Afu5g12100-T	http://amigo.geneontology.org/cgi-bin/amigo/term_details?term=GO:0031167
organelle localization	Gene Ontology	GO:0051640	21	69	0.0254425	Afu5g06520-T|Afu4g04740-T|Afu1g02550-T|Afu3g09370-T|Afu5g06510-T|Afu1g13140-T|Afu6g08530-T|Afu7g04430-T|Afu8g03930-T|Afu7g00250-T|Afu7g04490-T|Afu4g13390-T|Afu2g11510-T|Afu3g11110-T|Afu2g16750-T|Afu3g10720-T|Afu6g12920-T|Afu4g08930-T|Afu1g04040-T|Afu6g08660-T|Afu1g05630-T	http://amigo.geneontology.org/cgi-bin/amigo/term_details?term=GO:0051640
DNA conformation change	Gene Ontology	GO:0071103	15	44	0.0265526	Afu3g05530-T|Afu6g04660-T|Afu2g09060-T|Afu3g06070-T|Afu1g13780-T|Afu1g12940-T|Afu1g15120-T|Afu5g02910-T|Afu3g11030-T|Afu2g02660-T|Afu2g06200-T|Afu7g03890-T|Afu6g02670-T|Afu2g02170-T|Afu5g13370-T	http://amigo.geneontology.org/cgi-bin/amigo/term_details?term=GO:0071103
microtubule-based process	Gene Ontology	GO:0007017	19	61	0.027349	Afu8g05680-T|Afu3g09370-T|Afu2g03150-T|Afu1g13140-T|Afu3g12250-T|Afu4g04740-T|Afu6g08660-T|Afu7g00250-T|Afu4g13390-T|Afu1g01640-T|Afu1g07580-T|Afu1g14970-T|Afu4g11160-T|Afu3g10720-T|Afu5g13050-T|Afu6g02670-T|Afu7g01400-T|Afu1g02550-T|Afu1g13390-T	http://amigo.geneontology.org/cgi-bin/amigo/term_details?term=GO:0007017
pyruvate metabolic process	Gene Ontology	GO:0006090	9	21	0.0288902	Afu1g06960-T|Afu2g05910-T|Afu7g05720-T|Afu3g08270-T|Afu4g07710-T|Afu6g02230-T|Afu6g07430-T|Afu7g01000-T|Afu3g04170-T	http://amigo.geneontology.org/cgi-bin/amigo/term_details?term=GO:0006090
response to UV	Gene Ontology	GO:0009411	9	21	0.0288902	Afu3g08300-T|Afu2g03910-T|Afu1g12940-T|Afu3g06060-T|Afu2g16600-T|Afu2g12250-T|Afu4g07970-T|Afu4g10860-T|Afu5g01870-T	http://amigo.geneontology.org/cgi-bin/amigo/term_details?term=GO:0009411
organic hydroxy compound metabolic process	Gene Ontology	GO:1901615	37	143	0.0292155	Afu8g00230-T|Afu1g12490-T|Afu8g01240-T|Afu2g03700-T|Afu8g00940-T|Afu8g02590-T|Afu2g17540-T|Afu7g01220-T|Afu2g11550-T|Afu4g14770-T|Afu4g07130-T|Afu2g17990-T|Afu4g01380-T|Afu8g00200-T|Afu4g11500-T|Afu7g01000-T|Afu4g14840-T|Afu4g03630-T|Afu6g12060-T|Afu8g00370-T|Afu8g00620-T|Afu1g04720-T|Afu5g06800-T|Afu2g01290-T|Afu5g01170-T|Afu1g17190-T|Afu6g12070-T|Afu6g13990-T|Afu7g01010-T|Afu2g07680-T|Afu5g0964…	http://amigo.geneontology.org/cgi-bin/amigo/term_details?term=GO:1901615
cell cycle G2/M phase transition	Gene Ontology	GO:0044839	11	29	0.0312405	Afu4g04390-T|Afu3g09560-T|Afu3g08300-T|Afu8g05680-T|Afu1g12940-T|Afu3g12250-T|Afu4g04740-T|Afu2g03490-T|Afu6g02670-T|Afu4g12160-T|Afu6g13160-T	http://amigo.geneontology.org/cgi-bin/amigo/term_details?term=GO:0044839
G2/M transition of mitotic cell cycle	Gene Ontology	GO:0000086	11	29	0.0312405	Afu4g04390-T|Afu3g09560-T|Afu3g08300-T|Afu8g05680-T|Afu1g12940-T|Afu3g12250-T|Afu4g04740-T|Afu2g03490-T|Afu6g02670-T|Afu4g12160-T|Afu6g13160-T	http://amigo.geneontology.org/cgi-bin/amigo/term_details?term=GO:0000086
mitotic sister chromatid segregation	Gene Ontology	GO:0000070	21	71	0.0318706	Afu3g05530-T|Afu7g01400-T|Afu3g09560-T|Afu8g05680-T|Afu3g09370-T|Afu2g16080-T|Afu4g04740-T|Afu7g00250-T|Afu1g14730-T|Afu6g08530-T|Afu2g02660-T|Afu4g11160-T|Afu2g06200-T|Afu2g02170-T|Afu6g08120-T|Afu3g12250-T|Afu6g02670-T|Afu4g12160-T|Afu7g03890-T|Afu4g10630-T|Afu5g03130-T	http://amigo.geneontology.org/cgi-bin/amigo/term_details?term=GO:0000070
nucleoside diphosphate metabolic process	Gene Ontology	GO:0009132	8	18	0.0332672	Afu1g06960-T|Afu2g05910-T|Afu1g07530-T|Afu5g12350-T|Afu4g06690-T|Afu6g02230-T|Afu6g07430-T|Afu5g03460-T	http://amigo.geneontology.org/cgi-bin/amigo/term_details?term=GO:0009132
nitrogen compound transport	Gene Ontology	GO:0071705	28	103	0.0336998	Afu5g02940-T|Afu6g14530-T|Afu6g05170-T|Afu5g02790-T|Afu4g06230-T|Afu6g11100-T|Afu8g00940-T|Afu5g01510-T|Afu2g10090-T|Afu4g04740-T|Afu1g05390-T|Afu1g07450-T|Afu7g04490-T|Afu2g15130-T|Afu2g04080-T|Afu4g13090-T|Afu6g12660-T|Afu1g04190-T|Afu1g17470-T|Afu1g05630-T|Afu1g13900-T|Afu4g03220-T|Afu1g12940-T|Afu1g05340-T|Afu7g01490-T|Afu1g06770-T|Afu3g13320-T|Afu7g01460-T	http://amigo.geneontology.org/cgi-bin/amigo/term_details?term=GO:0071705
gene conversion at mating-type locus	Gene Ontology	GO:0007534	4	5	0.0347597	Afu4g04390-T|Afu2g10730-T|Afu3g09050-T|Afu5g06080-T	http://amigo.geneontology.org/cgi-bin/amigo/term_details?term=GO:0007534
indole-containing compound biosynthetic process	Gene Ontology	GO:0042435	4	5	0.0347597	Afu8g00170-T|Afu6g12580-T|Afu2g13250-T|Afu1g13090-T	http://amigo.geneontology.org/cgi-bin/amigo/term_details?term=GO:0042435
pyrimidine deoxyribonucleotide biosynthetic process	Gene Ontology	GO:0009221	4	5	0.0347597	Afu5g12350-T|Afu4g06690-T|Afu5g03460-T|Afu4g04270-T	http://amigo.geneontology.org/cgi-bin/amigo/term_details?term=GO:0009221
deoxyribose phosphate biosynthetic process	Gene Ontology	GO:0046385	4	5	0.0347597	Afu5g12350-T|Afu4g06690-T|Afu5g03460-T|Afu4g04270-T	http://amigo.geneontology.org/cgi-bin/amigo/term_details?term=GO:0046385
2'-deoxyribonucleotide biosynthetic process	Gene Ontology	GO:0009265	4	5	0.0347597	Afu5g12350-T|Afu4g06690-T|Afu5g03460-T|Afu4g04270-T	http://amigo.geneontology.org/cgi-bin/amigo/term_details?term=GO:0009265
premeiotic DNA replication	Gene Ontology	GO:0006279	4	5	0.0347597	Afu4g07970-T|Afu3g09560-T|Afu2g09060-T|Afu2g10730-T	http://amigo.geneontology.org/cgi-bin/amigo/term_details?term=GO:0006279
deoxyribonucleotide biosynthetic process	Gene Ontology	GO:0009263	4	5	0.0347597	Afu5g12350-T|Afu4g06690-T|Afu5g03460-T|Afu4g04270-T	http://amigo.geneontology.org/cgi-bin/amigo/term_details?term=GO:0009263
arginine biosynthetic process	Gene Ontology	GO:0006526	5	8	0.0351245	Afu2g04310-T|Afu2g12470-T|Afu6g02910-T|Afu5g08120-T|Afu3g04170-T	http://amigo.geneontology.org/cgi-bin/amigo/term_details?term=GO:0006526
pyrimidine nucleoside triphosphate metabolic process	Gene Ontology	GO:0009147	5	8	0.0351245	Afu4g06690-T|Afu1g02890-T|Afu7g05210-T|Afu5g03460-T|Afu7g04990-T	http://amigo.geneontology.org/cgi-bin/amigo/term_details?term=GO:0009147
macromolecule metabolic process	Gene Ontology	GO:0043170	306	1545	0.0351618	Afu2g06310-T|Afu8g00420-T|Afu5g01272-T|Afu1g04320-T|Afu8g00100-T|Afu8g01240-T|Afu5g09430-T|Afu1g11290-T|Afu7g05460-T|Afu3g01155-T|Afu4g04260-T|Afu4g10800-T|Afu6g01990-T|Afu4g14590-T|Afu1g15120-T|Afu1g06360-T|Afu5g01740-T|Afu1g04530-T|Afu2g03590-T|Afu6g11260-T|Afu1g16210-T|Afu6g04570-T|Afu1g11130-T|Afu4g07845-T|Afu1g14140-T|Afu7g04430-T|Afu4g06690-T|Afu6g11750-T|Afu3g14010-T|Afu2g08480-T|Afu2g1225…	http://amigo.geneontology.org/cgi-bin/amigo/term_details?term=GO:0043170
regulation of G2/M transition of mitotic cell cycle	Gene Ontology	GO:0010389	9	22	0.0354193	Afu4g04390-T|Afu3g09560-T|Afu3g08300-T|Afu1g12940-T|Afu3g12250-T|Afu4g04740-T|Afu2g03490-T|Afu6g02670-T|Afu6g13160-T	http://amigo.geneontology.org/cgi-bin/amigo/term_details?term=GO:0010389
regulation of cell cycle G2/M phase transition	Gene Ontology	GO:1902749	9	22	0.0354193	Afu4g04390-T|Afu3g09560-T|Afu3g08300-T|Afu1g12940-T|Afu3g12250-T|Afu4g04740-T|Afu2g03490-T|Afu6g02670-T|Afu6g13160-T	http://amigo.geneontology.org/cgi-bin/amigo/term_details?term=GO:1902749
nucleotide metabolic process	Gene Ontology	GO:0009117	33	127	0.036202	Afu8g00850-T|Afu1g13140-T|Afu1g02890-T|Afu2g03700-T|Afu4g10790-T|Afu6g05320-T|Afu1g06960-T|Afu1g07530-T|Afu5g12350-T|Afu2g05910-T|Afu6g11620-T|Afu4g06690-T|Afu2g03610-T|Afu6g07430-T|Afu7g01000-T|Afu6g04730-T|Afu7g02310-T|Afu2g11940-T|Afu1g03420-T|Afu4g09830-T|Afu4g09840-T|Afu1g15450-T|Afu4g00970-T|Afu7g04990-T|Afu7g01010-T|Afu4g02960-T|Afu7g05210-T|Afu6g02230-T|Afu4g09360-T|Afu2g08360-T|Afu4g1260…	http://amigo.geneontology.org/cgi-bin/amigo/term_details?term=GO:0009117
secondary alcohol biosynthetic process	Gene Ontology	GO:1902653	13	38	0.0366239	Afu7g01220-T|Afu2g01290-T|Afu8g00370-T|Afu1g17190-T|Afu2g11550-T|Afu2g07680-T|Afu1g04720-T|Afu4g14770-T|Afu2g03700-T|Afu8g00940-T|Afu6g12070-T|Afu4g11500-T|Afu4g03630-T	http://amigo.geneontology.org/cgi-bin/amigo/term_details?term=GO:1902653
nucleoside phosphate metabolic process	Gene Ontology	GO:0006753	34	132	0.0370941	Afu8g00850-T|Afu1g13140-T|Afu1g02890-T|Afu2g03700-T|Afu4g10790-T|Afu2g11940-T|Afu6g05320-T|Afu1g06960-T|Afu1g07530-T|Afu5g12350-T|Afu2g05910-T|Afu6g11620-T|Afu4g06690-T|Afu2g03610-T|Afu6g07430-T|Afu7g01000-T|Afu6g04730-T|Afu7g02310-T|Afu3g15090-T|Afu1g03420-T|Afu4g09830-T|Afu4g09840-T|Afu1g15450-T|Afu4g00970-T|Afu7g04990-T|Afu7g01010-T|Afu4g02960-T|Afu7g05210-T|Afu6g02230-T|Afu4g09360-T|Afu2g0836…	http://amigo.geneontology.org/cgi-bin/amigo/term_details?term=GO:0006753
nuclear chromosome segregation	Gene Ontology	GO:0098813	24	86	0.0376518	Afu8g05680-T|Afu3g09370-T|Afu1g14730-T|Afu2g06200-T|Afu7g01400-T|Afu3g05530-T|Afu2g16080-T|Afu4g04740-T|Afu7g03890-T|Afu6g02670-T|Afu2g02170-T|Afu4g10630-T|Afu4g12160-T|Afu3g09560-T|Afu5g01870-T|Afu3g08300-T|Afu7g00250-T|Afu6g08530-T|Afu2g02660-T|Afu3g12250-T|Afu6g08120-T|Afu5g03130-T|Afu1g15120-T|Afu4g11160-T	http://amigo.geneontology.org/cgi-bin/amigo/term_details?term=GO:0098813
acetyl-CoA metabolic process	Gene Ontology	GO:0006084	7	15	0.0380937	Afu1g06960-T|Afu7g05720-T|Afu3g08270-T|Afu4g07130-T|Afu2g03700-T|Afu5g04230-T|Afu3g04170-T	http://amigo.geneontology.org/cgi-bin/amigo/term_details?term=GO:0006084
indole-containing compound metabolic process	Gene Ontology	GO:0042430	7	15	0.0380937	Afu6g12580-T|Afu4g09830-T|Afu2g13250-T|Afu1g13090-T|Afu4g09840-T|Afu8g00170-T|Afu5g02850-T	http://amigo.geneontology.org/cgi-bin/amigo/term_details?term=GO:0042430
ncRNA 3'-end processing	Gene Ontology	GO:0043628	8	19	0.0412108	Afu2g03590-T|Afu5g05710-T|Afu3g09880-T|Afu7g03690-T|Afu7g00870-T|Afu3g13320-T|Afu1g14220-T|Afu2g13130-T	http://amigo.geneontology.org/cgi-bin/amigo/term_details?term=GO:0043628
macromolecular complex assembly	Gene Ontology	GO:0065003	55	235	0.0412835	Afu4g07730-T|Afu3g06070-T|Afu2g08480-T|Afu3g09370-T|Afu6g06430-T|Afu5g02910-T|Afu5g11200-T|Afu1g01990-T|Afu7g04430-T|Afu2g06200-T|Afu6g01990-T|Afu2g17060-T|Afu1g13390-T|Afu2g09210-T|Afu7g04490-T|Afu6g04660-T|Afu3g06640-T|Afu1g11130-T|Afu2g03870-T|Afu3g06330-T|Afu3g06580-T|Afu5g06510-T|Afu2g11510-T|Afu1g04840-T|Afu6g04100-T|Afu5g13520-T|Afu2g10440-T|Afu5g13470-T|Afu1g04040-T|Afu3g11030-T|Afu3g1401…	http://amigo.geneontology.org/cgi-bin/amigo/term_details?term=GO:0065003
secondary alcohol metabolic process	Gene Ontology	GO:1902652	13	39	0.0423166	Afu7g01220-T|Afu2g01290-T|Afu8g00370-T|Afu1g17190-T|Afu2g11550-T|Afu2g07680-T|Afu1g04720-T|Afu4g14770-T|Afu2g03700-T|Afu8g00940-T|Afu6g12070-T|Afu4g11500-T|Afu4g03630-T	http://amigo.geneontology.org/cgi-bin/amigo/term_details?term=GO:1902652
movement of cell or subcellular component	Gene Ontology	GO:0006928	9	23	0.0428923	Afu5g13050-T|Afu2g03150-T|Afu1g13140-T|Afu3g10720-T|Afu7g00250-T|Afu4g13390-T|Afu1g01640-T|Afu2g08360-T|Afu7g01400-T	http://amigo.geneontology.org/cgi-bin/amigo/term_details?term=GO:0006928
chromosome segregation	Gene Ontology	GO:0007059	25	92	0.0430988	Afu8g05680-T|Afu3g09370-T|Afu4g11160-T|Afu2g06200-T|Afu7g01400-T|Afu3g05530-T|Afu2g16080-T|Afu4g04740-T|Afu7g03890-T|Afu1g14730-T|Afu6g02670-T|Afu2g02170-T|Afu4g10630-T|Afu4g12160-T|Afu3g09560-T|Afu5g01870-T|Afu3g08300-T|Afu7g00250-T|Afu1g07320-T|Afu6g08530-T|Afu2g02660-T|Afu3g12250-T|Afu6g08120-T|Afu5g03130-T|Afu1g15120-T	http://amigo.geneontology.org/cgi-bin/amigo/term_details?term=GO:0007059
positive regulation by organism of defense response of other organism involved in symbiotic interaction	Gene Ontology	GO:0052510	6	12	0.0431855	Afu7g01010-T|Afu6g12930-T|Afu4g07360-T|Afu8g03930-T|Afu2g03610-T|Afu6g07430-T	http://amigo.geneontology.org/cgi-bin/amigo/term_details?term=GO:0052510
induction by symbiont of host defense response	Gene Ontology	GO:0044416	6	12	0.0431855	Afu7g01010-T|Afu6g12930-T|Afu4g07360-T|Afu8g03930-T|Afu2g03610-T|Afu6g07430-T	http://amigo.geneontology.org/cgi-bin/amigo/term_details?term=GO:0044416
microtubule polymerization or depolymerization	Gene Ontology	GO:0031109	6	12	0.0431855	Afu1g13390-T|Afu3g09370-T|Afu7g00250-T|Afu2g03150-T|Afu6g08660-T|Afu1g02550-T	http://amigo.geneontology.org/cgi-bin/amigo/term_details?term=GO:0031109
induction by organism of defense response of other organism involved in symbiotic interaction	Gene Ontology	GO:0052251	6	12	0.0431855	Afu7g01010-T|Afu6g12930-T|Afu4g07360-T|Afu8g03930-T|Afu2g03610-T|Afu6g07430-T	http://amigo.geneontology.org/cgi-bin/amigo/term_details?term=GO:0052251
positive regulation by symbiont of host defense response	Gene Ontology	GO:0052509	6	12	0.0431855	Afu7g01010-T|Afu6g12930-T|Afu4g07360-T|Afu8g03930-T|Afu2g03610-T|Afu6g07430-T	http://amigo.geneontology.org/cgi-bin/amigo/term_details?term=GO:0052509
regulation of binding	Gene Ontology	GO:0051098	6	12	0.0431855	Afu5g06080-T|Afu2g14810-T|Afu1g12940-T|Afu2g03490-T|Afu5g02330-T|Afu1g11860-T	http://amigo.geneontology.org/cgi-bin/amigo/term_details?term=GO:0051098
positive regulation of defense response	Gene Ontology	GO:0031349	6	12	0.0431855	Afu7g01010-T|Afu6g12930-T|Afu4g07360-T|Afu8g03930-T|Afu2g03610-T|Afu6g07430-T	http://amigo.geneontology.org/cgi-bin/amigo/term_details?term=GO:0031349
pyrimidine-containing compound metabolic process	Gene Ontology	GO:0072527	10	27	0.0435857	Afu8g00850-T|Afu1g02890-T|Afu5g12350-T|Afu8g02770-T|Afu7g05210-T|Afu4g06690-T|Afu2g08360-T|Afu7g04990-T|Afu5g03460-T|Afu4g04270-T	http://amigo.geneontology.org/cgi-bin/amigo/term_details?term=GO:0072527
secondary metabolite biosynthetic process	Gene Ontology	GO:0044550	40	164	0.0472854	Afu4g09150-T|Afu8g06080-T|Afu8g00230-T|Afu1g12490-T|Afu1g13140-T|Afu8g01240-T|Afu6g13990-T|Afu8g00940-T|Afu3g12120-T|Afu6g12180-T|Afu2g17540-T|Afu6g02910-T|Afu4g14770-T|Afu8g00200-T|Afu5g06800-T|Afu8g00170-T|Afu4g14840-T|Afu6g12060-T|Afu8g00370-T|Afu8g00620-T|Afu6g00660-T|Afu2g17990-T|Afu2g17960-T|Afu2g01290-T|Afu6g12070-T|Afu3g14920-T|Afu5g06610-T|Afu6g09630-T|Afu2g03700-T|Afu1g17190-T|Afu2g0768…	http://amigo.geneontology.org/cgi-bin/amigo/term_details?term=GO:0044550
ribonucleoside diphosphate metabolic process	Gene Ontology	GO:0009185	7	16	0.0478466	Afu1g06960-T|Afu2g05910-T|Afu1g07530-T|Afu5g12350-T|Afu4g06690-T|Afu6g02230-T|Afu6g07430-T	http://amigo.geneontology.org/cgi-bin/amigo/term_details?term=GO:0009185
negative regulation of G2/M transition of mitotic cell cycle	Gene Ontology	GO:0010972	7	16	0.0478466	Afu4g04390-T|Afu4g04740-T|Afu3g08300-T|Afu3g12250-T|Afu3g09560-T|Afu2g03490-T|Afu6g13160-T	http://amigo.geneontology.org/cgi-bin/amigo/term_details?term=GO:0010972
regulation of DNA-dependent DNA replication	Gene Ontology	GO:0090329	7	16	0.0478466	Afu4g04390-T|Afu4g04745-T|Afu1g12940-T|Afu5g02520-T|Afu3g06580-T|Afu6g01990-T|Afu6g13160-T	http://amigo.geneontology.org/cgi-bin/amigo/term_details?term=GO:0090329
negative regulation of cell cycle G2/M phase transition	Gene Ontology	GO:1902750	7	16	0.0478466	Afu4g04390-T|Afu4g04740-T|Afu3g08300-T|Afu3g12250-T|Afu3g09560-T|Afu2g03490-T|Afu6g13160-T	http://amigo.geneontology.org/cgi-bin/amigo/term_details?term=GO:1902750
pyrimidine ribonucleoside metabolic process	Gene Ontology	GO:0046131	5	9	0.0480167	Afu5g12350-T|Afu4g06690-T|Afu8g02770-T|Afu7g05210-T|Afu2g08360-T	http://amigo.geneontology.org/cgi-bin/amigo/term_details?term=GO:0046131
pyrimidine nucleoside metabolic process	Gene Ontology	GO:0006213	5	9	0.0480167	Afu5g12350-T|Afu4g06690-T|Afu8g02770-T|Afu7g05210-T|Afu2g08360-T	http://amigo.geneontology.org/cgi-bin/amigo/term_details?term=GO:0006213
rRNA 3'-end processing	Gene Ontology	GO:0031125	5	9	0.0480167	Afu2g03590-T|Afu7g00870-T|Afu3g09880-T|Afu3g13320-T|Afu2g13130-T	http://amigo.geneontology.org/cgi-bin/amigo/term_details?term=GO:0031125

## Sheet: GO up xylP HS 60' vs xylP 30ºC
#Term	Database	ID	Input number	Background number	P-Value	Input	Hyperlink
transmembrane transport	Gene Ontology	GO:0055085	82	464	0.000419832	Afu8g02200-T|Afu4g11400-T|Afu5g10630-T|Afu6g00130-T|Afu1g05020-T|Afu6g03140-T|Afu2g08800-T|Afu7g05100-T|Afu2g16210-T|Afu6g03200-T|Afu4g03740-T|Afu4g08740-T|Afu3g13520-T|Afu7g01190-T|Afu3g01560-T|Afu1g01930-T|Afu6g00710-T|Afu3g12010-T|Afu2g15000-T|Afu1g04870-T|Afu2g08900-T|Afu1g01550-T|Afu5g12920-T|Afu5g06580-T|Afu8g04150-T|Afu5g10430-T|Afu2g15240-T|Afu5g00930-T|Afu2g05190-T|Afu3g08850-T|Afu5g0229…	http://amigo.geneontology.org/cgi-bin/amigo/term_details?term=GO:0055085
anion transport	Gene Ontology	GO:0006820	18	56	0.000479101	Afu3g07990-T|Afu5g10630-T|Afu8g04630-T|Afu8g01850-T|Afu5g00930-T|Afu1g05020-T|Afu5g07970-T|Afu5g02290-T|Afu2g15090-T|Afu2g16210-T|Afu3g03010-T|Afu7g05910-T|Afu2g08900-T|Afu3g10880-T|Afu3g01560-T|Afu1g04780-T|Afu4g09040-T|Afu2g08800-T	http://amigo.geneontology.org/cgi-bin/amigo/term_details?term=GO:0006820
DNA repair	Gene Ontology	GO:0006281	29	123	0.000965812	Afu4g03840-T|Afu1g10480-T|Afu2g10820-T|Afu4g11140-T|Afu3g11140-T|Afu5g09000-T|Afu5g11580-T|Afu5g06080-T|Afu4g03150-T|Afu1g02700-T|Afu6g14210-T|Afu7g02200-T|Afu2g04860-T|Afu1g06720-T|Afu1g07620-T|Afu7g05280-T|Afu2g08540-T|Afu5g06690-T|Afu6g13340-T|Afu2g08840-T|Afu1g03050-T|Afu8g05820-T|Afu6g08570-T|Afu1g11170-T|Afu4g11620-T|Afu7g01270-T|Afu4g06490-T|Afu6g07500-T|Afu6g10530-T	http://amigo.geneontology.org/cgi-bin/amigo/term_details?term=GO:0006281
translesion synthesis	Gene Ontology	GO:0019985	6	10	0.00410783	Afu6g08570-T|Afu7g01270-T|Afu5g09000-T|Afu1g02700-T|Afu2g08840-T|Afu6g14210-T	http://amigo.geneontology.org/cgi-bin/amigo/term_details?term=GO:0019985
DNA biosynthetic process	Gene Ontology	GO:0071897	10	28	0.00462398	Afu3g11140-T|Afu6g08570-T|Afu7g01270-T|Afu5g06080-T|Afu2g08840-T|Afu1g02700-T|Afu1g13230-T|Afu5g13920-T|Afu6g14210-T|Afu5g09000-T	http://amigo.geneontology.org/cgi-bin/amigo/term_details?term=GO:0071897
amide transport	Gene Ontology	GO:0042886	8	19	0.00504726	Afu1g07440-T|Afu2g15240-T|Afu1g04870-T|Afu1g13210-T|Afu6g03140-T|Afu5g07970-T|Afu5g01630-T|Afu6g14210-T	http://amigo.geneontology.org/cgi-bin/amigo/term_details?term=GO:0042886
inorganic anion transport	Gene Ontology	GO:0015698	8	20	0.00643067	Afu5g10630-T|Afu8g01850-T|Afu1g05020-T|Afu5g02290-T|Afu2g16210-T|Afu3g03010-T|Afu2g08900-T|Afu2g15090-T	http://amigo.geneontology.org/cgi-bin/amigo/term_details?term=GO:0015698
cellular amide catabolic process	Gene Ontology	GO:0043605	7	16	0.00731859	Afu1g03860-T|Afu1g13210-T|Afu3g08050-T|Afu2g02250-T|Afu3g12560-T|Afu1g15520-T|Afu6g08000-T	http://amigo.geneontology.org/cgi-bin/amigo/term_details?term=GO:0043605
ion transport	Gene Ontology	GO:0006811	33	173	0.0083886	Afu3g07990-T|Afu5g10630-T|Afu1g05020-T|Afu2g08800-T|Afu2g16210-T|Afu3g01560-T|Afu6g03690-T|Afu1g04780-T|Afu2g15000-T|Afu1g01550-T|Afu5g12920-T|Afu5g00930-T|Afu5g02290-T|Afu6g02820-T|Afu2g08900-T|Afu3g10880-T|Afu1g05760-T|Afu4g09040-T|Afu3g09970-T|Afu5g11020-T|Afu7g05910-T|Afu4g09440-T|Afu3g07540-T|Afu3g12740-T|Afu2g15090-T|Afu8g04630-T|Afu8g01850-T|Afu6g07050-T|Afu5g07970-T|Afu3g03010-T|Afu4g1099…	http://amigo.geneontology.org/cgi-bin/amigo/term_details?term=GO:0006811
DNA synthesis involved in DNA repair	Gene Ontology	GO:0000731	7	17	0.00941778	Afu6g14210-T|Afu6g08570-T|Afu7g01270-T|Afu5g06080-T|Afu1g02700-T|Afu5g09000-T|Afu2g08840-T	http://amigo.geneontology.org/cgi-bin/amigo/term_details?term=GO:0000731
peptide transport	Gene Ontology	GO:0015833	6	13	0.0105882	Afu1g07440-T|Afu2g15240-T|Afu6g03140-T|Afu5g07970-T|Afu5g01630-T|Afu6g14210-T	http://amigo.geneontology.org/cgi-bin/amigo/term_details?term=GO:0015833
RNA biosynthetic process	Gene Ontology	GO:0032774	78	505	0.0126633	Afu3g02920-T|Afu8g02700-T|Afu3g14040-T|Afu5g00950-T|Afu6g00120-T|Afu1g06720-T|Afu3g11960-T|Afu1g11620-T|Afu1g03860-T|Afu6g11430-T|Afu1g04170-T|Afu2g11180-T|Afu5g07510-T|Afu3g10570-T|Afu6g06535-T|Afu5g12960-T|Afu6g12160-T|Afu1g06380-T|Afu7g00770-T|Afu1g11630-T|Afu8g01940-T|Afu7g01850-T|Afu6g13130-T|Afu6g14130-T|Afu5g09090-T|Afu1g09350-T|Afu6g14210-T|Afu1g17150-T|Afu3g14370-T|Afu2g05380-T|Afu5g0165…	http://amigo.geneontology.org/cgi-bin/amigo/term_details?term=GO:0032774
cellular response to DNA damage stimulus	Gene Ontology	GO:0006974	29	152	0.0128679	Afu4g03840-T|Afu1g10480-T|Afu2g10820-T|Afu4g11140-T|Afu3g11140-T|Afu5g09000-T|Afu5g11580-T|Afu5g06080-T|Afu4g03150-T|Afu1g02700-T|Afu6g14210-T|Afu7g02200-T|Afu2g04860-T|Afu1g06720-T|Afu1g07620-T|Afu7g05280-T|Afu2g08540-T|Afu5g06690-T|Afu6g13340-T|Afu2g08840-T|Afu1g03050-T|Afu8g05820-T|Afu6g08570-T|Afu1g11170-T|Afu4g11620-T|Afu7g01270-T|Afu4g06490-T|Afu6g07500-T|Afu6g10530-T	http://amigo.geneontology.org/cgi-bin/amigo/term_details?term=GO:0006974
DNA metabolic process	Gene Ontology	GO:0006259	35	193	0.0129169	Afu4g03840-T|Afu1g10480-T|Afu2g10820-T|Afu4g11140-T|Afu3g11140-T|Afu5g09000-T|Afu5g11580-T|Afu5g06080-T|Afu4g03150-T|Afu1g02700-T|Afu6g14210-T|Afu7g02200-T|Afu2g04860-T|Afu5g13920-T|Afu1g06720-T|Afu1g07620-T|Afu5g04170-T|Afu1g10850-T|Afu7g05280-T|Afu2g08540-T|Afu1g13230-T|Afu2g03210-T|Afu6g13340-T|Afu5g06690-T|Afu2g08840-T|Afu1g03050-T|Afu8g05820-T|Afu6g08570-T|Afu1g11170-T|Afu4g11620-T|Afu7g0127…	http://amigo.geneontology.org/cgi-bin/amigo/term_details?term=GO:0006259
nucleobase-containing compound biosynthetic process	Gene Ontology	GO:0034654	91	607	0.0144799	Afu8g02700-T|Afu3g14040-T|Afu5g11580-T|Afu7g01270-T|Afu1g09350-T|Afu2g05820-T|Afu4g04502-T|Afu6g13130-T|Afu2g08540-T|Afu7g06550-T|Afu5g07530-T|Afu5g13790-T|Afu2g08840-T|Afu5g04060-T|Afu1g15910-T|Afu1g17460-T|Afu2g15790-T|Afu6g05070-T|Afu6g14150-T|Afu1g02480-T|Afu3g11960-T|Afu3g08050-T|Afu5g13080-T|Afu1g10850-T|Afu6g14130-T|Afu1g02700-T|Afu5g01650-T|Afu1g13310-T|Afu5g13920-T|Afu2g09150-T|Afu1g0259…	http://amigo.geneontology.org/cgi-bin/amigo/term_details?term=GO:0034654
purine nucleobase catabolic process	Gene Ontology	GO:0006145	4	6	0.0149144	Afu2g02250-T|Afu4g11220-T|Afu4g08990-T|Afu2g09150-T	http://amigo.geneontology.org/cgi-bin/amigo/term_details?term=GO:0006145
nucleobase catabolic process	Gene Ontology	GO:0046113	4	6	0.0149144	Afu2g02250-T|Afu4g11220-T|Afu4g08990-T|Afu2g09150-T	http://amigo.geneontology.org/cgi-bin/amigo/term_details?term=GO:0046113
protein refolding	Gene Ontology	GO:0042026	4	6	0.0149144	Afu2g09290-T|Afu1g15270-T|Afu1g05040-T|Afu6g10700-T	http://amigo.geneontology.org/cgi-bin/amigo/term_details?term=GO:0042026
nucleic acid-templated transcription	Gene Ontology	GO:0097659	77	502	0.0151125	Afu3g02920-T|Afu8g02700-T|Afu3g14040-T|Afu5g00950-T|Afu6g00120-T|Afu1g06720-T|Afu3g11960-T|Afu1g11620-T|Afu6g11430-T|Afu1g04170-T|Afu2g11180-T|Afu5g07510-T|Afu3g10570-T|Afu6g06535-T|Afu5g12960-T|Afu6g12160-T|Afu1g06380-T|Afu7g00770-T|Afu1g11630-T|Afu8g01940-T|Afu7g01850-T|Afu6g13130-T|Afu6g14130-T|Afu5g09090-T|Afu1g09350-T|Afu1g03860-T|Afu1g17150-T|Afu3g14370-T|Afu2g05380-T|Afu5g01650-T|Afu3g0863…	http://amigo.geneontology.org/cgi-bin/amigo/term_details?term=GO:0097659
transcription, DNA-templated	Gene Ontology	GO:0006351	77	502	0.0151125	Afu3g02920-T|Afu8g02700-T|Afu3g14040-T|Afu5g00950-T|Afu6g00120-T|Afu1g06720-T|Afu3g11960-T|Afu1g11620-T|Afu6g11430-T|Afu1g04170-T|Afu2g11180-T|Afu5g07510-T|Afu3g10570-T|Afu6g06535-T|Afu5g12960-T|Afu6g12160-T|Afu1g06380-T|Afu7g00770-T|Afu1g11630-T|Afu8g01940-T|Afu7g01850-T|Afu6g13130-T|Afu6g14130-T|Afu5g09090-T|Afu1g09350-T|Afu1g03860-T|Afu1g17150-T|Afu3g14370-T|Afu2g05380-T|Afu5g01650-T|Afu3g0863…	http://amigo.geneontology.org/cgi-bin/amigo/term_details?term=GO:0006351
postreplication repair	Gene Ontology	GO:0006301	6	16	0.0221993	Afu6g08570-T|Afu7g01270-T|Afu5g09000-T|Afu1g02700-T|Afu2g08840-T|Afu6g14210-T	http://amigo.geneontology.org/cgi-bin/amigo/term_details?term=GO:0006301
organic anion transport	Gene Ontology	GO:0015711	9	32	0.0234149	Afu3g07990-T|Afu8g04630-T|Afu5g00930-T|Afu2g08800-T|Afu5g07970-T|Afu7g05910-T|Afu3g01560-T|Afu1g04780-T|Afu4g09040-T	http://amigo.geneontology.org/cgi-bin/amigo/term_details?term=GO:0015711
response to stimulus	Gene Ontology	GO:0050896	114	800	0.0234677	Afu4g03840-T|Afu1g10480-T|Afu5g10270-T|Afu2g07590-T|Afu4g11140-T|Afu4g12990-T|Afu5g09100-T|Afu5g11580-T|Afu7g01270-T|Afu5g02290-T|Afu7g01320-T|Afu4g04502-T|Afu7g05180-T|Afu5g01630-T|Afu1g15440-T|Afu1g07620-T|Afu4g04280-T|Afu1g12690-T|Afu7g05910-T|Afu2g08540-T|Afu2g17810-T|Afu2g08780-T|Afu2g03520-T|Afu2g08840-T|Afu5g09560-T|Afu5g04060-T|Afu1g11170-T|Afu2g15790-T|Afu4g11620-T|Afu4g06490-T|Afu6g1053…	http://amigo.geneontology.org/cgi-bin/amigo/term_details?term=GO:0050896
nucleotide-excision repair	Gene Ontology	GO:0006289	8	27	0.0252994	Afu4g03840-T|Afu2g10820-T|Afu5g11580-T|Afu2g08540-T|Afu5g06690-T|Afu6g07500-T|Afu6g10530-T|Afu2g04860-T	http://amigo.geneontology.org/cgi-bin/amigo/term_details?term=GO:0006289
nucleic acid metabolic process	Gene Ontology	GO:0090304	124	887	0.0295365	Afu4g03840-T|Afu3g14040-T|Afu1g10480-T|Afu1g12570-T|Afu8g02700-T|Afu4g11140-T|Afu6g14130-T|Afu5g11580-T|Afu7g01270-T|Afu1g09350-T|Afu4g04502-T|Afu1g07620-T|Afu6g13130-T|Afu3g02380-T|Afu2g08540-T|Afu7g06550-T|Afu5g07530-T|Afu5g13790-T|Afu2g08840-T|Afu5g04060-T|Afu1g15910-T|Afu1g17460-T|Afu2g15790-T|Afu4g11620-T|Afu1g11170-T|Afu4g06490-T|Afu6g10530-T|Afu6g05070-T|Afu6g14150-T|Afu3g11960-T|Afu4g1052…	http://amigo.geneontology.org/cgi-bin/amigo/term_details?term=GO:0090304
interstrand cross-link repair	Gene Ontology	GO:0036297	4	8	0.0296722	Afu7g05280-T|Afu1g03050-T|Afu2g10820-T|Afu6g07500-T	http://amigo.geneontology.org/cgi-bin/amigo/term_details?term=GO:0036297
quinate catabolic process	Gene Ontology	GO:0019631	4	8	0.0296722	Afu1g11630-T|Afu1g11560-T|Afu1g11620-T|Afu8g02700-T	http://amigo.geneontology.org/cgi-bin/amigo/term_details?term=GO:0019631
oligopeptide transport	Gene Ontology	GO:0006857	4	8	0.0296722	Afu2g15240-T|Afu5g07970-T|Afu6g03140-T|Afu6g14210-T	http://amigo.geneontology.org/cgi-bin/amigo/term_details?term=GO:0006857
quinate metabolic process	Gene Ontology	GO:0019630	4	8	0.0296722	Afu1g11630-T|Afu1g11560-T|Afu1g11620-T|Afu8g02700-T	http://amigo.geneontology.org/cgi-bin/amigo/term_details?term=GO:0019630
nitrogen compound transport	Gene Ontology	GO:0071705	20	103	0.0301178	Afu3g07990-T|Afu1g07440-T|Afu2g15240-T|Afu5g10270-T|Afu1g04870-T|Afu5g00930-T|Afu1g05040-T|Afu2g04690-T|Afu5g07970-T|Afu2g08800-T|Afu6g03140-T|Afu1g13210-T|Afu5g11020-T|Afu7g05910-T|Afu2g00810-T|Afu3g01560-T|Afu4g09040-T|Afu5g01630-T|Afu6g14210-T|Afu1g12310-T	http://amigo.geneontology.org/cgi-bin/amigo/term_details?term=GO:0071705
response to chemical	Gene Ontology	GO:0042221	58	383	0.0385195	Afu4g06820-T|Afu5g07970-T|Afu2g08800-T|Afu5g10270-T|Afu6g10740-T|Afu2g07590-T|Afu2g02710-T|Afu5g09100-T|Afu3g14330-T|Afu6g11430-T|Afu6g04750-T|Afu2g11180-T|Afu3g10570-T|Afu1g01550-T|Afu3g01290-T|Afu5g07040-T|Afu5g12960-T|Afu2g15240-T|Afu8g04100-T|Afu3g08850-T|Afu5g02290-T|Afu3g13970-T|Afu3g00910-T|Afu7g01320-T|Afu6g14210-T|Afu6g04360-T|Afu2g15790-T|Afu5g01630-T|Afu1g15440-T|Afu2g10230-T|Afu5g0702…	http://amigo.geneontology.org/cgi-bin/amigo/term_details?term=GO:0042221
drug transmembrane transport	Gene Ontology	GO:0006855	4	9	0.0393984	Afu4g13660-T|Afu5g01630-T|Afu5g06070-T|Afu5g13170-T	http://amigo.geneontology.org/cgi-bin/amigo/term_details?term=GO:0006855
carboxylic acid transport	Gene Ontology	GO:0046942	8	30	0.039815	Afu3g07990-T|Afu8g04630-T|Afu5g00930-T|Afu2g08800-T|Afu5g07970-T|Afu3g01560-T|Afu1g04780-T|Afu4g09040-T	http://amigo.geneontology.org/cgi-bin/amigo/term_details?term=GO:0046942
negative regulation of G-protein coupled receptor protein signaling pathway	Gene Ontology	GO:0045744	3	5	0.042747	Afu6g10740-T|Afu2g11180-T|Afu5g00900-T	http://amigo.geneontology.org/cgi-bin/amigo/term_details?term=GO:0045744
allantoin metabolic process	Gene Ontology	GO:0000255	3	5	0.042747	Afu2g02250-T|Afu3g12560-T|Afu1g13210-T	http://amigo.geneontology.org/cgi-bin/amigo/term_details?term=GO:0000255
allantoin catabolic process	Gene Ontology	GO:0000256	3	5	0.042747	Afu2g02250-T|Afu3g12560-T|Afu1g13210-T	http://amigo.geneontology.org/cgi-bin/amigo/term_details?term=GO:0000256
regulation of nucleic acid-templated transcription	Gene Ontology	GO:1903506	62	420	0.0487132	Afu3g02920-T|Afu8g02700-T|Afu3g14040-T|Afu5g00950-T|Afu6g00120-T|Afu3g11960-T|Afu1g11620-T|Afu6g11430-T|Afu5g09890-T|Afu2g11180-T|Afu5g07510-T|Afu3g10570-T|Afu6g06535-T|Afu5g12960-T|Afu6g12160-T|Afu5g11580-T|Afu7g00770-T|Afu1g11630-T|Afu8g01940-T|Afu6g14130-T|Afu5g09090-T|Afu1g03860-T|Afu1g17150-T|Afu2g05380-T|Afu5g01650-T|Afu3g08630-T|Afu1g13310-T|Afu1g02590-T|Afu1g06720-T|Afu2g04600-T|Afu3g1056…	http://amigo.geneontology.org/cgi-bin/amigo/term_details?term=GO:1903506
regulation of RNA biosynthetic process	Gene Ontology	GO:2001141	62	420	0.0487132	Afu3g02920-T|Afu8g02700-T|Afu3g14040-T|Afu5g00950-T|Afu6g00120-T|Afu3g11960-T|Afu1g11620-T|Afu6g11430-T|Afu5g09890-T|Afu2g11180-T|Afu5g07510-T|Afu3g10570-T|Afu6g06535-T|Afu5g12960-T|Afu6g12160-T|Afu5g11580-T|Afu7g00770-T|Afu1g11630-T|Afu8g01940-T|Afu6g14130-T|Afu5g09090-T|Afu1g03860-T|Afu1g17150-T|Afu2g05380-T|Afu5g01650-T|Afu3g08630-T|Afu1g13310-T|Afu1g02590-T|Afu1g06720-T|Afu2g04600-T|Afu3g1056…	http://amigo.geneontology.org/cgi-bin/amigo/term_details?term=GO:2001141
regulation of transcription, DNA-templated	Gene Ontology	GO:0006355	62	420	0.0487132	Afu3g02920-T|Afu8g02700-T|Afu3g14040-T|Afu5g00950-T|Afu6g00120-T|Afu3g11960-T|Afu1g11620-T|Afu6g11430-T|Afu5g09890-T|Afu2g11180-T|Afu5g07510-T|Afu3g10570-T|Afu6g06535-T|Afu5g12960-T|Afu6g12160-T|Afu5g11580-T|Afu7g00770-T|Afu1g11630-T|Afu8g01940-T|Afu6g14130-T|Afu5g09090-T|Afu1g03860-T|Afu1g17150-T|Afu2g05380-T|Afu5g01650-T|Afu3g08630-T|Afu1g13310-T|Afu1g02590-T|Afu1g06720-T|Afu2g04600-T|Afu3g1056…	http://amigo.geneontology.org/cgi-bin/amigo/term_details?term=GO:0006355

## Sheet: GOdown xylP HS 60' vs xylP 30ºC
#Term	Database	ID	Input number	Background number	P-Value	Input	Hyperlink
organonitrogen compound biosynthetic process	Gene Ontology	GO:1901566	130	482	7.72021e-09	Afu1g16850-T|Afu8g00420-T|Afu8g00100-T|Afu1g04320-T|Afu1g06340-T|Afu6g12050-T|Afu2g16370-T|Afu2g03590-T|Afu6g11260-T|Afu1g16210-T|Afu2g09650-T|Afu1g06940-T|Afu1g11130-T|Afu4g07845-T|Afu4g06690-T|Afu2g03610-T|Afu1g03110-T|Afu4g13170-T|Afu6g12060-T|Afu6g12580-T|Afu5g02470-T|Afu6g12980-T|Afu2g02150-T|Afu5g13840-T|Afu5g11540-T|Afu1g12940-T|Afu8g07140-T|Afu1g04040-T|Afu8g06520-T|Afu1g06830-T|Afu7g0146…	http://amigo.geneontology.org/cgi-bin/amigo/term_details?term=GO:1901566
translation	Gene Ontology	GO:0006412	61	172	5.54963e-08	Afu1g05200-T|Afu1g15730-T|Afu4g07730-T|Afu8g00100-T|Afu7g02140-T|Afu1g04320-T|Afu1g05340-T|Afu1g06340-T|Afu5g05450-T|Afu5g03020-T|Afu1g09100-T|Afu4g07435-T|Afu2g16370-T|Afu2g10440-T|Afu1g04530-T|Afu2g03590-T|Afu2g10100-T|Afu6g11260-T|Afu3g06640-T|Afu1g05990-T|Afu1g11130-T|Afu4g07845-T|Afu7g04490-T|Afu5g06360-T|Afu1g05500-T|Afu4g13170-T|Afu5g11540-T|Afu8g07110-T|Afu1g04040-T|Afu3g06960-T|Afu1g0257…	http://amigo.geneontology.org/cgi-bin/amigo/term_details?term=GO:0006412
peptide biosynthetic process	Gene Ontology	GO:0043043	71	216	5.58337e-08	Afu1g05200-T|Afu1g15730-T|Afu4g07730-T|Afu8g00100-T|Afu6g12080-T|Afu7g02140-T|Afu1g04320-T|Afu6g13990-T|Afu1g05340-T|Afu1g06340-T|Afu5g05450-T|Afu5g03020-T|Afu1g09100-T|Afu4g07435-T|Afu6g12050-T|Afu2g16370-T|Afu2g10440-T|Afu1g04530-T|Afu2g03590-T|Afu2g10100-T|Afu6g11260-T|Afu3g06640-T|Afu1g05990-T|Afu1g11130-T|Afu4g07845-T|Afu3g13320-T|Afu7g04490-T|Afu5g06360-T|Afu1g05500-T|Afu4g13170-T|Afu5g1154…	http://amigo.geneontology.org/cgi-bin/amigo/term_details?term=GO:0043043
peptide metabolic process	Gene Ontology	GO:0006518	74	232	7.97155e-08	Afu1g05200-T|Afu1g15730-T|Afu1g11130-T|Afu8g00100-T|Afu6g12080-T|Afu7g02140-T|Afu1g04320-T|Afu4g07730-T|Afu3g13730-T|Afu6g13990-T|Afu1g05340-T|Afu1g06340-T|Afu5g05450-T|Afu5g03020-T|Afu1g09100-T|Afu4g07435-T|Afu6g12050-T|Afu2g16370-T|Afu2g10440-T|Afu1g04530-T|Afu2g03590-T|Afu2g10100-T|Afu6g11260-T|Afu3g06640-T|Afu1g05990-T|Afu3g14970-T|Afu5g04330-T|Afu4g07845-T|Afu7g04490-T|Afu5g06360-T|Afu1g0550…	http://amigo.geneontology.org/cgi-bin/amigo/term_details?term=GO:0006518
amide biosynthetic process	Gene Ontology	GO:0043604	74	235	1.21662e-07	Afu1g05200-T|Afu1g15730-T|Afu8g00420-T|Afu4g07730-T|Afu8g00100-T|Afu6g12080-T|Afu7g02140-T|Afu1g04320-T|Afu6g13990-T|Afu1g05340-T|Afu1g06340-T|Afu5g05450-T|Afu5g03020-T|Afu1g09100-T|Afu4g07435-T|Afu6g12050-T|Afu2g16370-T|Afu2g10440-T|Afu1g04530-T|Afu2g03590-T|Afu2g10100-T|Afu6g11260-T|Afu3g06640-T|Afu1g05990-T|Afu1g11130-T|Afu4g07845-T|Afu3g13320-T|Afu7g04490-T|Afu5g06360-T|Afu1g05500-T|Afu4g1317…	http://amigo.geneontology.org/cgi-bin/amigo/term_details?term=GO:0043604
cellular amide metabolic process	Gene Ontology	GO:0043603	78	271	1.11134e-06	Afu1g05200-T|Afu1g15730-T|Afu8g00420-T|Afu1g11130-T|Afu8g00100-T|Afu6g12080-T|Afu7g02140-T|Afu1g04320-T|Afu4g07730-T|Afu3g13730-T|Afu6g13990-T|Afu1g05340-T|Afu3g12120-T|Afu1g06340-T|Afu5g05450-T|Afu5g03020-T|Afu1g09100-T|Afu4g07435-T|Afu6g12050-T|Afu2g16370-T|Afu2g10440-T|Afu1g04530-T|Afu2g03590-T|Afu2g10100-T|Afu6g11260-T|Afu3g06640-T|Afu1g05990-T|Afu3g14970-T|Afu5g04330-T|Afu4g07845-T|Afu7g0449…	http://amigo.geneontology.org/cgi-bin/amigo/term_details?term=GO:0043603
organonitrogen compound metabolic process	Gene Ontology	GO:1901564	157	683	1.46095e-06	Afu1g16850-T|Afu8g00420-T|Afu3g12120-T|Afu8g00100-T|Afu1g04320-T|Afu6g08730-T|Afu1g06340-T|Afu6g12050-T|Afu2g16370-T|Afu2g03590-T|Afu6g11260-T|Afu1g16210-T|Afu2g09650-T|Afu1g06940-T|Afu5g04330-T|Afu4g07845-T|Afu4g06690-T|Afu2g03610-T|Afu1g03110-T|Afu4g09360-T|Afu4g13170-T|Afu3g09320-T|Afu6g12060-T|Afu6g12580-T|Afu8g01410-T|Afu5g02470-T|Afu7g02420-T|Afu6g12980-T|Afu2g02150-T|Afu7g04760-T|Afu5g1384…	http://amigo.geneontology.org/cgi-bin/amigo/term_details?term=GO:1901564
secondary metabolic process	Gene Ontology	GO:0019748	61	204	6.14342e-06	Afu4g09150-T|Afu8g00420-T|Afu3g12120-T|Afu2g17600-T|Afu6g03590-T|Afu4g14380-T|Afu6g12080-T|Afu4g00590-T|Afu3g12930-T|Afu8g00250-T|Afu6g13990-T|Afu2g07680-T|Afu8g00380-T|Afu6g12180-T|Afu5g13840-T|Afu8g00620-T|Afu6g12050-T|Afu2g17540-T|Afu2g17580-T|Afu2g17560-T|Afu4g00225-T|Afu8g00390-T|Afu8g00230-T|Afu8g00490-T|Afu8g00470-T|Afu4g14850-T|Afu8g00200-T|Afu8g00170-T|Afu8g00500-T|Afu6g09740-T|Afu6g1206…	http://amigo.geneontology.org/cgi-bin/amigo/term_details?term=GO:0019748
alkaloid biosynthetic process	Gene Ontology	GO:0009821	15	20	1.38674e-05	Afu3g12930-T|Afu6g12080-T|Afu2g17970-T|Afu2g17990-T|Afu2g18030-T|Afu8g00230-T|Afu2g17960-T|Afu8g00250-T|Afu6g13990-T|Afu2g18050-T|Afu6g12070-T|Afu8g00200-T|Afu8g00170-T|Afu6g12050-T|Afu6g12060-T	http://amigo.geneontology.org/cgi-bin/amigo/term_details?term=GO:0009821
ether biosynthetic process	Gene Ontology	GO:1901503	14	18	2.02039e-05	Afu8g00440-T|Afu8g00420-T|Afu8g00480-T|Afu8g00390-T|Afu8g00400-T|Afu8g00230-T|Afu8g00430-T|Afu8g00490-T|Afu8g00470-T|Afu8g00380-T|Afu8g00200-T|Afu8g00500-T|Afu8g00370-T|Afu8g00510-T	http://amigo.geneontology.org/cgi-bin/amigo/term_details?term=GO:1901503
alkaloid metabolic process	Gene Ontology	GO:0009820	16	24	2.06188e-05	Afu3g12930-T|Afu6g12080-T|Afu2g17970-T|Afu8g00620-T|Afu2g17990-T|Afu2g18030-T|Afu8g00230-T|Afu2g17960-T|Afu8g00250-T|Afu6g13990-T|Afu2g18050-T|Afu6g12070-T|Afu8g00200-T|Afu8g00170-T|Afu6g12050-T|Afu6g12060-T	http://amigo.geneontology.org/cgi-bin/amigo/term_details?term=GO:0009820
single-organism metabolic process	Gene Ontology	GO:0044710	273	1396	2.35982e-05	Afu4g09360-T|Afu8g00420-T|Afu3g12120-T|Afu2g17600-T|Afu8g00100-T|Afu1g16850-T|Afu5g01590-T|Afu1g08810-T|Afu4g05915-T|Afu2g17550-T|Afu3g12910-T|Afu5g02490-T|Afu2g13025-T|Afu2g11240-T|Afu6g03770-T|Afu8g01780-T|Afu7g06090-T|Afu1g17520-T|Afu2g17580-T|Afu1g03420-T|Afu8g05580-T|Afu1g16210-T|Afu2g09650-T|Afu1g06940-T|Afu3g13880-T|Afu7g02070-T|Afu1g14140-T|Afu1g17630-T|Afu8g00490-T|Afu2g03610-T|Afu8g0514…	http://amigo.geneontology.org/cgi-bin/amigo/term_details?term=GO:0044710
fumagillin biosynthetic process	Gene Ontology	GO:1902086	12	13	2.53749e-05	Afu8g00440-T|Afu8g00420-T|Afu8g00480-T|Afu8g00390-T|Afu8g00400-T|Afu8g00430-T|Afu8g00490-T|Afu8g00470-T|Afu8g00380-T|Afu8g00500-T|Afu8g00370-T|Afu8g00510-T	http://amigo.geneontology.org/cgi-bin/amigo/term_details?term=GO:1902086
epoxide metabolic process	Gene Ontology	GO:0097176	12	13	2.53749e-05	Afu8g00440-T|Afu8g00420-T|Afu8g00480-T|Afu8g00390-T|Afu8g00400-T|Afu8g00430-T|Afu8g00490-T|Afu8g00470-T|Afu8g00380-T|Afu8g00500-T|Afu8g00370-T|Afu8g00510-T	http://amigo.geneontology.org/cgi-bin/amigo/term_details?term=GO:0097176
fumagillin metabolic process	Gene Ontology	GO:1902084	12	13	2.53749e-05	Afu8g00440-T|Afu8g00420-T|Afu8g00480-T|Afu8g00390-T|Afu8g00400-T|Afu8g00430-T|Afu8g00490-T|Afu8g00470-T|Afu8g00380-T|Afu8g00500-T|Afu8g00370-T|Afu8g00510-T	http://amigo.geneontology.org/cgi-bin/amigo/term_details?term=GO:1902084
oxidation-reduction process	Gene Ontology	GO:0055114	131	589	4.38842e-05	Afu1g16850-T|Afu1g08810-T|Afu3g12120-T|Afu3g03560-T|Afu6g08730-T|Afu5g02490-T|Afu2g13025-T|Afu2g11240-T|Afu2g17430-T|Afu7g06090-T|Afu7g02070-T|Afu4g06690-T|Afu2g03610-T|Afu8g05140-T|Afu3g11840-T|Afu5g01030-T|Afu6g12060-T|Afu3g02840-T|Afu3g08070-T|Afu8g00920-T|Afu4g03410-T|Afu8g00190-T|Afu6g00510-T|Afu7g01980-T|Afu3g14880-T|Afu6g03770-T|Afu1g17520-T|Afu2g16630-T|Afu8g00220-T|Afu8g02310-T|Afu5g1042…	http://amigo.geneontology.org/cgi-bin/amigo/term_details?term=GO:0055114
small molecule biosynthetic process	Gene Ontology	GO:0044283	75	292	5.01805e-05	Afu3g12120-T|Afu1g16850-T|Afu3g06120-T|Afu8g00230-T|Afu2g17600-T|Afu6g07770-T|Afu4g10270-T|Afu2g11300-T|Afu8g06820-T|Afu3g08660-T|Afu8g00420-T|Afu8g00250-T|Afu6g13990-T|Afu2g07680-T|Afu8g00380-T|Afu6g04820-T|Afu5g09640-T|Afu2g15650-T|Afu4g09810-T|Afu2g10660-T|Afu5g04250-T|Afu2g17580-T|Afu7g05350-T|Afu2g17560-T|Afu3g14490-T|Afu2g09650-T|Afu4g00225-T|Afu4g07710-T|Afu3g11070-T|Afu8g00400-T|Afu3g1497…	http://amigo.geneontology.org/cgi-bin/amigo/term_details?term=GO:0044283
phenol-containing compound biosynthetic process	Gene Ontology	GO:0046189	20	42	7.92593e-05	Afu2g01290-T|Afu2g17560-T|Afu8g00370-T|Afu2g17600-T|Afu4g00225-T|Afu2g17580-T|Afu1g03195-T|Afu3g12930-T|Afu8g00250-T|Afu2g17550-T|Afu2g17990-T|Afu2g17530-T|Afu4g00220-T|Afu5g09640-T|Afu8g00620-T|Afu2g17540-T|Afu5g10310-T|Afu4g00210-T|Afu4g00230-T|Afu6g12060-T	http://amigo.geneontology.org/cgi-bin/amigo/term_details?term=GO:0046189
indole alkaloid metabolic process	Gene Ontology	GO:0035834	12	16	0.000101468	Afu6g12080-T|Afu2g18050-T|Afu2g18030-T|Afu8g00230-T|Afu2g17960-T|Afu8g00250-T|Afu6g13990-T|Afu6g12070-T|Afu8g00200-T|Afu8g00170-T|Afu6g12050-T|Afu6g12060-T	http://amigo.geneontology.org/cgi-bin/amigo/term_details?term=GO:0035834
indole alkaloid biosynthetic process	Gene Ontology	GO:0035835	12	16	0.000101468	Afu6g12080-T|Afu2g18050-T|Afu2g18030-T|Afu8g00230-T|Afu2g17960-T|Afu8g00250-T|Afu6g13990-T|Afu6g12070-T|Afu8g00200-T|Afu8g00170-T|Afu6g12050-T|Afu6g12060-T	http://amigo.geneontology.org/cgi-bin/amigo/term_details?term=GO:0035835
organic hydroxy compound biosynthetic process	Gene Ontology	GO:1901617	35	106	0.000119435	Afu2g17600-T|Afu6g13990-T|Afu2g07680-T|Afu2g17540-T|Afu2g17580-T|Afu2g17560-T|Afu2g10660-T|Afu4g00225-T|Afu3g11070-T|Afu8g00230-T|Afu8g00200-T|Afu4g11500-T|Afu4g03630-T|Afu1g04540-T|Afu1g03195-T|Afu8g00370-T|Afu8g00620-T|Afu2g17990-T|Afu2g18030-T|Afu2g01290-T|Afu5g07780-T|Afu6g12070-T|Afu4g00230-T|Afu3g12930-T|Afu2g17550-T|Afu8g00910-T|Afu4g00210-T|Afu2g18050-T|Afu8g00250-T|Afu5g09640-T|Afu2g1753…	http://amigo.geneontology.org/cgi-bin/amigo/term_details?term=GO:1901617
ether metabolic process	Gene Ontology	GO:0018904	15	26	0.000125236	Afu8g00440-T|Afu8g00420-T|Afu8g00480-T|Afu8g00390-T|Afu8g00400-T|Afu3g14970-T|Afu8g00230-T|Afu8g00430-T|Afu8g00490-T|Afu8g00470-T|Afu8g00380-T|Afu8g00200-T|Afu8g00500-T|Afu8g00370-T|Afu8g00510-T	http://amigo.geneontology.org/cgi-bin/amigo/term_details?term=GO:0018904
single-organism biosynthetic process	Gene Ontology	GO:0044711	127	584	0.000133574	Afu1g16850-T|Afu8g00420-T|Afu3g12120-T|Afu2g17600-T|Afu6g03590-T|Afu2g17550-T|Afu2g11240-T|Afu6g12050-T|Afu2g17580-T|Afu2g09650-T|Afu1g06940-T|Afu1g14140-T|Afu8g00490-T|Afu2g03610-T|Afu4g11500-T|Afu6g12060-T|Afu6g12580-T|Afu3g15090-T|Afu3g08070-T|Afu6g12980-T|Afu4g03410-T|Afu5g13840-T|Afu3g06410-T|Afu4g03630-T|Afu4g00210-T|Afu7g03940-T|Afu8g07140-T|Afu4g04270-T|Afu8g00850-T|Afu3g08660-T|Afu8g0048…	http://amigo.geneontology.org/cgi-bin/amigo/term_details?term=GO:0044711
phenol-containing compound metabolic process	Gene Ontology	GO:0018958	21	48	0.000136043	Afu2g01290-T|Afu2g17560-T|Afu8g00370-T|Afu2g17600-T|Afu4g00225-T|Afu2g17580-T|Afu1g03195-T|Afu3g12930-T|Afu8g00250-T|Afu2g17550-T|Afu2g17990-T|Afu2g17530-T|Afu4g01380-T|Afu5g09640-T|Afu8g00620-T|Afu4g00220-T|Afu2g17540-T|Afu5g10310-T|Afu4g00210-T|Afu4g00230-T|Afu6g12060-T	http://amigo.geneontology.org/cgi-bin/amigo/term_details?term=GO:0018958
secondary metabolite biosynthetic process	Gene Ontology	GO:0044550	47	164	0.000160831	Afu4g09150-T|Afu4g00590-T|Afu3g12120-T|Afu2g17600-T|Afu6g03590-T|Afu6g13990-T|Afu2g07680-T|Afu6g12180-T|Afu3g14920-T|Afu6g12050-T|Afu2g17540-T|Afu2g17580-T|Afu2g17560-T|Afu4g00225-T|Afu8g00230-T|Afu3g12930-T|Afu8g00200-T|Afu8g00170-T|Afu6g09740-T|Afu6g12060-T|Afu6g12080-T|Afu8g00370-T|Afu8g00620-T|Afu3g12910-T|Afu3g08070-T|Afu2g17990-T|Afu2g18030-T|Afu2g17960-T|Afu4g03410-T|Afu2g01290-T|Afu6g0973…	http://amigo.geneontology.org/cgi-bin/amigo/term_details?term=GO:0044550
ketone biosynthetic process	Gene Ontology	GO:0042181	22	59	0.000571589	Afu3g06120-T|Afu2g17600-T|Afu4g00590-T|Afu8g00620-T|Afu2g17580-T|Afu2g17560-T|Afu4g00225-T|Afu1g03195-T|Afu8g00370-T|Afu4g09810-T|Afu2g17990-T|Afu2g01290-T|Afu6g12070-T|Afu3g06410-T|Afu4g00230-T|Afu3g12930-T|Afu8g00910-T|Afu4g00210-T|Afu8g00250-T|Afu4g00220-T|Afu6g12060-T|Afu5g10310-T	http://amigo.geneontology.org/cgi-bin/amigo/term_details?term=GO:0042181
rRNA export from nucleus	Gene Ontology	GO:0006407	8	9	0.000707592	Afu2g10090-T|Afu1g06770-T|Afu7g04490-T|Afu1g05340-T|Afu3g13320-T|Afu1g05630-T|Afu7g01460-T|Afu6g12660-T	http://amigo.geneontology.org/cgi-bin/amigo/term_details?term=GO:0006407
rRNA transport	Gene Ontology	GO:0051029	8	9	0.000707592	Afu2g10090-T|Afu1g06770-T|Afu7g04490-T|Afu1g05340-T|Afu3g13320-T|Afu1g05630-T|Afu7g01460-T|Afu6g12660-T	http://amigo.geneontology.org/cgi-bin/amigo/term_details?term=GO:0051029
mitotic sister chromatid segregation	Gene Ontology	GO:0000070	24	71	0.00102117	Afu8g05680-T|Afu3g09370-T|Afu3g11010-T|Afu4g11160-T|Afu2g07550-T|Afu7g01400-T|Afu3g05530-T|Afu2g16080-T|Afu2g05850-T|Afu7g03890-T|Afu6g02670-T|Afu2g02170-T|Afu4g12160-T|Afu3g09560-T|Afu6g12980-T|Afu1g13790-T|Afu2g11110-T|Afu6g11470-T|Afu1g07400-T|Afu7g00250-T|Afu1g14730-T|Afu6g08530-T|Afu3g12250-T|Afu6g08120-T	http://amigo.geneontology.org/cgi-bin/amigo/term_details?term=GO:0000070
sister chromatid segregation	Gene Ontology	GO:0000819	25	76	0.00111318	Afu8g05680-T|Afu3g09370-T|Afu3g11010-T|Afu4g11160-T|Afu2g07550-T|Afu7g01400-T|Afu3g05530-T|Afu2g16080-T|Afu2g05850-T|Afu7g03890-T|Afu6g02670-T|Afu2g02170-T|Afu4g12160-T|Afu3g09560-T|Afu6g12980-T|Afu1g13790-T|Afu2g11110-T|Afu6g11470-T|Afu1g07400-T|Afu7g00250-T|Afu1g14730-T|Afu6g08530-T|Afu3g12250-T|Afu6g08120-T|Afu5g03610-T	http://amigo.geneontology.org/cgi-bin/amigo/term_details?term=GO:0000819
organic hydroxy compound metabolic process	Gene Ontology	GO:1901615	39	143	0.00122975	Afu1g16850-T|Afu2g17600-T|Afu6g13990-T|Afu2g07680-T|Afu8g02590-T|Afu2g17540-T|Afu2g17580-T|Afu2g17560-T|Afu2g10660-T|Afu4g00225-T|Afu3g11070-T|Afu8g00230-T|Afu4g01380-T|Afu8g00200-T|Afu4g11500-T|Afu4g03630-T|Afu1g04540-T|Afu1g03195-T|Afu8g00370-T|Afu8g00620-T|Afu2g17990-T|Afu2g18030-T|Afu8g00910-T|Afu2g01290-T|Afu5g07780-T|Afu6g12070-T|Afu4g00230-T|Afu3g12930-T|Afu2g17550-T|Afu4g11310-T|Afu4g0021…	http://amigo.geneontology.org/cgi-bin/amigo/term_details?term=GO:1901615
small molecule metabolic process	Gene Ontology	GO:0044281	134	667	0.00147204	Afu1g16850-T|Afu8g00420-T|Afu3g12120-T|Afu2g17600-T|Afu8g00100-T|Afu6g08730-T|Afu7g06090-T|Afu6g03590-T|Afu1g16210-T|Afu2g09650-T|Afu1g06940-T|Afu1g03420-T|Afu8g00490-T|Afu2g03610-T|Afu4g11500-T|Afu4g13170-T|Afu5g01030-T|Afu3g09320-T|Afu6g12060-T|Afu6g12580-T|Afu3g15090-T|Afu5g02470-T|Afu7g02420-T|Afu7g05800-T|Afu5g13840-T|Afu3g06410-T|Afu4g03630-T|Afu4g00210-T|Afu5g10420-T|Afu8g07140-T|Afu4g0427…	http://amigo.geneontology.org/cgi-bin/amigo/term_details?term=GO:0044281
chromosome segregation	Gene Ontology	GO:0007059	28	92	0.00154153	Afu8g05680-T|Afu3g09370-T|Afu3g11010-T|Afu4g11160-T|Afu2g07550-T|Afu7g01400-T|Afu3g05530-T|Afu2g16080-T|Afu2g05850-T|Afu3g13950-T|Afu7g03890-T|Afu1g14730-T|Afu6g02670-T|Afu2g02170-T|Afu4g12160-T|Afu3g09560-T|Afu6g12980-T|Afu1g13790-T|Afu2g11110-T|Afu6g11470-T|Afu1g07400-T|Afu1g08795-T|Afu7g00250-T|Afu1g07320-T|Afu6g08530-T|Afu3g12250-T|Afu6g08120-T|Afu5g03610-T	http://amigo.geneontology.org/cgi-bin/amigo/term_details?term=GO:0007059
nuclear chromosome segregation	Gene Ontology	GO:0098813	26	86	0.00240466	Afu8g05680-T|Afu3g09370-T|Afu3g11010-T|Afu4g11160-T|Afu2g07550-T|Afu7g01400-T|Afu3g05530-T|Afu2g16080-T|Afu2g05850-T|Afu7g03890-T|Afu6g02670-T|Afu2g02170-T|Afu4g12160-T|Afu3g09560-T|Afu6g12980-T|Afu1g13790-T|Afu2g11110-T|Afu6g11470-T|Afu1g07400-T|Afu1g08795-T|Afu7g00250-T|Afu1g14730-T|Afu6g08530-T|Afu3g12250-T|Afu6g08120-T|Afu5g03610-T	http://amigo.geneontology.org/cgi-bin/amigo/term_details?term=GO:0098813
organic acid biosynthetic process	Gene Ontology	GO:0016053	46	186	0.00256198	Afu1g16850-T|Afu8g00420-T|Afu3g12120-T|Afu6g07770-T|Afu4g10270-T|Afu2g11300-T|Afu3g08660-T|Afu8g00370-T|Afu3g14490-T|Afu8g00380-T|Afu2g15650-T|Afu6g04820-T|Afu5g04250-T|Afu2g17580-T|Afu7g05350-T|Afu2g17560-T|Afu4g00225-T|Afu4g07360-T|Afu3g14970-T|Afu8g00490-T|Afu8g00470-T|Afu8g00500-T|Afu2g14210-T|Afu2g12470-T|Afu6g12060-T|Afu6g12580-T|Afu2g04310-T|Afu8g00390-T|Afu8g00480-T|Afu2g01290-T|Afu5g1384…	http://amigo.geneontology.org/cgi-bin/amigo/term_details?term=GO:0016053
organic substance biosynthetic process	Gene Ontology	GO:1901576	237	1314	0.00469064	Afu4g09360-T|Afu8g00420-T|Afu5g01272-T|Afu2g17600-T|Afu8g00100-T|Afu1g16850-T|Afu1g04320-T|Afu8g05460-T|Afu2g17550-T|Afu3g12120-T|Afu1g06340-T|Afu2g11240-T|Afu5g13840-T|Afu6g12050-T|Afu2g16370-T|Afu2g17580-T|Afu2g03590-T|Afu6g11260-T|Afu1g16210-T|Afu2g09650-T|Afu1g06940-T|Afu1g11130-T|Afu4g07845-T|Afu1g14140-T|Afu8g00490-T|Afu4g04390-T|Afu3g14010-T|Afu2g03610-T|Afu2g12250-T|Afu1g03110-T|Afu4g1150…	http://amigo.geneontology.org/cgi-bin/amigo/term_details?term=GO:1901576
organic acid metabolic process	Gene Ontology	GO:0006082	82	392	0.00493586	Afu1g16850-T|Afu8g00420-T|Afu3g12120-T|Afu6g07770-T|Afu4g10270-T|Afu2g11300-T|Afu3g08660-T|Afu8g00100-T|Afu8g00370-T|Afu4g07710-T|Afu3g14490-T|Afu8g00380-T|Afu2g15650-T|Afu6g04820-T|Afu7g06090-T|Afu3g13880-T|Afu5g04250-T|Afu8g05580-T|Afu2g17580-T|Afu7g05350-T|Afu2g17560-T|Afu5g09970-T|Afu2g09650-T|Afu4g00225-T|Afu2g08280-T|Afu1g16210-T|Afu3g11070-T|Afu5g09450-T|Afu3g14970-T|Afu6g03590-T|Afu8g0602…	http://amigo.geneontology.org/cgi-bin/amigo/term_details?term=GO:0006082
cellular biosynthetic process	Gene Ontology	GO:0044249	234	1301	0.00557149	Afu1g16850-T|Afu8g00420-T|Afu5g01272-T|Afu2g17600-T|Afu8g00100-T|Afu1g04320-T|Afu8g05460-T|Afu2g17550-T|Afu3g12120-T|Afu1g06340-T|Afu2g11240-T|Afu5g13840-T|Afu6g12050-T|Afu2g16370-T|Afu2g17580-T|Afu2g03590-T|Afu6g11260-T|Afu1g16210-T|Afu2g09650-T|Afu1g06940-T|Afu1g11130-T|Afu4g07845-T|Afu1g14140-T|Afu8g00490-T|Afu4g04390-T|Afu3g14010-T|Afu2g03610-T|Afu2g12250-T|Afu1g03110-T|Afu4g11500-T|Afu4g1317…	http://amigo.geneontology.org/cgi-bin/amigo/term_details?term=GO:0044249
biosynthetic process	Gene Ontology	GO:0009058	247	1382	0.0057352	Afu4g09360-T|Afu8g00420-T|Afu5g01272-T|Afu2g17600-T|Afu8g00100-T|Afu4g09150-T|Afu1g04320-T|Afu8g05460-T|Afu2g17550-T|Afu3g12910-T|Afu1g06340-T|Afu2g11240-T|Afu5g13840-T|Afu6g12050-T|Afu2g16370-T|Afu2g17580-T|Afu2g03590-T|Afu6g11260-T|Afu1g16210-T|Afu2g09650-T|Afu1g06940-T|Afu1g11130-T|Afu4g07845-T|Afu1g14140-T|Afu8g00490-T|Afu4g04390-T|Afu3g14010-T|Afu2g03610-T|Afu2g12250-T|Afu1g03110-T|Afu4g1150…	http://amigo.geneontology.org/cgi-bin/amigo/term_details?term=GO:0009058
nucleoside diphosphate metabolic process	Gene Ontology	GO:0009132	9	18	0.0058249	Afu4g00960-T|Afu1g07530-T|Afu5g12350-T|Afu4g06690-T|Afu3g11070-T|Afu6g02230-T|Afu5g06240-T|Afu5g13840-T|Afu5g03460-T	http://amigo.geneontology.org/cgi-bin/amigo/term_details?term=GO:0009132
2'-deoxyribonucleotide metabolic process	Gene Ontology	GO:0009394	6	8	0.00598864	Afu3g14580-T|Afu5g12350-T|Afu1g02890-T|Afu4g06690-T|Afu5g03460-T|Afu4g04270-T	http://amigo.geneontology.org/cgi-bin/amigo/term_details?term=GO:0009394
deoxyribose phosphate metabolic process	Gene Ontology	GO:0019692	6	8	0.00598864	Afu3g14580-T|Afu5g12350-T|Afu1g02890-T|Afu4g06690-T|Afu5g03460-T|Afu4g04270-T	http://amigo.geneontology.org/cgi-bin/amigo/term_details?term=GO:0019692
pyrimidine deoxyribonucleotide metabolic process	Gene Ontology	GO:0009219	6	8	0.00598864	Afu3g14580-T|Afu5g12350-T|Afu1g02890-T|Afu4g06690-T|Afu5g03460-T|Afu4g04270-T	http://amigo.geneontology.org/cgi-bin/amigo/term_details?term=GO:0009219
metabolic process	Gene Ontology	GO:0008152	522	3127	0.00656105	Afu1g08810-T|Afu5g01590-T|Afu8g05460-T|Afu2g11240-T|Afu6g07770-T|Afu2g16370-T|Afu4g13780-T|Afu2g09650-T|Afu1g09754-T|Afu4g07845-T|Afu8g00490-T|Afu6g02300-T|Afu6g03980-T|Afu8g05140-T|Afu4g13170-T|Afu3g02840-T|Afu8g01410-T|Afu4g08410-T|Afu7g05800-T|Afu4g03410-T|Afu7g01980-T|Afu7g06610-T|Afu8g00220-T|Afu2g09060-T|Afu6g03290-T|Afu3g03560-T|Afu1g07400-T|Afu1g04040-T|Afu7g06100-T|Afu1g15620-T|Afu1g0160…	http://amigo.geneontology.org/cgi-bin/amigo/term_details?term=GO:0008152
cellular ketone metabolic process	Gene Ontology	GO:0042180	25	90	0.00710485	Afu3g06120-T|Afu2g17600-T|Afu4g00590-T|Afu8g00620-T|Afu2g17580-T|Afu2g17560-T|Afu4g00225-T|Afu4g13170-T|Afu1g03195-T|Afu8g00370-T|Afu4g09810-T|Afu2g17990-T|Afu4g09830-T|Afu2g01290-T|Afu6g12070-T|Afu3g06410-T|Afu4g00230-T|Afu3g12930-T|Afu8g00910-T|Afu4g00210-T|Afu5g09640-T|Afu8g00250-T|Afu4g00220-T|Afu6g12060-T|Afu5g10310-T	http://amigo.geneontology.org/cgi-bin/amigo/term_details?term=GO:0042180
pyrimidine-containing compound metabolic process	Gene Ontology	GO:0072527	11	27	0.00794027	Afu6g08360-T|Afu5g02470-T|Afu3g14580-T|Afu1g02890-T|Afu5g12350-T|Afu8g00850-T|Afu8g02770-T|Afu4g06690-T|Afu1g15830-T|Afu5g03460-T|Afu4g04270-T	http://amigo.geneontology.org/cgi-bin/amigo/term_details?term=GO:0072527
microtubule polymerization or depolymerization	Gene Ontology	GO:0031109	7	12	0.00799713	Afu1g13390-T|Afu3g09370-T|Afu6g12980-T|Afu7g00250-T|Afu2g03150-T|Afu6g08660-T|Afu1g02550-T	http://amigo.geneontology.org/cgi-bin/amigo/term_details?term=GO:0031109
pigment biosynthetic process	Gene Ontology	GO:0046148	13	36	0.00901475	Afu2g17560-T|Afu1g05060-T|Afu4g07360-T|Afu6g12980-T|Afu7g01430-T|Afu2g17550-T|Afu2g17530-T|Afu3g13120-T|Afu1g07480-T|Afu2g17540-T|Afu7g02310-T|Afu2g17600-T|Afu2g17580-T	http://amigo.geneontology.org/cgi-bin/amigo/term_details?term=GO:0046148
ribonucleoside diphosphate metabolic process	Gene Ontology	GO:0009185	8	16	0.00918612	Afu4g00960-T|Afu1g07530-T|Afu5g12350-T|Afu4g06690-T|Afu3g11070-T|Afu6g02230-T|Afu5g06240-T|Afu5g13840-T	http://amigo.geneontology.org/cgi-bin/amigo/term_details?term=GO:0009185
cytoplasmic translation	Gene Ontology	GO:0002181	12	32	0.00945323	Afu2g10100-T|Afu5g06360-T|Afu1g12940-T|Afu1g11130-T|Afu6g13250-T|Afu3g08640-T|Afu3g13320-T|Afu1g05080-T|Afu1g09100-T|Afu1g03110-T|Afu1g06830-T|Afu4g07435-T	http://amigo.geneontology.org/cgi-bin/amigo/term_details?term=GO:0002181
DNA strand elongation involved in DNA replication	Gene Ontology	GO:0006271	8	17	0.0119841	Afu2g09060-T|Afu3g14010-T|Afu3g09560-T|Afu3g06060-T|Afu1g07320-T|Afu2g16600-T|Afu2g12250-T|Afu4g07970-T	http://amigo.geneontology.org/cgi-bin/amigo/term_details?term=GO:0006271
cell cycle DNA replication	Gene Ontology	GO:0044786	10	25	0.0122809	Afu2g10730-T|Afu2g09060-T|Afu1g12940-T|Afu3g09560-T|Afu5g02520-T|Afu3g06060-T|Afu1g07320-T|Afu4g07970-T|Afu3g14010-T|Afu1g15310-T	http://amigo.geneontology.org/cgi-bin/amigo/term_details?term=GO:0044786
nuclear DNA replication	Gene Ontology	GO:0033260	10	25	0.0122809	Afu2g10730-T|Afu2g09060-T|Afu1g12940-T|Afu3g09560-T|Afu5g02520-T|Afu3g06060-T|Afu1g07320-T|Afu4g07970-T|Afu3g14010-T|Afu1g15310-T	http://amigo.geneontology.org/cgi-bin/amigo/term_details?term=GO:0033260
pyruvate metabolic process	Gene Ontology	GO:0006090	9	21	0.012356	Afu7g02420-T|Afu3g11070-T|Afu7g05720-T|Afu4g00960-T|Afu4g07710-T|Afu6g02230-T|Afu5g06240-T|Afu5g13840-T|Afu5g14790-T	http://amigo.geneontology.org/cgi-bin/amigo/term_details?term=GO:0006090
deoxyribonucleotide metabolic process	Gene Ontology	GO:0009262	6	10	0.01266	Afu3g14580-T|Afu5g12350-T|Afu1g02890-T|Afu4g06690-T|Afu5g03460-T|Afu4g04270-T	http://amigo.geneontology.org/cgi-bin/amigo/term_details?term=GO:0009262
melanin biosynthetic process	Gene Ontology	GO:0042438	6	10	0.01266	Afu2g17560-T|Afu2g17600-T|Afu2g17550-T|Afu2g17530-T|Afu2g17540-T|Afu2g17580-T	http://amigo.geneontology.org/cgi-bin/amigo/term_details?term=GO:0042438
DNA packaging	Gene Ontology	GO:0006323	13	38	0.0127404	Afu3g05530-T|Afu3g06070-T|Afu2g11110-T|Afu1g12940-T|Afu3g11010-T|Afu1g13790-T|Afu5g02910-T|Afu3g05350-T|Afu1g13780-T|Afu2g07550-T|Afu7g03890-T|Afu6g02670-T|Afu2g02170-T	http://amigo.geneontology.org/cgi-bin/amigo/term_details?term=GO:0006323
mitotic nuclear division	Gene Ontology	GO:0007067	25	96	0.0135606	Afu8g05680-T|Afu3g09370-T|Afu3g11010-T|Afu4g11160-T|Afu2g07550-T|Afu7g01400-T|Afu3g05530-T|Afu2g16080-T|Afu2g05850-T|Afu7g03890-T|Afu6g02670-T|Afu2g02170-T|Afu1g13390-T|Afu4g12160-T|Afu3g09560-T|Afu6g12980-T|Afu1g13790-T|Afu2g11110-T|Afu6g11470-T|Afu1g07400-T|Afu7g00250-T|Afu1g14730-T|Afu6g08530-T|Afu3g12250-T|Afu6g08120-T	http://amigo.geneontology.org/cgi-bin/amigo/term_details?term=GO:0007067
eukaryotic translation initiation factor 3 complex, eIF3m	Gene Ontology	GO:0071541	5	7	0.0138974	Afu2g09870-T|Afu1g05200-T|Afu1g02030-T|Afu2g14670-T|Afu3g08640-T	http://amigo.geneontology.org/cgi-bin/amigo/term_details?term=GO:0071541
benzene-containing compound metabolic process	Gene Ontology	GO:0042537	11	30	0.0144069	Afu2g17560-T|Afu8g00370-T|Afu4g00210-T|Afu2g17580-T|Afu4g09830-T|Afu2g01290-T|Afu5g09640-T|Afu4g00220-T|Afu1g03195-T|Afu5g10310-T|Afu6g12060-T	http://amigo.geneontology.org/cgi-bin/amigo/term_details?term=GO:0042537
DNA replication	Gene Ontology	GO:0006260	18	62	0.0144678	Afu4g06690-T|Afu1g03920-T|Afu1g12940-T|Afu1g07530-T|Afu5g02520-T|Afu2g10730-T|Afu3g09560-T|Afu5g01600-T|Afu3g06060-T|Afu4g04390-T|Afu1g07320-T|Afu2g09060-T|Afu2g12250-T|Afu2g16600-T|Afu4g07970-T|Afu1g03410-T|Afu3g14010-T|Afu1g15310-T	http://amigo.geneontology.org/cgi-bin/amigo/term_details?term=GO:0006260
pyrimidine nucleotide metabolic process	Gene Ontology	GO:0006220	7	14	0.014574	Afu3g14580-T|Afu5g12350-T|Afu8g00850-T|Afu1g02890-T|Afu4g06690-T|Afu5g03460-T|Afu4g04270-T	http://amigo.geneontology.org/cgi-bin/amigo/term_details?term=GO:0006220
DNA strand elongation	Gene Ontology	GO:0022616	8	18	0.0153609	Afu2g09060-T|Afu3g14010-T|Afu3g09560-T|Afu3g06060-T|Afu1g07320-T|Afu2g16600-T|Afu2g12250-T|Afu4g07970-T	http://amigo.geneontology.org/cgi-bin/amigo/term_details?term=GO:0022616
monodictyphenone biosynthetic process	Gene Ontology	GO:1900815	9	22	0.0154291	Afu2g17560-T|Afu8g00370-T|Afu4g00210-T|Afu2g17580-T|Afu2g01290-T|Afu4g00220-T|Afu1g03195-T|Afu5g10310-T|Afu6g12060-T	http://amigo.geneontology.org/cgi-bin/amigo/term_details?term=GO:1900815
monodictyphenone metabolic process	Gene Ontology	GO:1900813	9	22	0.0154291	Afu2g17560-T|Afu8g00370-T|Afu4g00210-T|Afu2g17580-T|Afu2g01290-T|Afu4g00220-T|Afu1g03195-T|Afu5g10310-T|Afu6g12060-T	http://amigo.geneontology.org/cgi-bin/amigo/term_details?term=GO:1900813
DNA conformation change	Gene Ontology	GO:0071103	14	44	0.0161149	Afu3g05530-T|Afu2g09060-T|Afu3g06070-T|Afu2g11110-T|Afu1g12940-T|Afu3g11010-T|Afu1g13790-T|Afu5g02910-T|Afu3g05350-T|Afu1g13780-T|Afu2g07550-T|Afu7g03890-T|Afu6g02670-T|Afu2g02170-T	http://amigo.geneontology.org/cgi-bin/amigo/term_details?term=GO:0071103
chromosome condensation	Gene Ontology	GO:0030261	6	11	0.0174308	Afu3g05530-T|Afu2g11110-T|Afu2g07550-T|Afu7g03890-T|Afu6g02670-T|Afu2g02170-T	http://amigo.geneontology.org/cgi-bin/amigo/term_details?term=GO:0030261
melanin metabolic process	Gene Ontology	GO:0006582	6	11	0.0174308	Afu2g17560-T|Afu2g17600-T|Afu2g17550-T|Afu2g17530-T|Afu2g17540-T|Afu2g17580-T	http://amigo.geneontology.org/cgi-bin/amigo/term_details?term=GO:0006582
diol metabolic process	Gene Ontology	GO:0034311	7	15	0.0190049	Afu1g16850-T|Afu8g00370-T|Afu8g00230-T|Afu8g00910-T|Afu2g01290-T|Afu6g12070-T|Afu8g00200-T	http://amigo.geneontology.org/cgi-bin/amigo/term_details?term=GO:0034311
pyrimidine-containing compound biosynthetic process	Gene Ontology	GO:0072528	9	23	0.0190283	Afu5g02470-T|Afu8g00850-T|Afu5g12350-T|Afu6g08360-T|Afu8g02770-T|Afu4g06690-T|Afu1g15830-T|Afu5g03460-T|Afu4g04270-T	http://amigo.geneontology.org/cgi-bin/amigo/term_details?term=GO:0072528
DNA replication initiation	Gene Ontology	GO:0006270	8	19	0.0193761	Afu2g10730-T|Afu2g09060-T|Afu1g07530-T|Afu3g09560-T|Afu5g02520-T|Afu3g14010-T|Afu1g03920-T|Afu1g15310-T	http://amigo.geneontology.org/cgi-bin/amigo/term_details?term=GO:0006270
mitotic chromosome condensation	Gene Ontology	GO:0007076	5	8	0.0201798	Afu3g05530-T|Afu7g03890-T|Afu6g02670-T|Afu2g02170-T|Afu2g11110-T	http://amigo.geneontology.org/cgi-bin/amigo/term_details?term=GO:0007076
eukaryotic translation initiation factor 3 complex, eIF3e	Gene Ontology	GO:0071540	5	8	0.0201798	Afu2g09870-T|Afu1g05200-T|Afu1g02030-T|Afu2g14670-T|Afu3g08640-T	http://amigo.geneontology.org/cgi-bin/amigo/term_details?term=GO:0071540
ribosomal small subunit assembly	Gene Ontology	GO:0000028	5	8	0.0201798	Afu7g04490-T|Afu3g13320-T|Afu2g10440-T|Afu3g11260-T|Afu3g06640-T	http://amigo.geneontology.org/cgi-bin/amigo/term_details?term=GO:0000028
pigment metabolic process	Gene Ontology	GO:0042440	13	41	0.0204181	Afu2g17560-T|Afu1g05060-T|Afu4g07360-T|Afu6g12980-T|Afu7g01430-T|Afu2g17550-T|Afu2g17530-T|Afu3g13120-T|Afu1g07480-T|Afu2g17540-T|Afu7g02310-T|Afu2g17600-T|Afu2g17580-T	http://amigo.geneontology.org/cgi-bin/amigo/term_details?term=GO:0042440
maturation of SSU-rRNA	Gene Ontology	GO:0030490	13	41	0.0204181	Afu2g03590-T|Afu2g02150-T|Afu3g06640-T|Afu7g02140-T|Afu1g09440-T|Afu1g04320-T|Afu2g10500-T|Afu7g04490-T|Afu3g13320-T|Afu5g05450-T|Afu4g10800-T|Afu3g11260-T|Afu2g10440-T	http://amigo.geneontology.org/cgi-bin/amigo/term_details?term=GO:0030490
premeiotic DNA replication	Gene Ontology	GO:0006279	4	5	0.0216867	Afu4g07970-T|Afu3g09560-T|Afu2g09060-T|Afu2g10730-T	http://amigo.geneontology.org/cgi-bin/amigo/term_details?term=GO:0006279
deoxyribose phosphate biosynthetic process	Gene Ontology	GO:0046385	4	5	0.0216867	Afu5g12350-T|Afu4g06690-T|Afu5g03460-T|Afu4g04270-T	http://amigo.geneontology.org/cgi-bin/amigo/term_details?term=GO:0046385
2'-deoxyribonucleotide biosynthetic process	Gene Ontology	GO:0009265	4	5	0.0216867	Afu5g12350-T|Afu4g06690-T|Afu5g03460-T|Afu4g04270-T	http://amigo.geneontology.org/cgi-bin/amigo/term_details?term=GO:0009265
pyrimidine deoxyribonucleotide biosynthetic process	Gene Ontology	GO:0009221	4	5	0.0216867	Afu5g12350-T|Afu4g06690-T|Afu5g03460-T|Afu4g04270-T	http://amigo.geneontology.org/cgi-bin/amigo/term_details?term=GO:0009221
deoxyribonucleotide biosynthetic process	Gene Ontology	GO:0009263	4	5	0.0216867	Afu5g12350-T|Afu4g06690-T|Afu5g03460-T|Afu4g04270-T	http://amigo.geneontology.org/cgi-bin/amigo/term_details?term=GO:0009263
quinone biosynthetic process	Gene Ontology	GO:1901663	10	28	0.0219482	Afu3g06120-T|Afu4g09810-T|Afu4g00225-T|Afu4g00590-T|Afu4g00220-T|Afu3g06410-T|Afu4g00230-T|Afu5g10310-T|Afu4g00210-T|Afu1g03195-T	http://amigo.geneontology.org/cgi-bin/amigo/term_details?term=GO:1901663
organic heteropentacyclic compound biosynthetic process	Gene Ontology	GO:1901378	15	51	0.0222498	Afu2g17560-T|Afu8g00370-T|Afu3g12120-T|Afu6g03590-T|Afu6g13790-T|Afu8g00250-T|Afu4g03410-T|Afu2g01290-T|Afu6g12180-T|Afu8g00200-T|Afu8g00170-T|Afu5g13840-T|Afu5g10310-T|Afu4g00210-T|Afu1g03195-T	http://amigo.geneontology.org/cgi-bin/amigo/term_details?term=GO:1901378
organic heteropentacyclic compound metabolic process	Gene Ontology	GO:1901376	15	51	0.0222498	Afu2g17560-T|Afu8g00370-T|Afu3g12120-T|Afu6g03590-T|Afu6g13790-T|Afu8g00250-T|Afu4g03410-T|Afu2g01290-T|Afu6g12180-T|Afu8g00200-T|Afu8g00170-T|Afu5g13840-T|Afu5g10310-T|Afu4g00210-T|Afu1g03195-T	http://amigo.geneontology.org/cgi-bin/amigo/term_details?term=GO:1901376
DNA-dependent DNA replication	Gene Ontology	GO:0006261	16	56	0.022794	Afu2g10730-T|Afu2g09060-T|Afu1g12940-T|Afu1g07530-T|Afu3g09560-T|Afu5g02520-T|Afu3g06060-T|Afu4g04390-T|Afu1g07320-T|Afu1g03920-T|Afu2g12250-T|Afu2g16600-T|Afu4g07970-T|Afu1g03410-T|Afu3g14010-T|Afu1g15310-T	http://amigo.geneontology.org/cgi-bin/amigo/term_details?term=GO:0006261
rRNA-containing ribonucleoprotein complex export from nucleus	Gene Ontology	GO:0071428	9	24	0.0231983	Afu2g10090-T|Afu1g06770-T|Afu1g04040-T|Afu7g04490-T|Afu1g05340-T|Afu3g13320-T|Afu1g05630-T|Afu7g01460-T|Afu6g12660-T	http://amigo.geneontology.org/cgi-bin/amigo/term_details?term=GO:0071428
nucleotide phosphorylation	Gene Ontology	GO:0046939	7	16	0.0242985	Afu1g03420-T|Afu4g00960-T|Afu1g07530-T|Afu4g06690-T|Afu6g02230-T|Afu5g13840-T|Afu5g03460-T	http://amigo.geneontology.org/cgi-bin/amigo/term_details?term=GO:0046939
quinone metabolic process	Gene Ontology	GO:1901661	10	29	0.0261456	Afu3g06120-T|Afu4g09810-T|Afu4g00225-T|Afu4g00590-T|Afu4g00220-T|Afu3g06410-T|Afu4g00230-T|Afu5g10310-T|Afu4g00210-T|Afu1g03195-T	http://amigo.geneontology.org/cgi-bin/amigo/term_details?term=GO:1901661
RNA export from nucleus	Gene Ontology	GO:0006405	9	25	0.0279813	Afu2g10090-T|Afu1g12940-T|Afu7g04490-T|Afu1g05340-T|Afu3g13320-T|Afu1g05630-T|Afu7g01460-T|Afu1g06770-T|Afu6g12660-T	http://amigo.geneontology.org/cgi-bin/amigo/term_details?term=GO:0006405
ergot alkaloid metabolic process	Gene Ontology	GO:0035836	5	9	0.0280638	Afu6g13990-T|Afu2g18050-T|Afu2g18030-T|Afu6g12050-T|Afu2g17960-T	http://amigo.geneontology.org/cgi-bin/amigo/term_details?term=GO:0035836
terpenoid indole alkaloid biosynthetic process	Gene Ontology	GO:0009709	5	9	0.0280638	Afu6g13990-T|Afu2g18050-T|Afu2g18030-T|Afu6g12050-T|Afu2g17960-T	http://amigo.geneontology.org/cgi-bin/amigo/term_details?term=GO:0009709
terpenoid indole alkaloid metabolic process	Gene Ontology	GO:0046447	5	9	0.0280638	Afu6g13990-T|Afu2g18050-T|Afu2g18030-T|Afu6g12050-T|Afu2g17960-T	http://amigo.geneontology.org/cgi-bin/amigo/term_details?term=GO:0046447
ergot alkaloid biosynthetic process	Gene Ontology	GO:0035837	5	9	0.0280638	Afu6g13990-T|Afu2g18050-T|Afu2g18030-T|Afu6g12050-T|Afu2g17960-T	http://amigo.geneontology.org/cgi-bin/amigo/term_details?term=GO:0035837
ribosome assembly	Gene Ontology	GO:0042255	11	34	0.0283616	Afu2g09210-T|Afu4g07730-T|Afu3g06640-T|Afu1g11130-T|Afu1g04040-T|Afu7g04490-T|Afu3g13320-T|Afu1g05080-T|Afu2g11850-T|Afu3g11260-T|Afu2g10440-T	http://amigo.geneontology.org/cgi-bin/amigo/term_details?term=GO:0042255
xanthone-containing compound biosynthetic process	Gene Ontology	GO:2001307	6	13	0.0303671	Afu3g12930-T|Afu2g17560-T|Afu8g00620-T|Afu2g17990-T|Afu8g00250-T|Afu2g17580-T	http://amigo.geneontology.org/cgi-bin/amigo/term_details?term=GO:2001307
polyol biosynthetic process	Gene Ontology	GO:0046173	7	17	0.0305213	Afu8g00370-T|Afu8g00230-T|Afu8g00910-T|Afu2g01290-T|Afu6g12070-T|Afu8g00200-T|Afu2g10660-T	http://amigo.geneontology.org/cgi-bin/amigo/term_details?term=GO:0046173
cellular response to UV	Gene Ontology	GO:0034644	7	17	0.0305213	Afu1g12940-T|Afu4g10860-T|Afu2g16600-T|Afu2g12250-T|Afu1g01600-T|Afu4g07970-T|Afu3g06060-T	http://amigo.geneontology.org/cgi-bin/amigo/term_details?term=GO:0034644
pyrimidine deoxyribonucleoside triphosphate metabolic process	Gene Ontology	GO:0009211	4	6	0.0324472	Afu4g06690-T|Afu1g02890-T|Afu5g03460-T|Afu3g14580-T	http://amigo.geneontology.org/cgi-bin/amigo/term_details?term=GO:0009211
deoxyribonucleoside triphosphate metabolic process	Gene Ontology	GO:0009200	4	6	0.0324472	Afu4g06690-T|Afu1g02890-T|Afu5g03460-T|Afu3g14580-T	http://amigo.geneontology.org/cgi-bin/amigo/term_details?term=GO:0009200
alcohol biosynthetic process	Gene Ontology	GO:0046165	17	64	0.0324914	Afu2g01290-T|Afu8g00370-T|Afu2g07680-T|Afu3g11070-T|Afu2g18030-T|Afu8g00230-T|Afu8g00910-T|Afu6g13990-T|Afu2g18050-T|Afu5g07780-T|Afu6g12070-T|Afu5g06240-T|Afu8g00200-T|Afu4g11500-T|Afu4g03630-T|Afu2g10660-T|Afu1g04540-T	http://amigo.geneontology.org/cgi-bin/amigo/term_details?term=GO:0046165
single-organism process	Gene Ontology	GO:0044699	377	2274	0.0336763	Afu1g08810-T|Afu3g09370-T|Afu5g01590-T|Afu8g05460-T|Afu2g03150-T|Afu2g11240-T|Afu6g07770-T|Afu7g01400-T|Afu2g09650-T|Afu8g00490-T|Afu6g02300-T|Afu8g05140-T|Afu4g13170-T|Afu3g02840-T|Afu8g01410-T|Afu1g02550-T|Afu7g05800-T|Afu4g03410-T|Afu2g01660-T|Afu7g01980-T|Afu6g08660-T|Afu8g00220-T|Afu2g09060-T|Afu6g03290-T|Afu3g03560-T|Afu7g06100-T|Afu1g01600-T|Afu6g13945-T|Afu4g04270-T|Afu1g03690-T|Afu6g1088…	http://amigo.geneontology.org/cgi-bin/amigo/term_details?term=GO:0044699
ribosomal small subunit biogenesis	Gene Ontology	GO:0042274	14	50	0.0360385	Afu2g03590-T|Afu2g02150-T|Afu3g06640-T|Afu7g02140-T|Afu1g09440-T|Afu1g04320-T|Afu2g10500-T|Afu7g04490-T|Afu1g05340-T|Afu3g13320-T|Afu5g05450-T|Afu4g10800-T|Afu3g11260-T|Afu2g10440-T	http://amigo.geneontology.org/cgi-bin/amigo/term_details?term=GO:0042274
shamixanthone metabolic process	Gene Ontology	GO:1900791	5	10	0.0376531	Afu2g17990-T|Afu3g12930-T|Afu8g00620-T|Afu8g00250-T|Afu4g00210-T	http://amigo.geneontology.org/cgi-bin/amigo/term_details?term=GO:1900791
shamixanthone biosynthetic process	Gene Ontology	GO:1900793	5	10	0.0376531	Afu2g17990-T|Afu3g12930-T|Afu8g00620-T|Afu8g00250-T|Afu4g00210-T	http://amigo.geneontology.org/cgi-bin/amigo/term_details?term=GO:1900793
maturation of SSU-rRNA from tricistronic rRNA transcript (SSU-rRNA, 5.8S rRNA, LSU-rRNA)	Gene Ontology	GO:0000462	11	36	0.0381447	Afu2g03590-T|Afu2g02150-T|Afu3g06640-T|Afu7g02140-T|Afu1g09440-T|Afu1g04320-T|Afu2g10500-T|Afu3g13320-T|Afu5g05450-T|Afu4g10800-T|Afu2g10440-T	http://amigo.geneontology.org/cgi-bin/amigo/term_details?term=GO:0000462
xanthone-containing compound metabolic process	Gene Ontology	GO:2001305	6	14	0.0386967	Afu3g12930-T|Afu2g17560-T|Afu8g00620-T|Afu2g17990-T|Afu8g00250-T|Afu2g17580-T	http://amigo.geneontology.org/cgi-bin/amigo/term_details?term=GO:2001305
tetrapyrrole biosynthetic process	Gene Ontology	GO:0033014	6	14	0.0386967	Afu1g05060-T|Afu6g08440-T|Afu6g12980-T|Afu5g11760-T|Afu3g13120-T|Afu1g07480-T	http://amigo.geneontology.org/cgi-bin/amigo/term_details?term=GO:0033014
purine ribonucleoside diphosphate metabolic process	Gene Ontology	GO:0009179	6	14	0.0386967	Afu4g00960-T|Afu1g07530-T|Afu3g11070-T|Afu6g02230-T|Afu5g06240-T|Afu5g13840-T	http://amigo.geneontology.org/cgi-bin/amigo/term_details?term=GO:0009179
tetrapyrrole metabolic process	Gene Ontology	GO:0033013	6	14	0.0386967	Afu1g05060-T|Afu6g08440-T|Afu6g12980-T|Afu5g11760-T|Afu3g13120-T|Afu1g07480-T	http://amigo.geneontology.org/cgi-bin/amigo/term_details?term=GO:0033013
diol biosynthetic process	Gene Ontology	GO:0034312	6	14	0.0386967	Afu8g00370-T|Afu8g00230-T|Afu8g00910-T|Afu2g01290-T|Afu6g12070-T|Afu8g00200-T	http://amigo.geneontology.org/cgi-bin/amigo/term_details?term=GO:0034312
purine nucleoside diphosphate metabolic process	Gene Ontology	GO:0009135	6	14	0.0386967	Afu4g00960-T|Afu1g07530-T|Afu3g11070-T|Afu6g02230-T|Afu5g06240-T|Afu5g13840-T	http://amigo.geneontology.org/cgi-bin/amigo/term_details?term=GO:0009135
ADP metabolic process	Gene Ontology	GO:0046031	6	14	0.0386967	Afu4g00960-T|Afu1g07530-T|Afu3g11070-T|Afu6g02230-T|Afu5g06240-T|Afu5g13840-T	http://amigo.geneontology.org/cgi-bin/amigo/term_details?term=GO:0046031
microtubule polymerization	Gene Ontology	GO:0046785	4	7	0.0458018	Afu6g08660-T|Afu1g13390-T|Afu3g09370-T|Afu1g02550-T	http://amigo.geneontology.org/cgi-bin/amigo/term_details?term=GO:0046785
carbohydrate phosphorylation	Gene Ontology	GO:0046835	4	7	0.0458018	Afu6g02230-T|Afu7g04040-T|Afu6g03980-T|Afu4g00960-T	http://amigo.geneontology.org/cgi-bin/amigo/term_details?term=GO:0046835
glucose metabolic process	Gene Ontology	GO:0006006	9	28	0.0463761	Afu8g02560-T|Afu4g11310-T|Afu4g07710-T|Afu3g11070-T|Afu7g05800-T|Afu5g14530-T|Afu6g02230-T|Afu5g06240-T|Afu5g01030-T	http://amigo.geneontology.org/cgi-bin/amigo/term_details?term=GO:0006006
nucleic acid transport	Gene Ontology	GO:0050657	9	28	0.0463761	Afu2g10090-T|Afu1g12940-T|Afu7g04490-T|Afu1g05340-T|Afu3g13320-T|Afu1g05630-T|Afu7g01460-T|Afu1g06770-T|Afu6g12660-T	http://amigo.geneontology.org/cgi-bin/amigo/term_details?term=GO:0050657
establishment of RNA localization	Gene Ontology	GO:0051236	9	28	0.0463761	Afu2g10090-T|Afu1g12940-T|Afu7g04490-T|Afu1g05340-T|Afu3g13320-T|Afu1g05630-T|Afu7g01460-T|Afu1g06770-T|Afu6g12660-T	http://amigo.geneontology.org/cgi-bin/amigo/term_details?term=GO:0051236
RNA transport	Gene Ontology	GO:0050658	9	28	0.0463761	Afu2g10090-T|Afu1g12940-T|Afu7g04490-T|Afu1g05340-T|Afu3g13320-T|Afu1g05630-T|Afu7g01460-T|Afu1g06770-T|Afu6g12660-T	http://amigo.geneontology.org/cgi-bin/amigo/term_details?term=GO:0050658
mitotic DNA replication	Gene Ontology	GO:1902969	6	15	0.0483457	Afu2g10730-T|Afu2g09060-T|Afu3g09560-T|Afu3g06060-T|Afu1g07320-T|Afu1g15310-T	http://amigo.geneontology.org/cgi-bin/amigo/term_details?term=GO:1902969
response to hydrogen peroxide	Gene Ontology	GO:0042542	6	15	0.0483457	Afu3g12270-T|Afu1g12940-T|Afu4g10860-T|Afu3g02270-T|Afu1g17360-T|Afu6g12180-T	http://amigo.geneontology.org/cgi-bin/amigo/term_details?term=GO:0042542
depsipeptide biosynthetic process	Gene Ontology	GO:0050763	5	11	0.0490136	Afu8g00170-T|Afu6g13990-T|Afu8g00370-T|Afu2g01290-T|Afu6g12080-T	http://amigo.geneontology.org/cgi-bin/amigo/term_details?term=GO:0050763
depsipeptide metabolic process	Gene Ontology	GO:0050761	5	11	0.0490136	Afu8g00170-T|Afu6g13990-T|Afu8g00370-T|Afu2g01290-T|Afu6g12080-T	http://amigo.geneontology.org/cgi-bin/amigo/term_details?term=GO:0050761
emericellamide metabolic process	Gene Ontology	GO:1900555	5	11	0.0490136	Afu8g00170-T|Afu6g13990-T|Afu8g00370-T|Afu2g01290-T|Afu6g12080-T	http://amigo.geneontology.org/cgi-bin/amigo/term_details?term=GO:1900555
pyrimidine nucleotide biosynthetic process	Gene Ontology	GO:0006221	5	11	0.0490136	Afu4g06690-T|Afu5g12350-T|Afu4g04270-T|Afu5g03460-T|Afu8g00850-T	http://amigo.geneontology.org/cgi-bin/amigo/term_details?term=GO:0006221
emericellamide biosynthetic process	Gene Ontology	GO:1900557	5	11	0.0490136	Afu8g00170-T|Afu6g13990-T|Afu8g00370-T|Afu2g01290-T|Afu6g12080-T	http://amigo.geneontology.org/cgi-bin/amigo/term_details?term=GO:1900557
